# Supplementary material for: National, subnational and risk attributed burden of chronic respiratory diseases in Iran from 1990 to 2019
Source: Springer Nature journal article supplement (doi:10.1186/s12931-023-02353-1), 2023-03-11

**Incidence**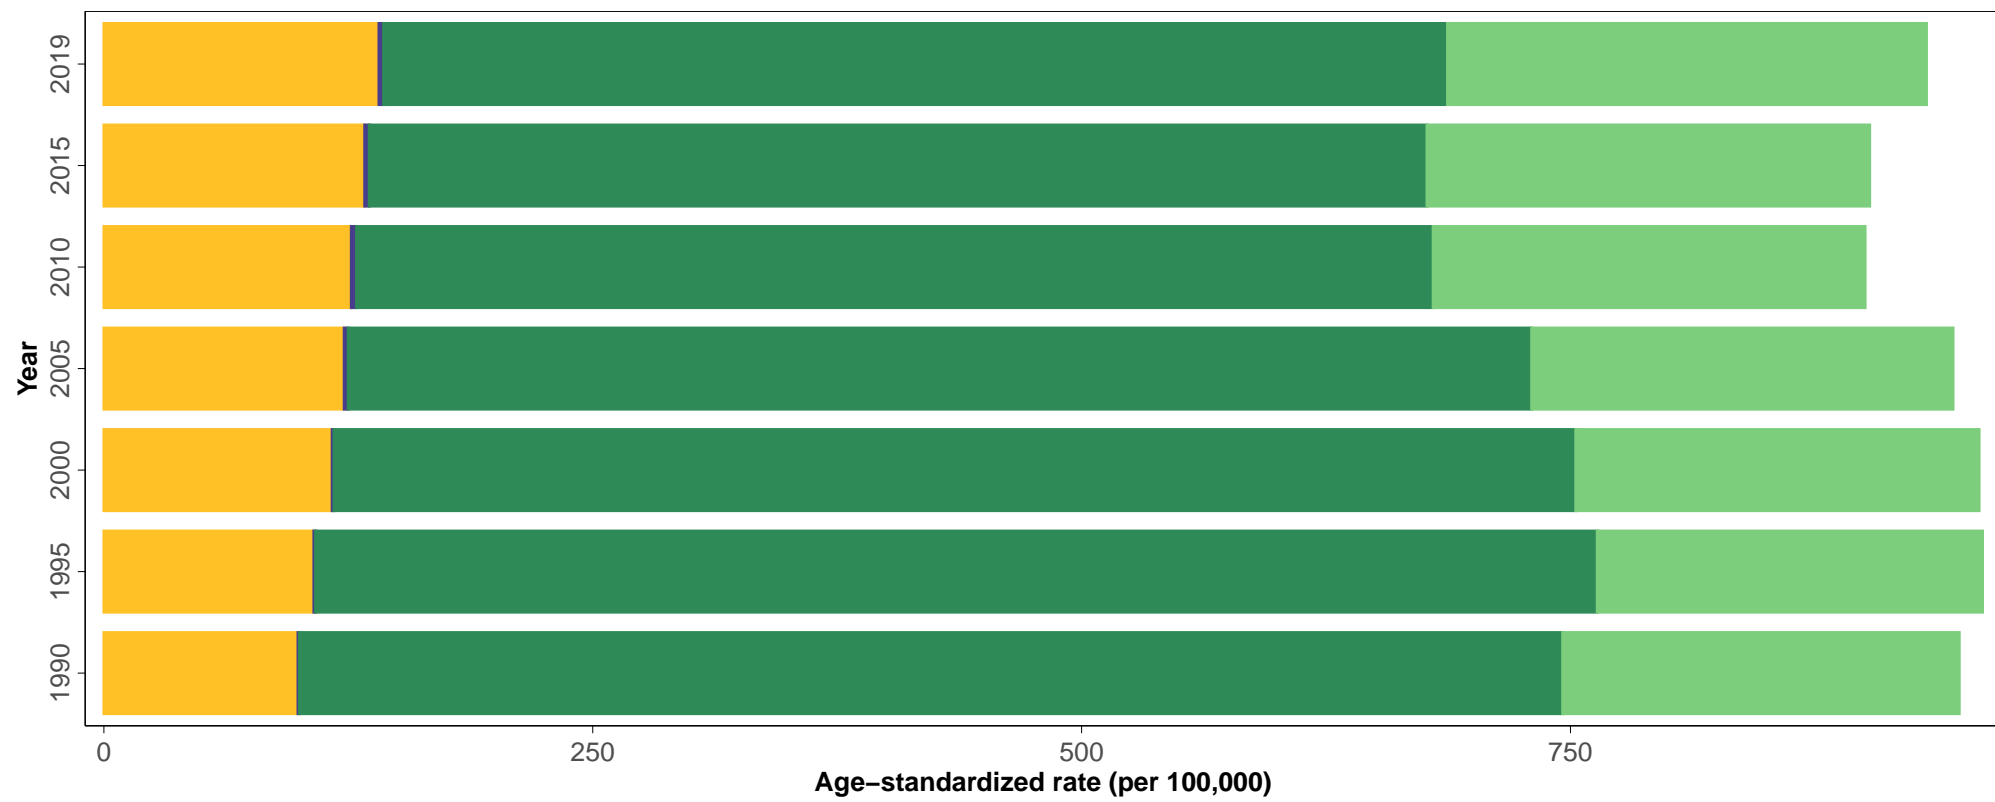**Prevalence**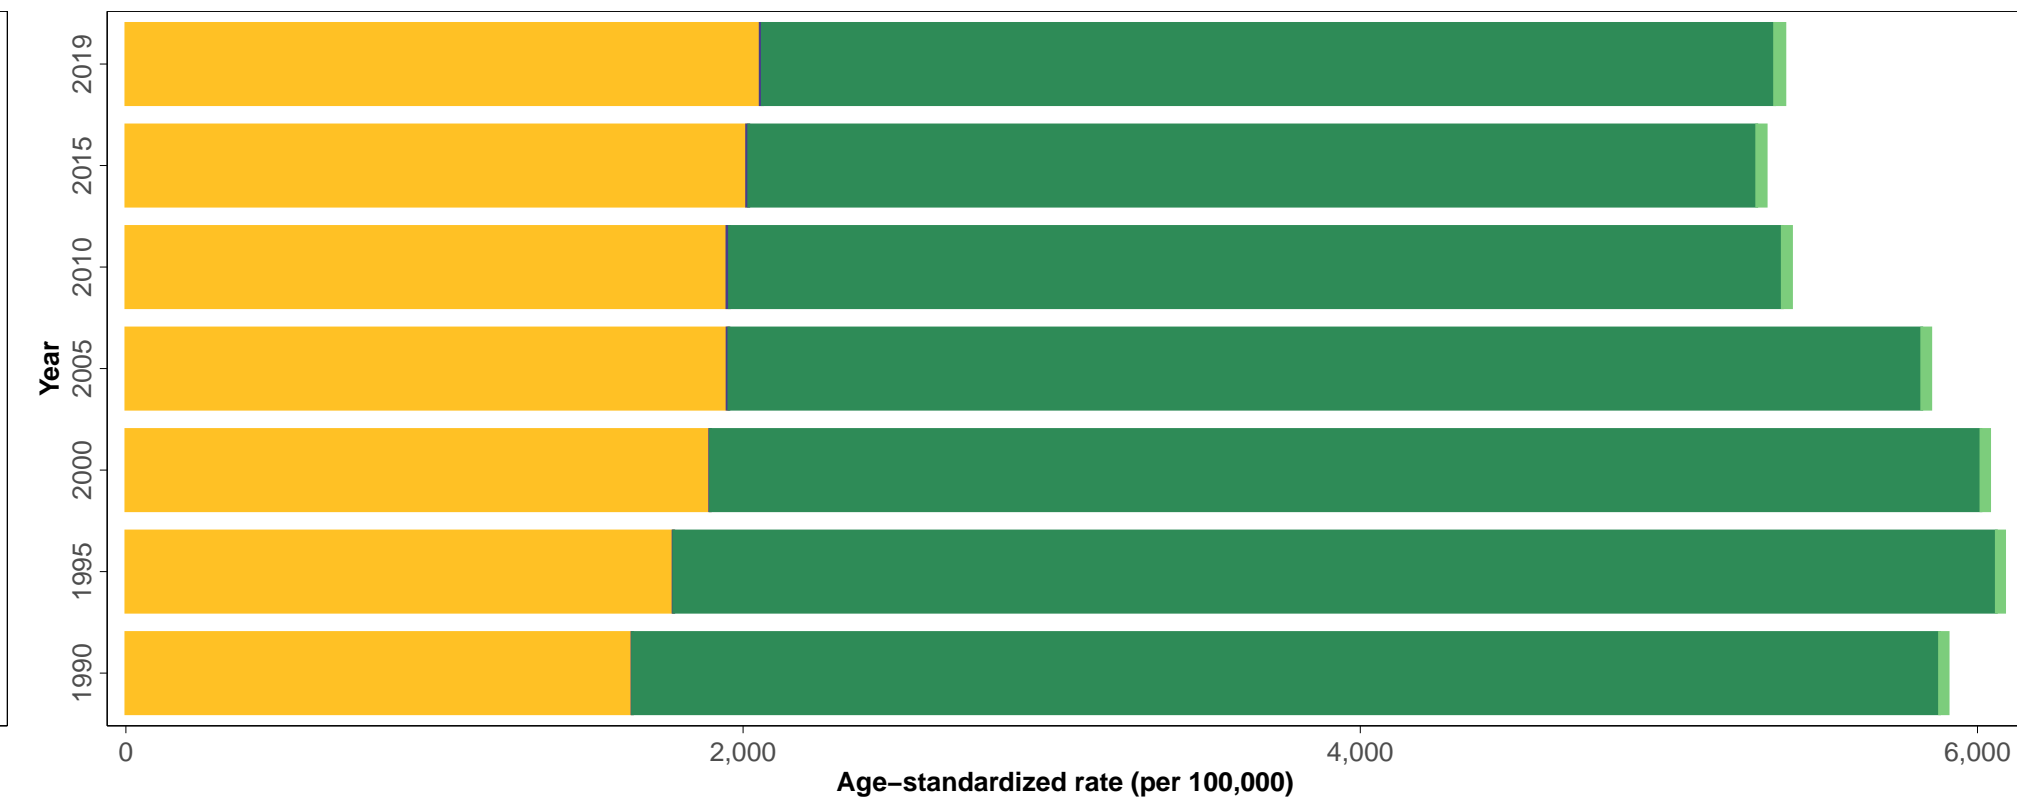**Deaths**

■ COPD 
 ■ Pneumoconiosis 
 ■ Asthma 
 ■ Interstitial lung disease and pulmonary sarcoidosis 
 ■ Other chronic respiratory diseases

**DALYs**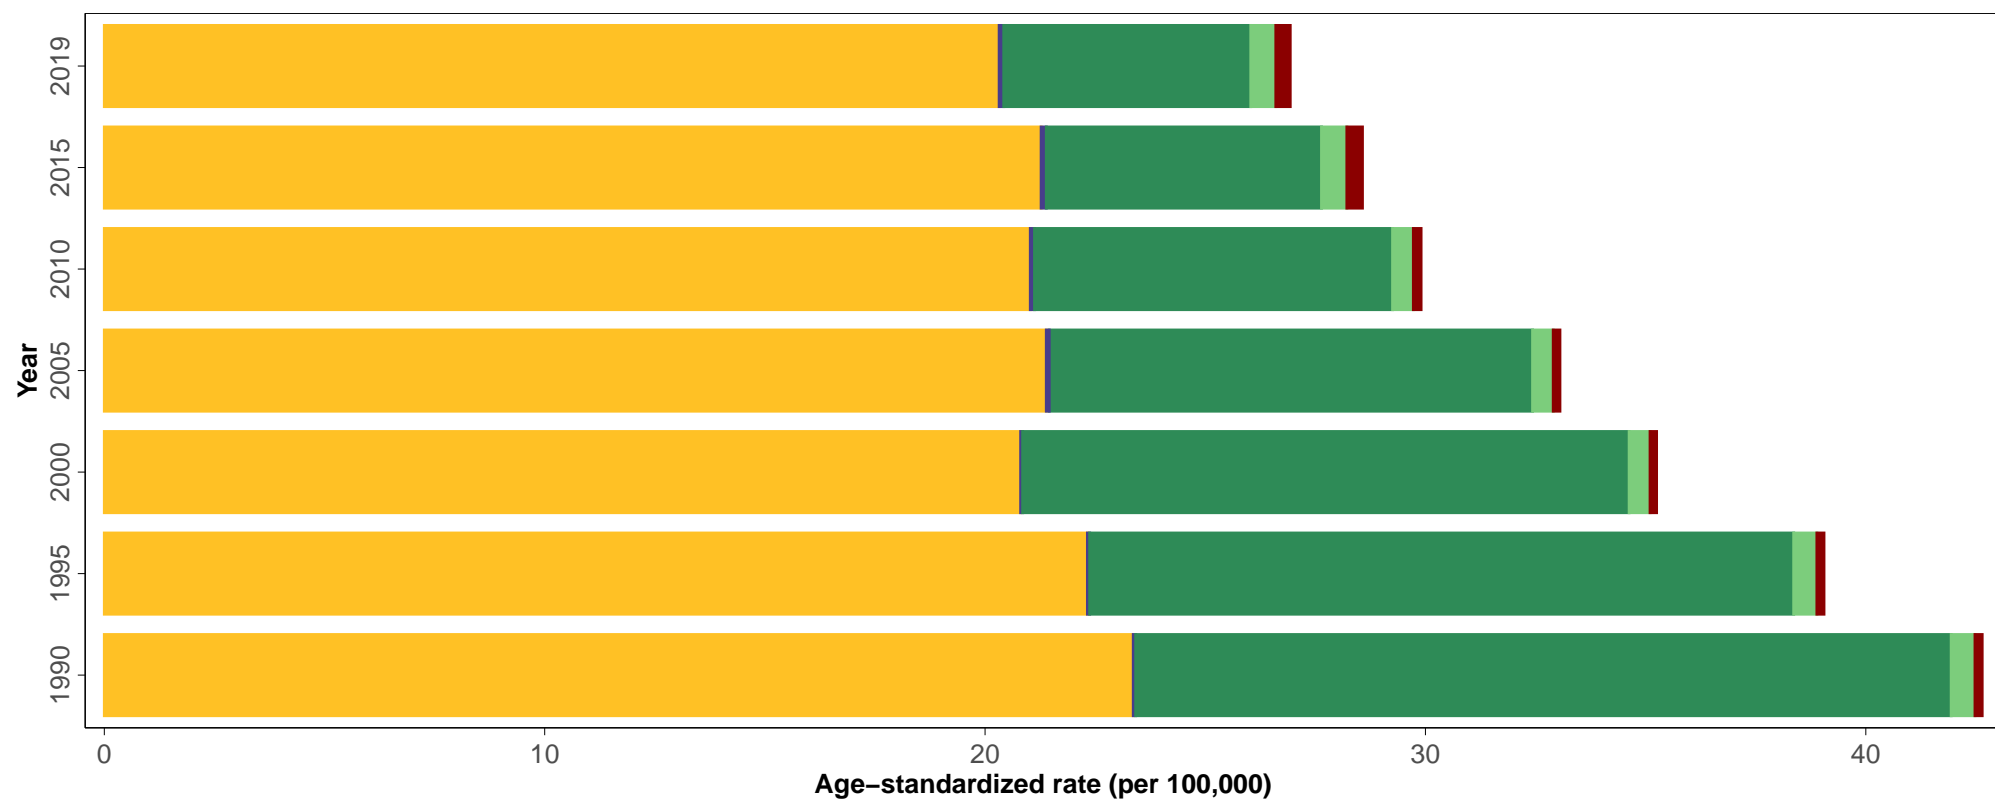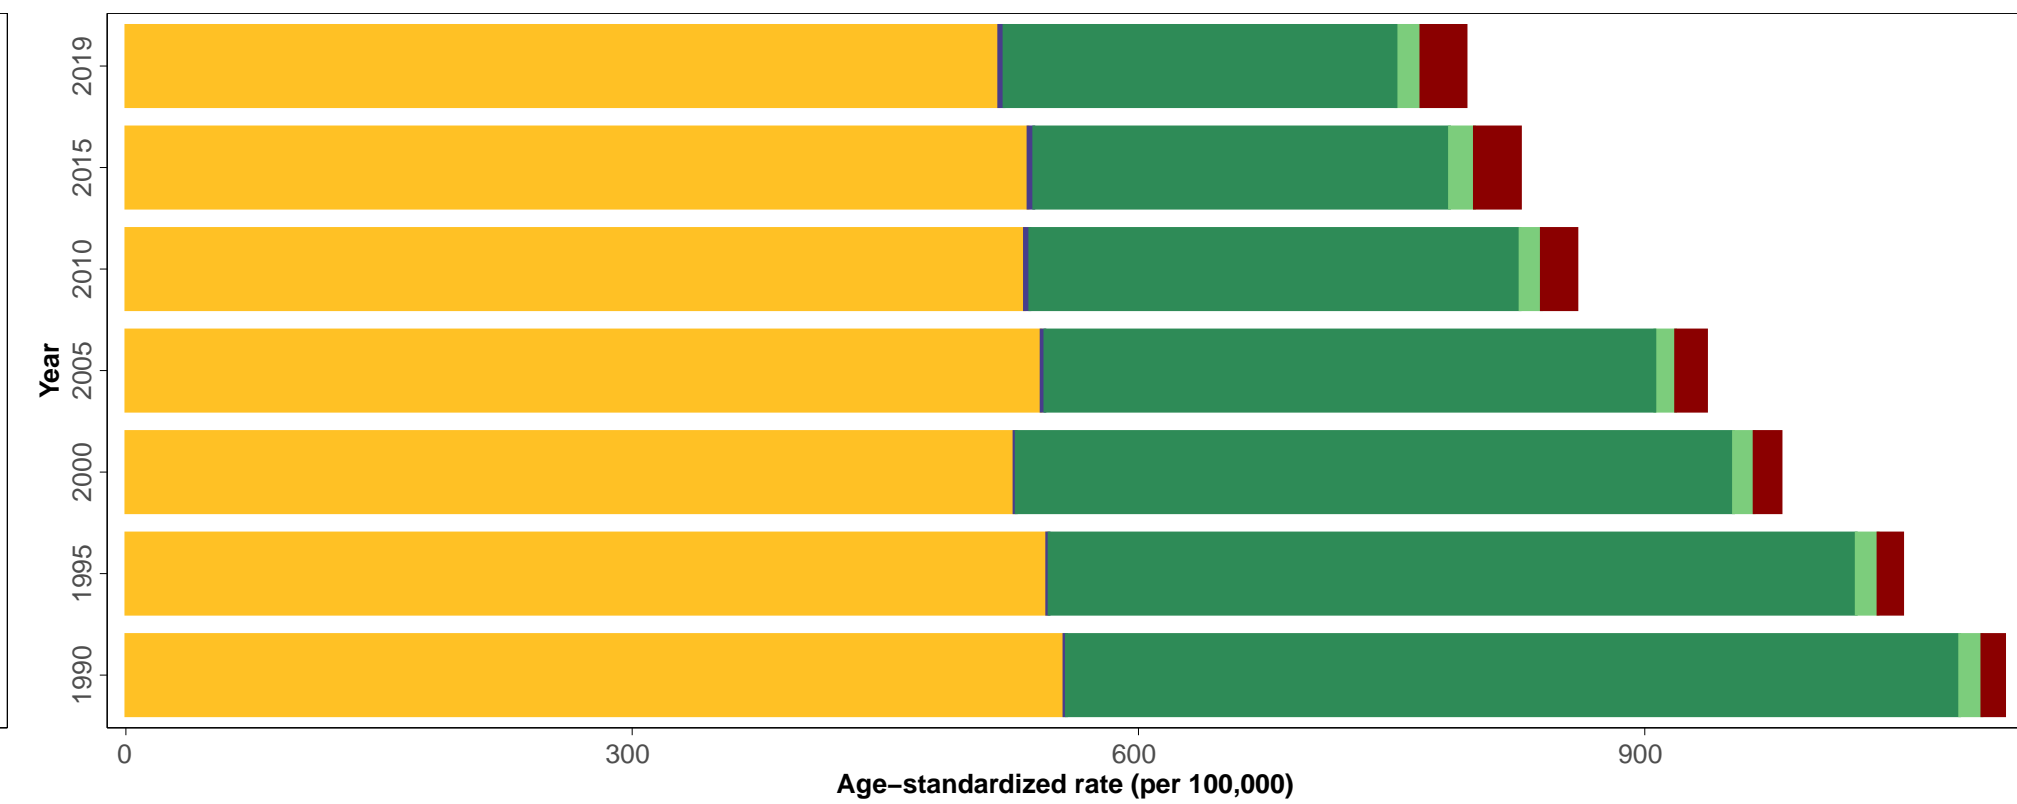

Supplement: MOESM1 [file 24613202]
