# Supplementary material for: National, subnational and risk attributed burden of chronic respiratory diseases in Iran from 1990 to 2019
Source: Springer Nature journal article supplement (doi:10.1186/s12931-023-02353-1), 2023-03-11

**Incidence****Prevalence**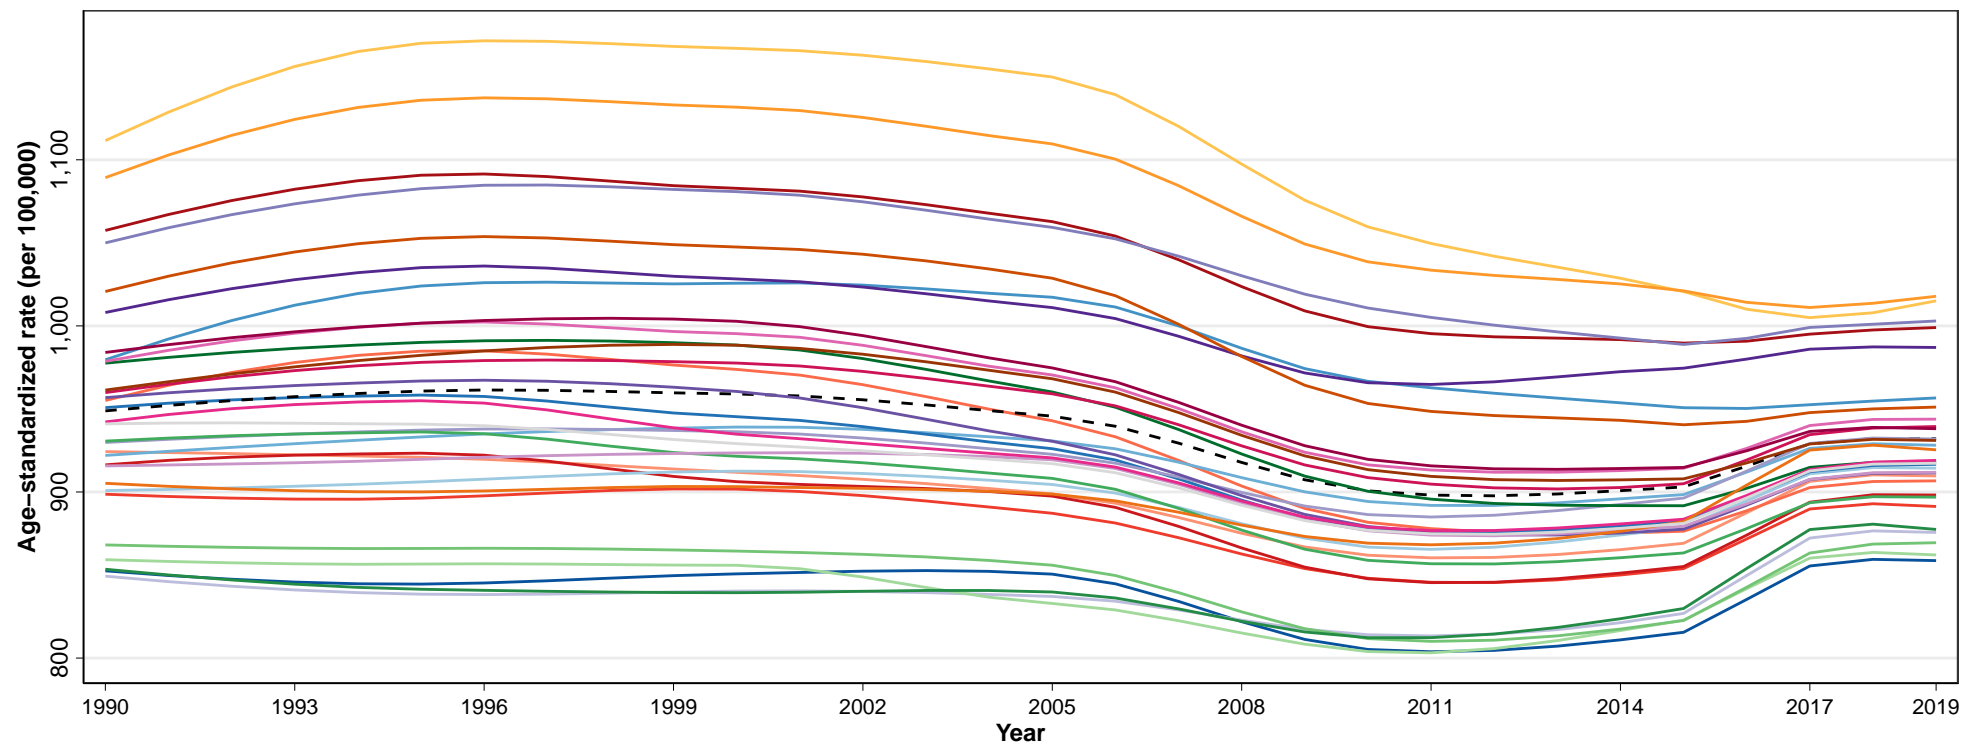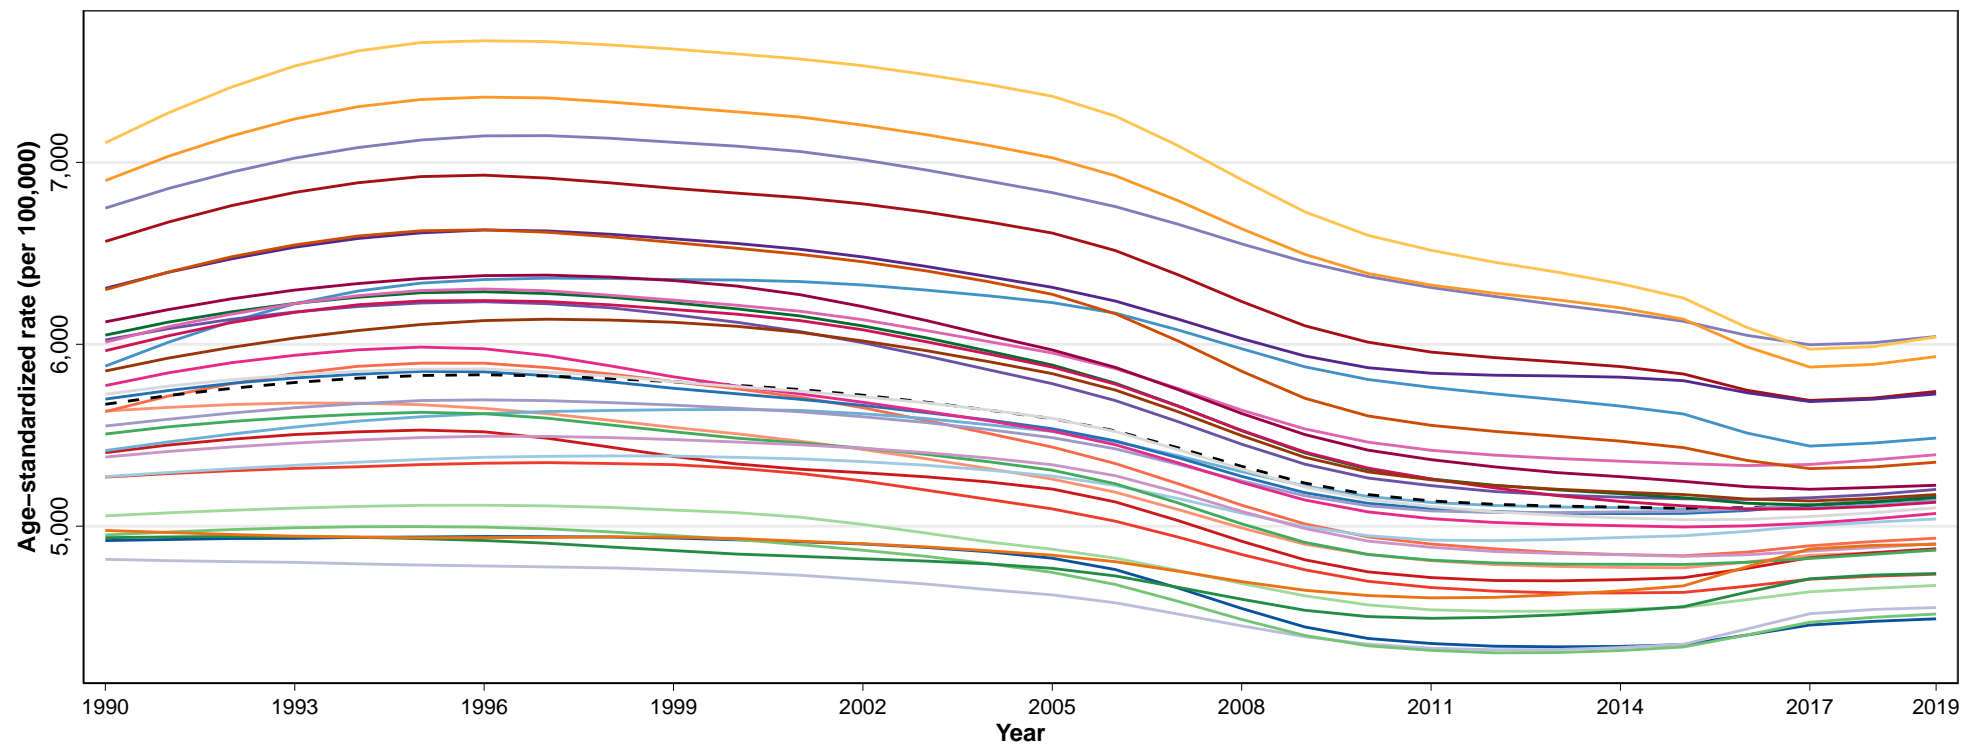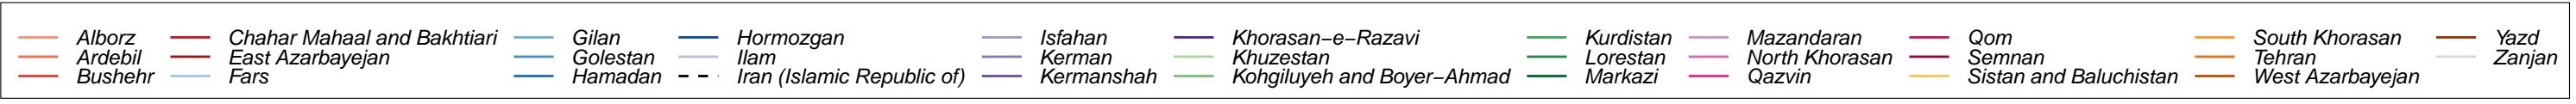**Deaths****DALYs**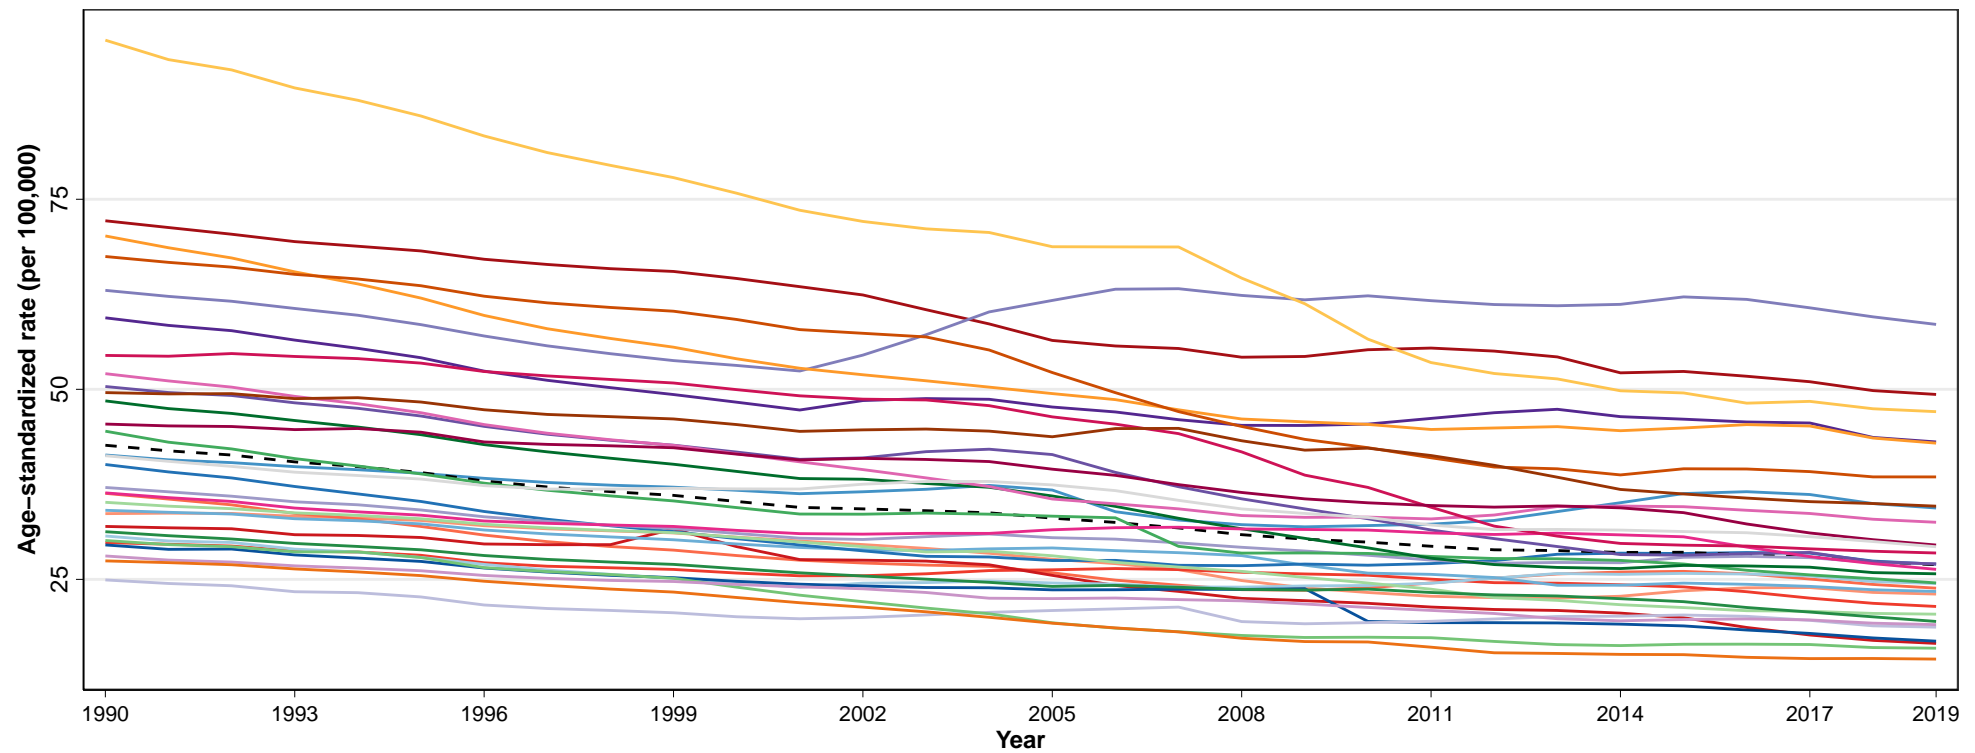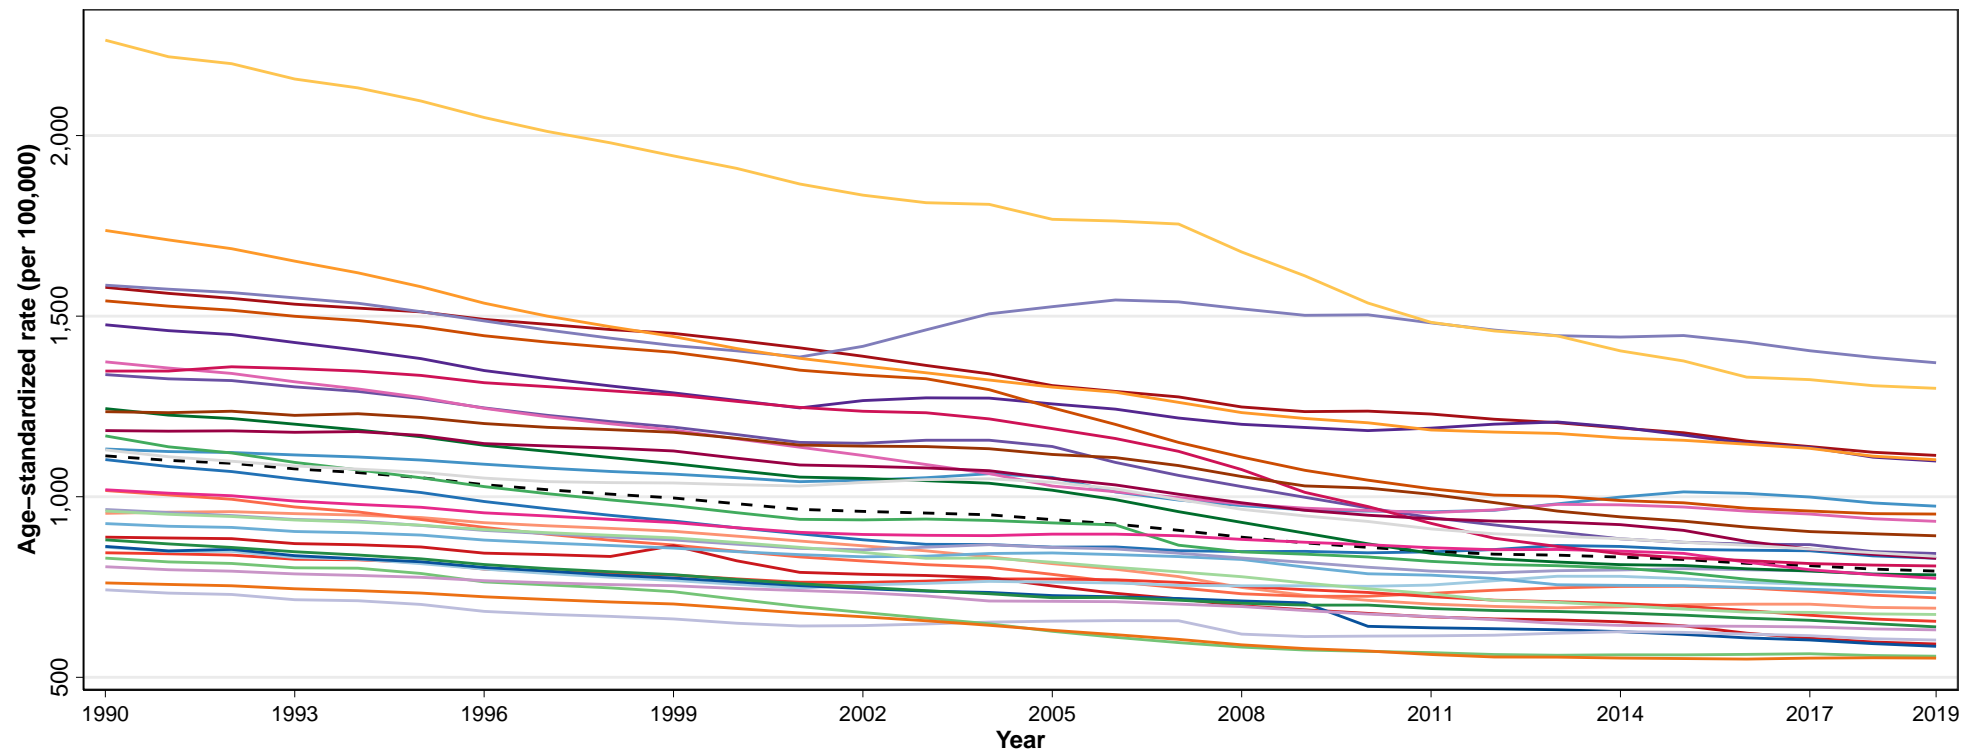

Supplement: MOESM2 [file 24613202]
