# Supplementary material for: National, subnational and risk attributed burden of chronic respiratory diseases in Iran from 1990 to 2019
Source: Springer Nature journal article supplement (doi:10.1186/s12931-023-02353-1), 2023-03-11
Supplement: MOESM3 [file 24613202]

# Alborz

**Incidence**  
1990 2019

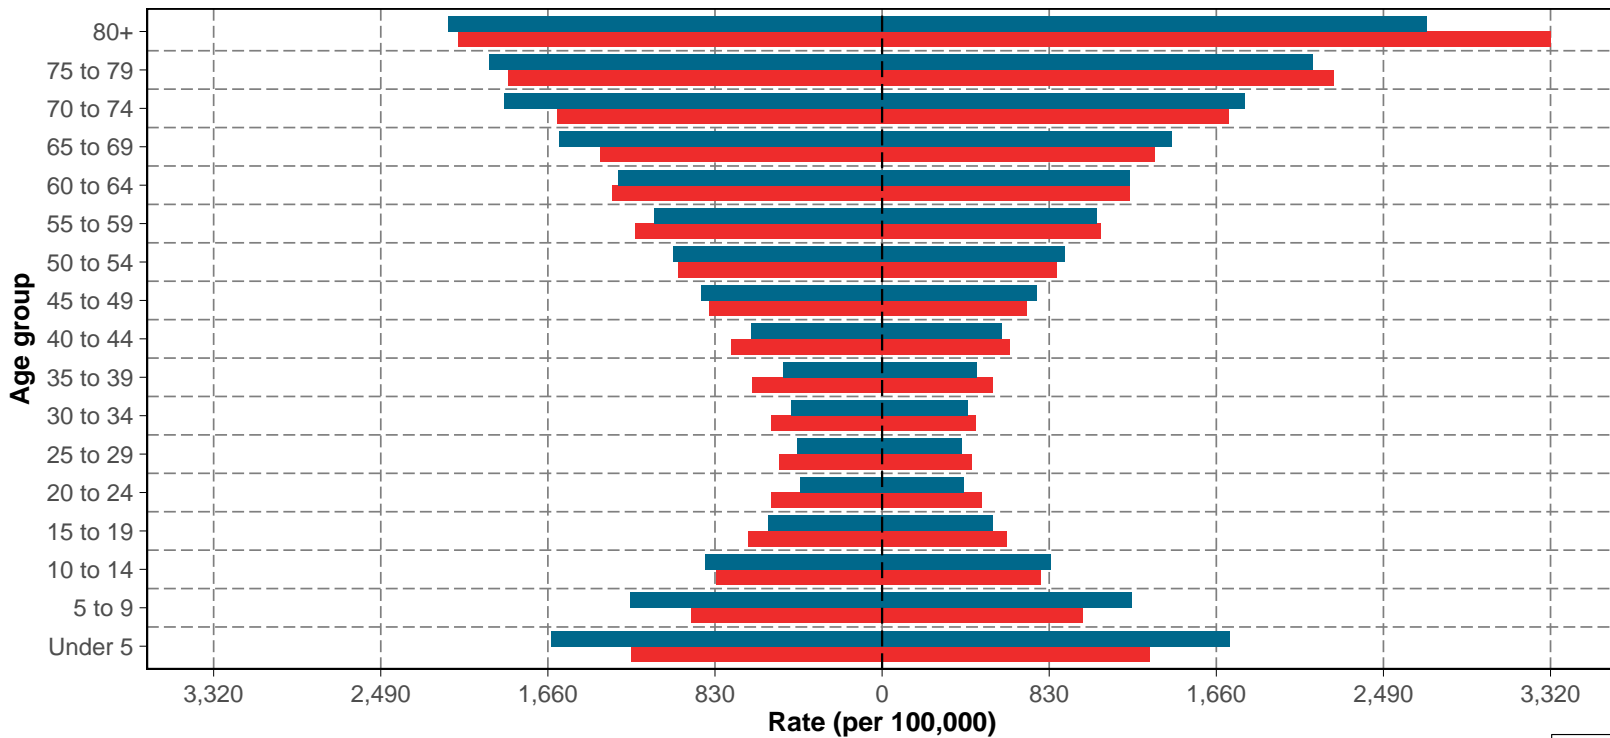

**Prevalence**  
1990 2019

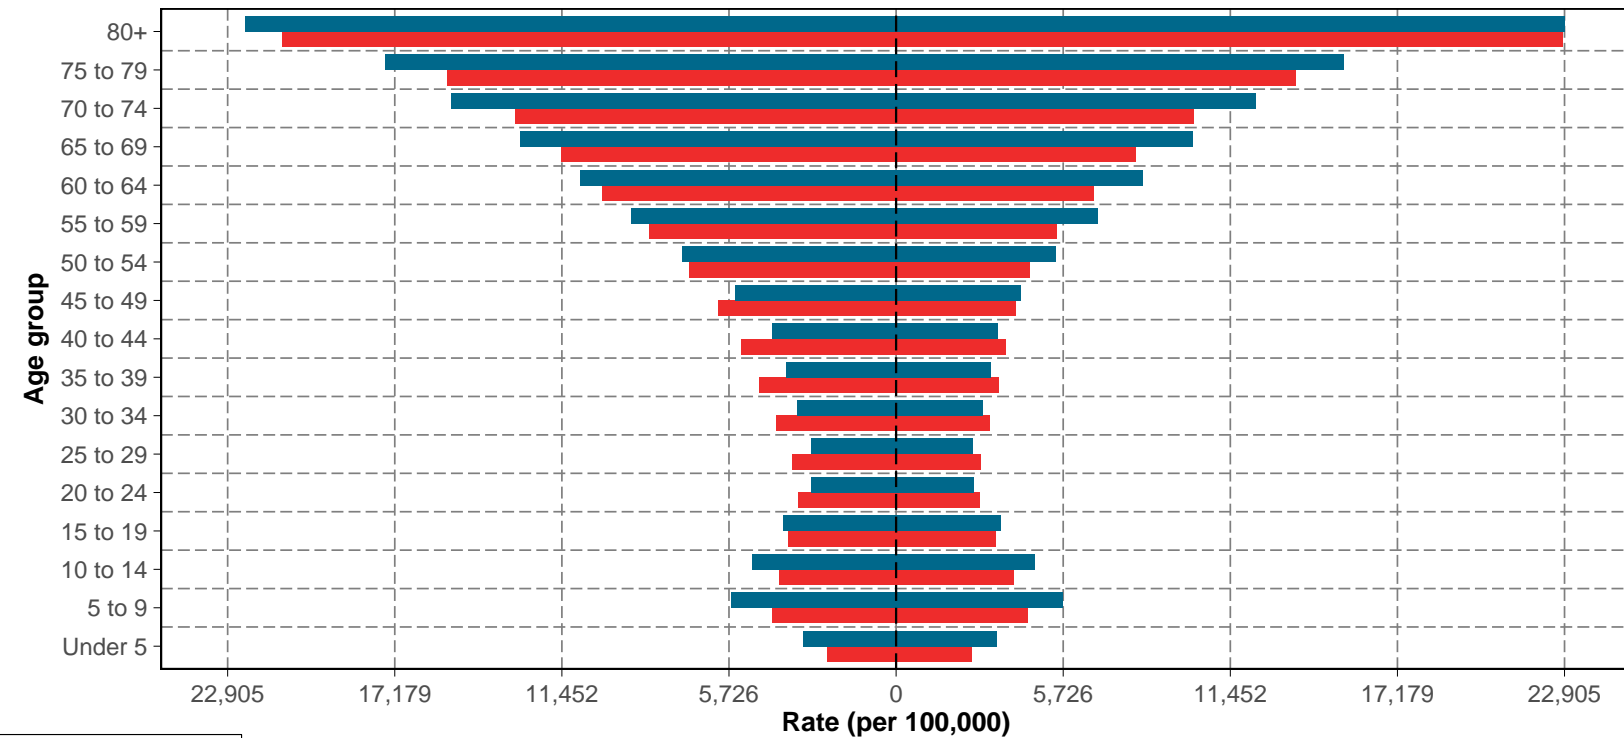

**Deaths**  
1990 2019

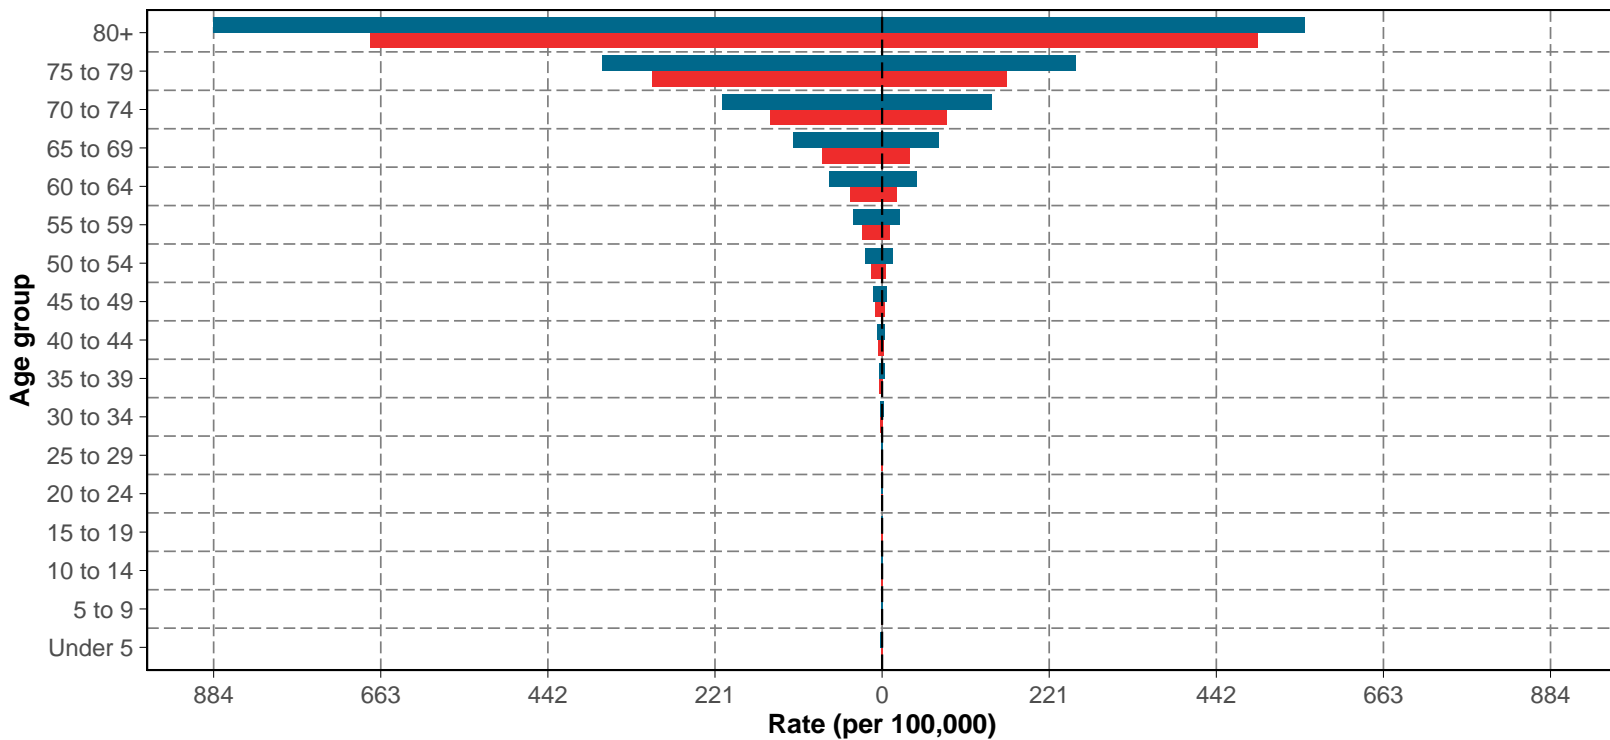

**DALYs**  
1990 2019

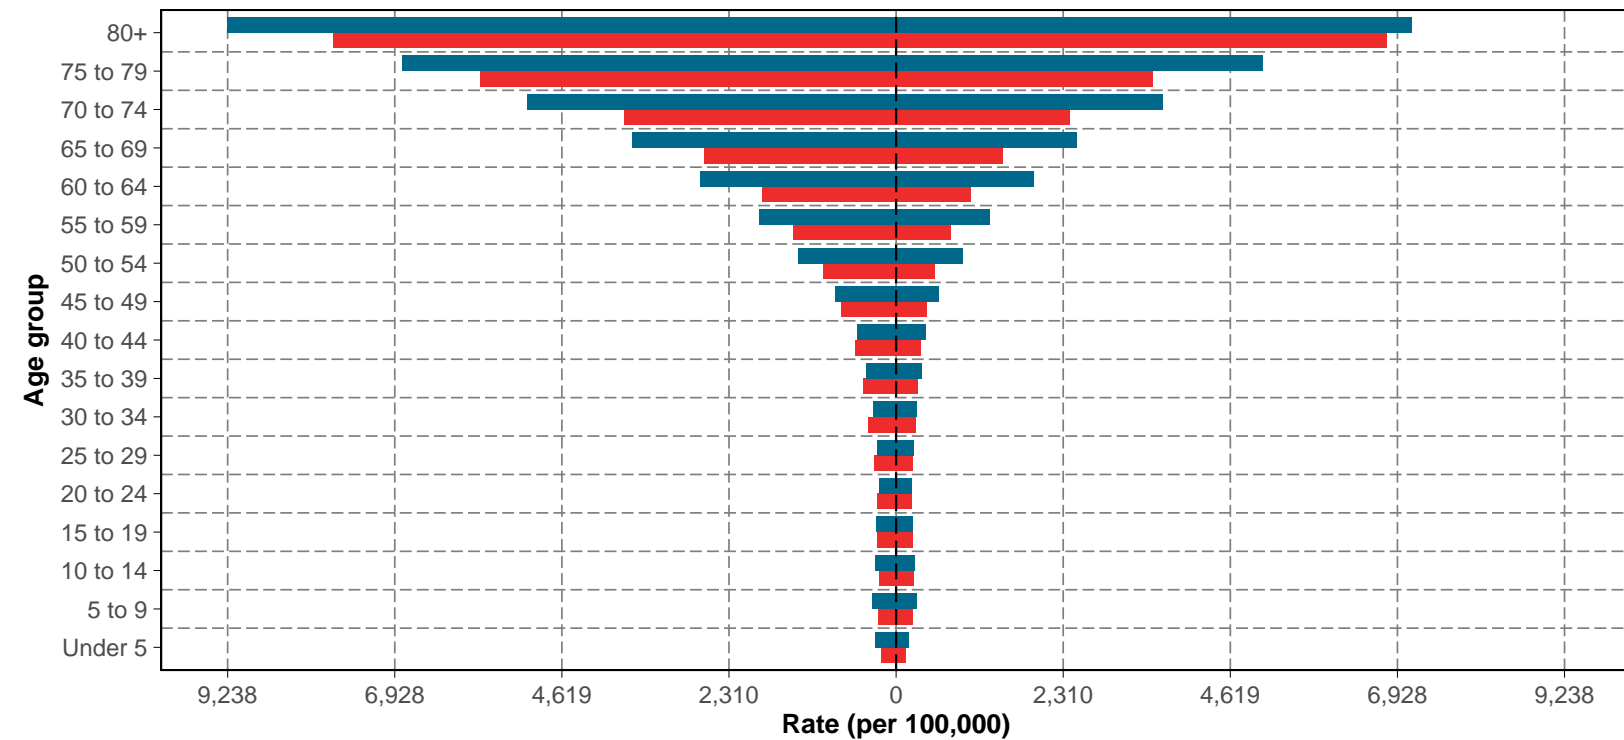

**Sex**  
Female Male

# Ardebil

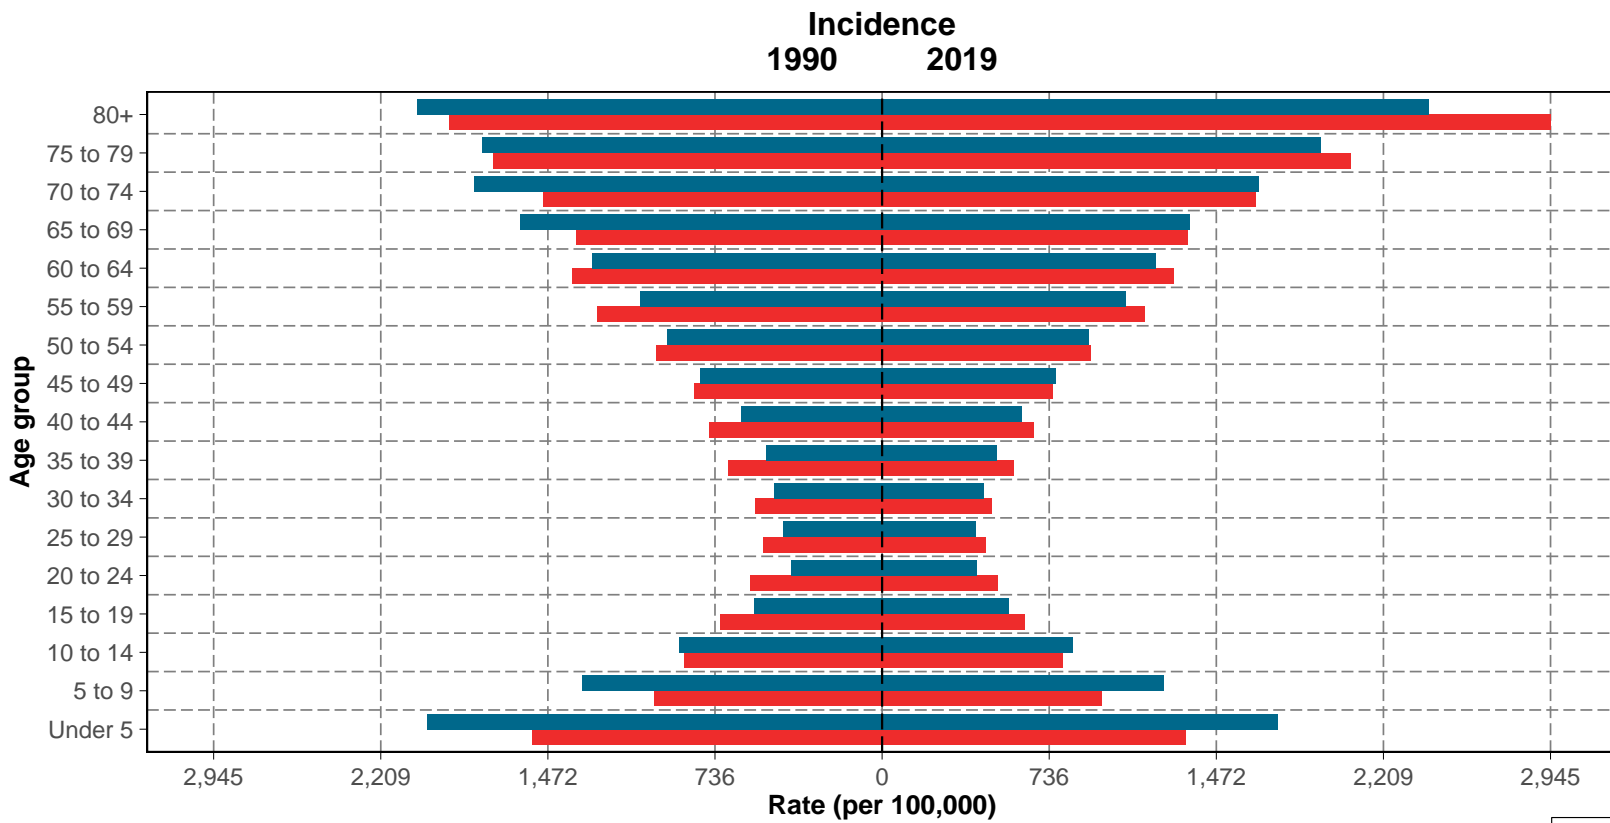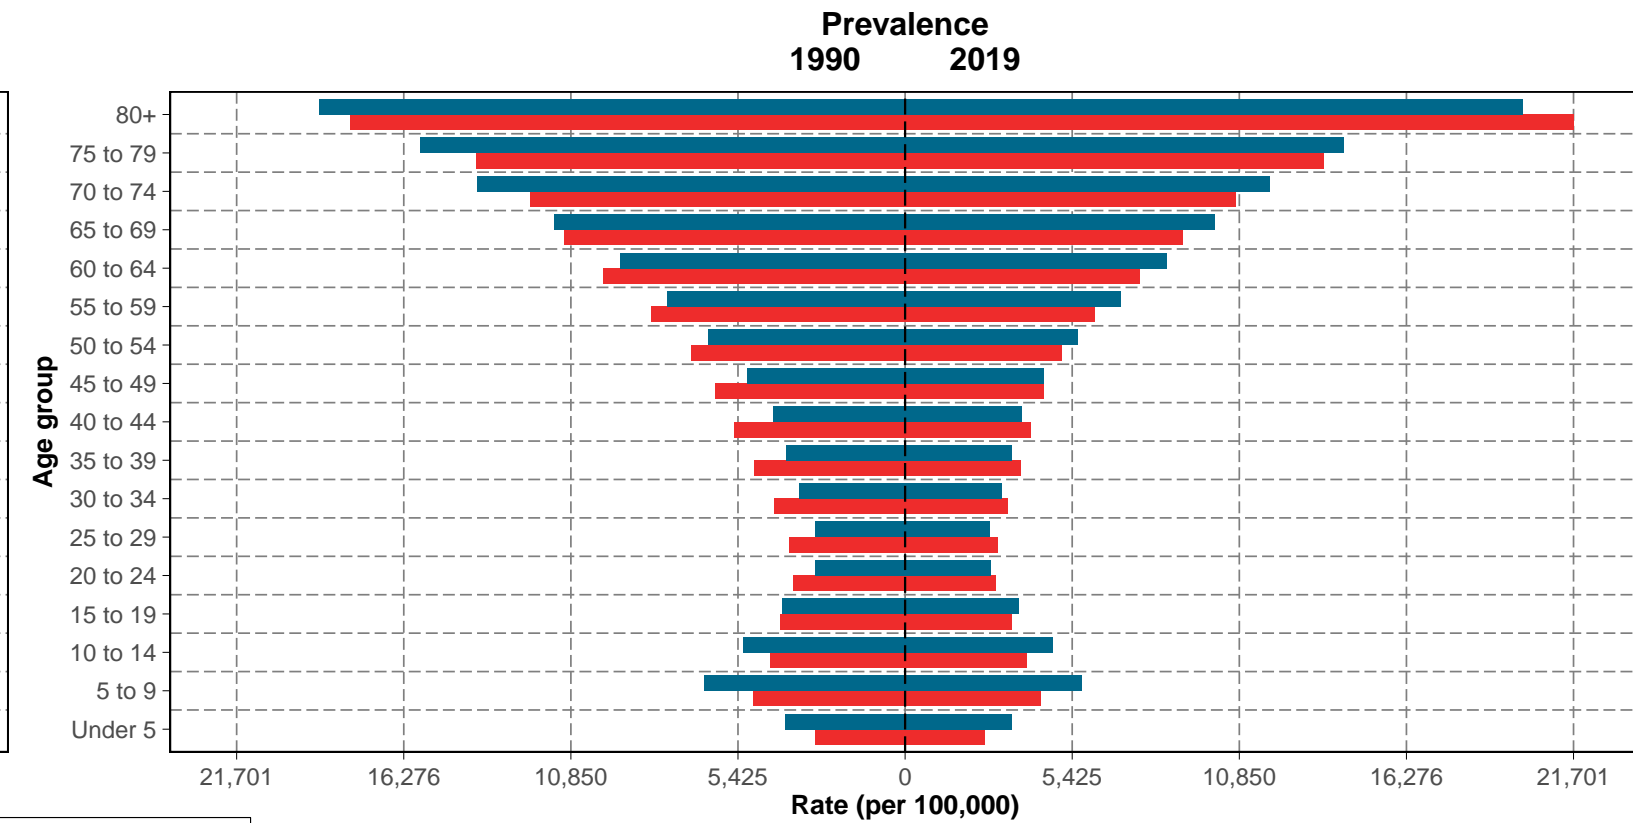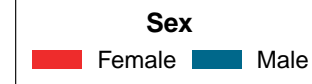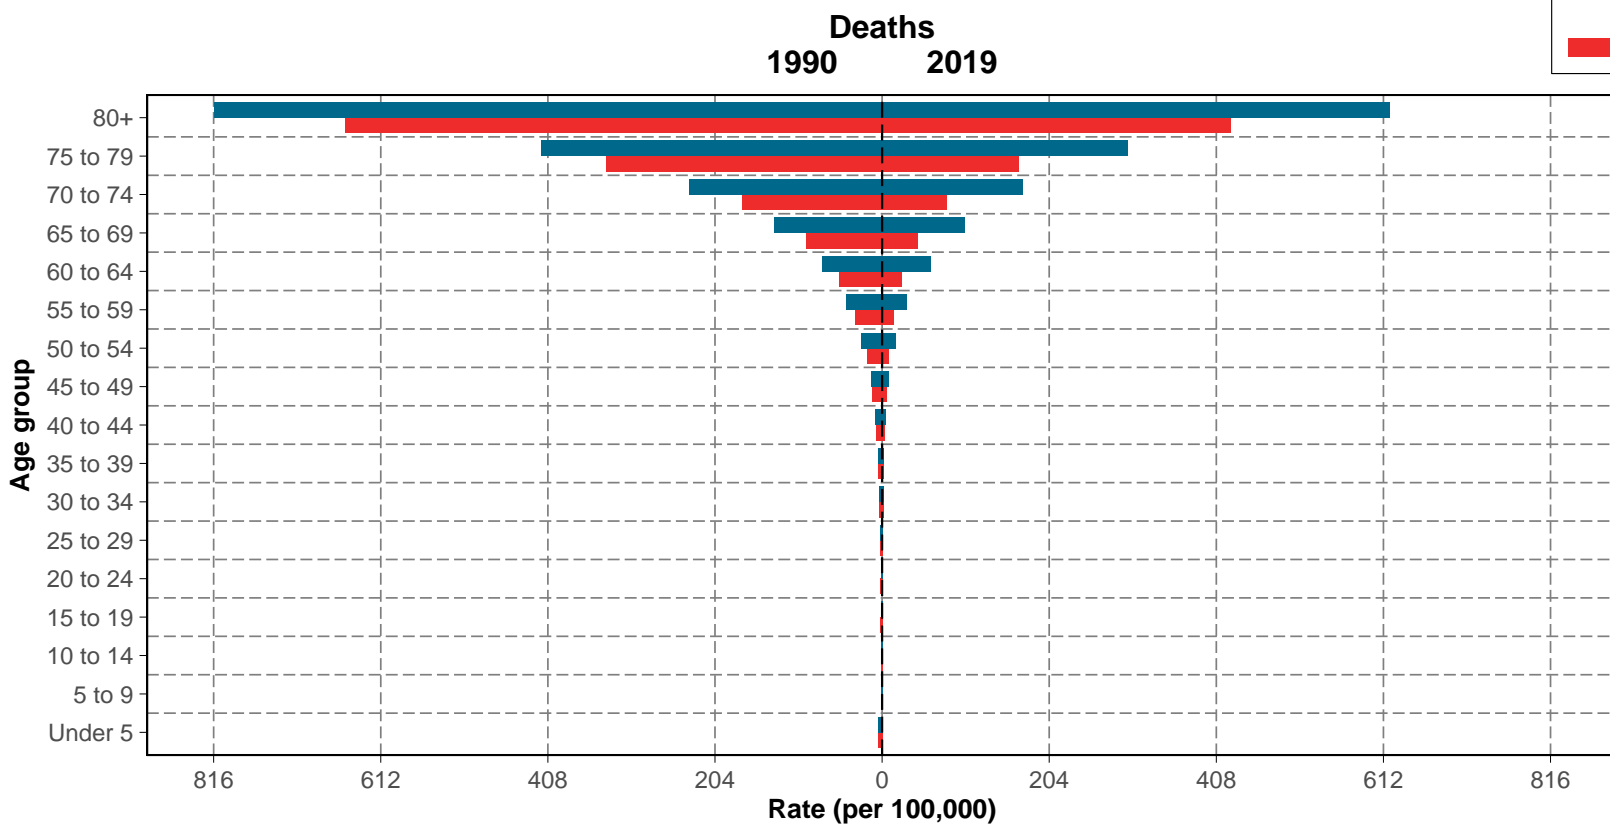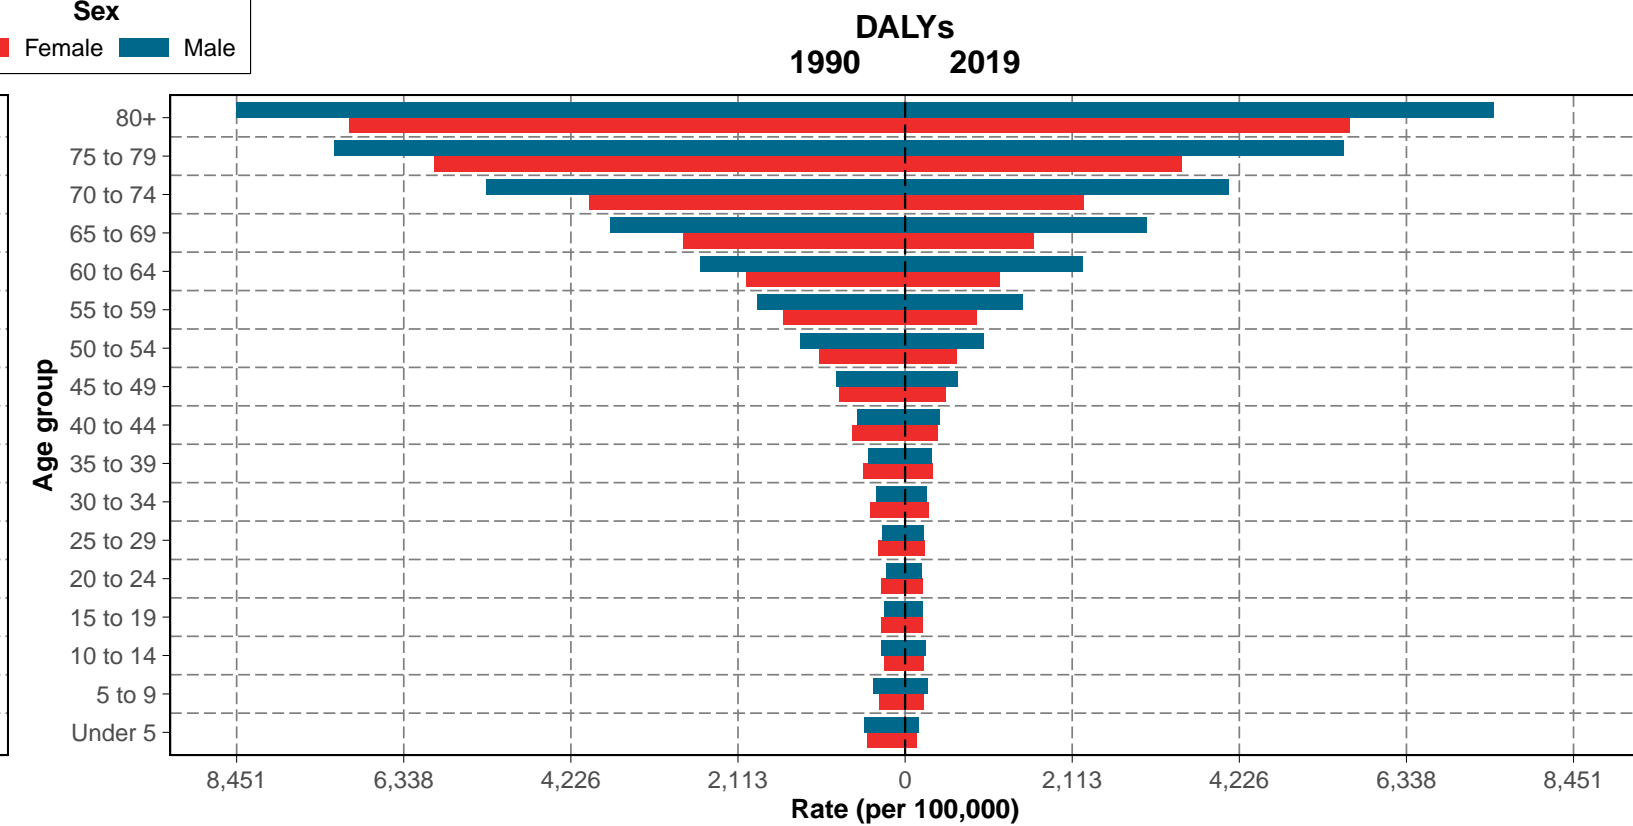

# Bushehr

**Incidence**  
1990 2019

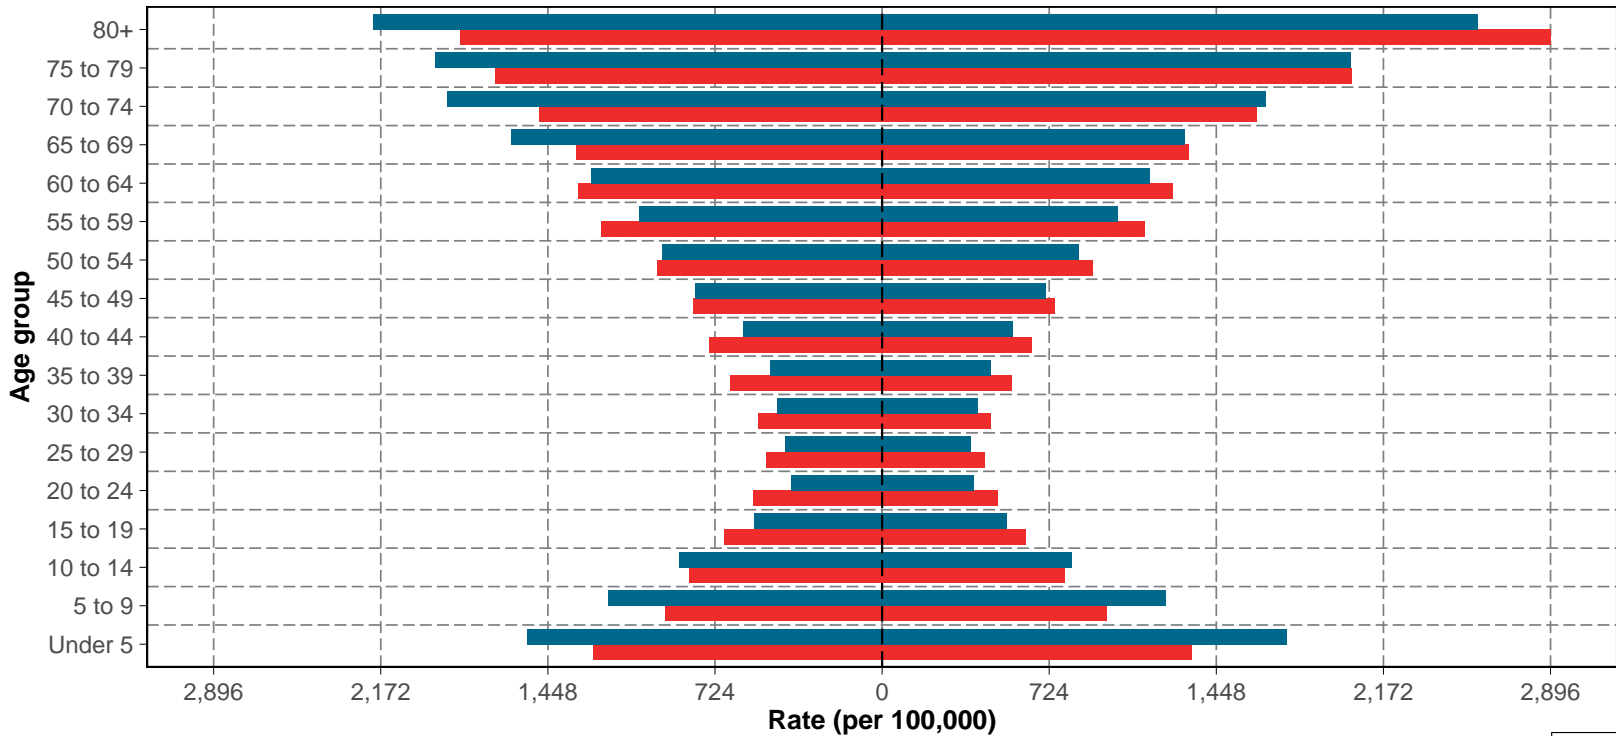

**Prevalence**  
1990 2019

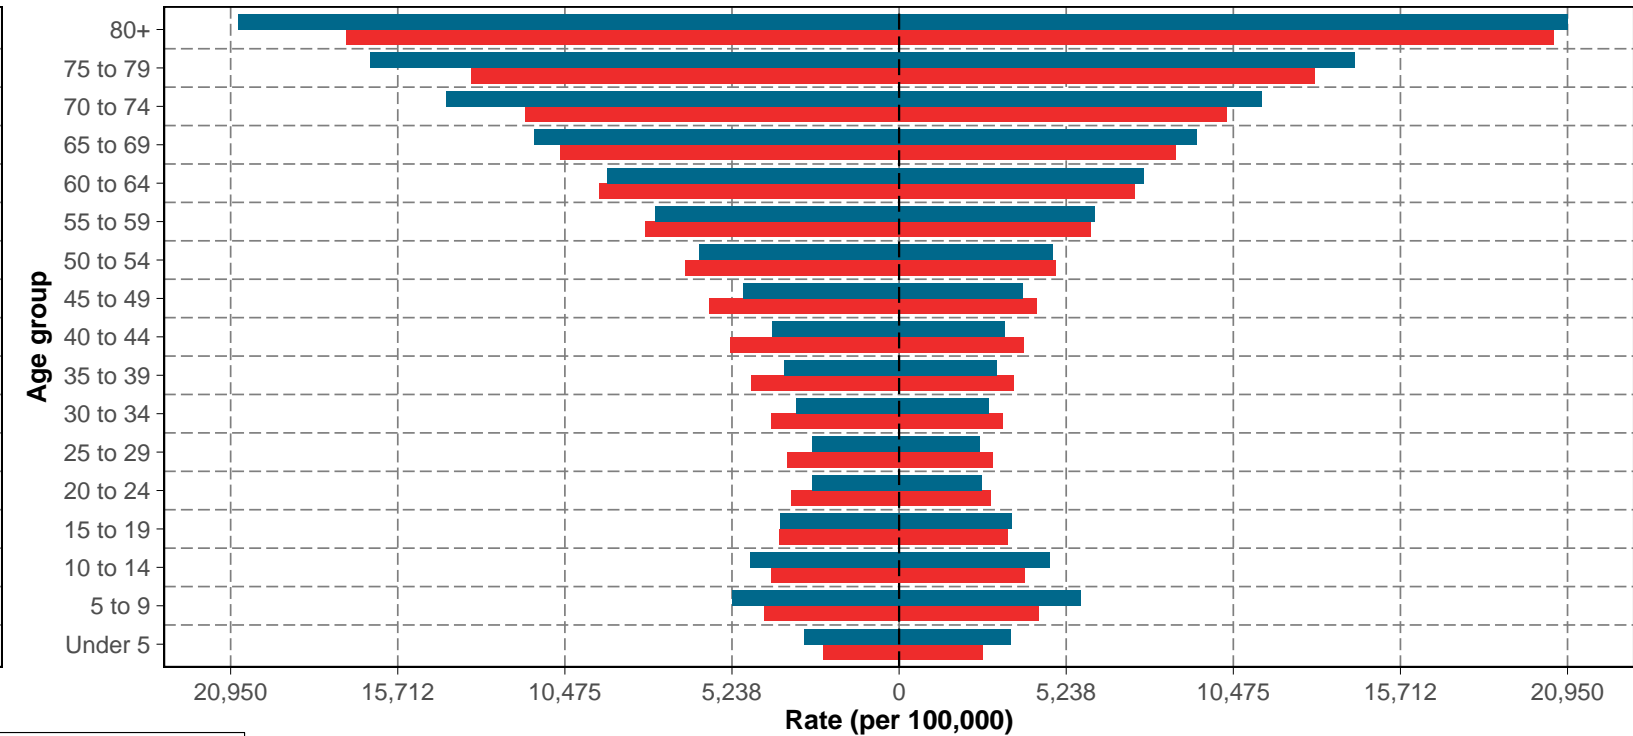

**Deaths**  
1990 2019

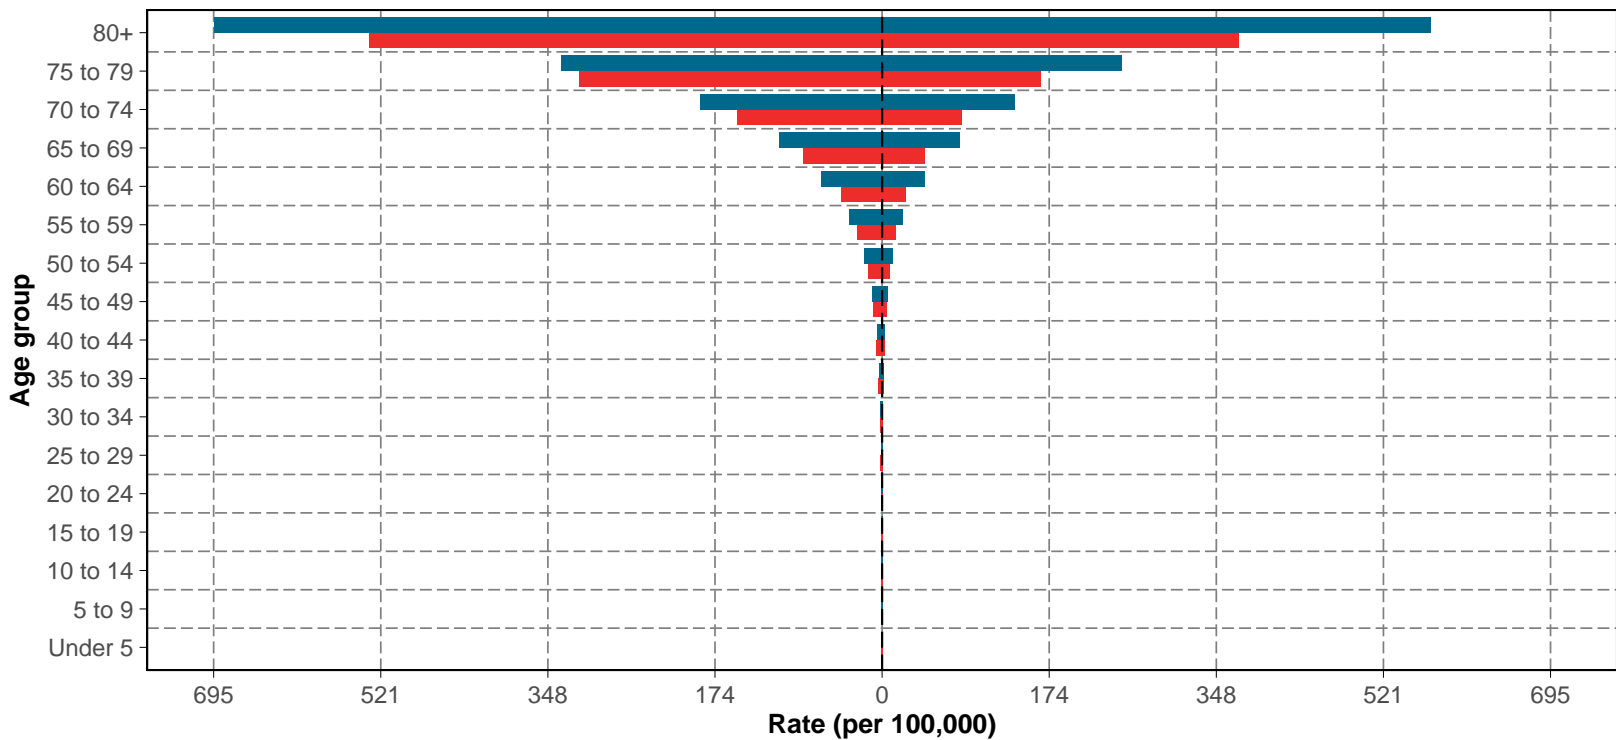

**DALYs**  
1990 2019

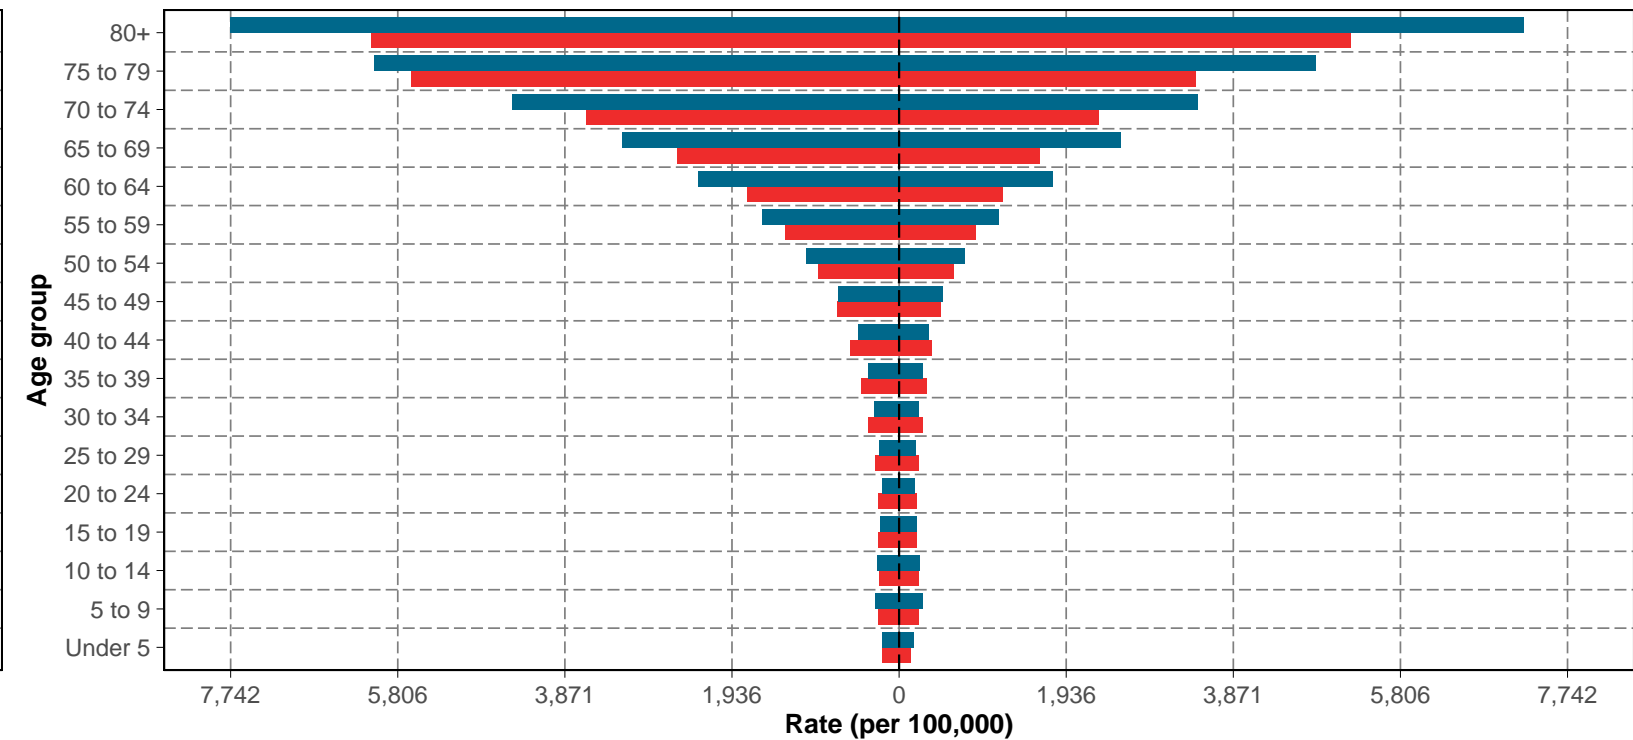

**Sex**  
Female Male

# Chahar Mahaal and Bakhtiari

**Incidence**  
1990 2019

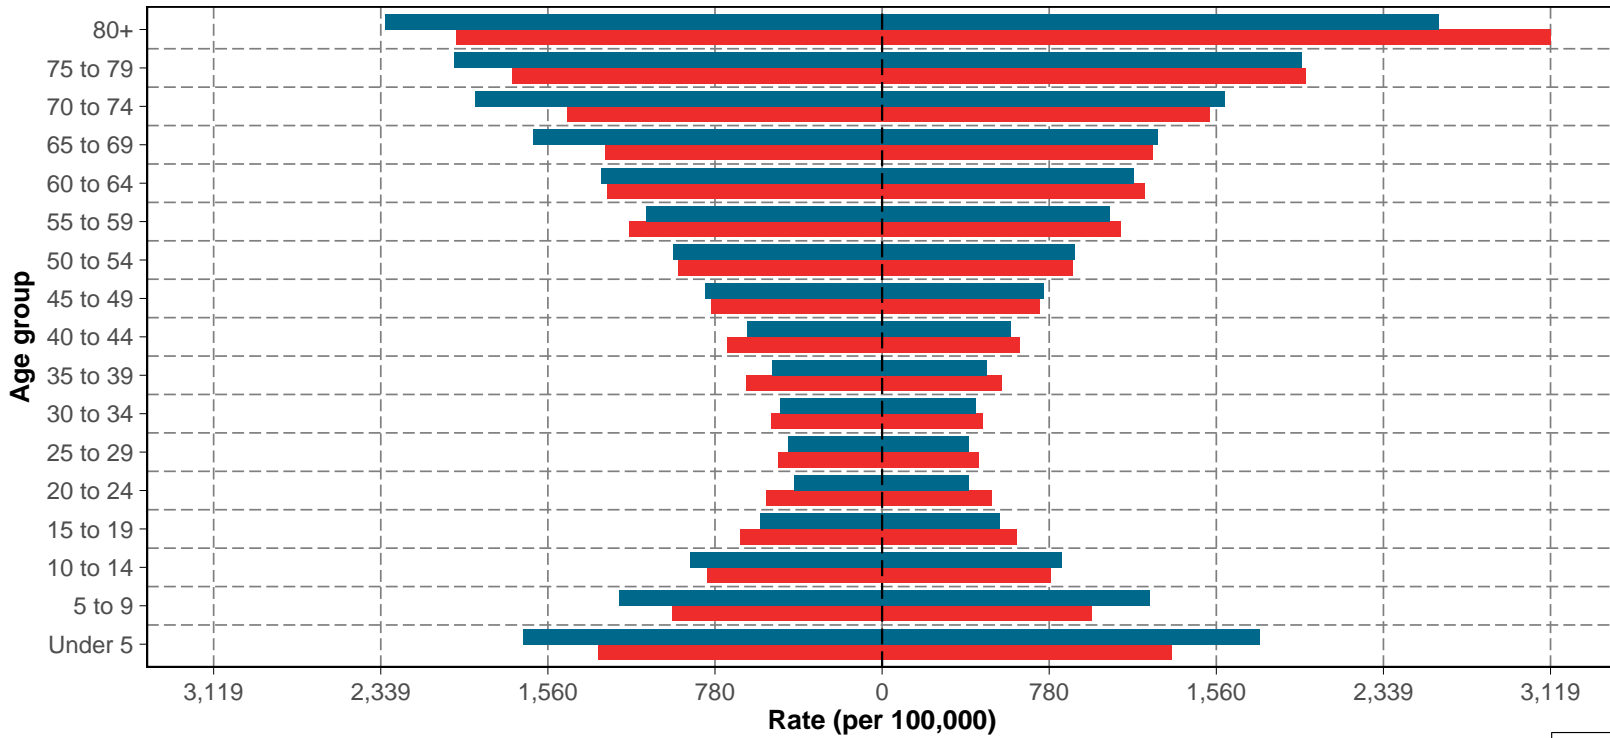

**Prevalence**  
1990 2019

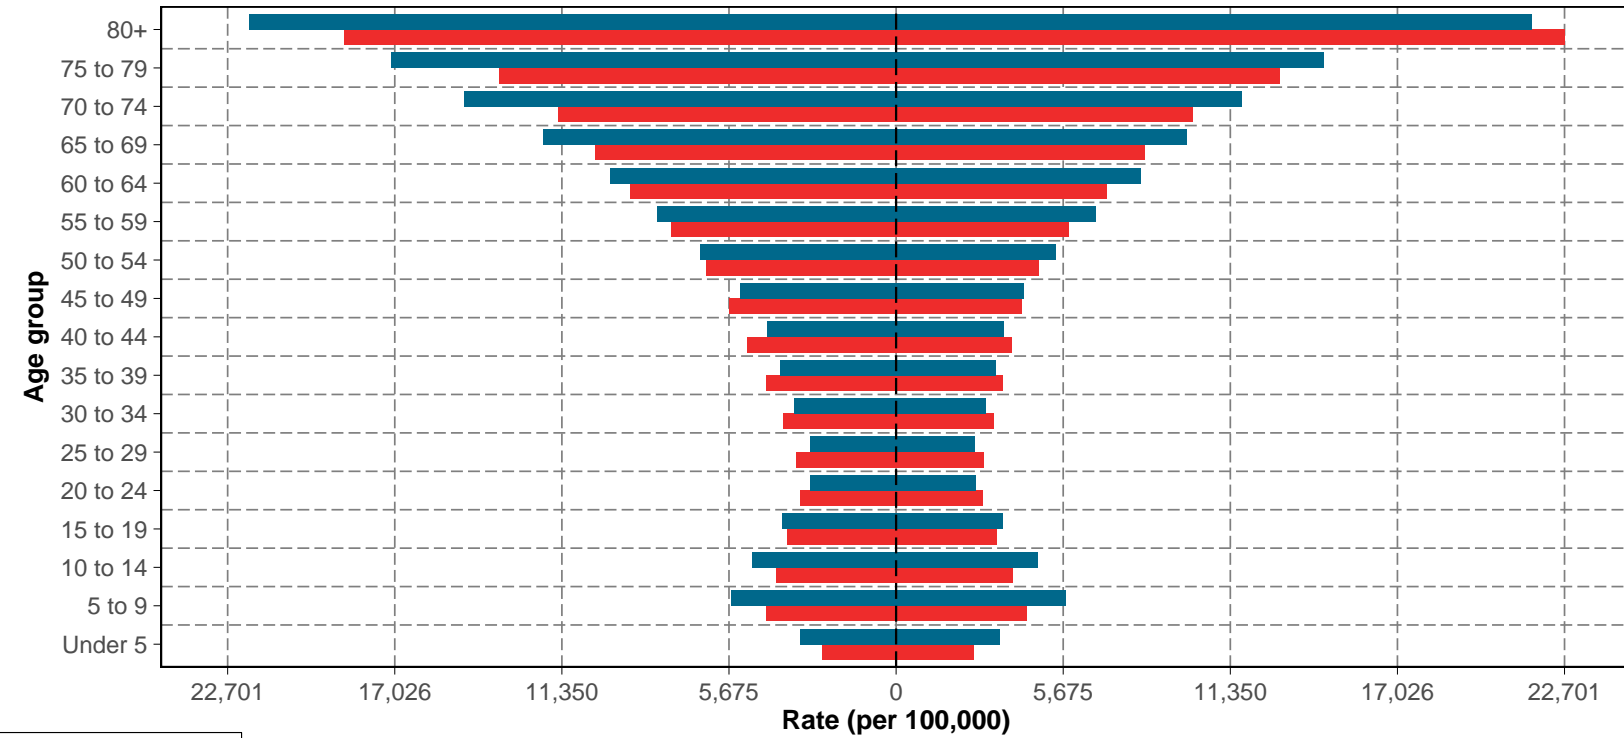

**Deaths**  
1990 2019

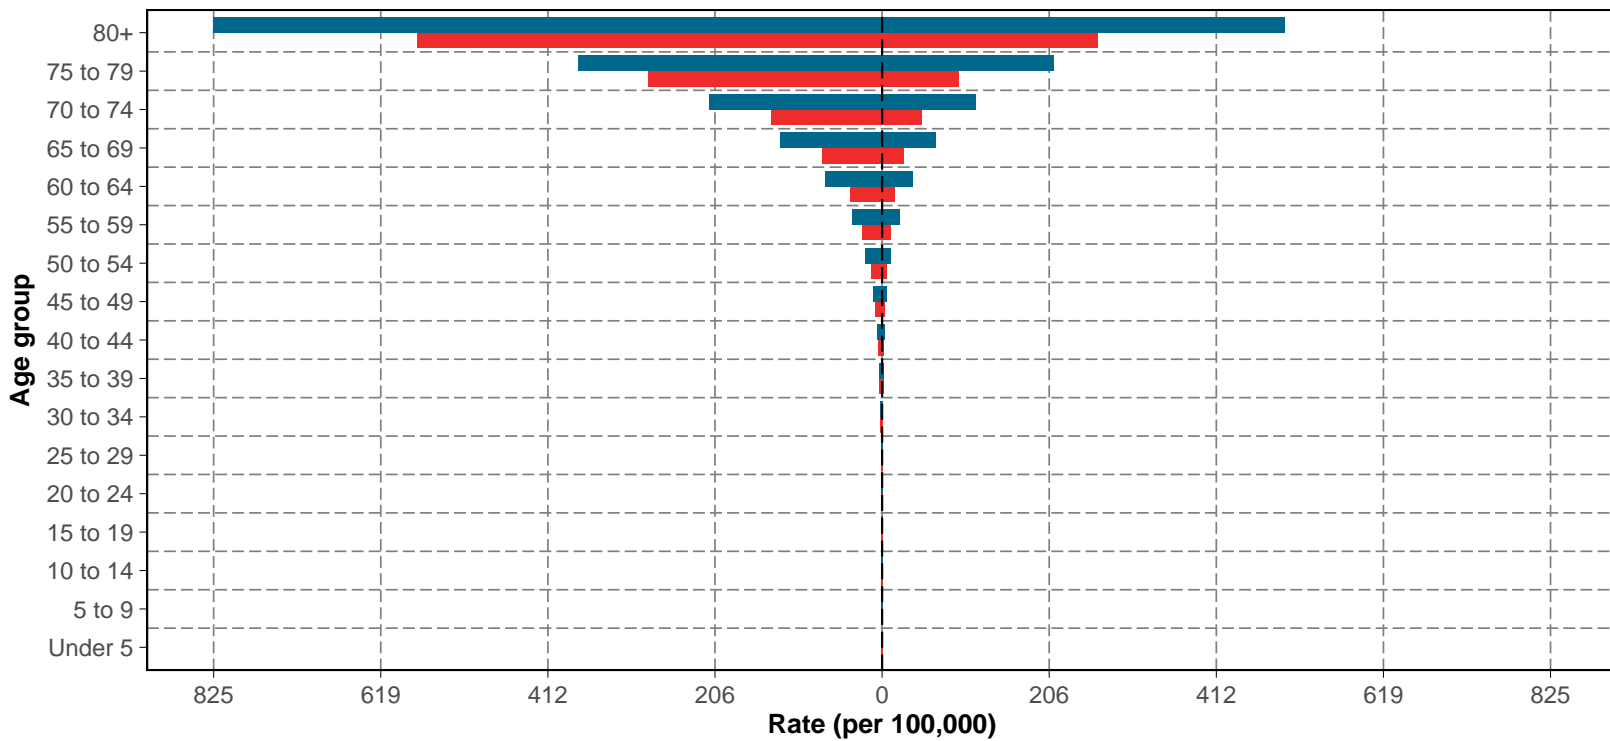

**DALYs**  
1990 2019

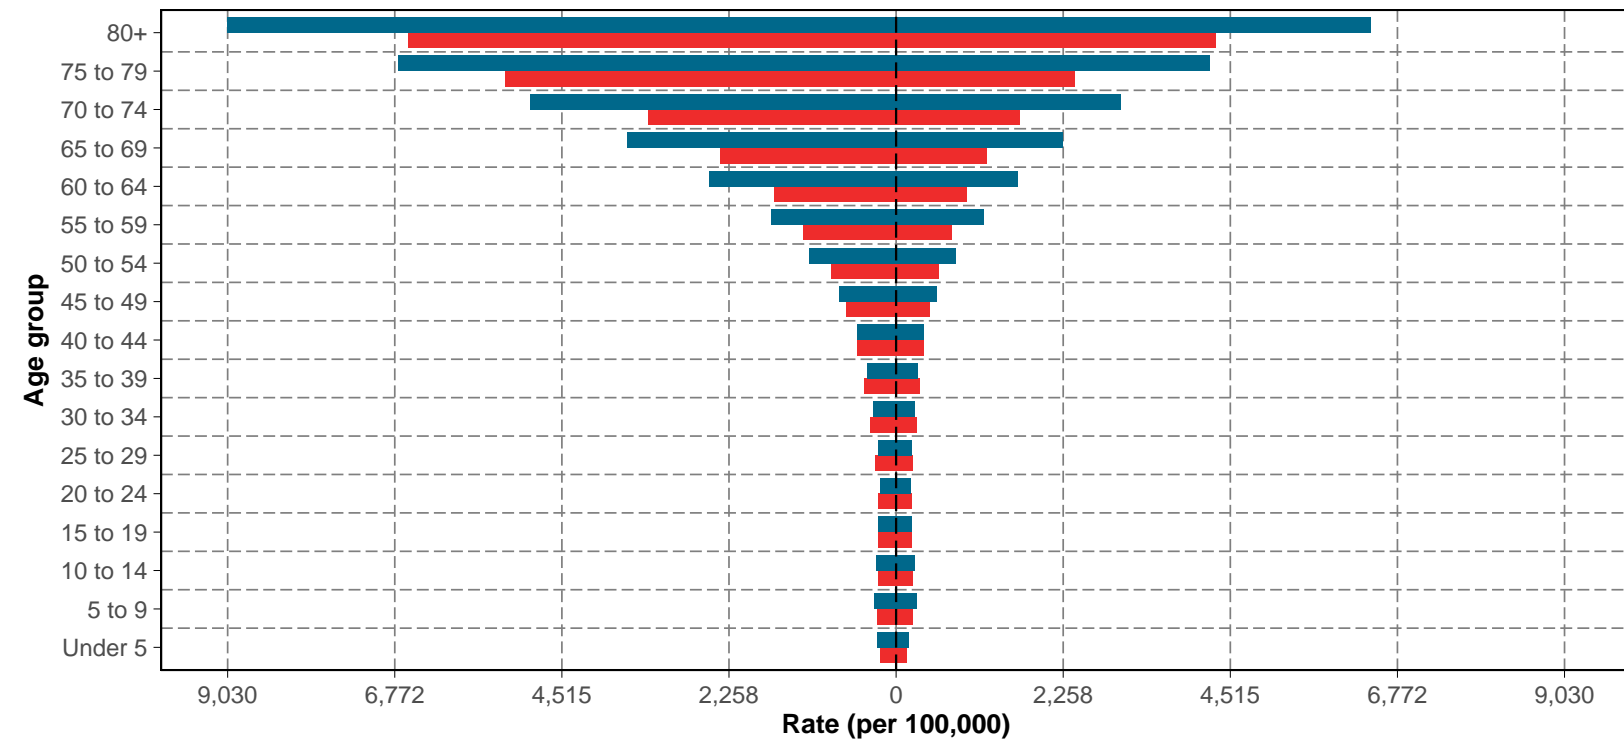

**Sex**  
Female Male

# East Azarbaijejan

**Incidence**  
1990 2019

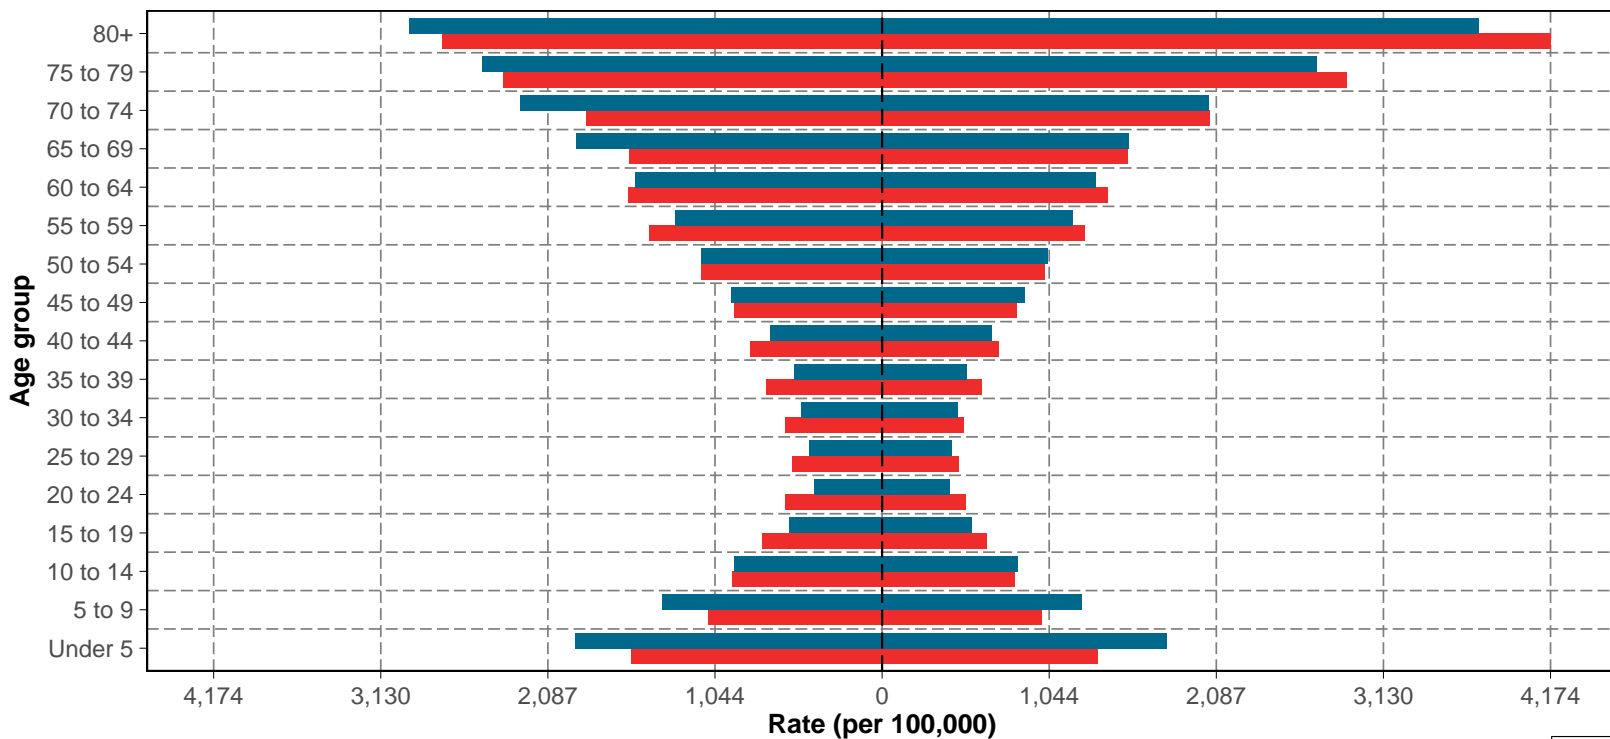

**Prevalence**  
1990 2019

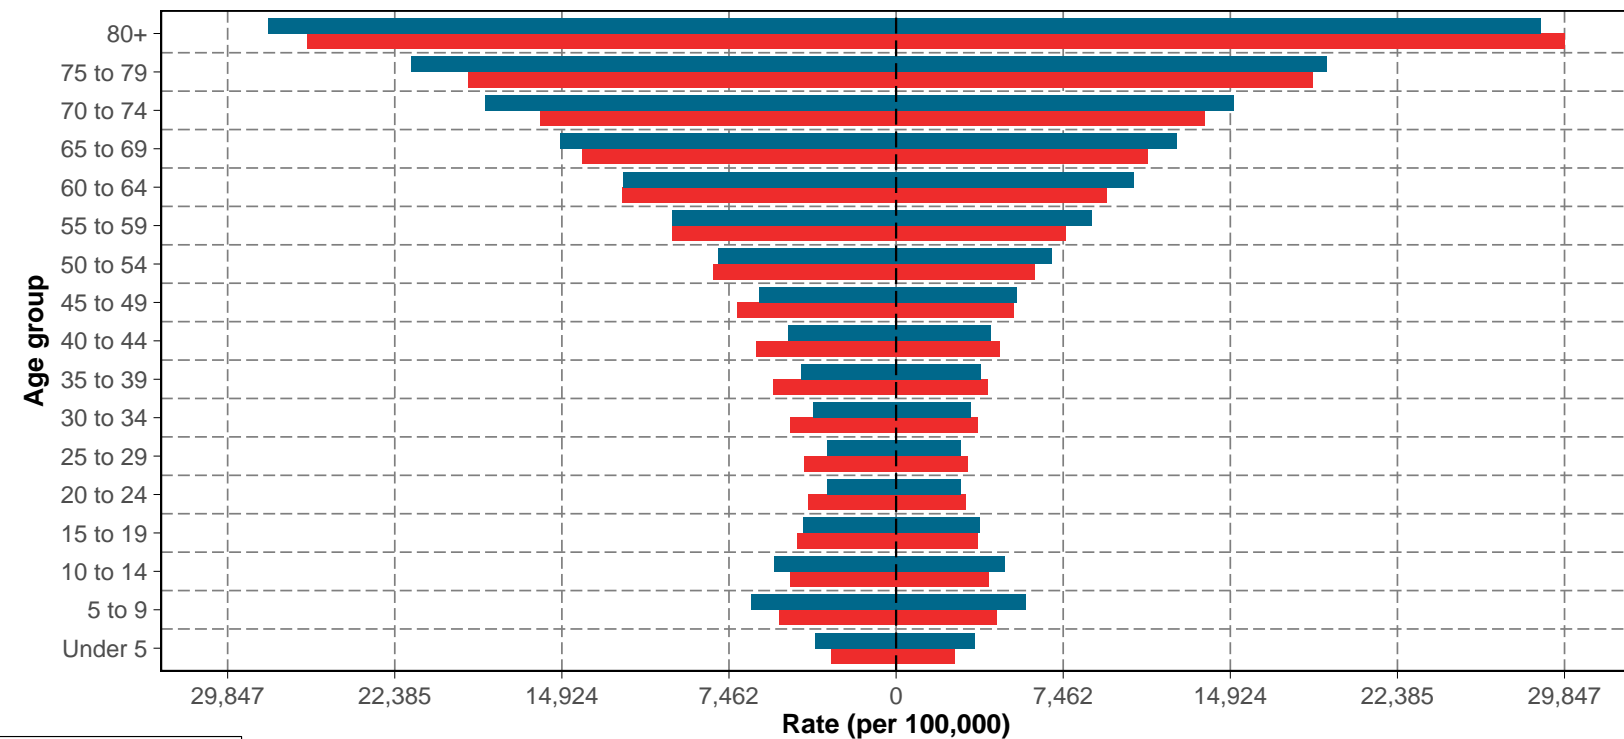

**Deaths**  
1990 2019

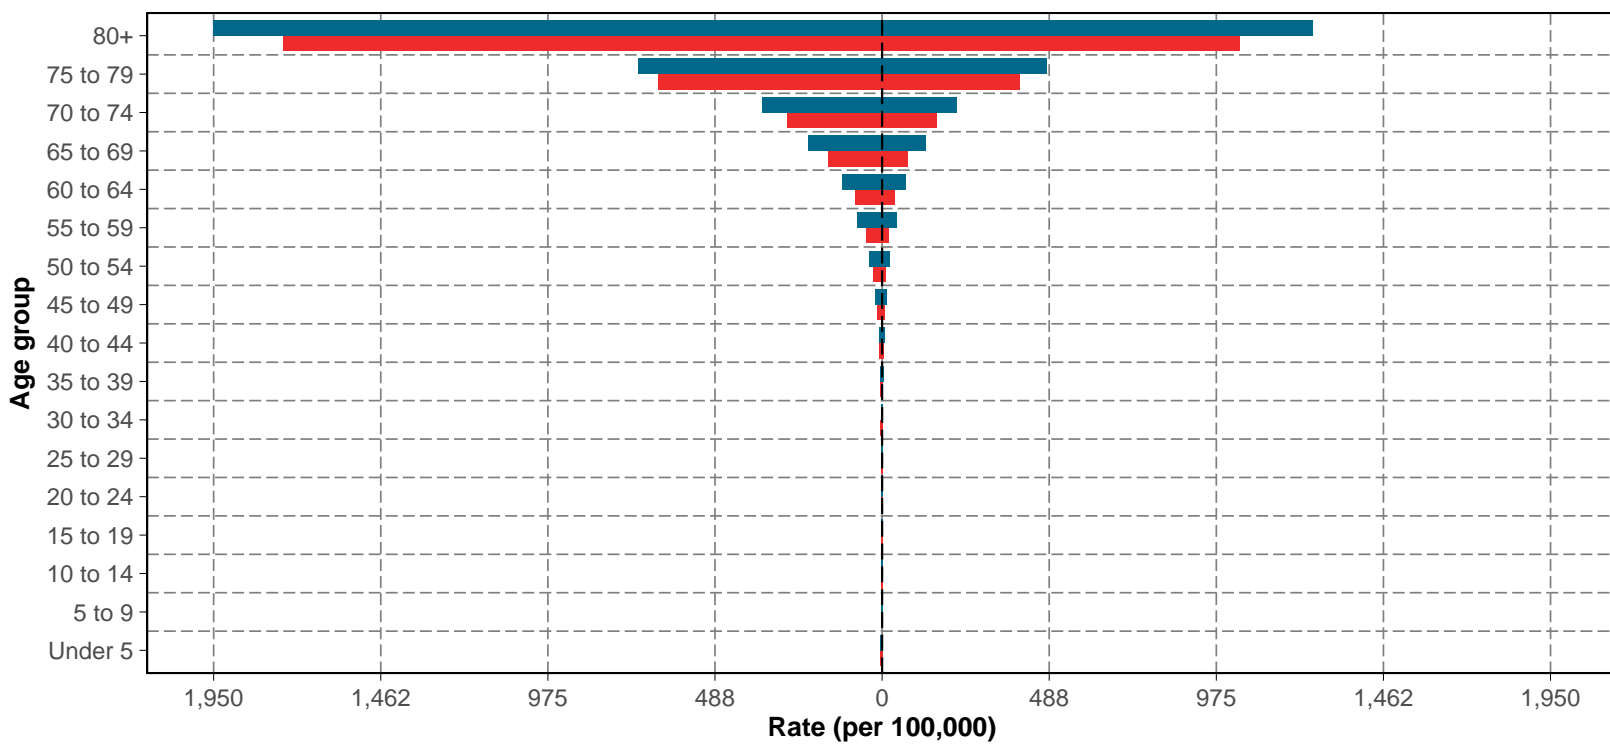

**DALYs**  
1990 2019

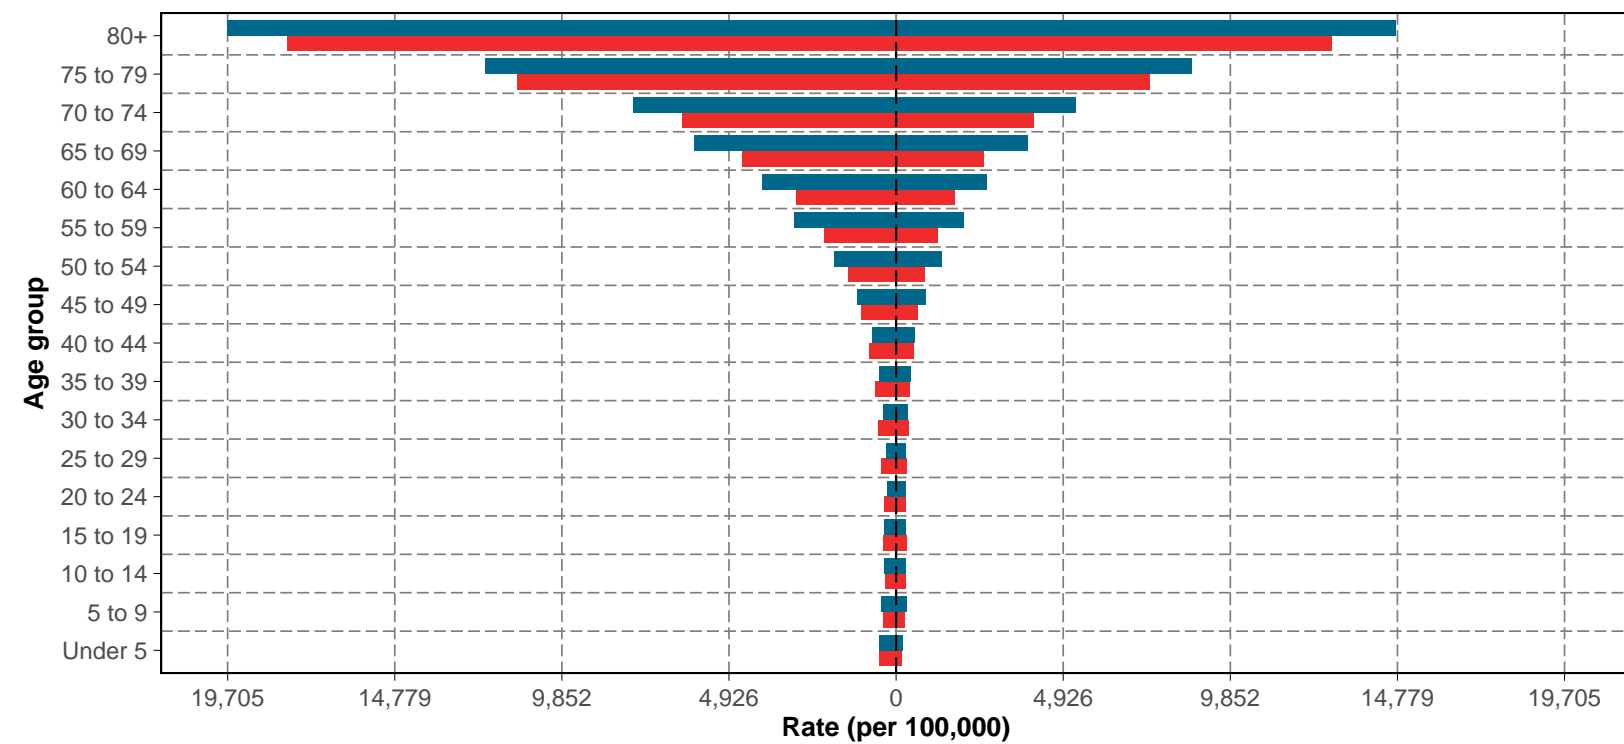

**Sex**  
Female Male

# Fars

**Incidence**  
1990 2019

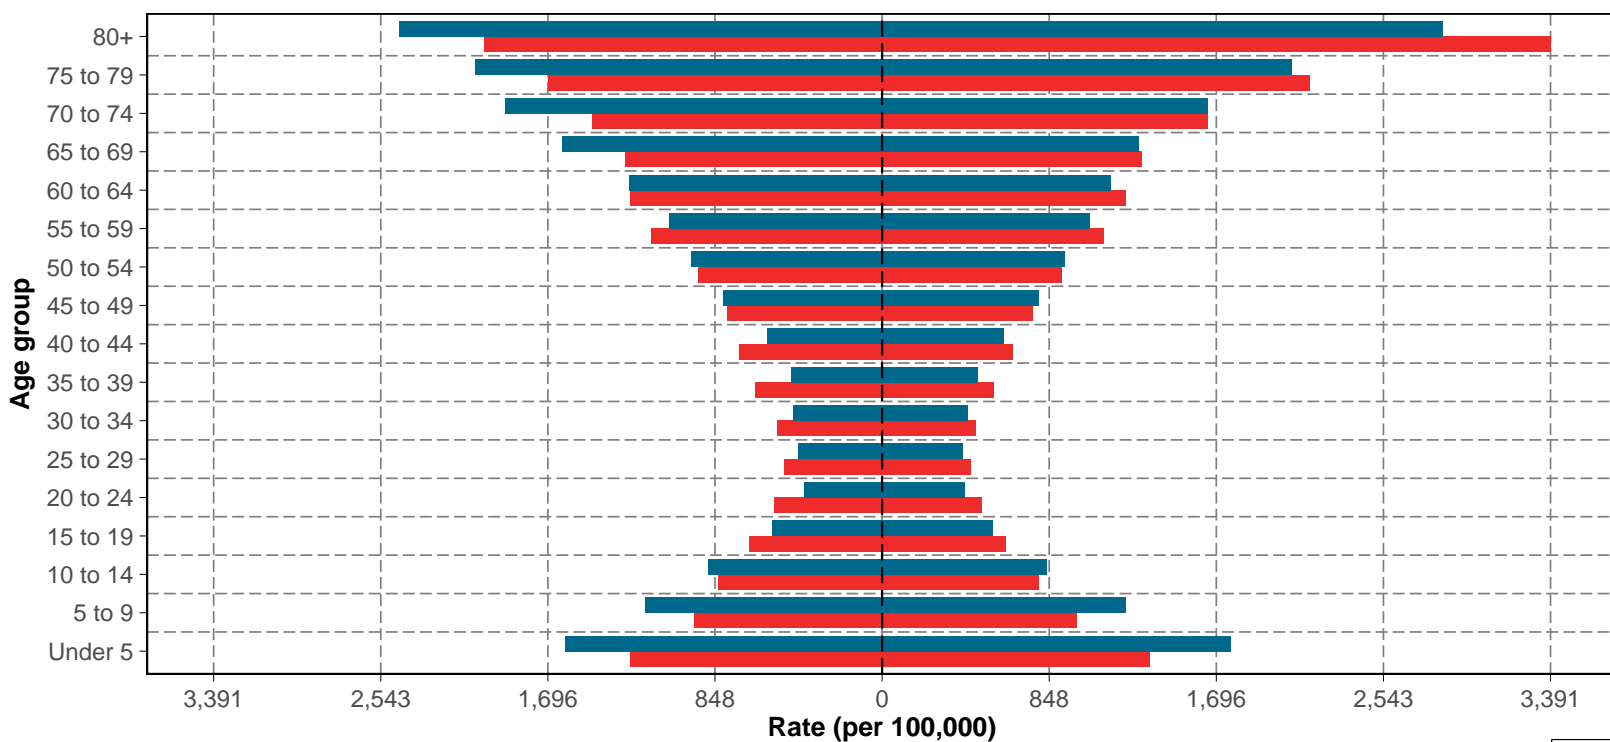

**Prevalence**  
1990 2019

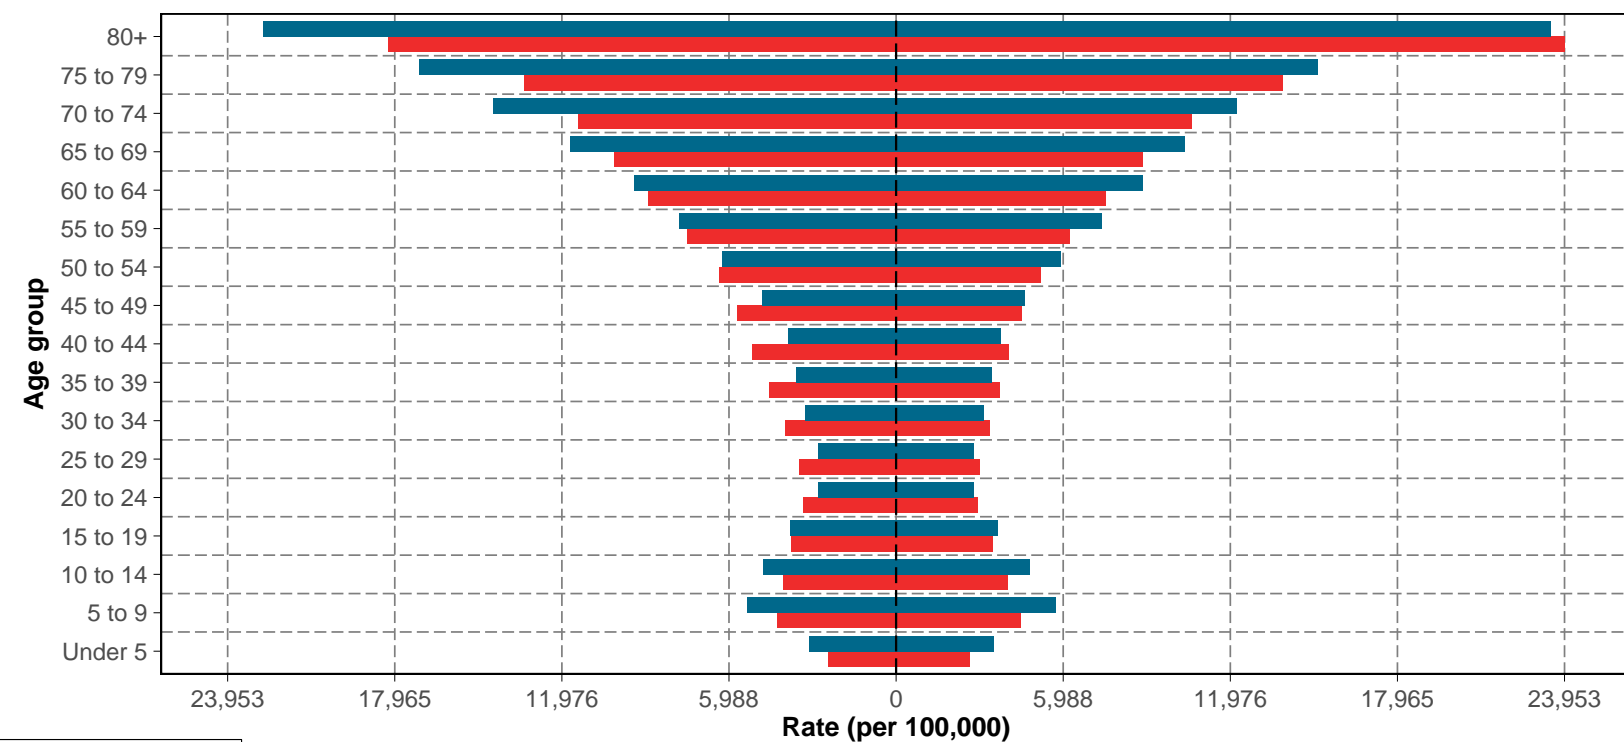

**Deaths**  
1990 2019

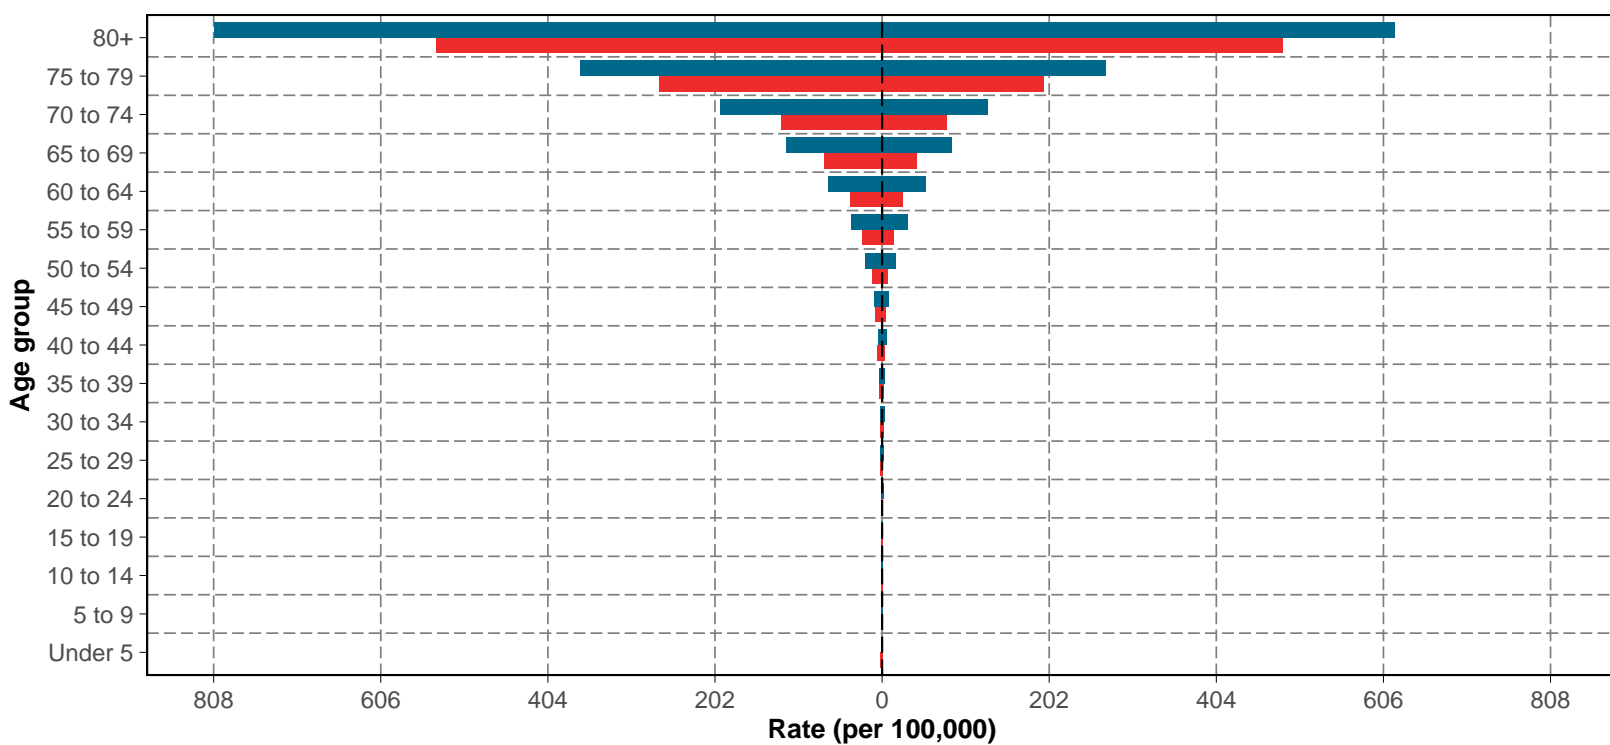

**DALYs**  
1990 2019

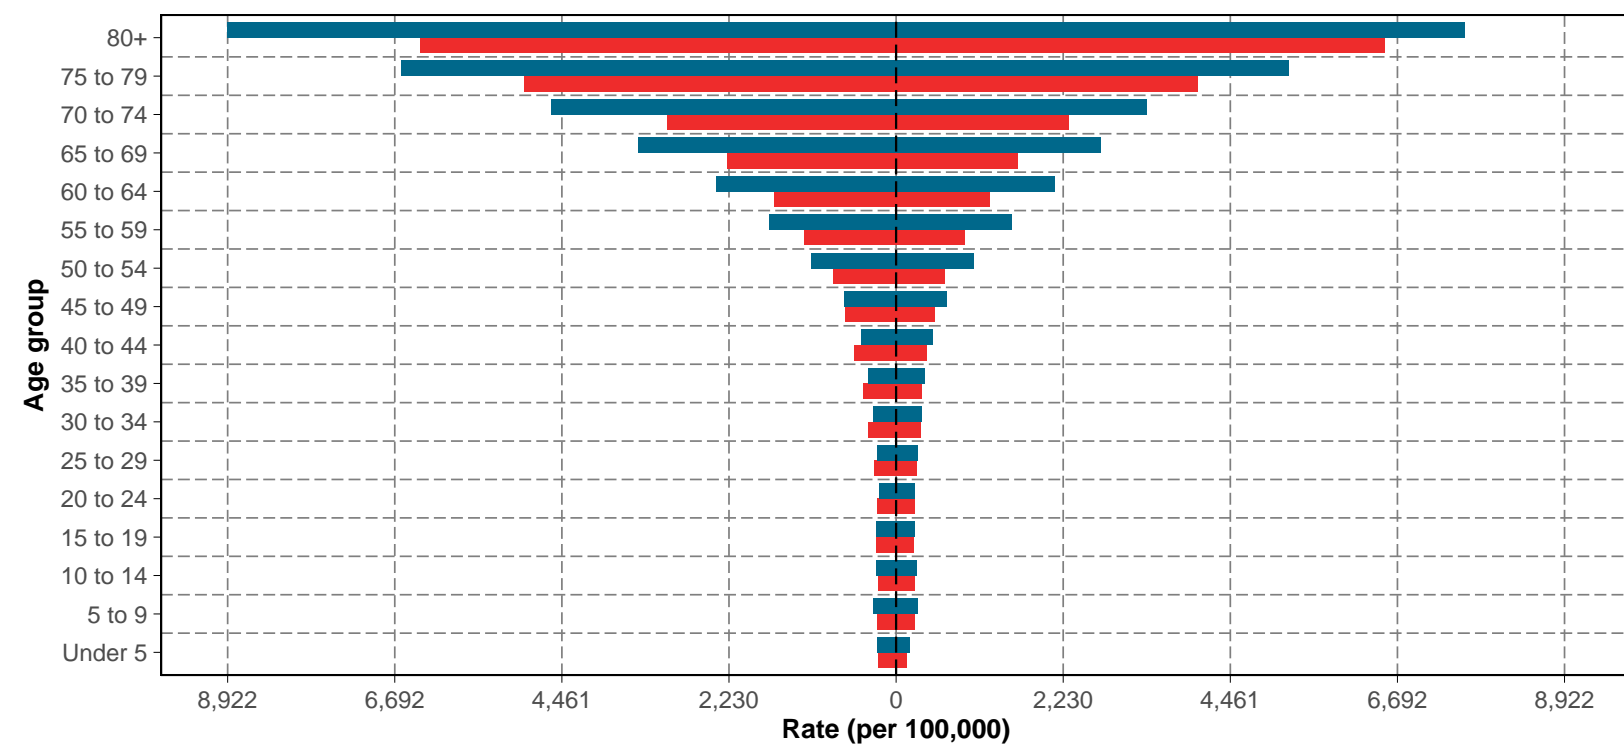

**Sex**  
Female Male

# Gilan

### Incidence 1990 2019

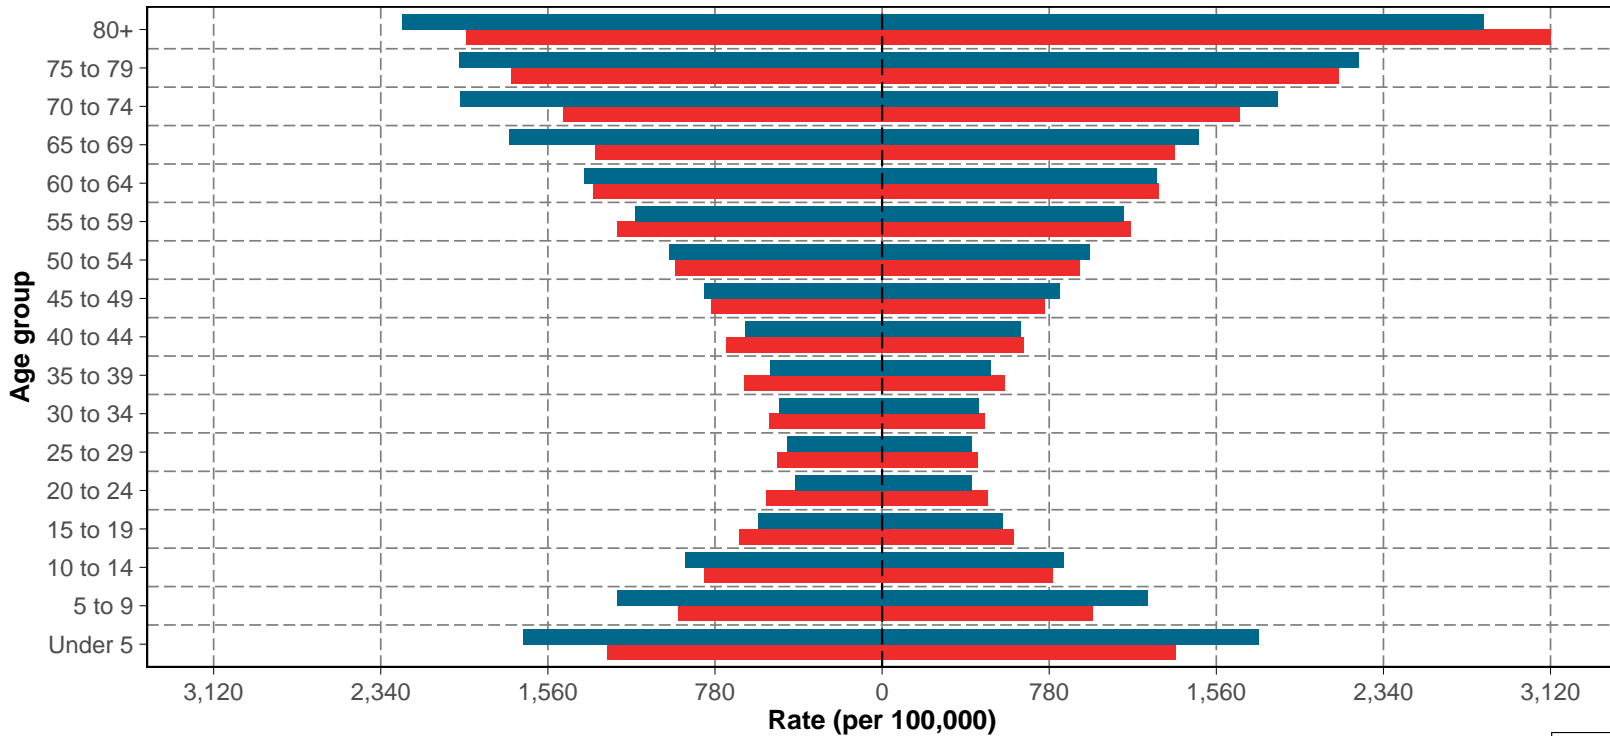

### Prevalence 1990 2019

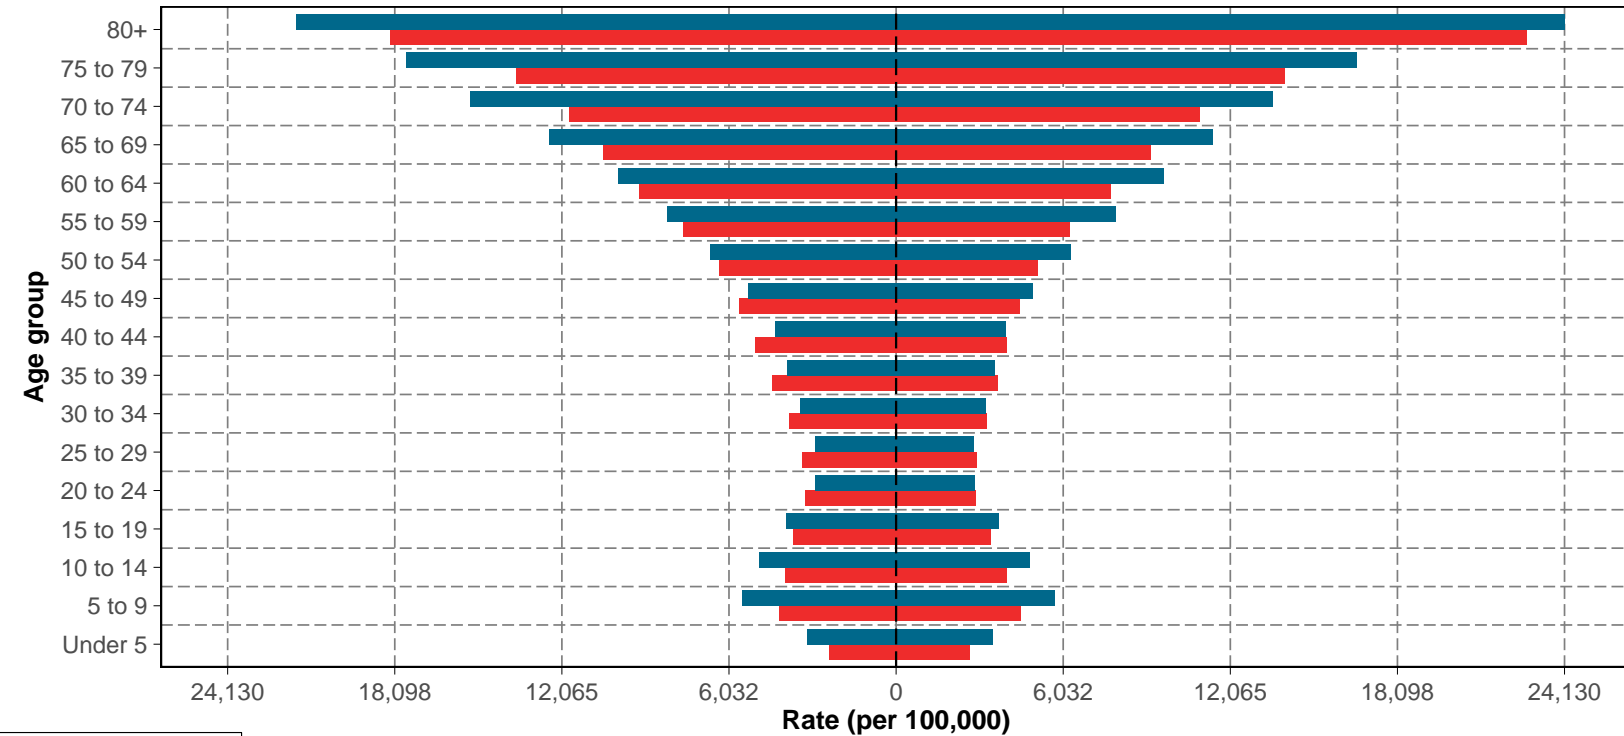

### Deaths 1990 2019

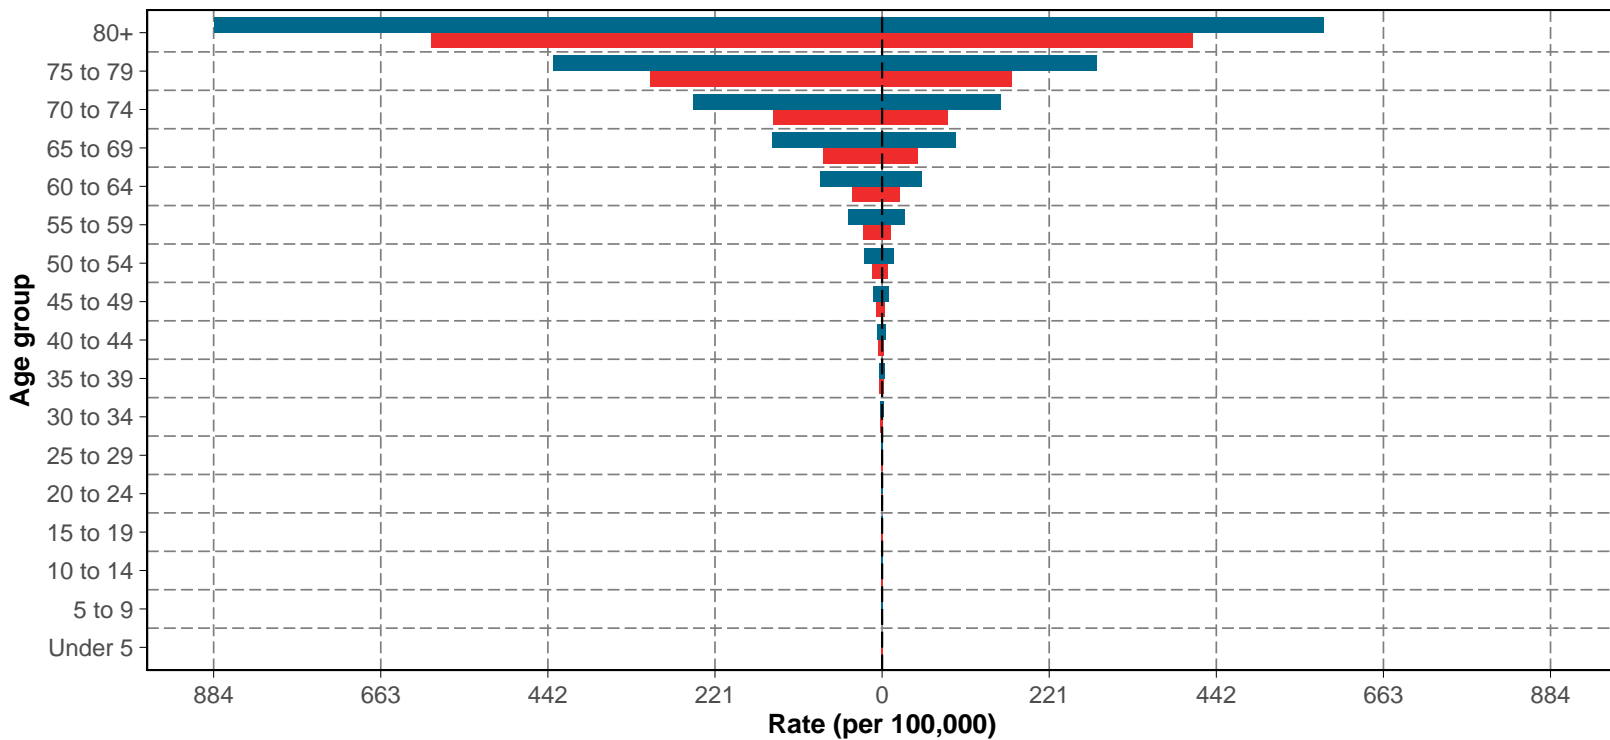

### DALYs 1990 2019

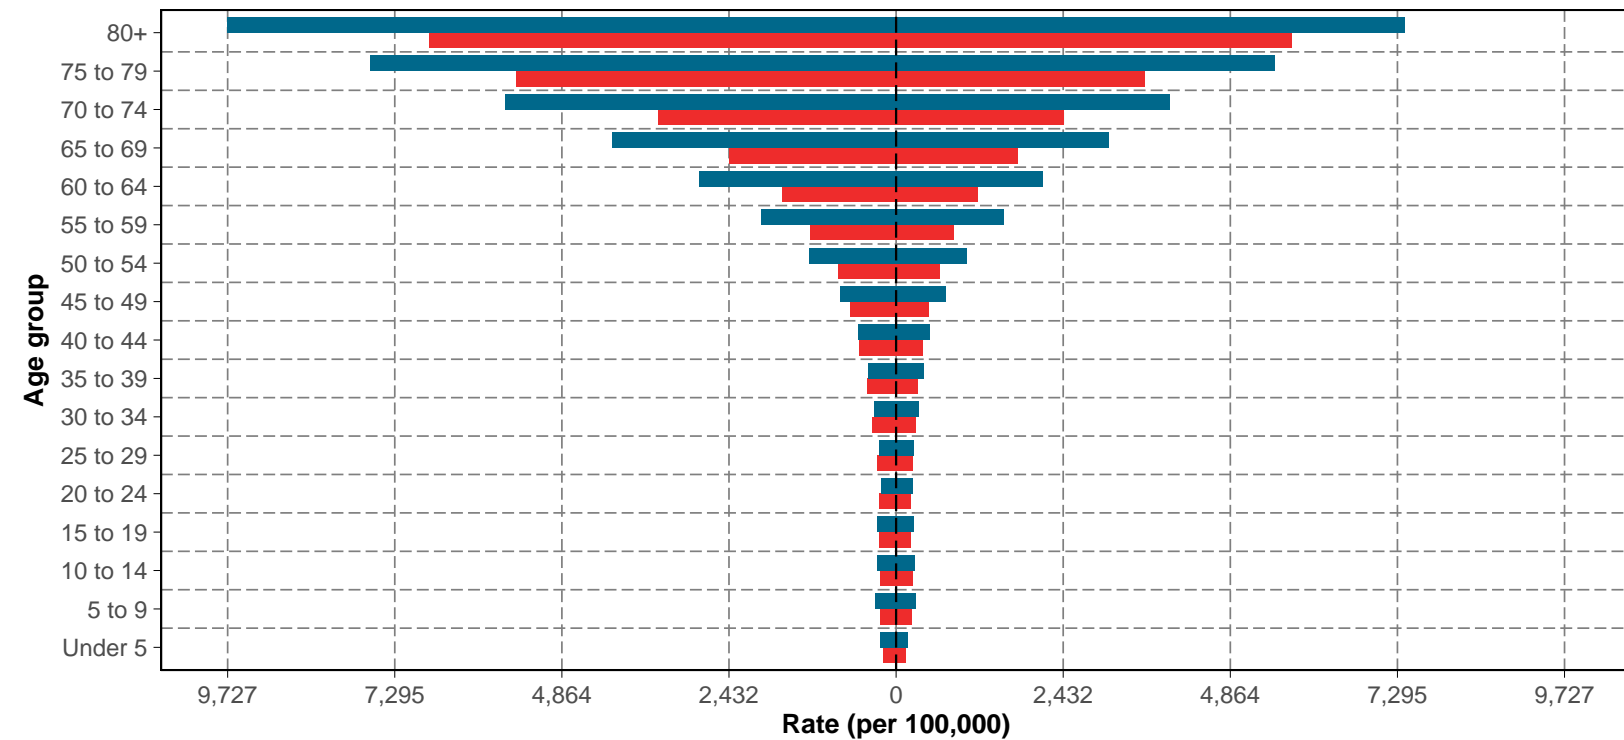

**Sex**  
Female Male

# Golestan

**Incidence**  
1990 2019

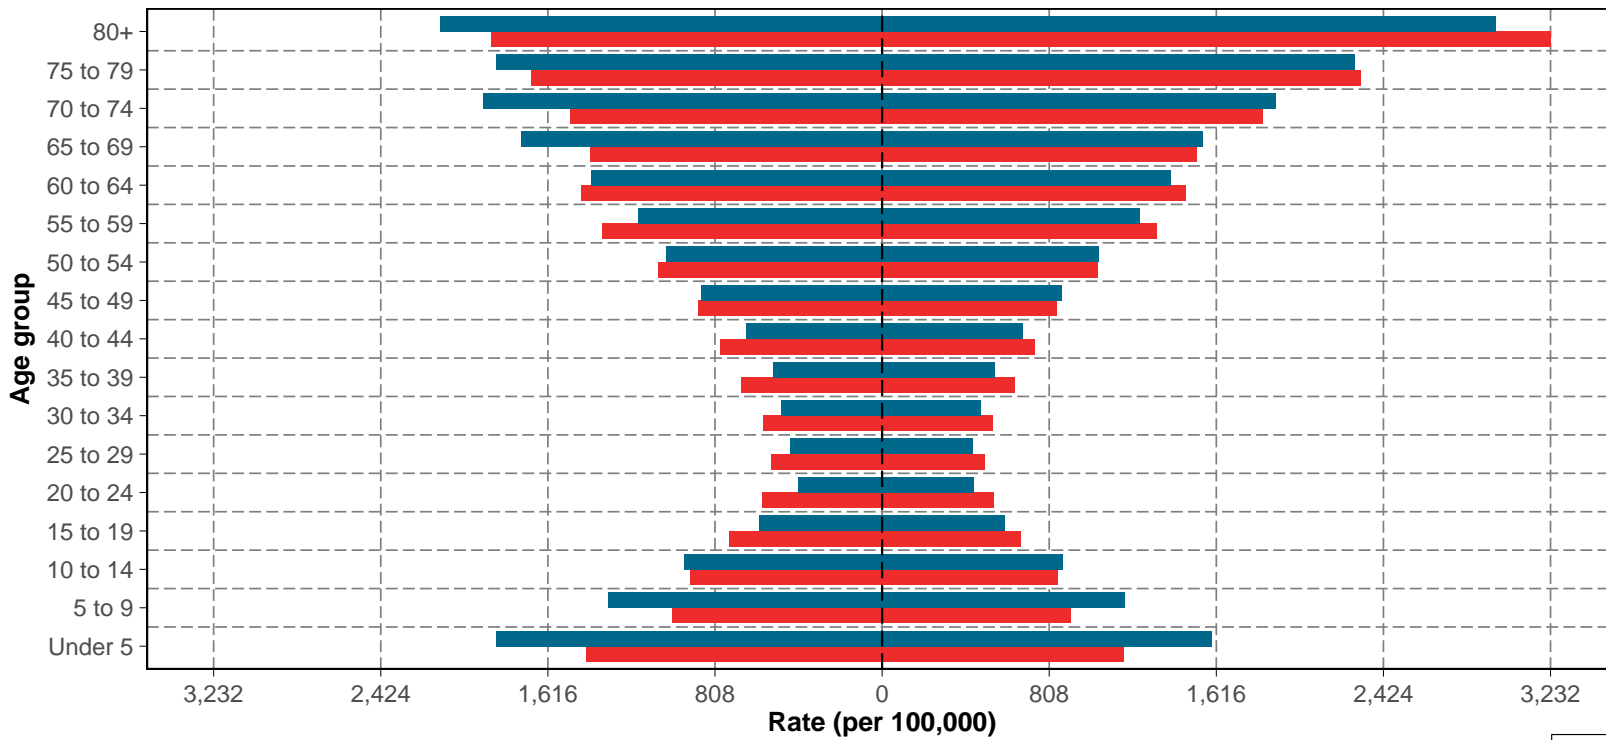

**Prevalence**  
1990 2019

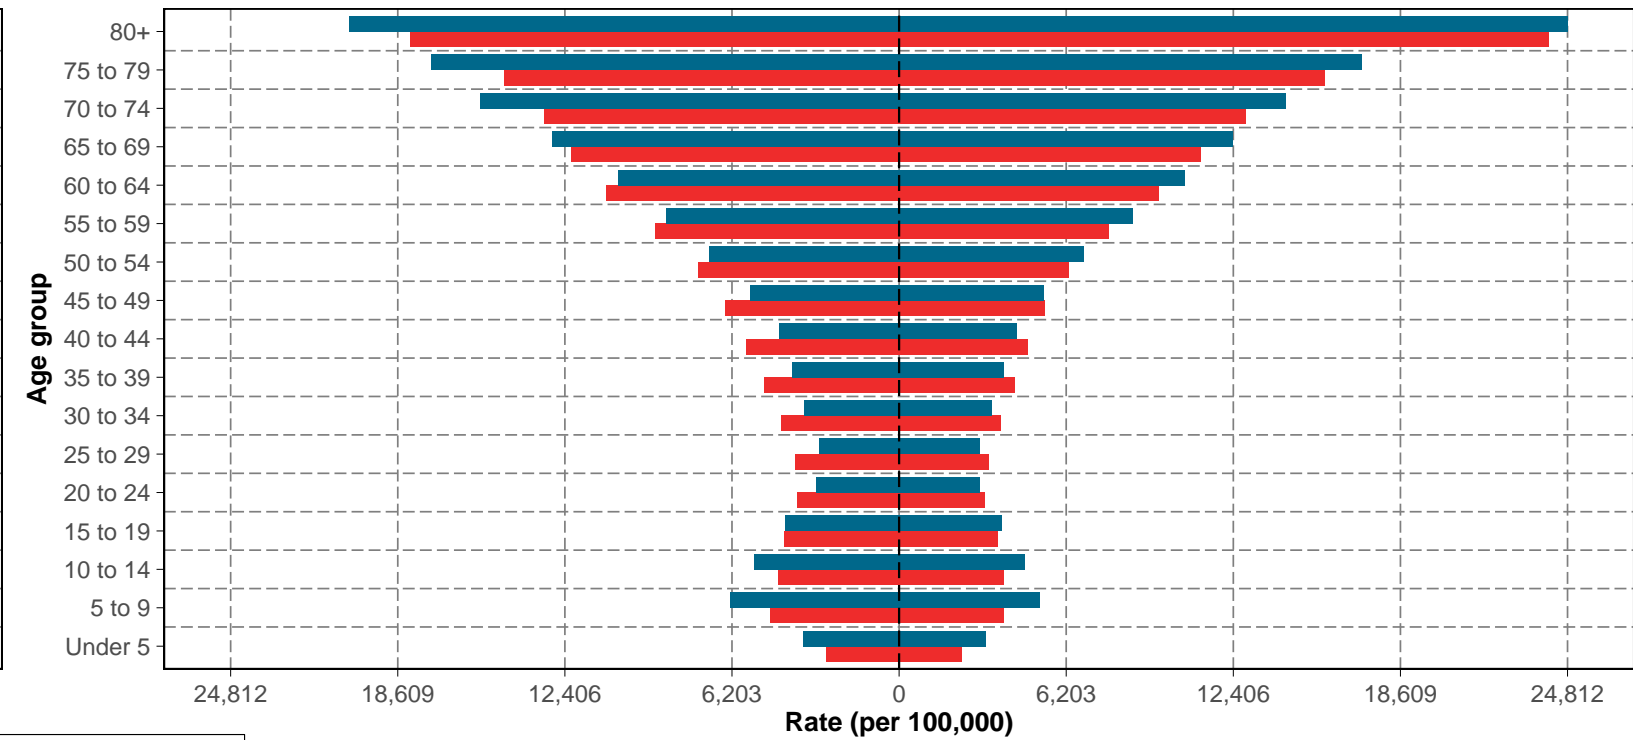

**Deaths**  
1990 2019

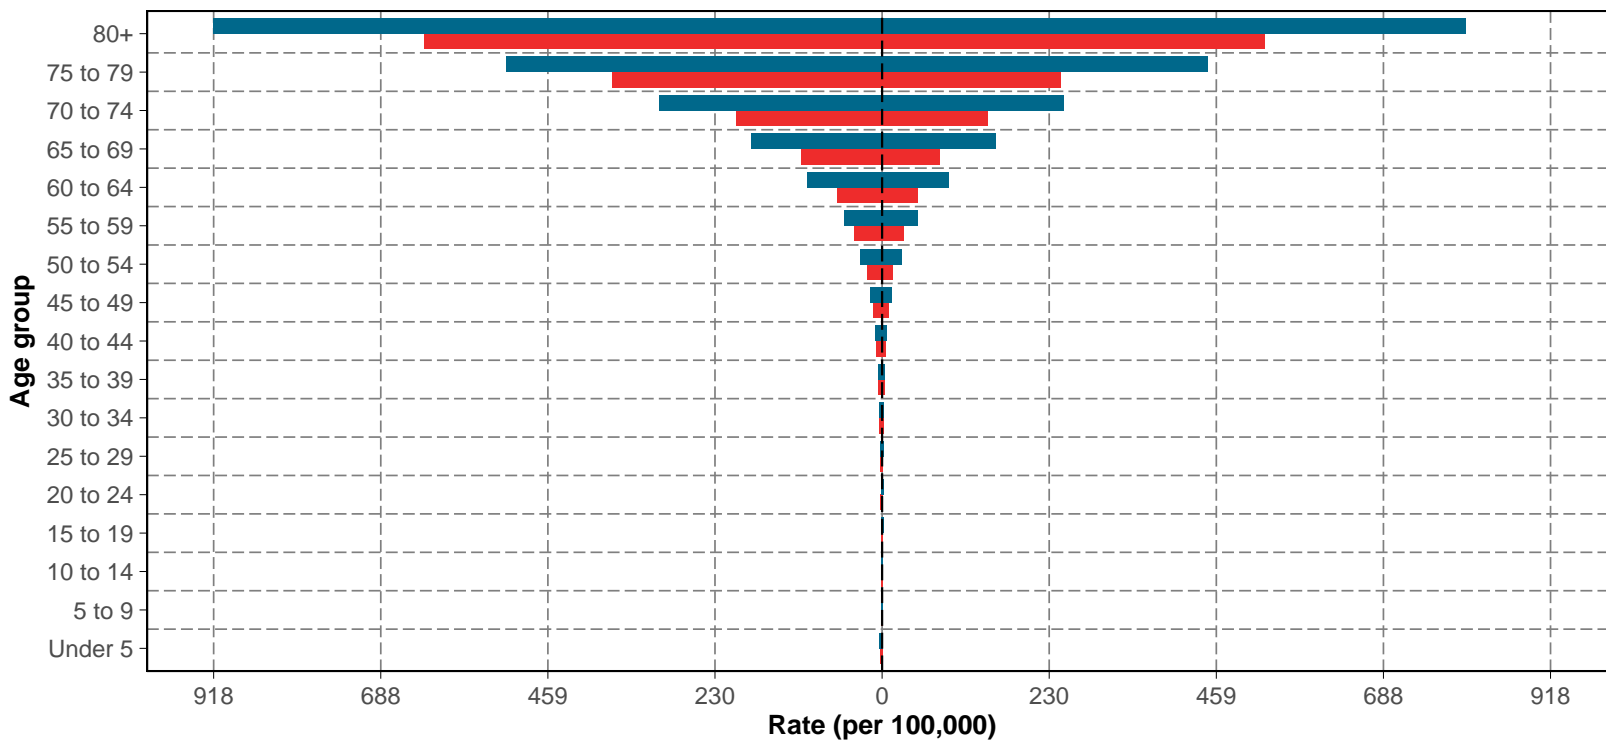

**DALYs**  
1990 2019

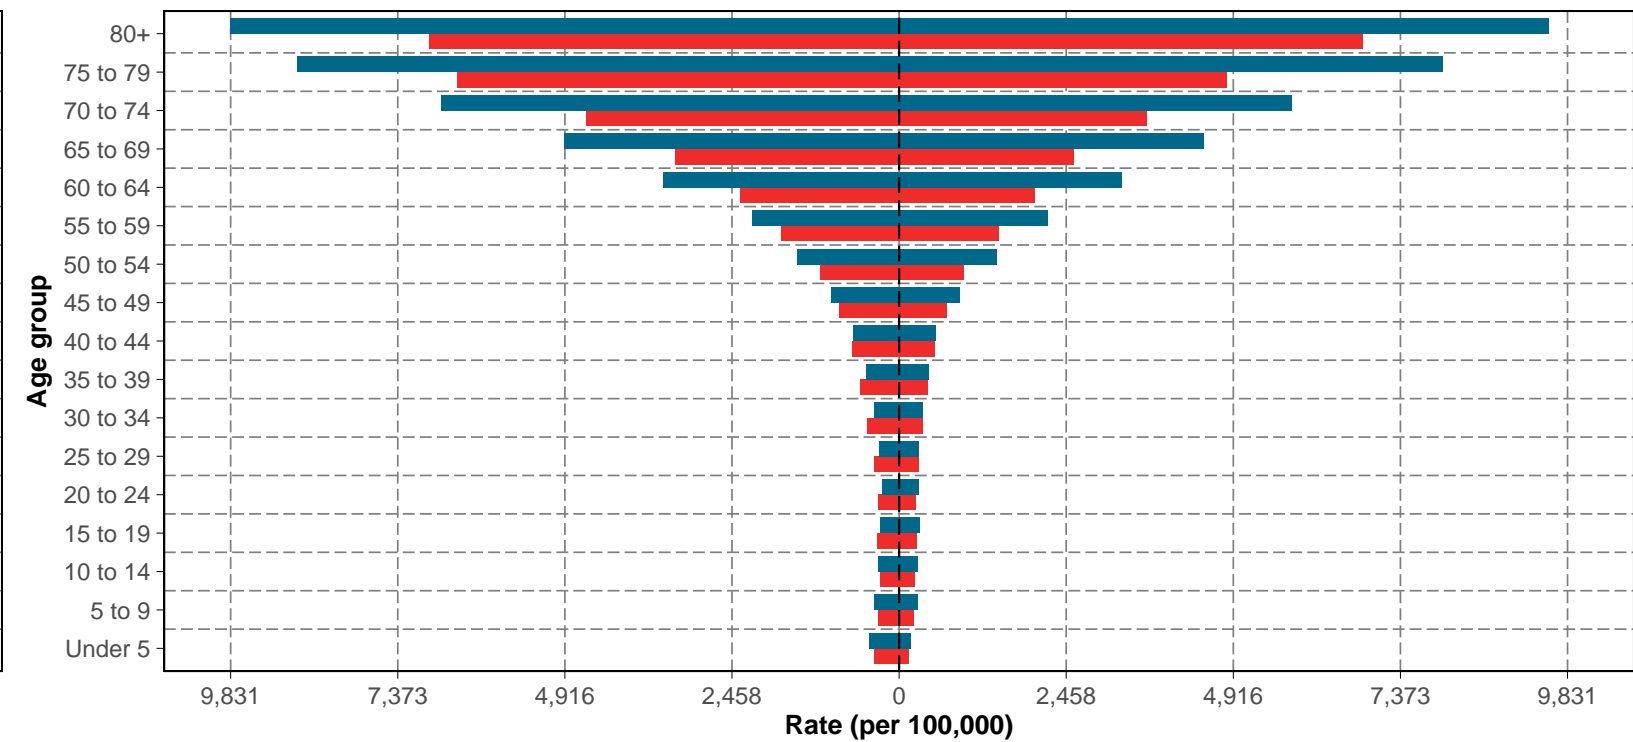

**Sex**  
Female Male



# Hamadan

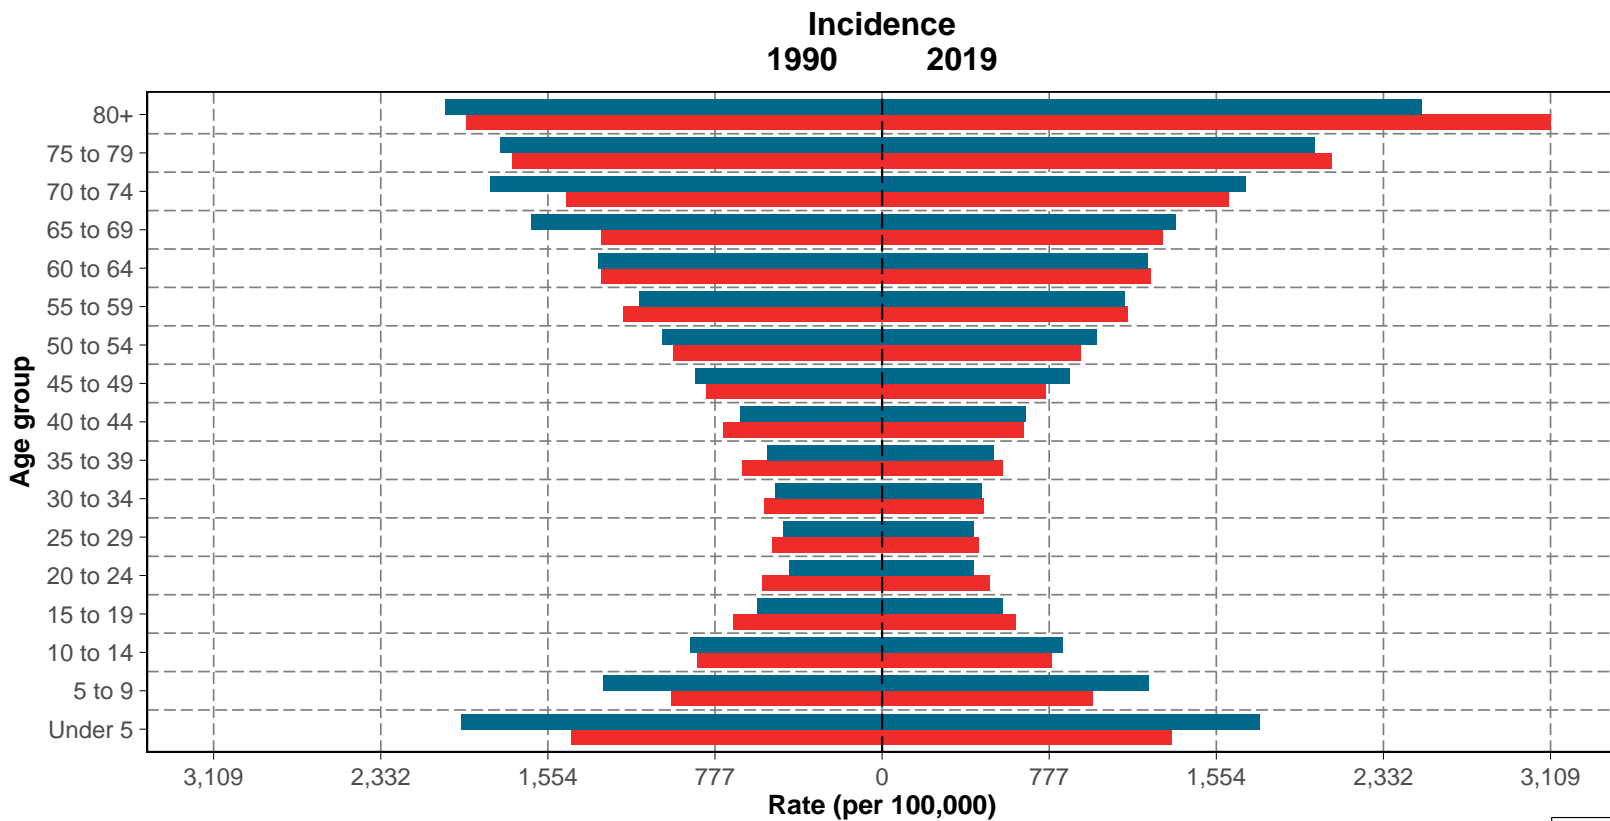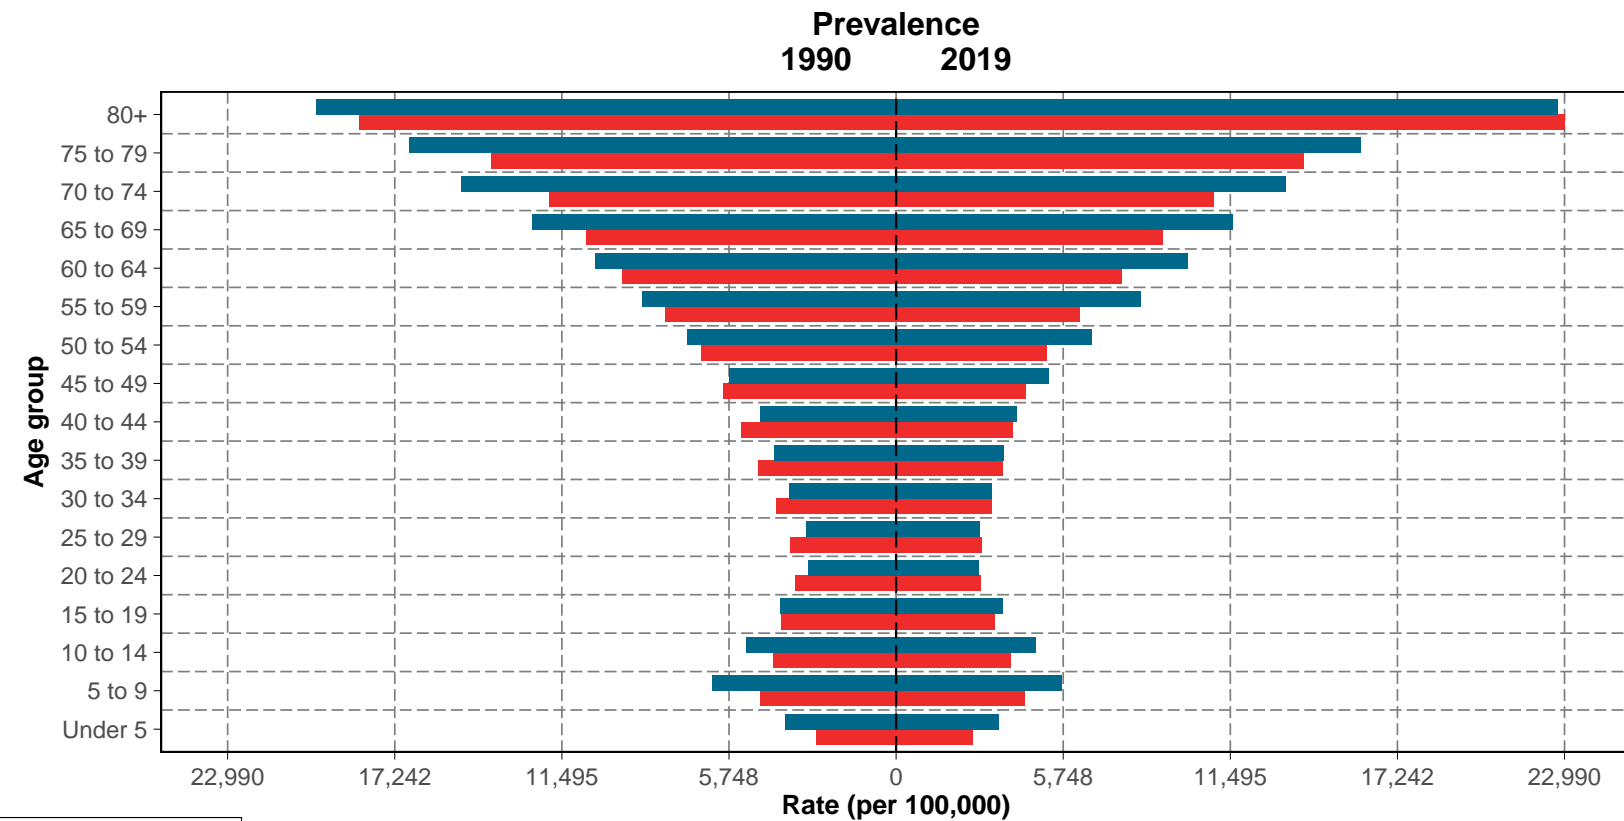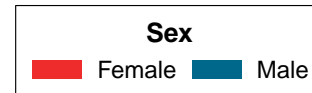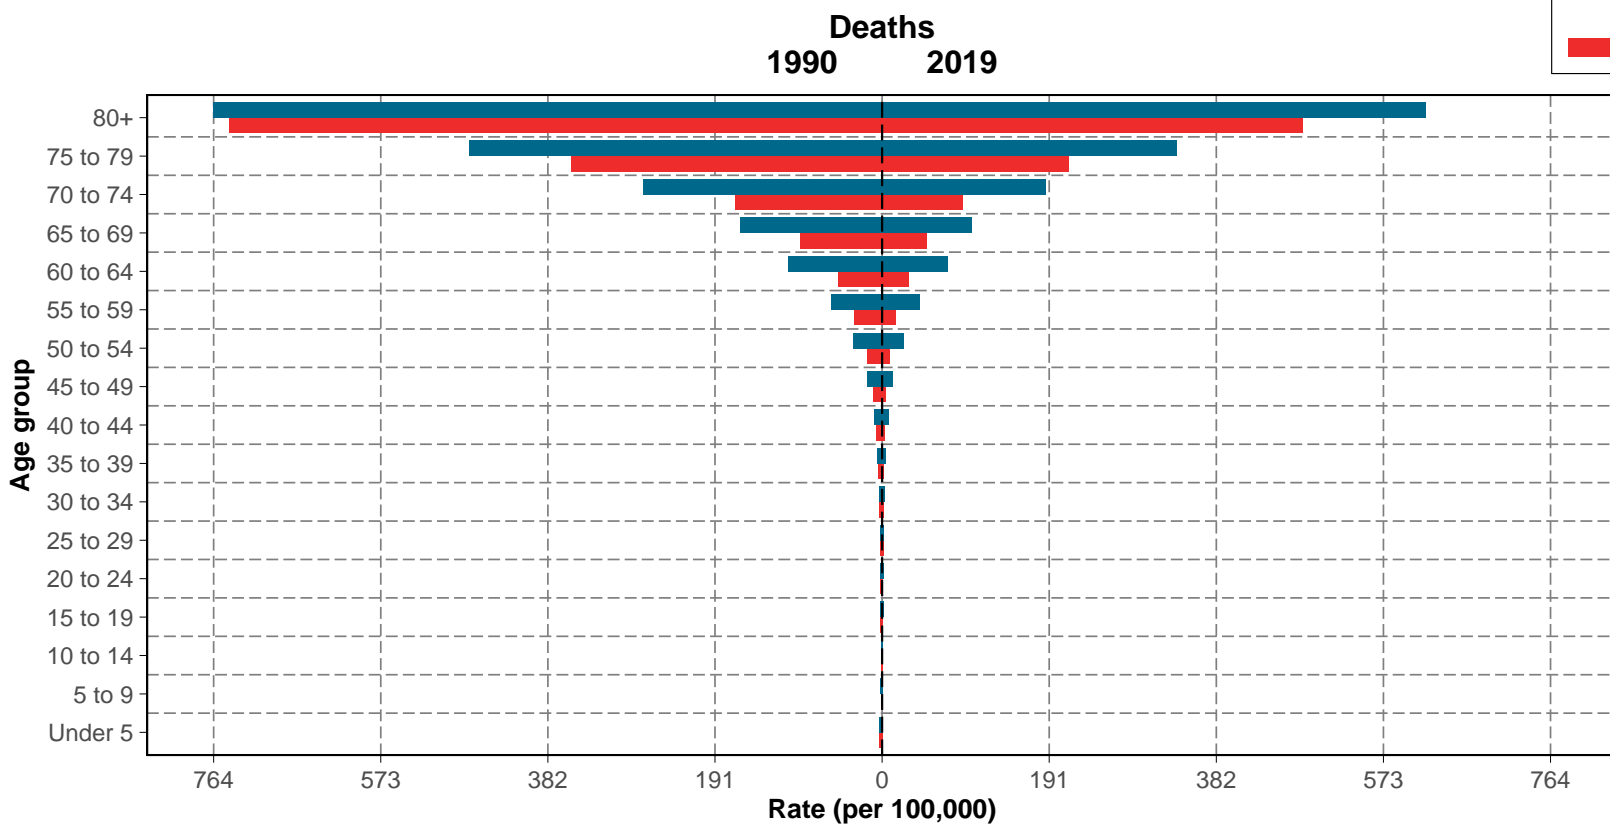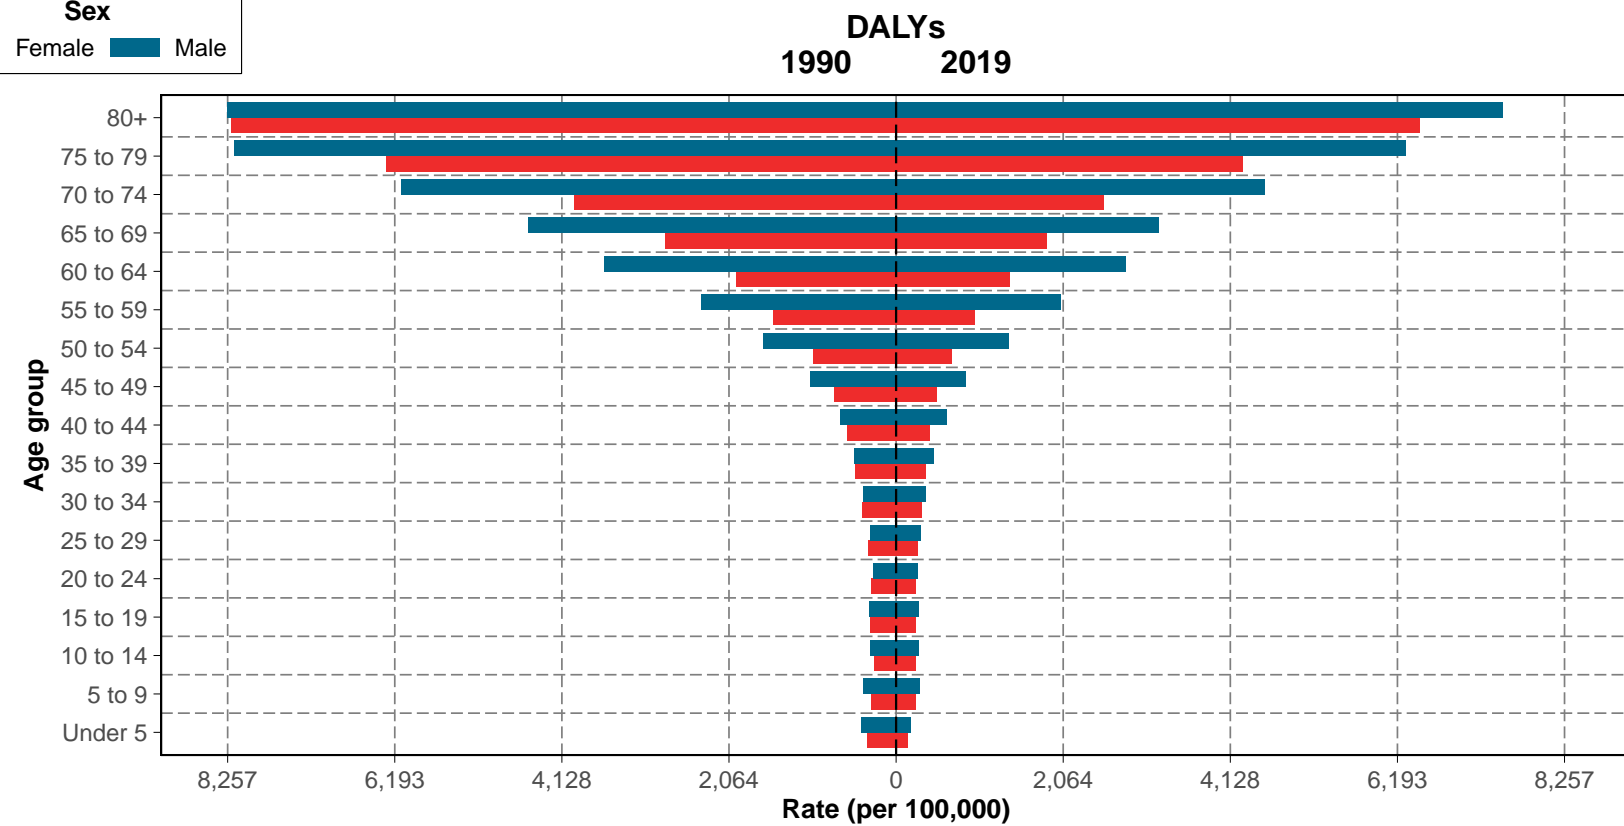

# Hormozgan

**Incidence**  
1990 2019

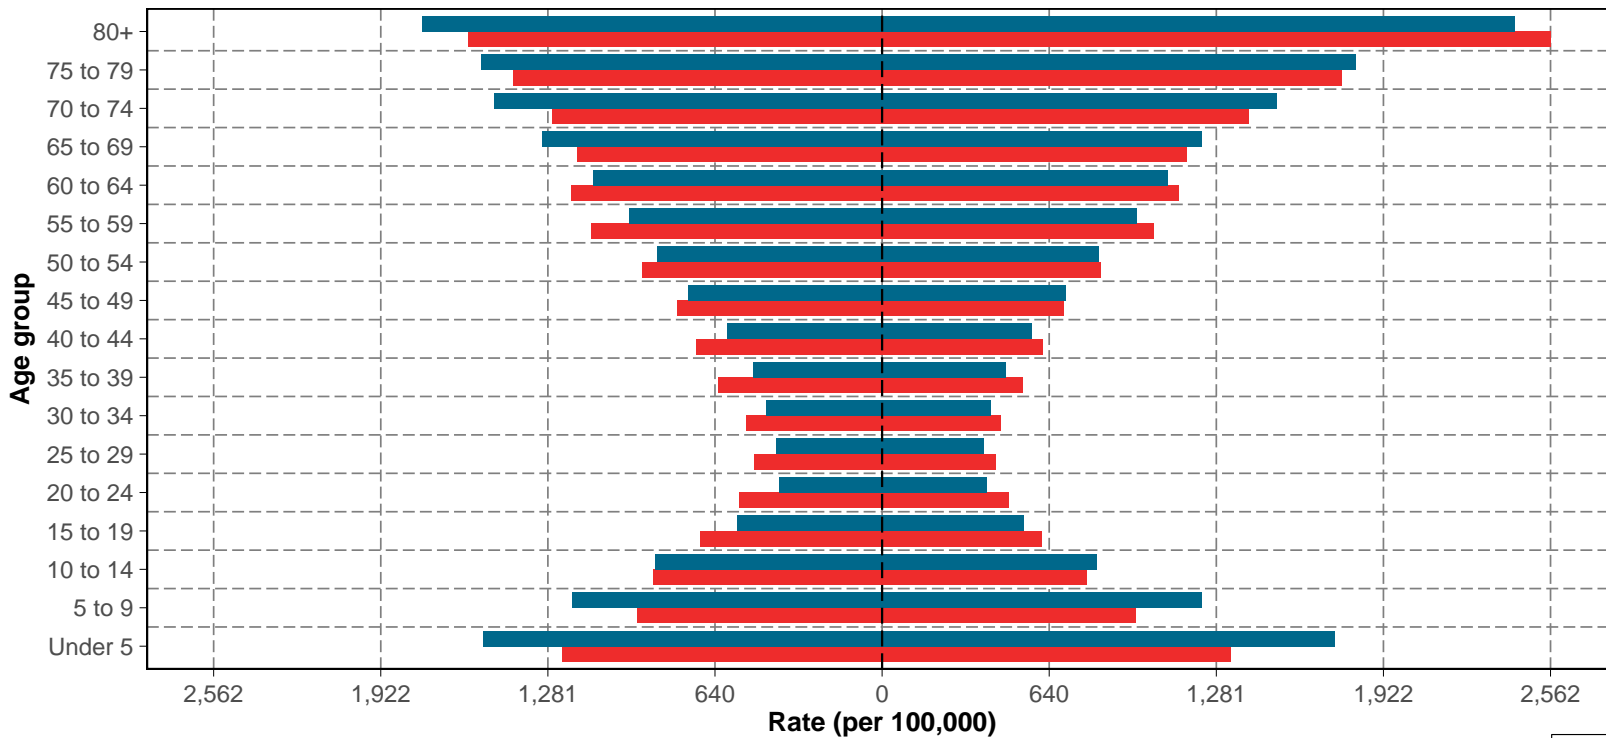

**Prevalence**  
1990 2019

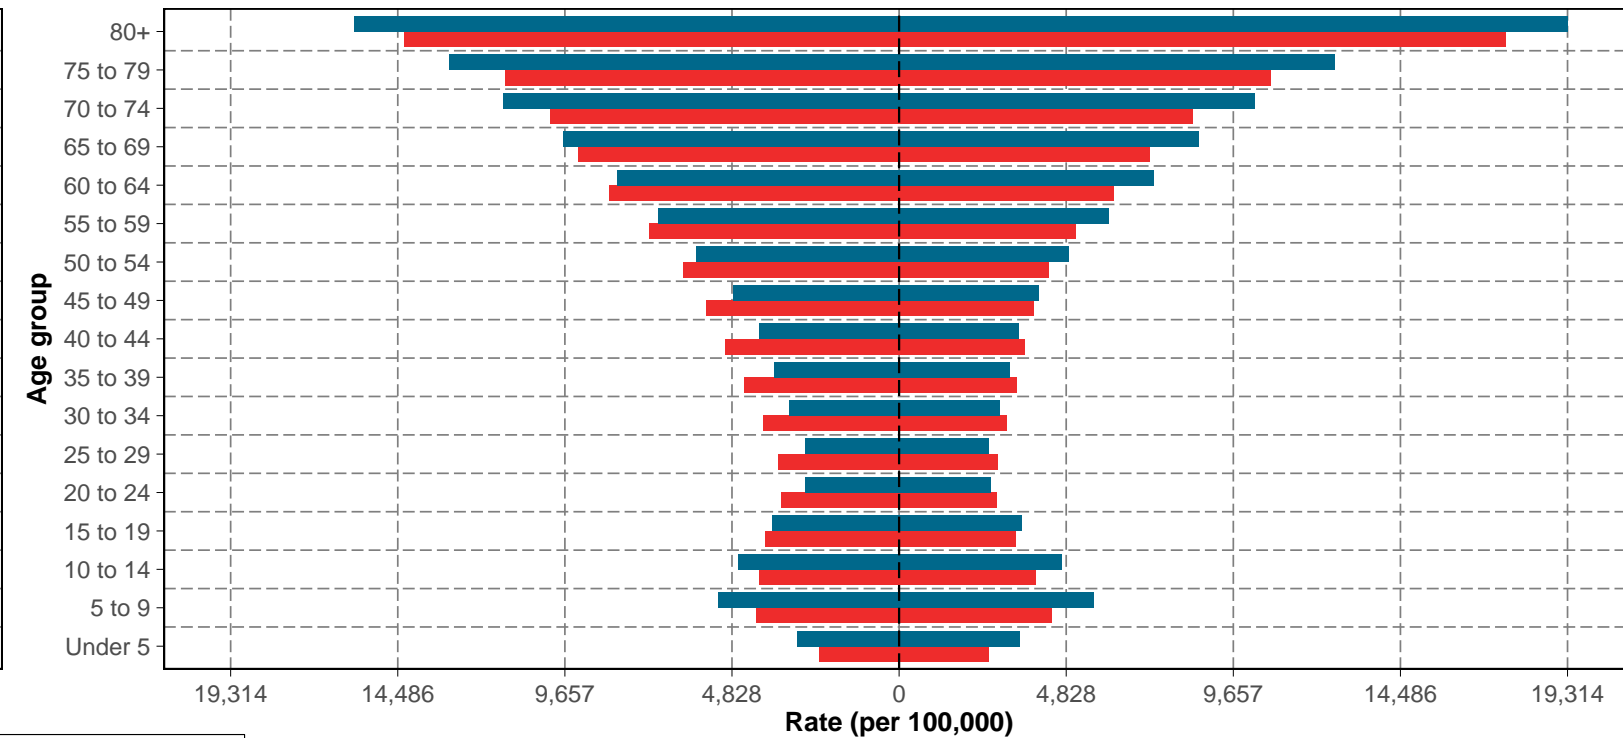

**Deaths**  
1990 2019

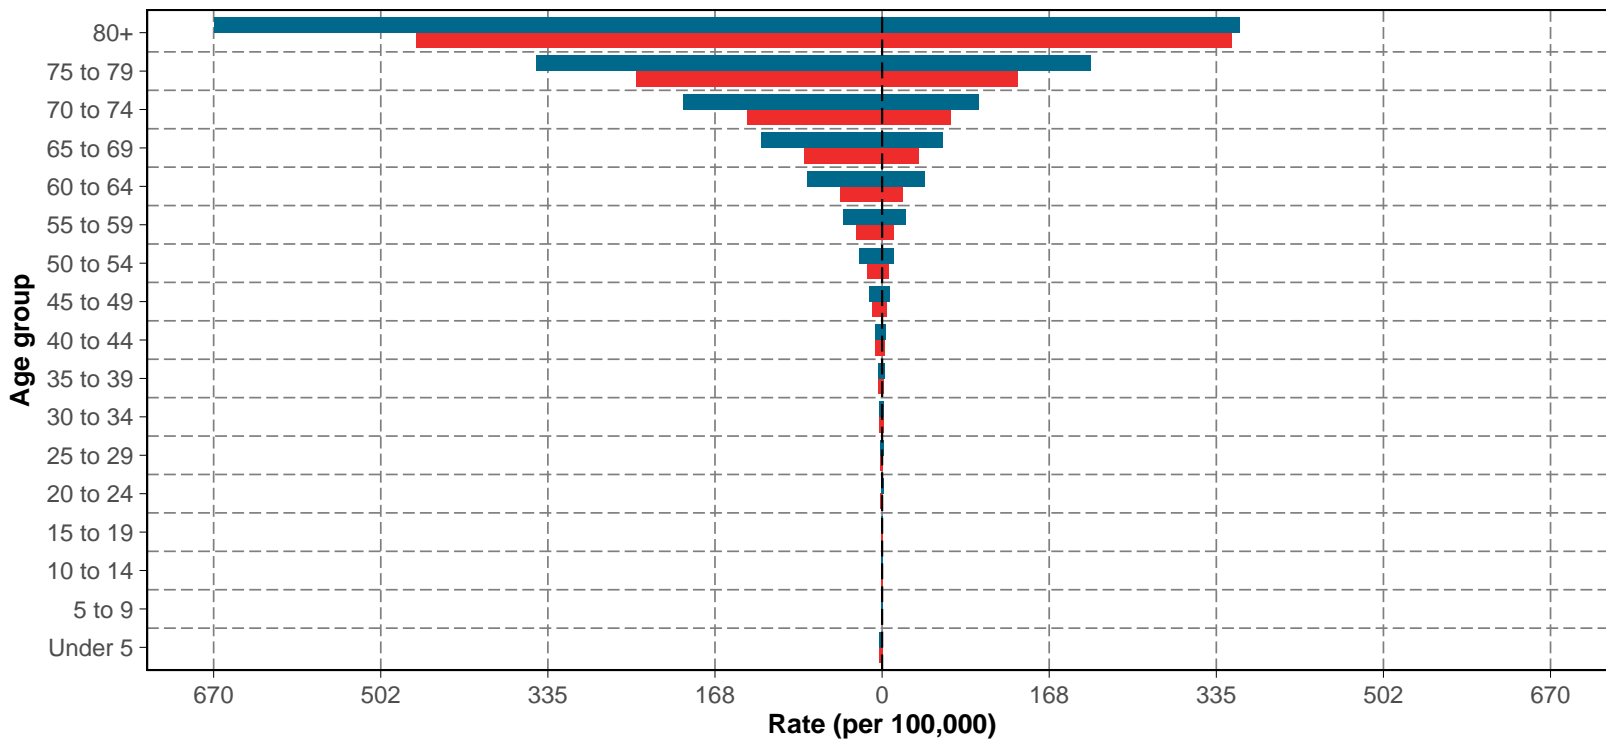

**DALYs**  
1990 2019

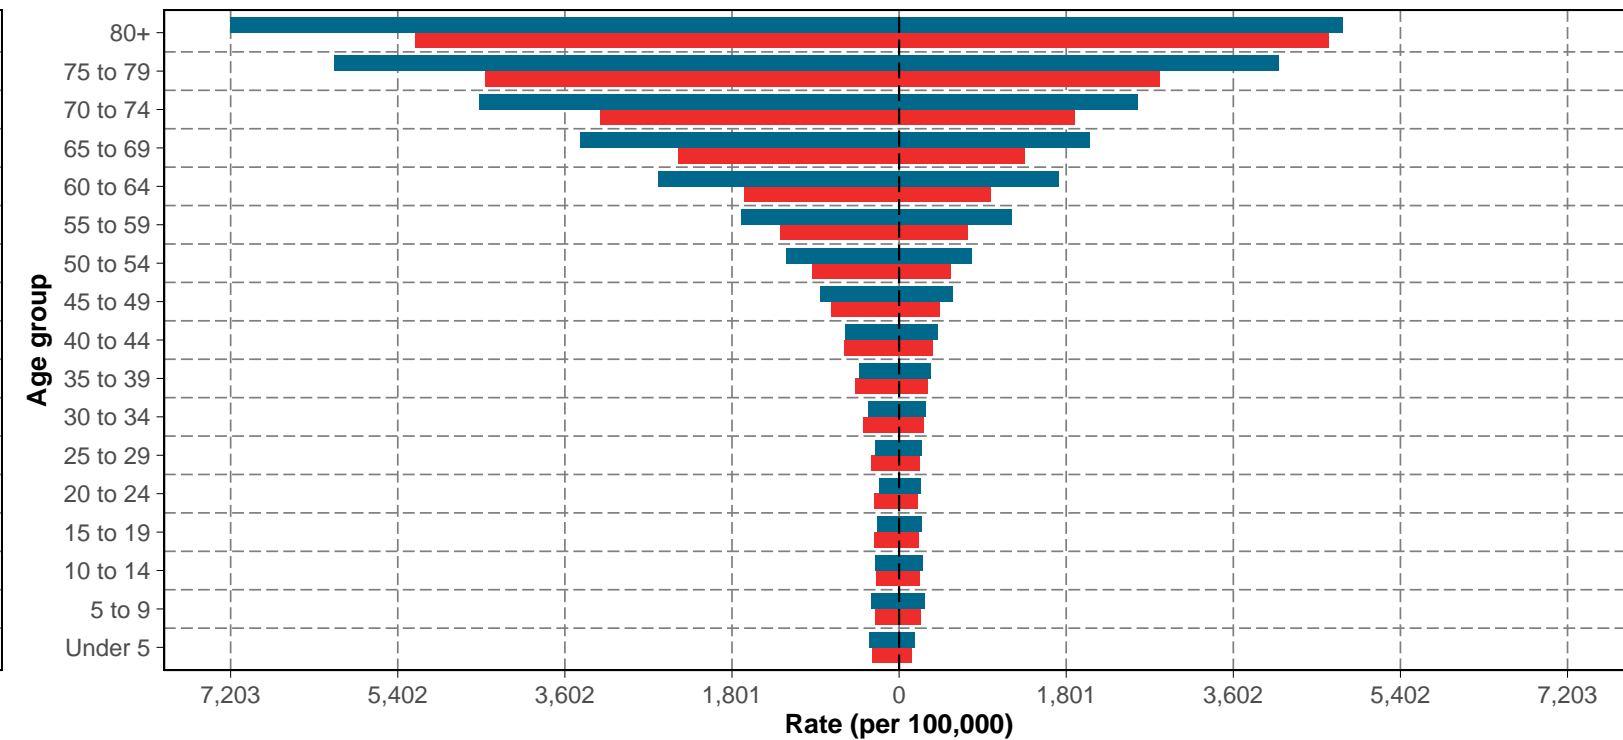

**Sex**  
Female Male

# Ilam

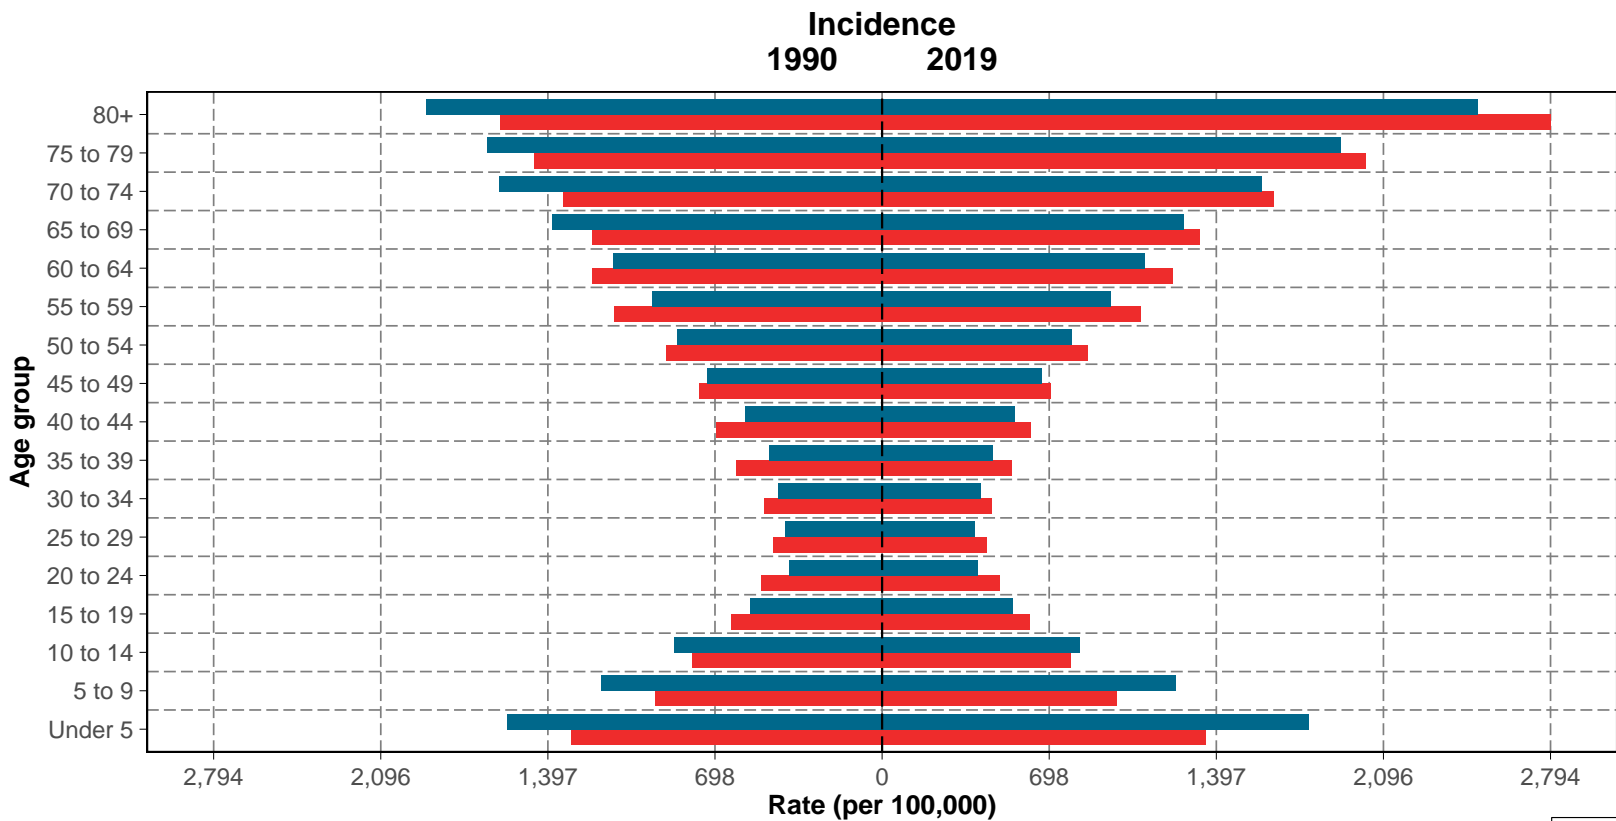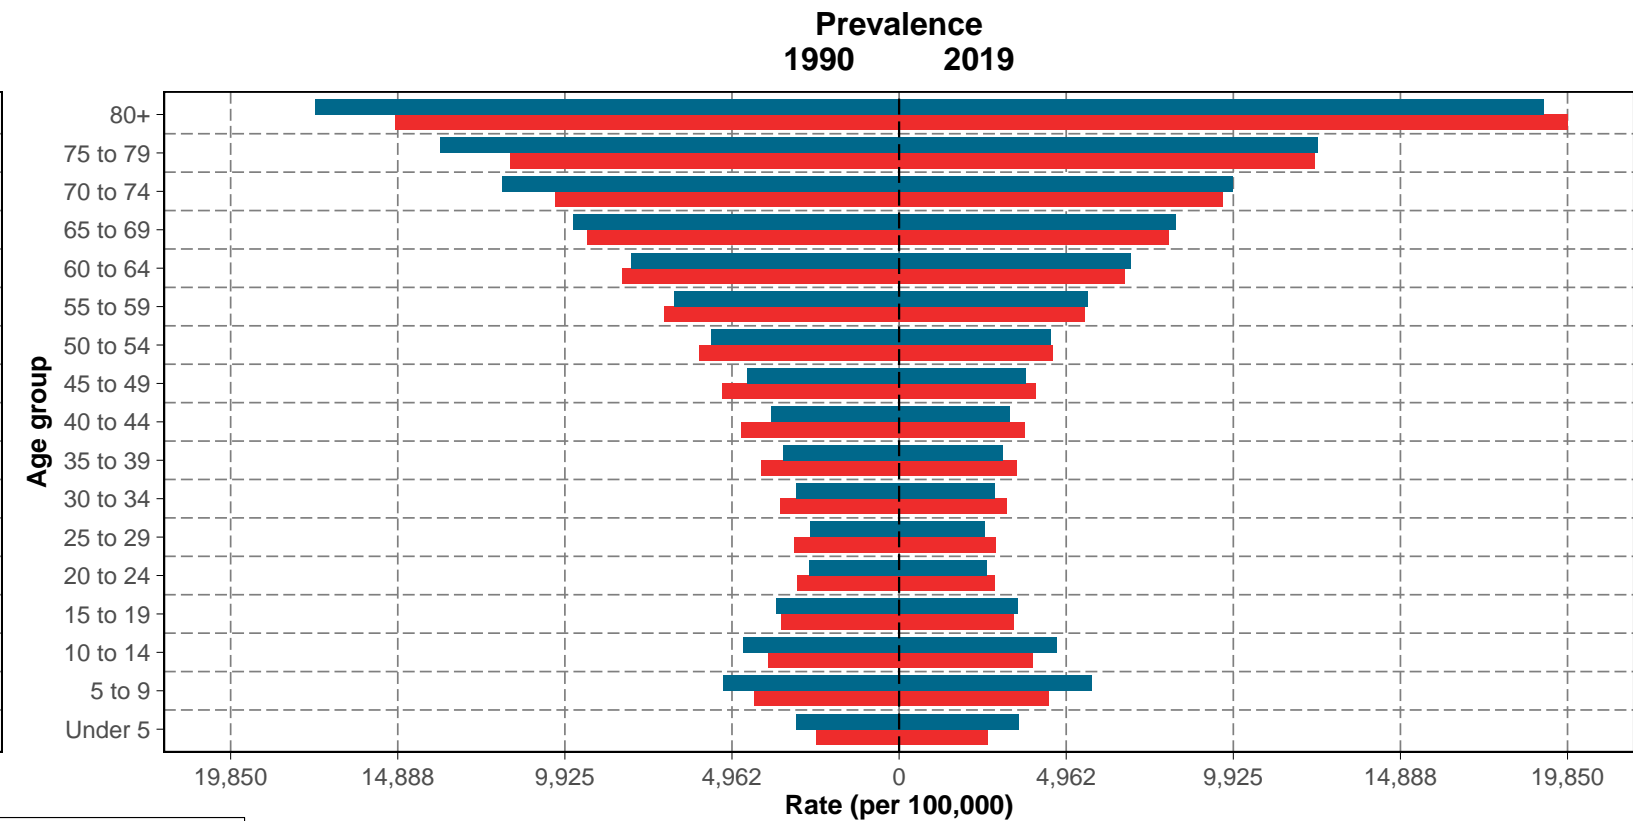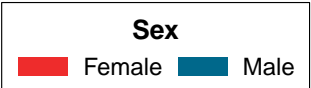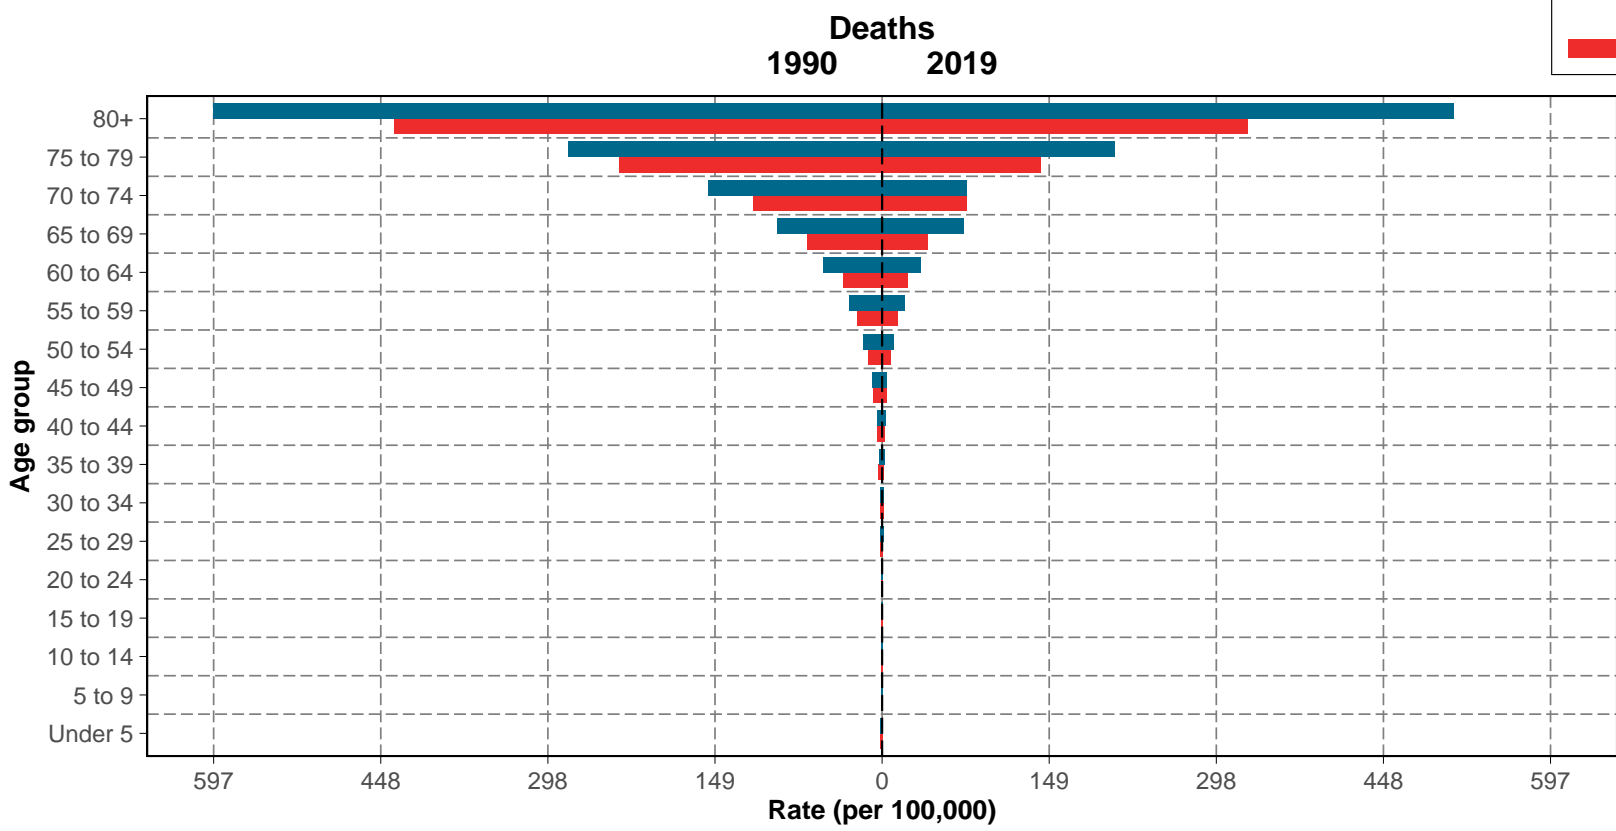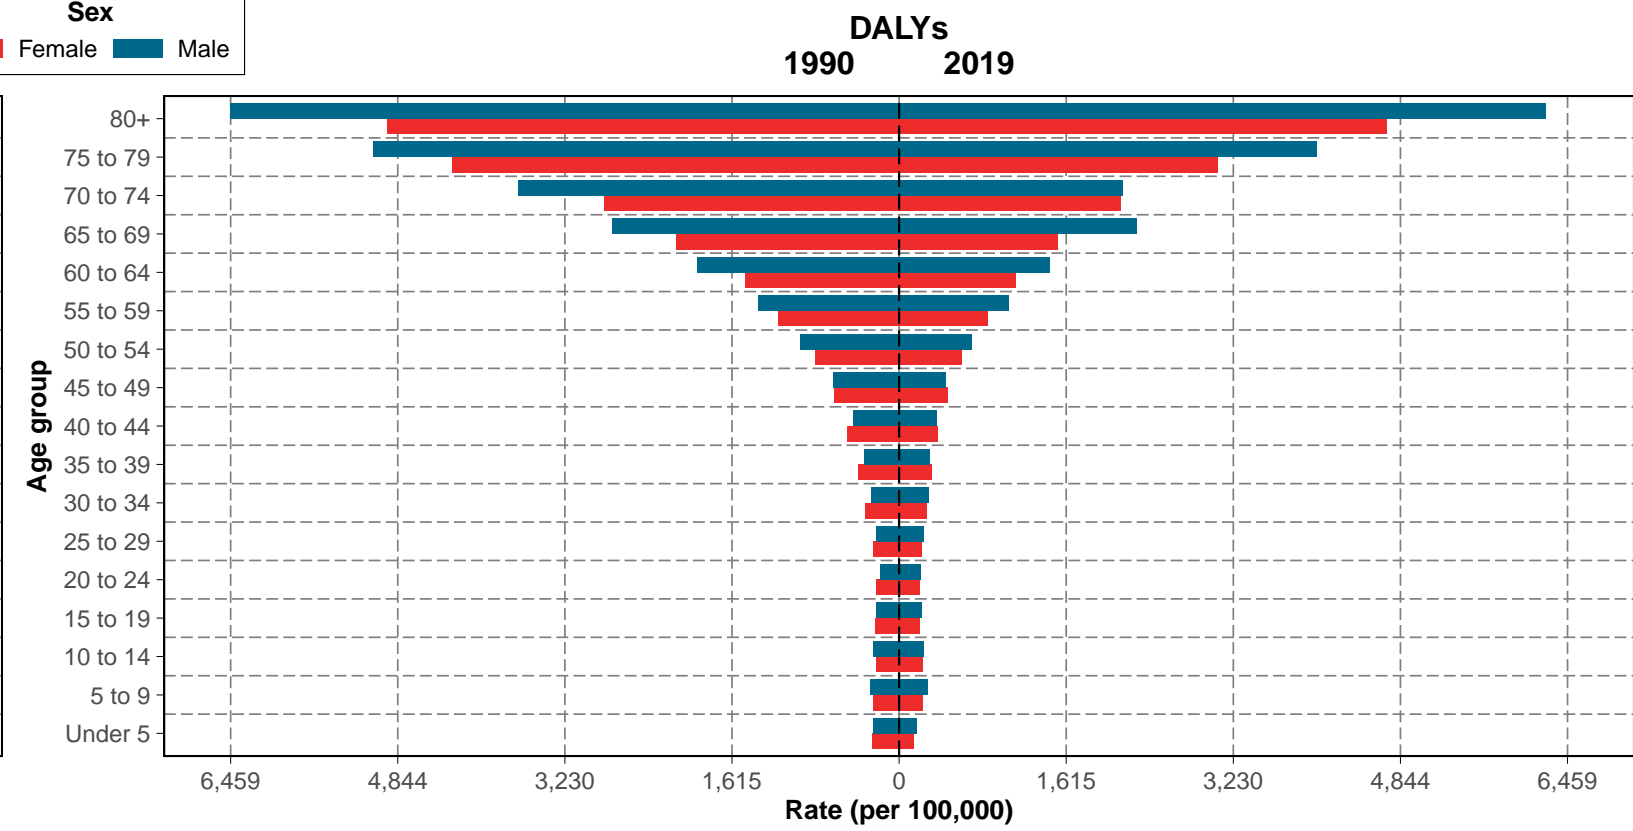

# Isfahan

**Incidence**  
1990 2019

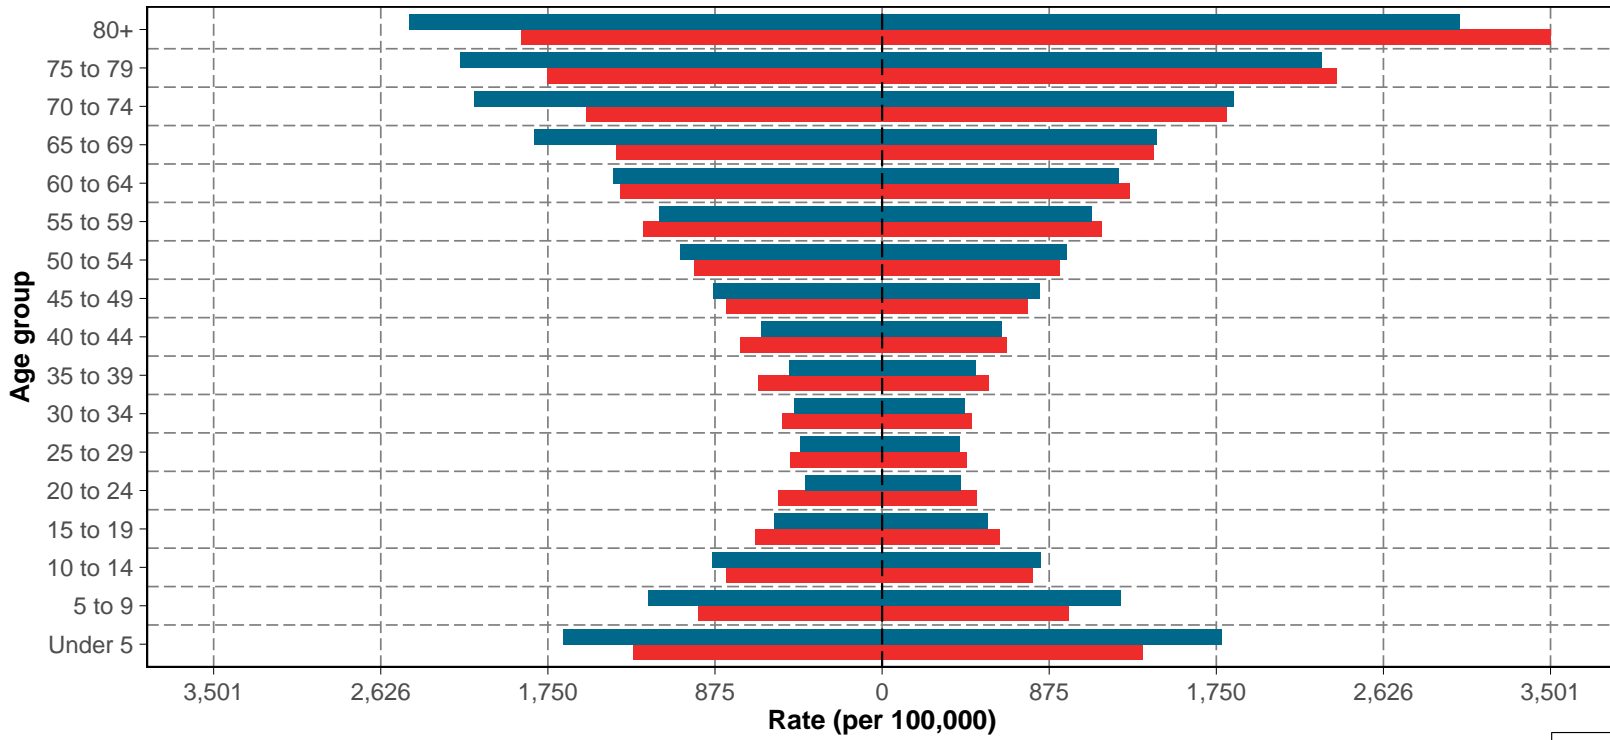

**Prevalence**  
1990 2019

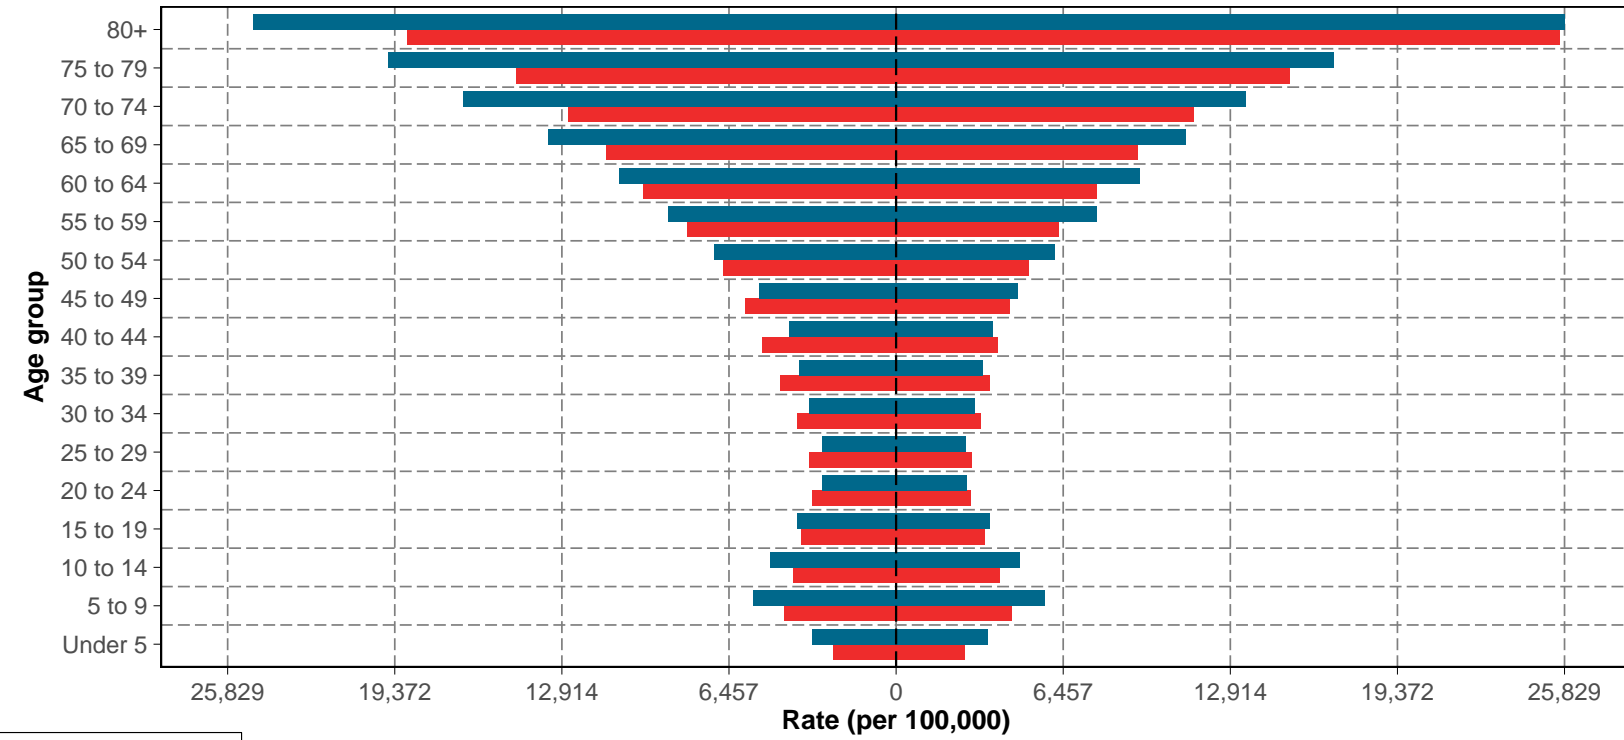

**Sex**  
Female Male

**Deaths**  
1990 2019

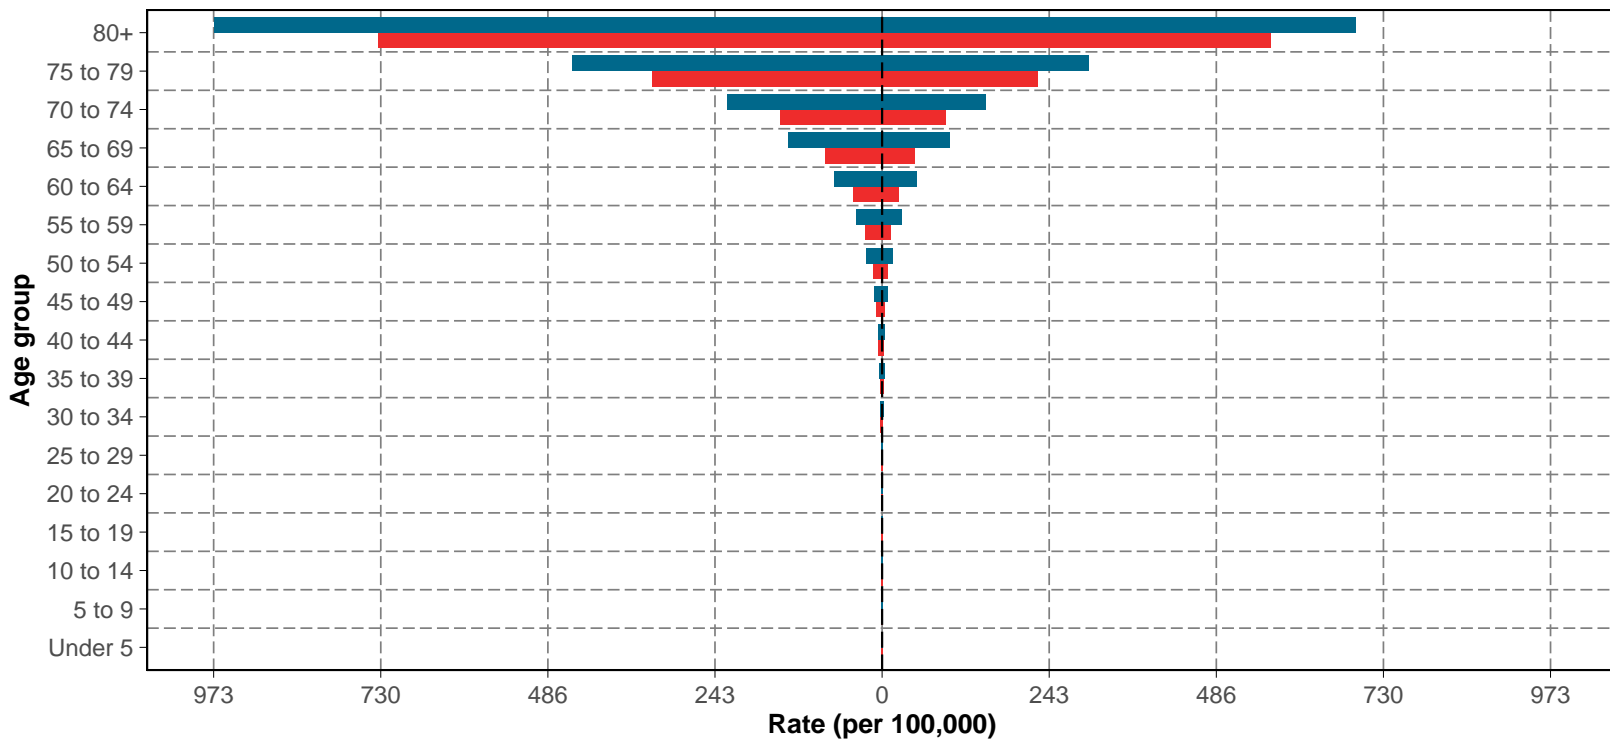

**DALYs**  
1990 2019

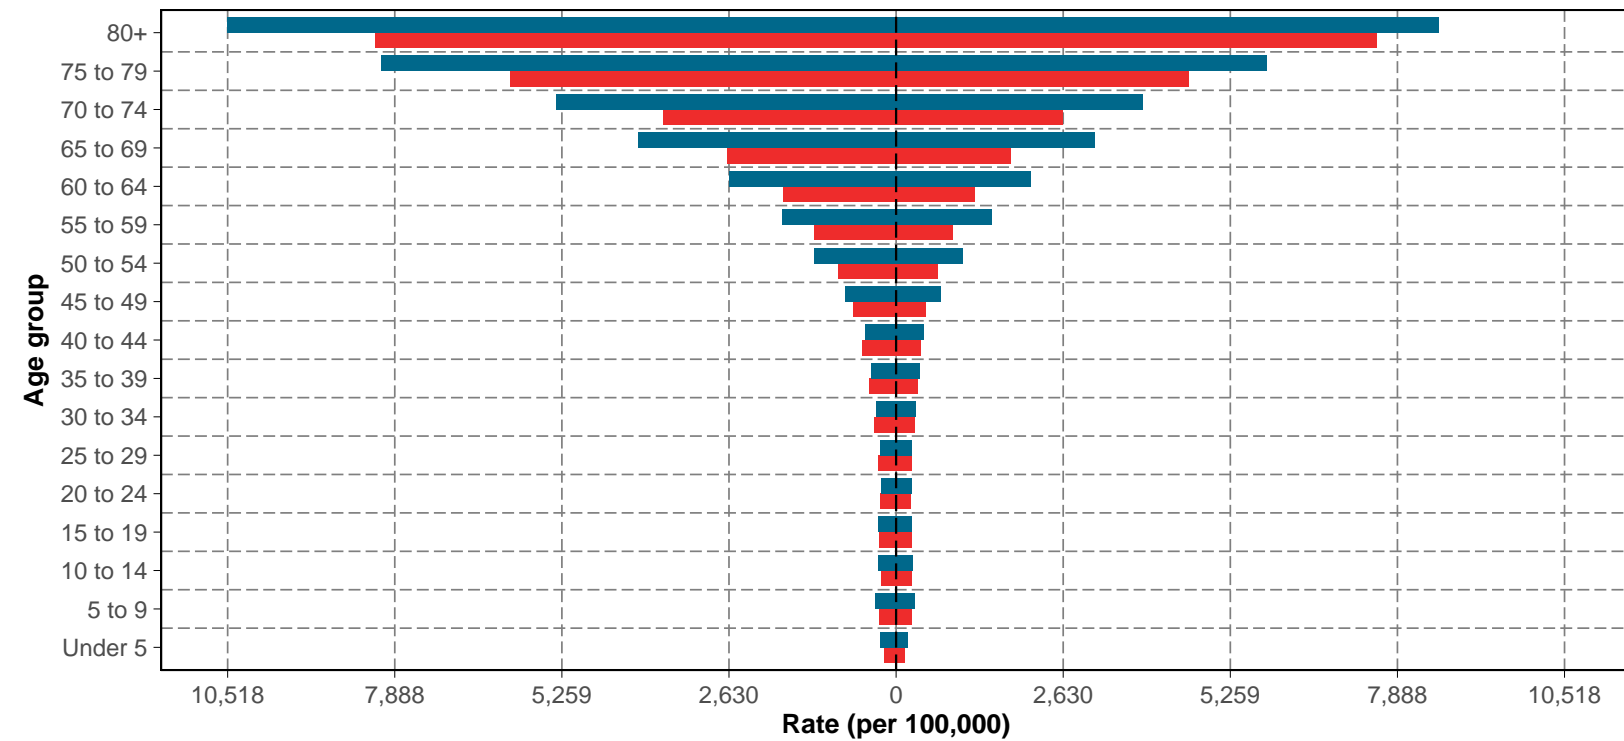

# Kerman

**Incidence**  
1990 2019

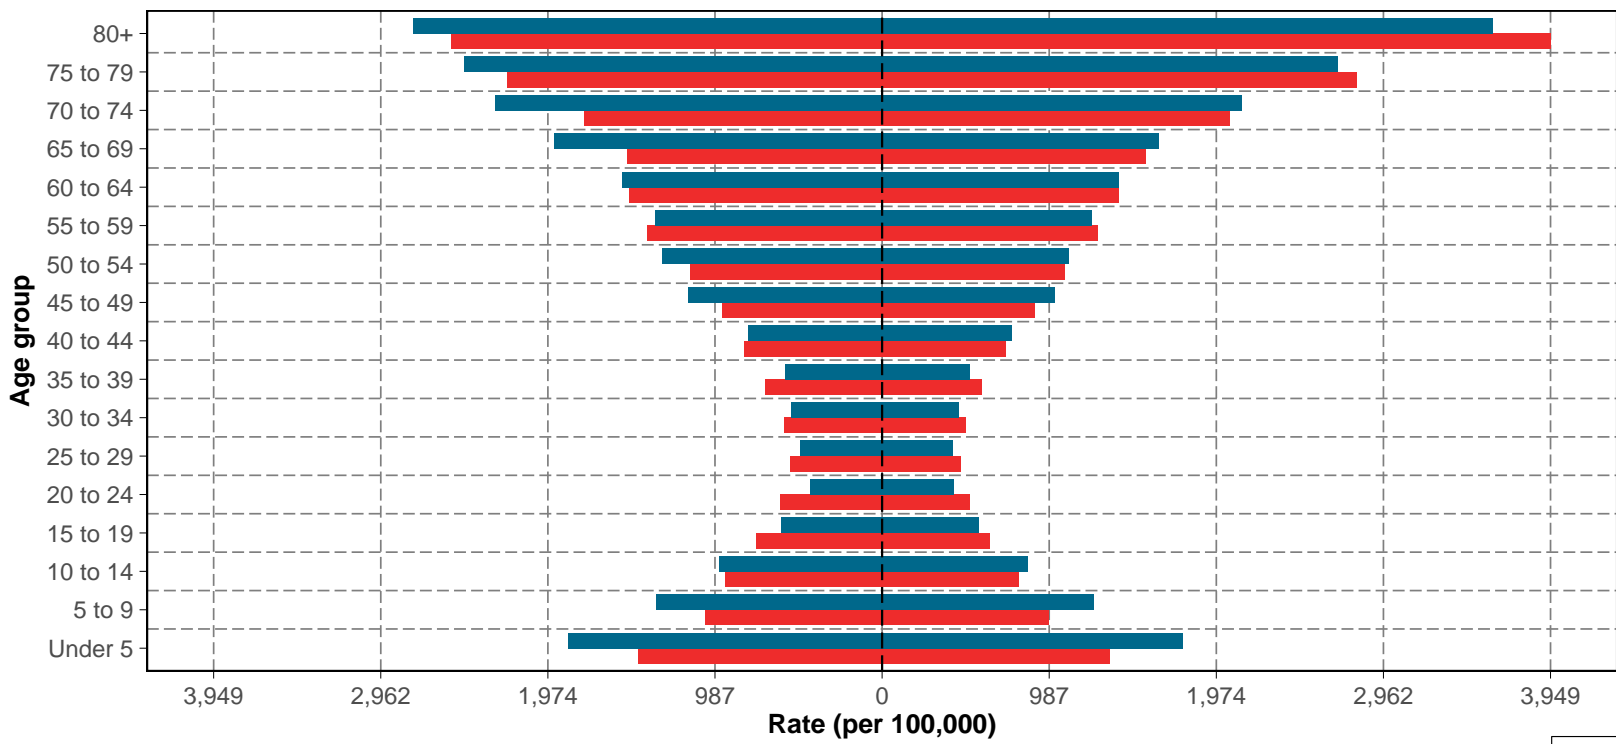

**Prevalence**  
1990 2019

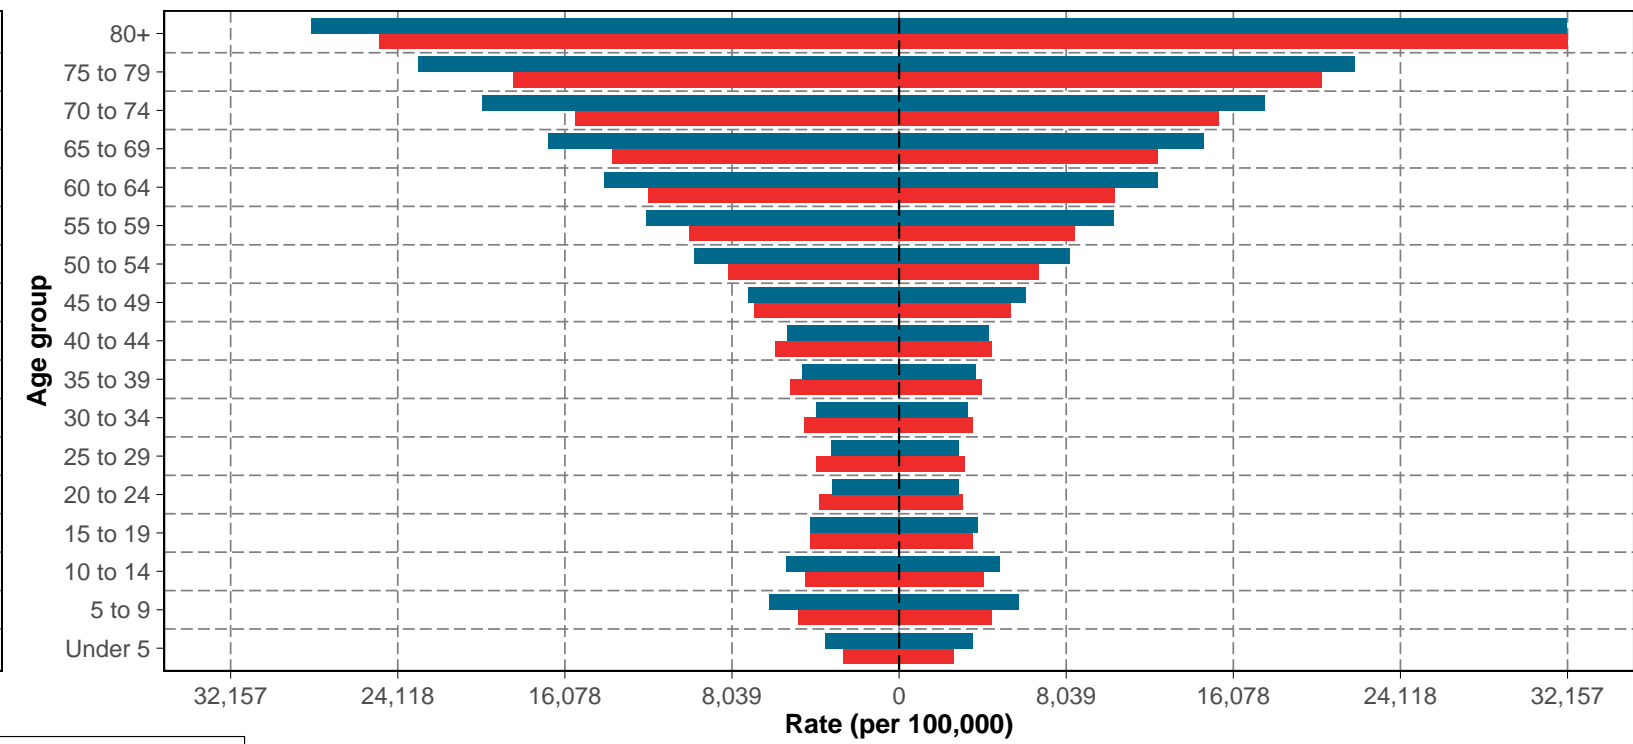

**Deaths**  
1990 2019

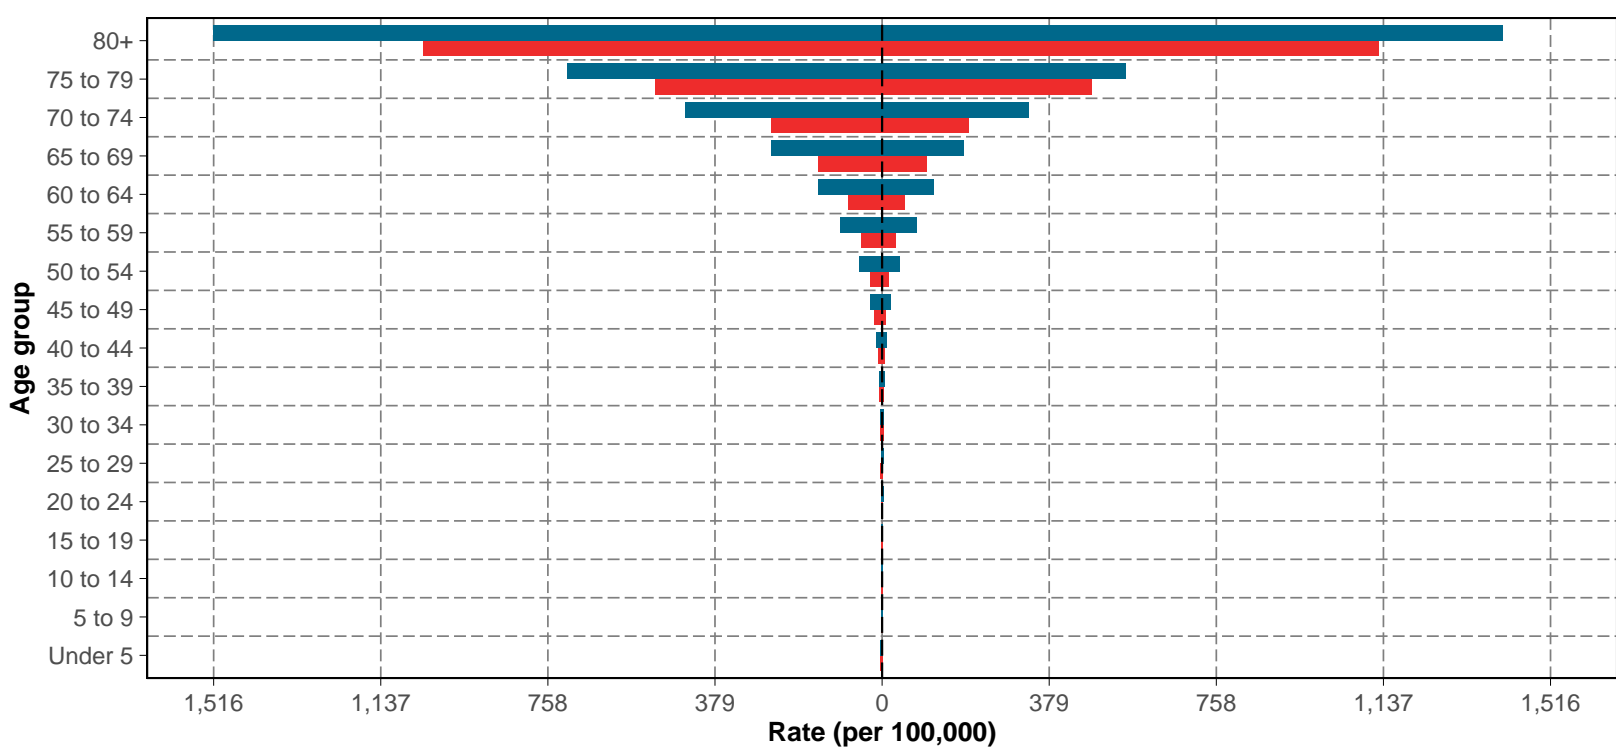

**DALYs**  
1990 2019

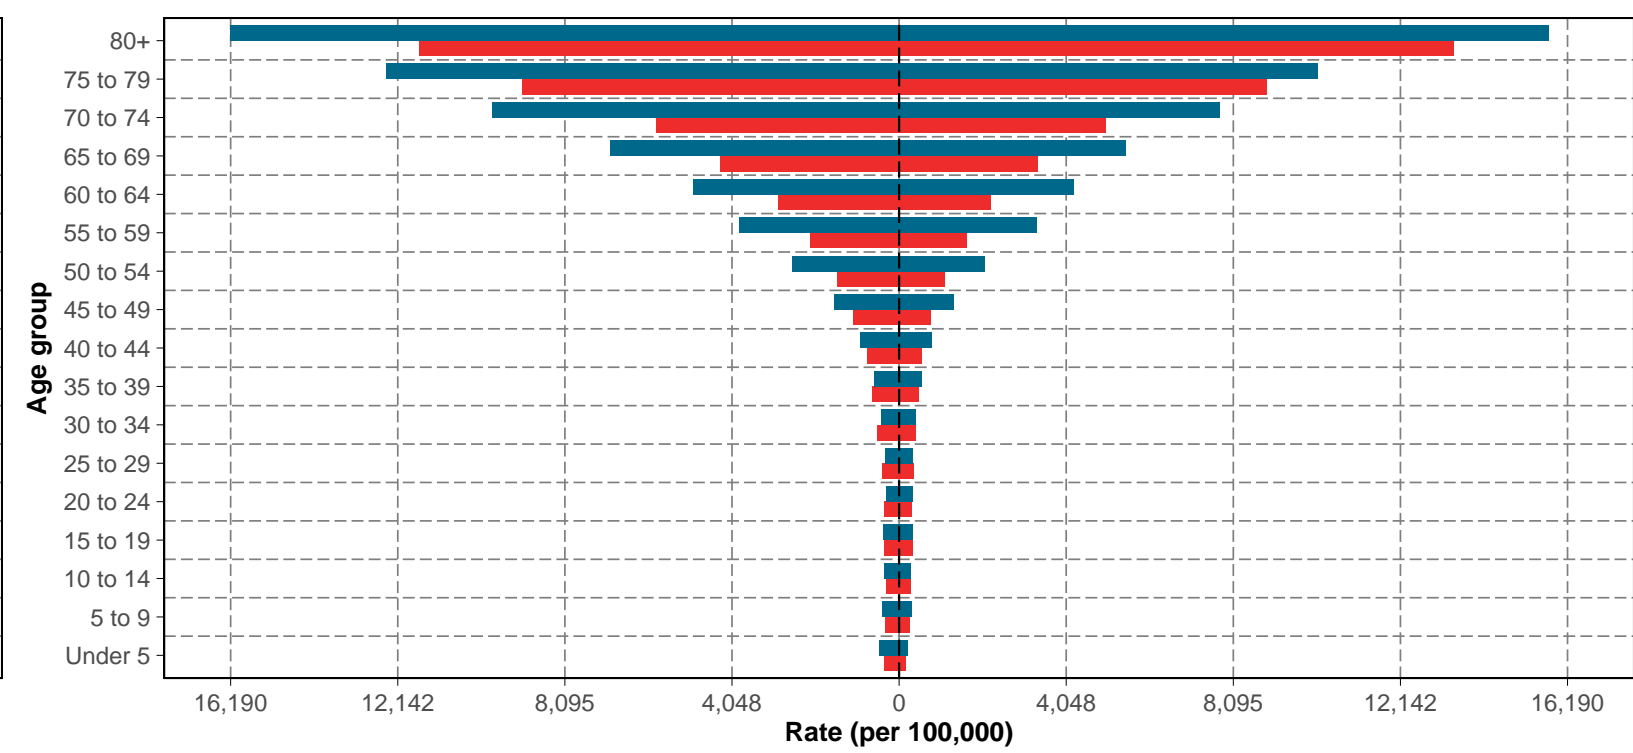

**Sex**  
Female Male

# Kermanshah

**Incidence**  
1990 2019

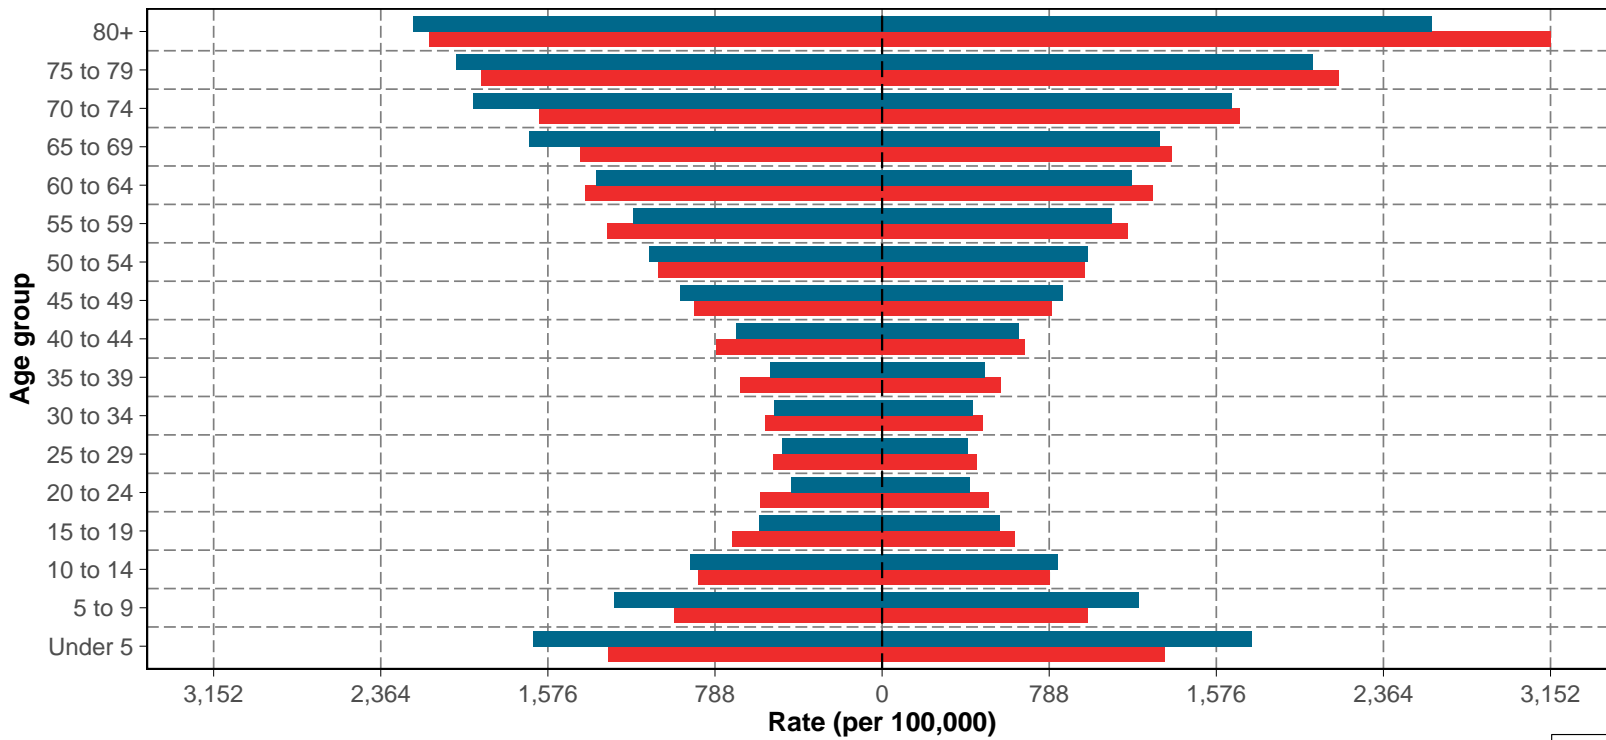

**Prevalence**  
1990 2019

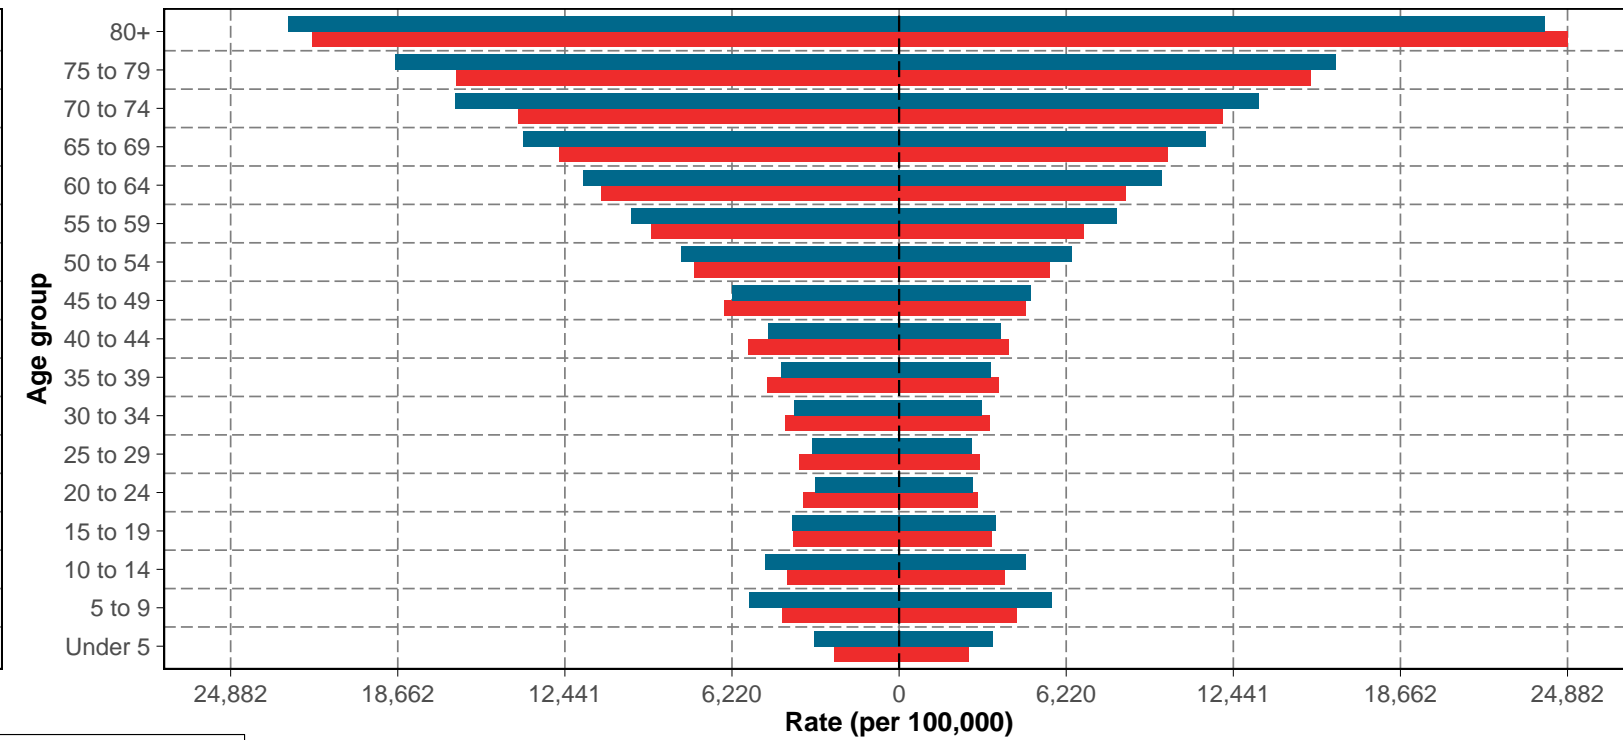

**Deaths**  
1990 2019

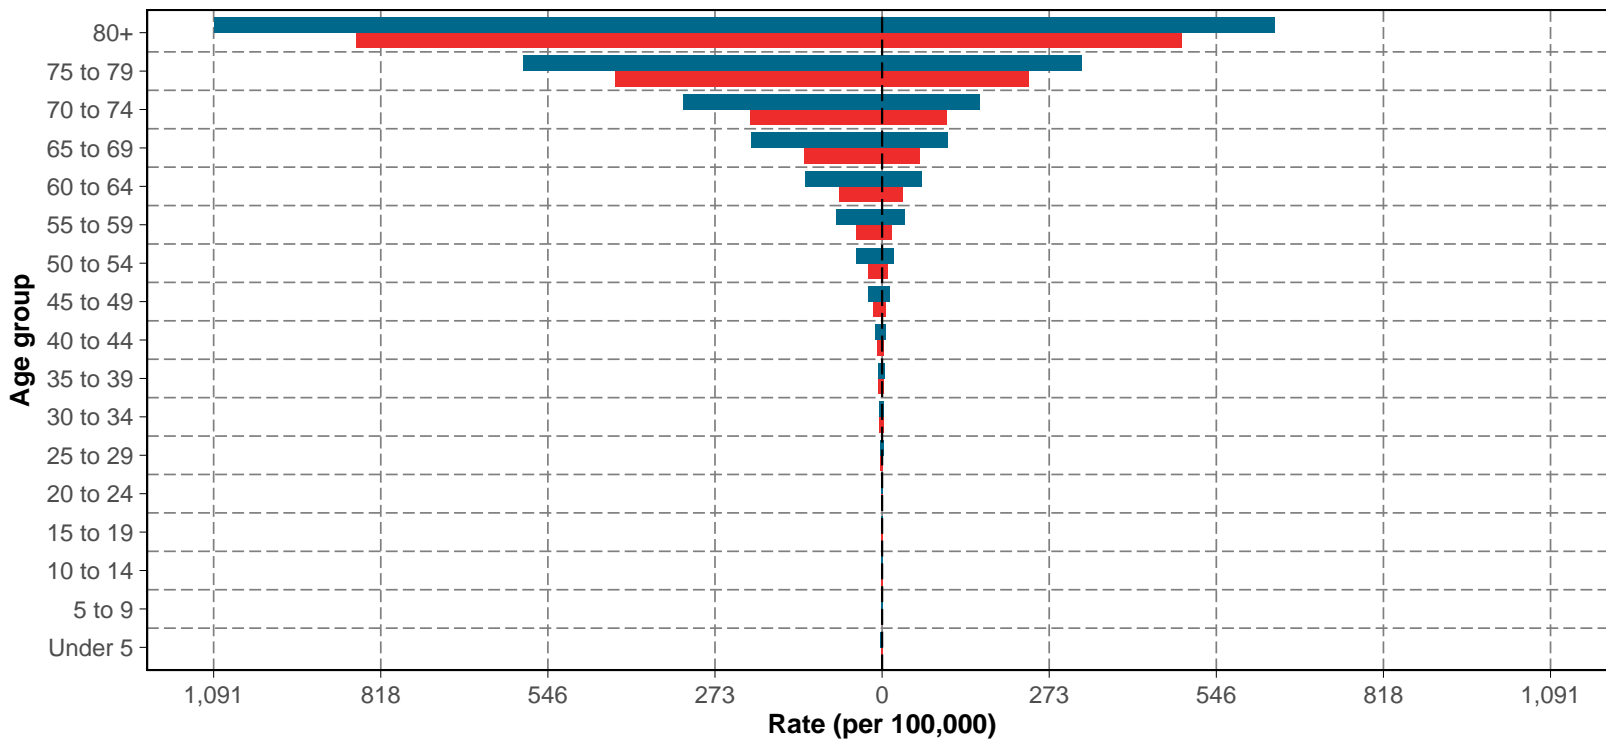

**DALYs**  
1990 2019

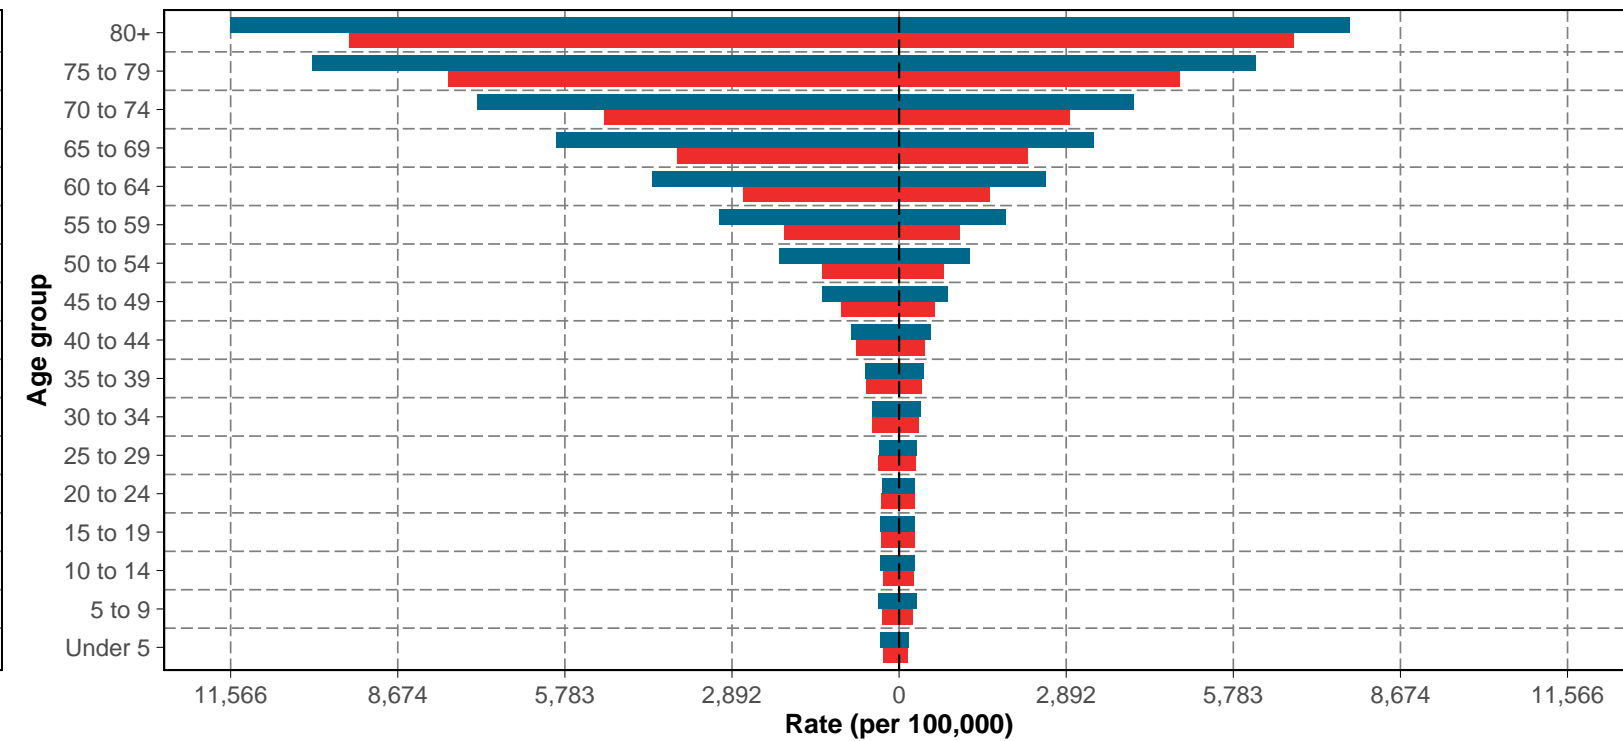

**Sex**  
Female Male

# Khorasan-e-Razavi

**Incidence**  
1990 2019

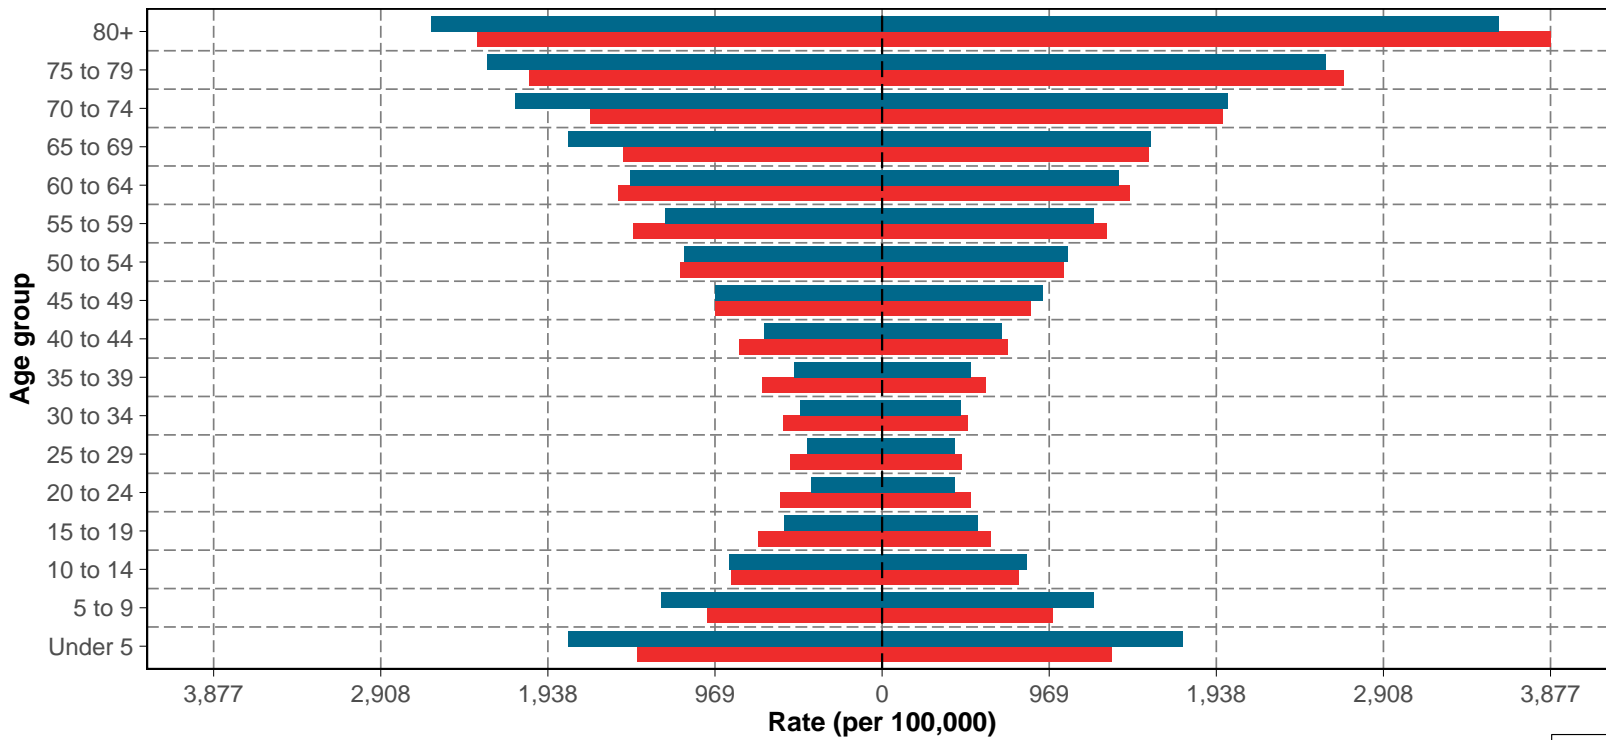

**Prevalence**  
1990 2019

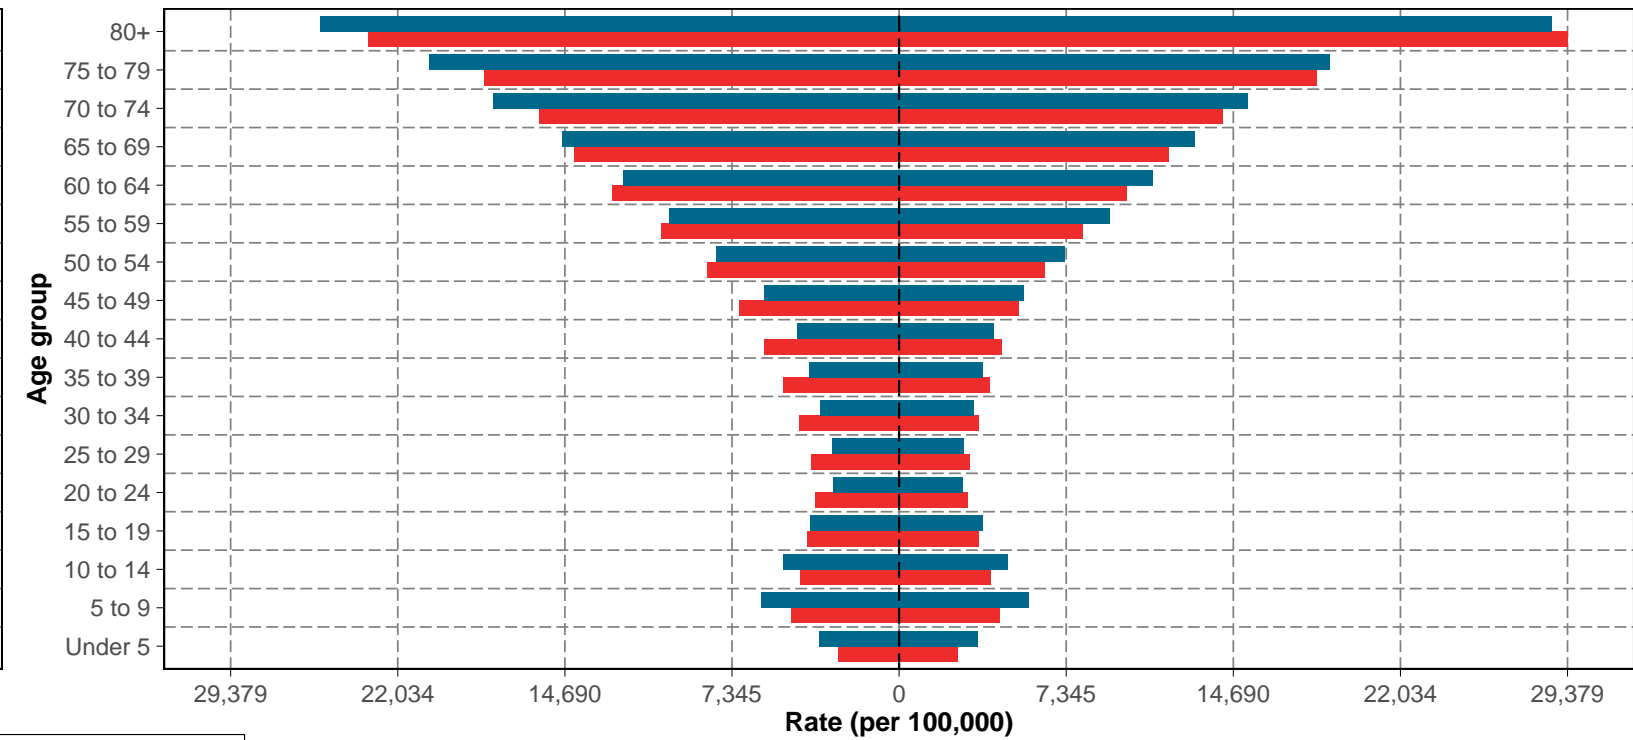

**Deaths**  
1990 2019

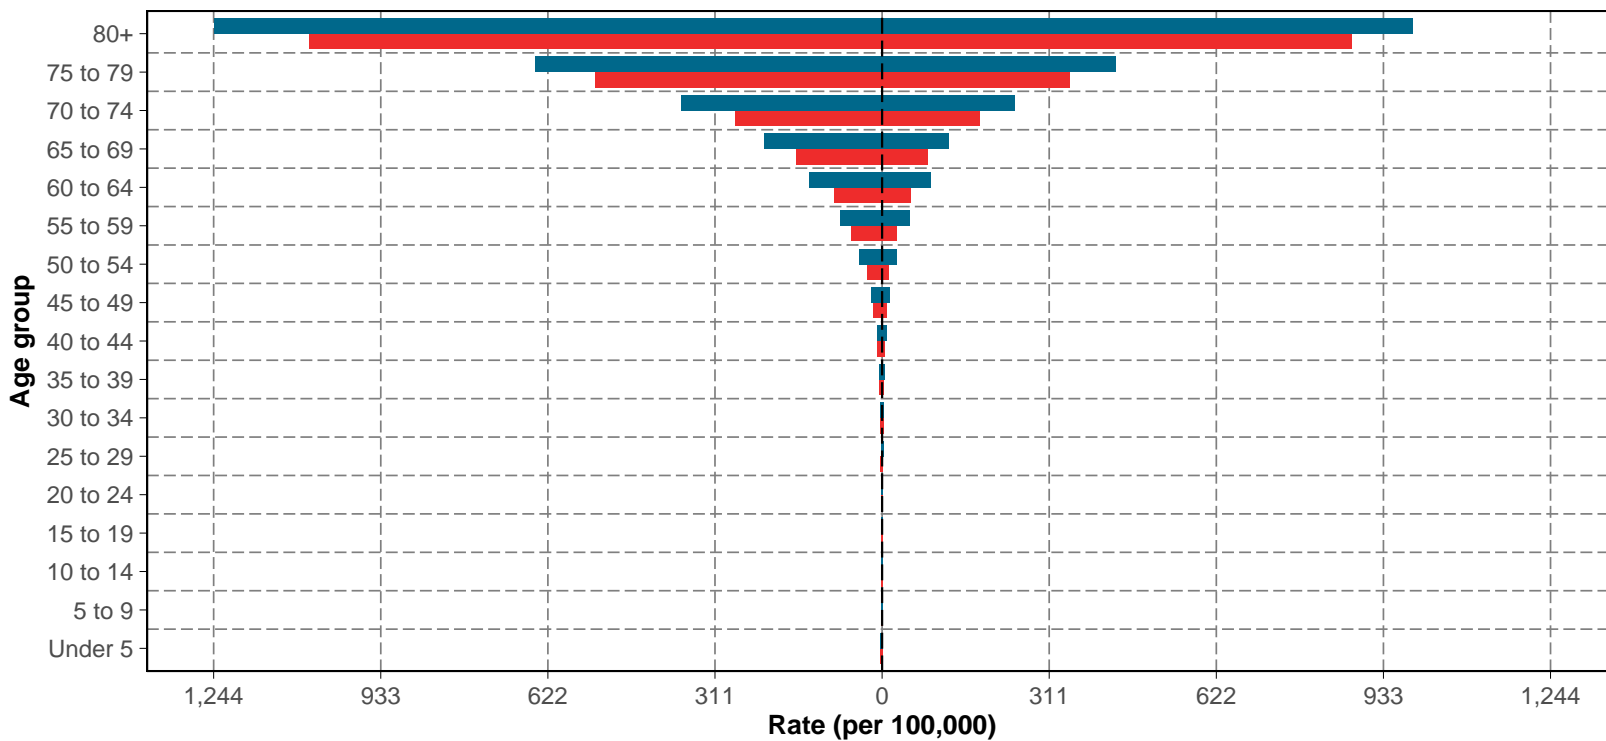

**DALYs**  
1990 2019

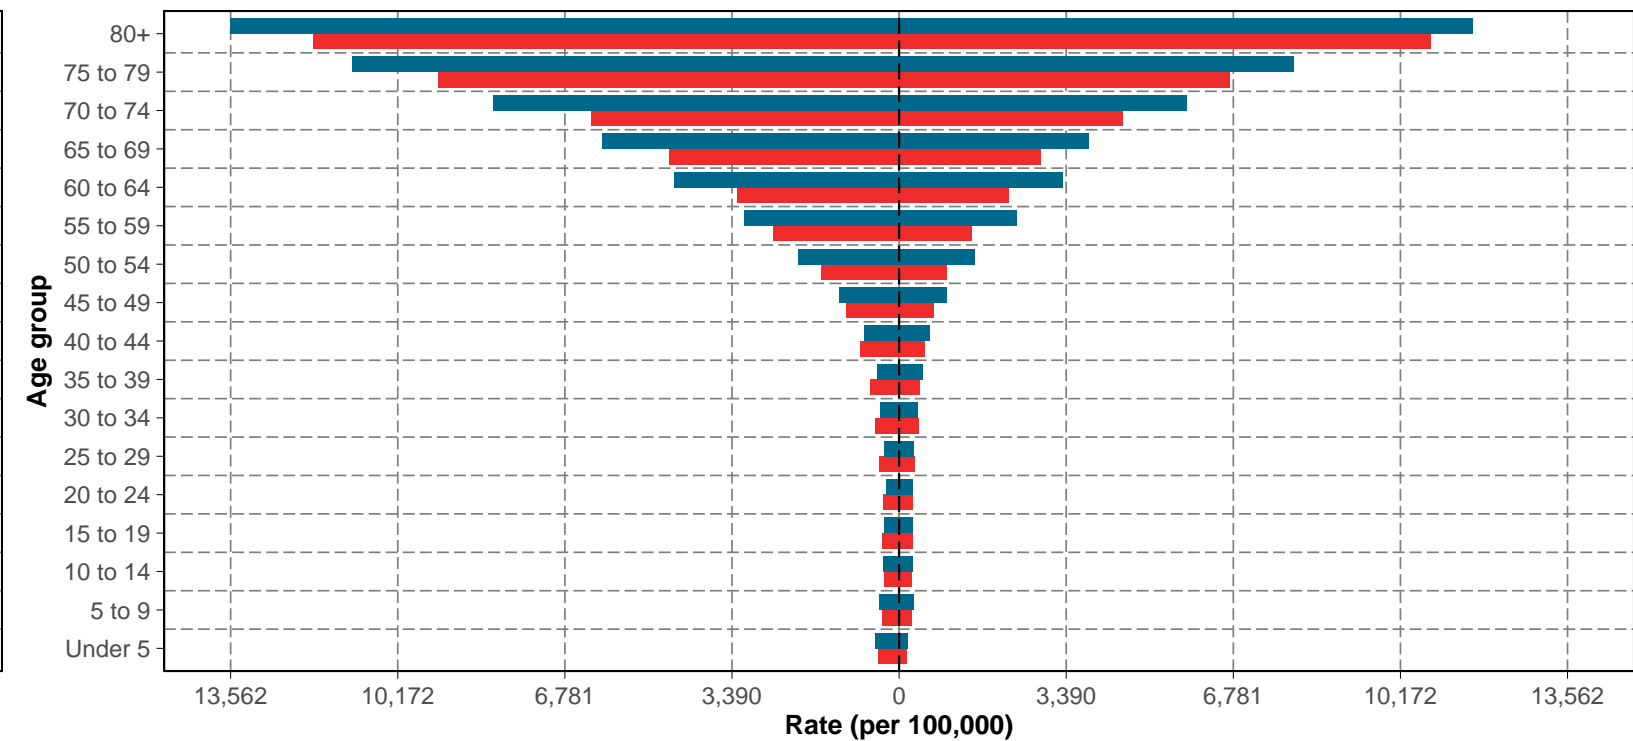

**Sex**  
Female Male

# Khuzestan

**Incidence**  
1990 2019

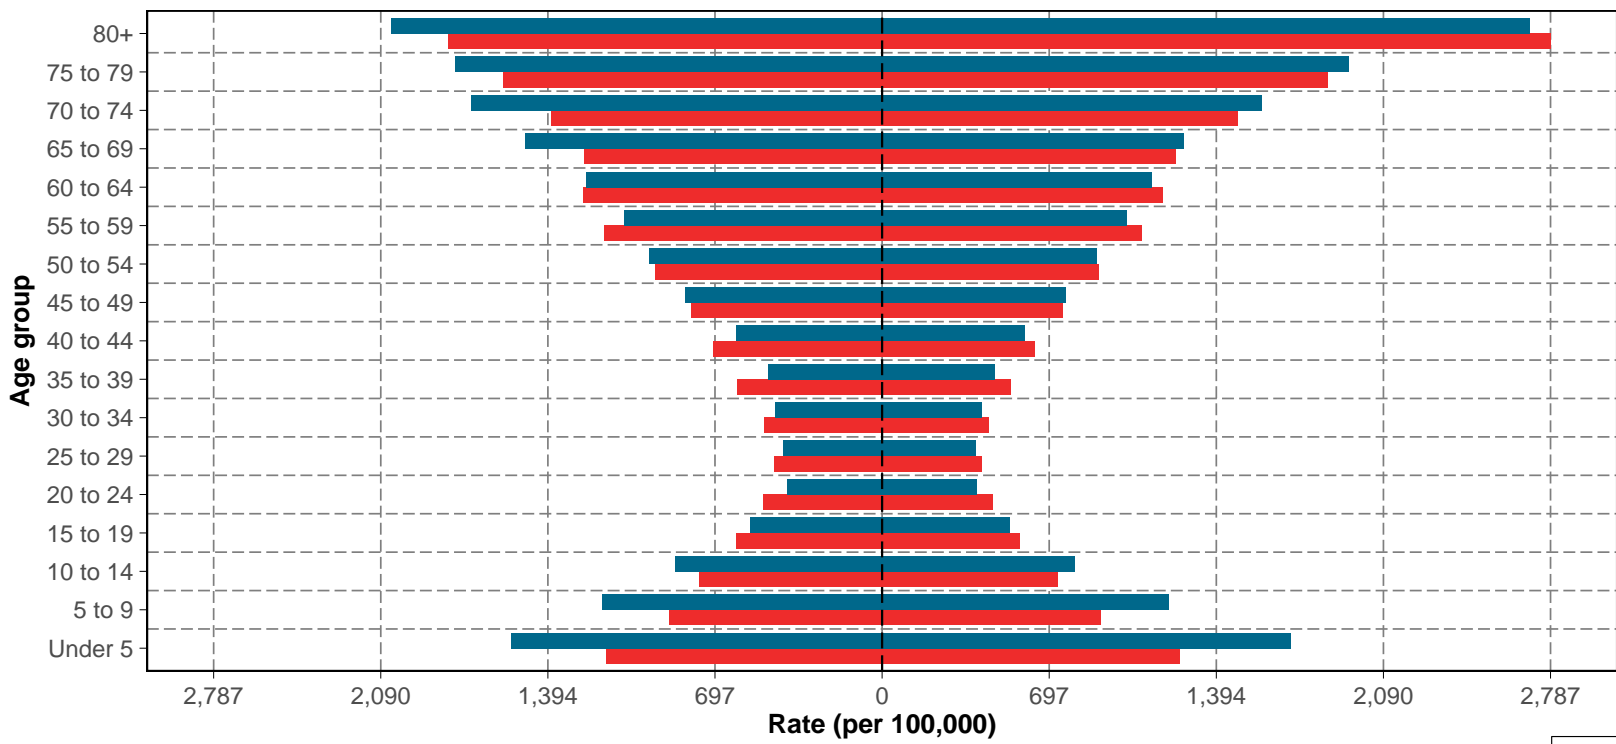

**Prevalence**  
1990 2019

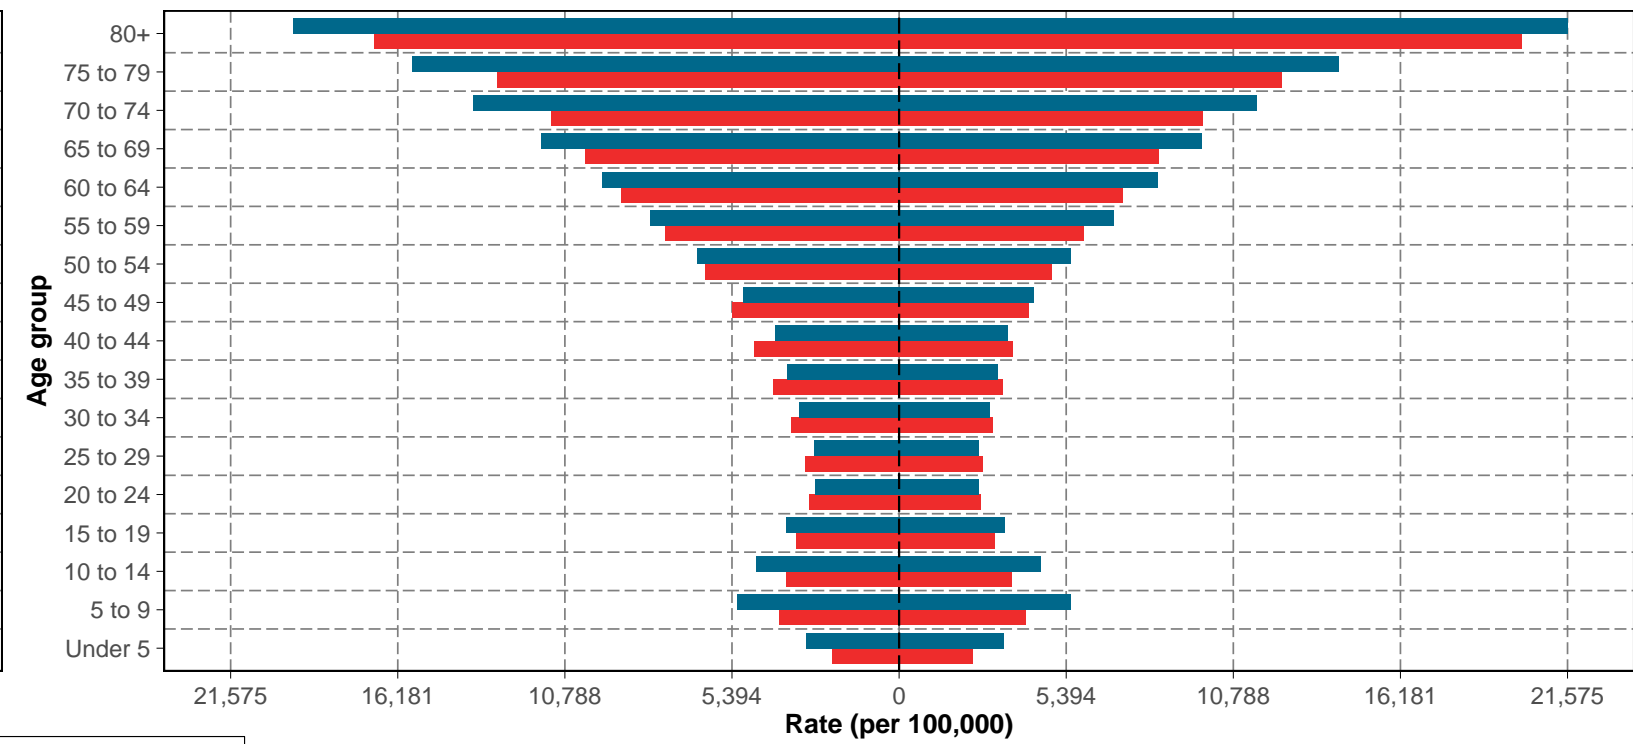

**Deaths**  
1990 2019

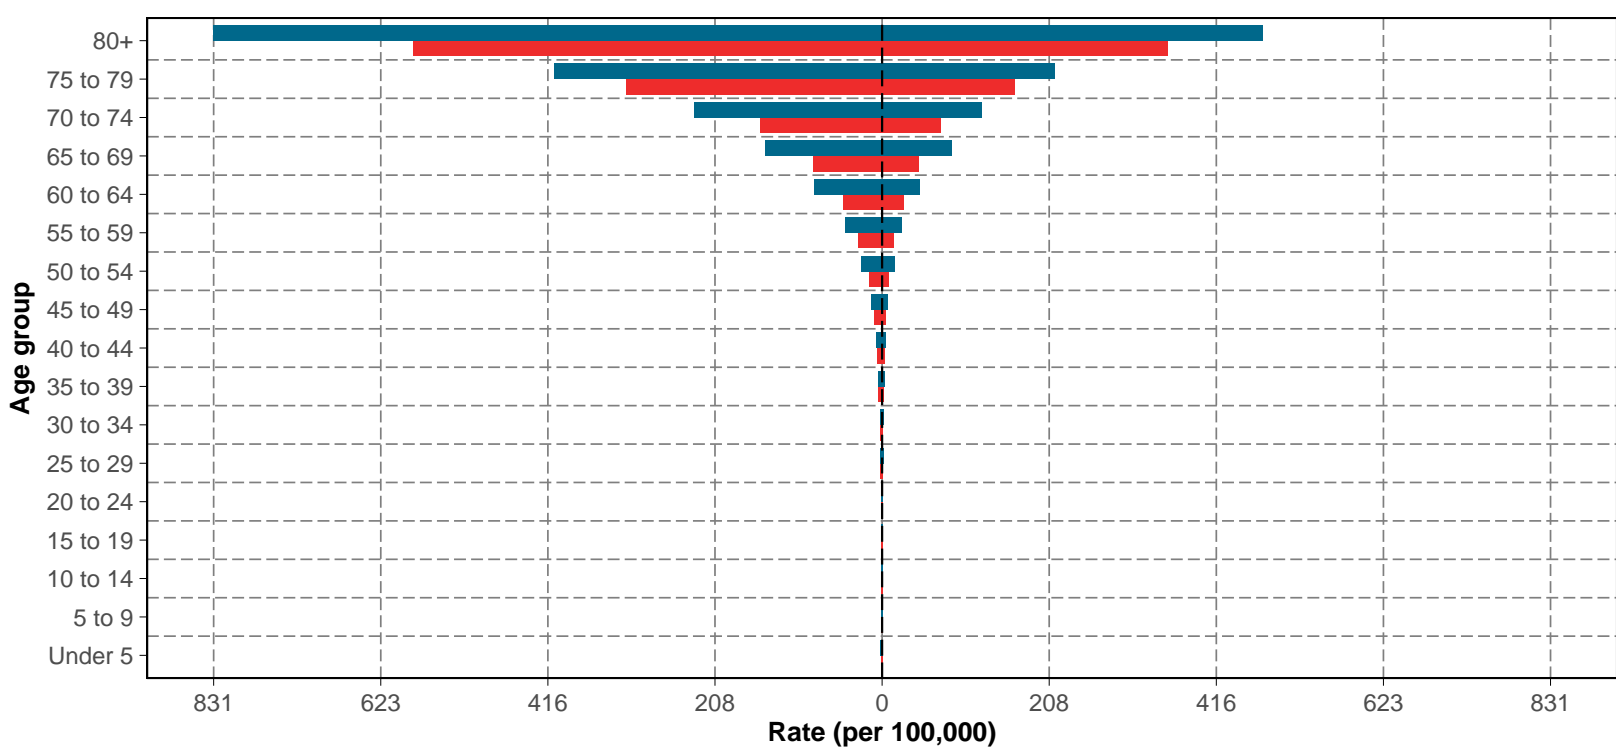

**DALYs**  
1990 2019

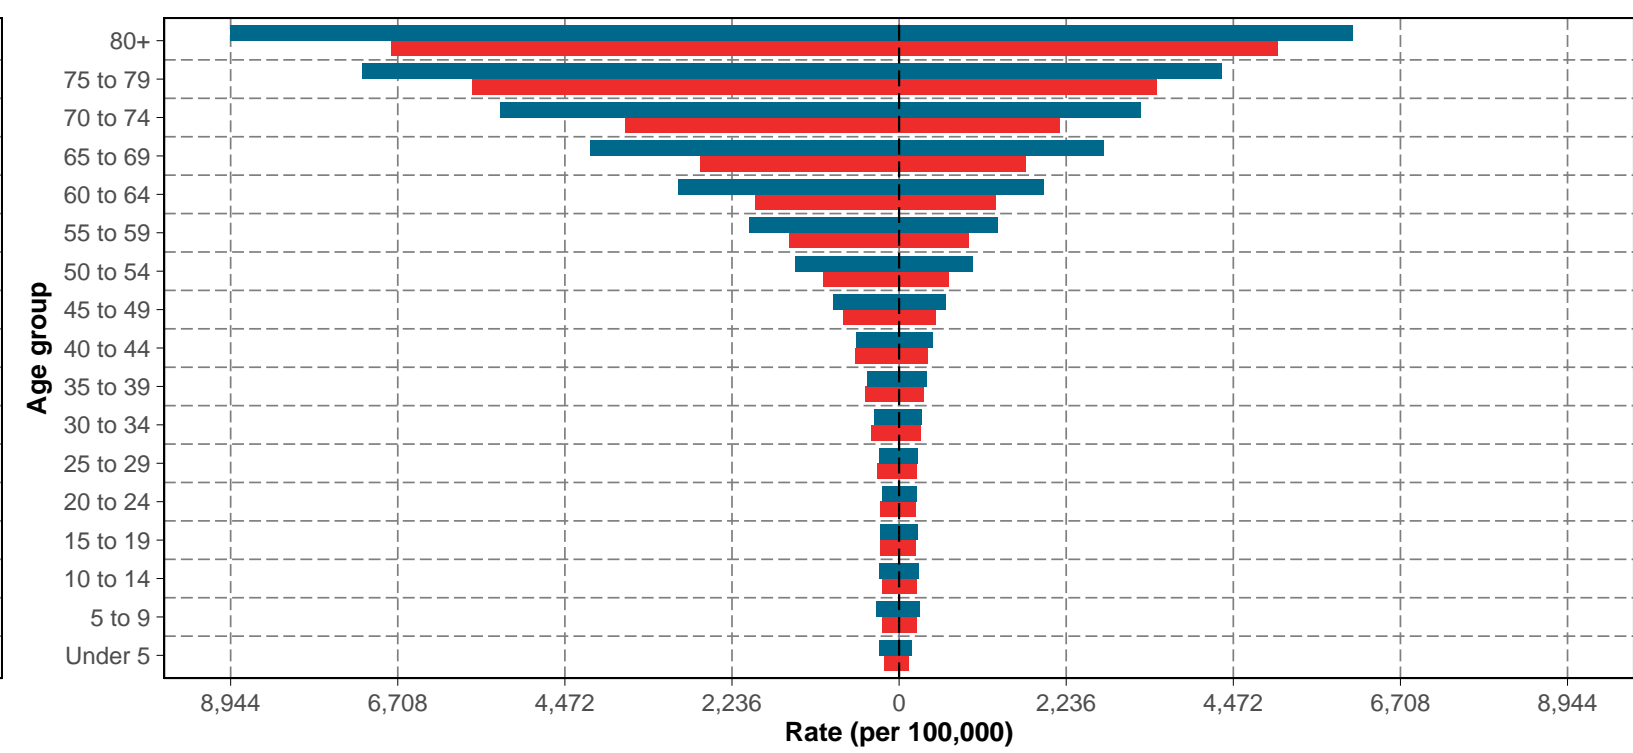

**Sex**  
Female Male



# Kohgiluyeh and Boyer-Ahmad

**Incidence**  
1990 2019

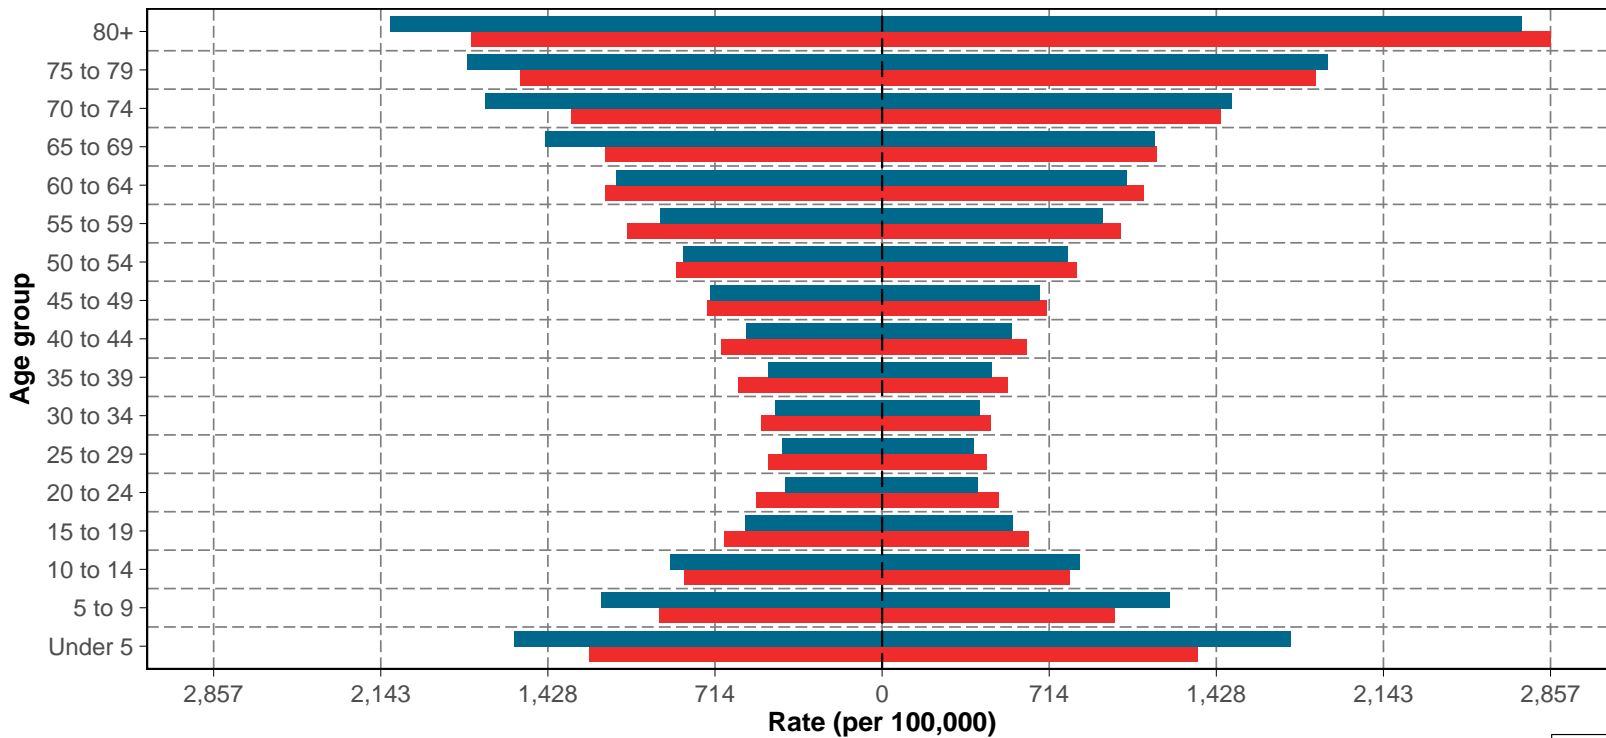

**Prevalence**  
1990 2019

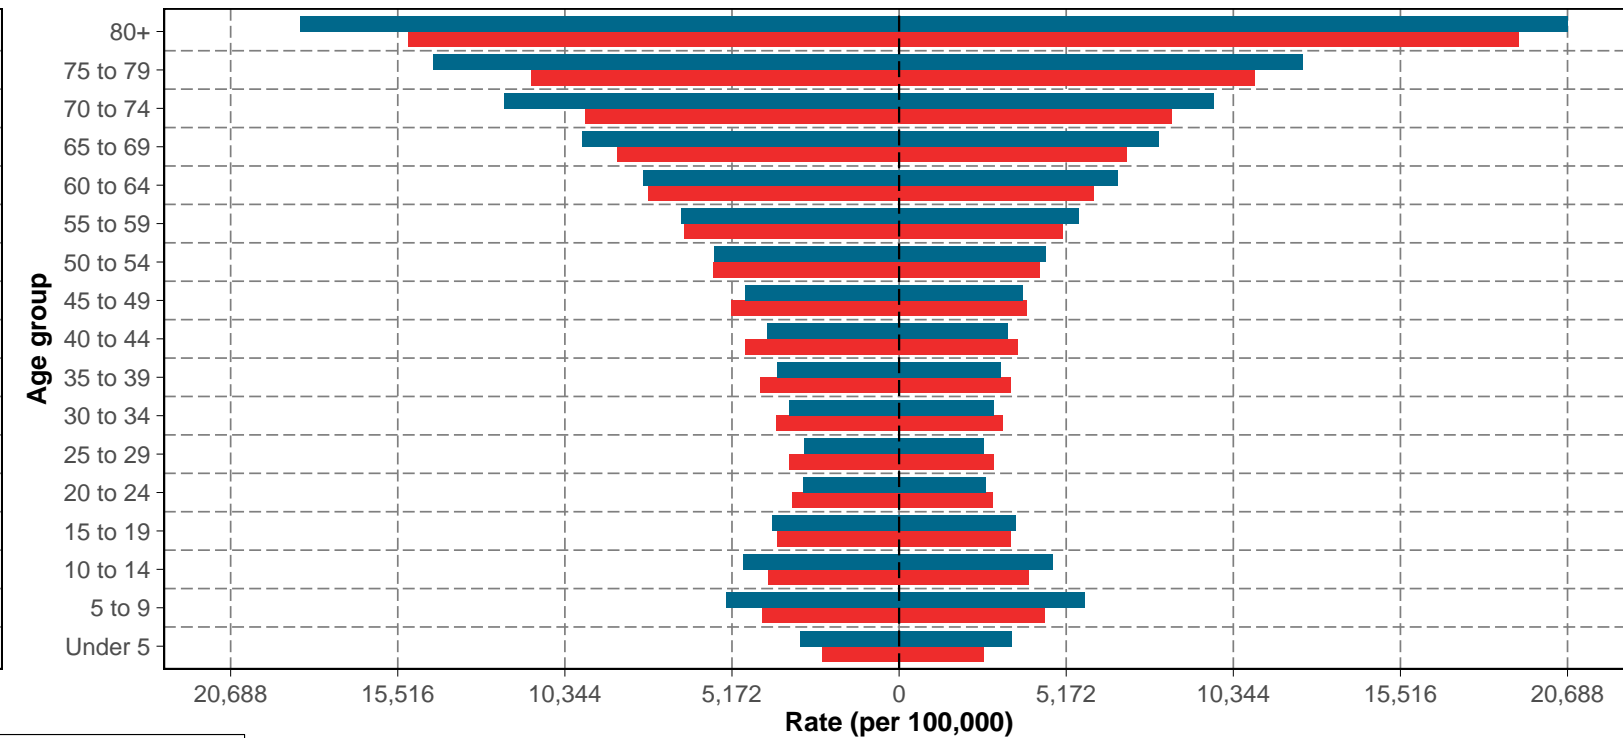

**Deaths**  
1990 2019

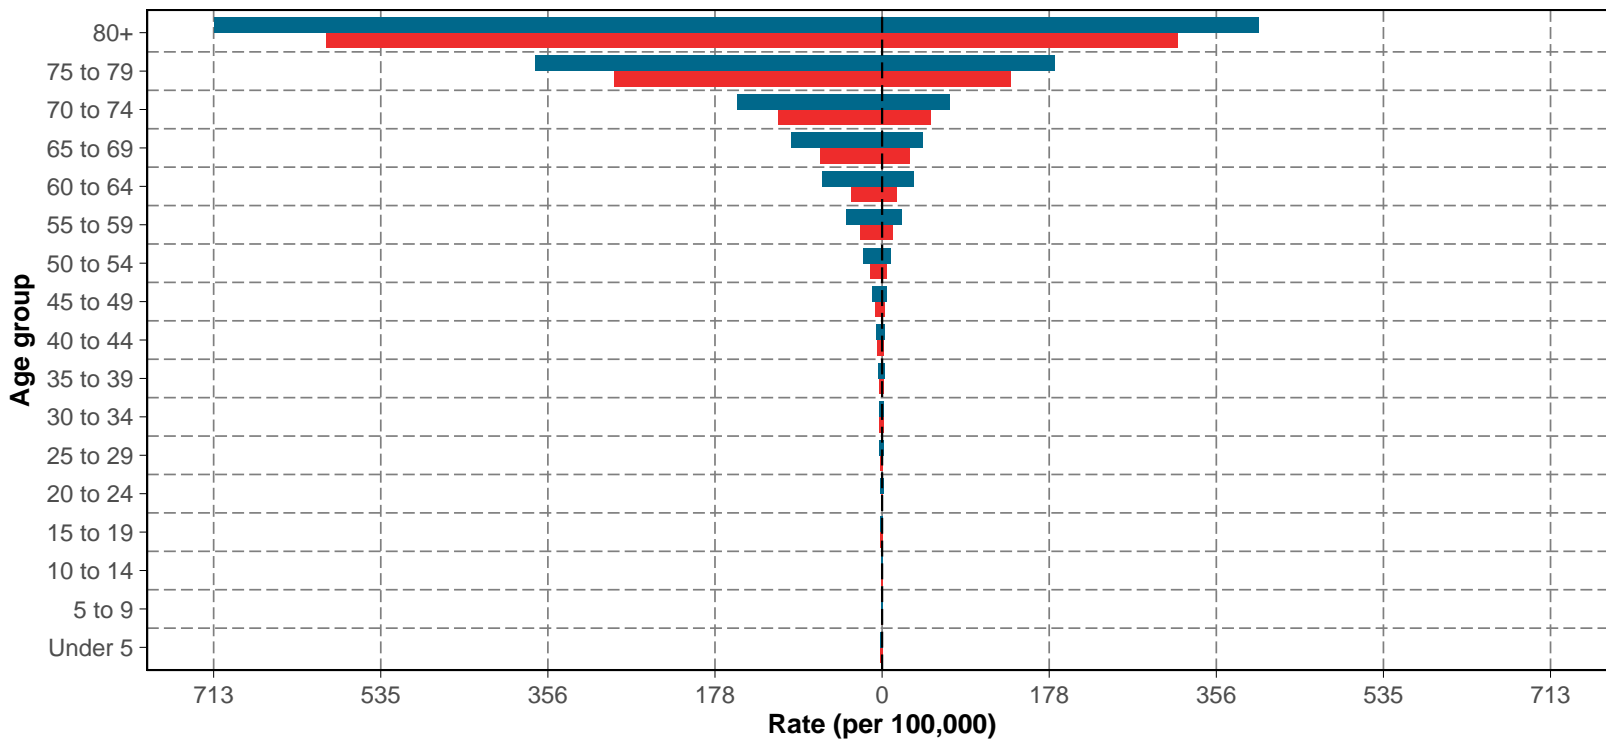

**DALYs**  
1990 2019

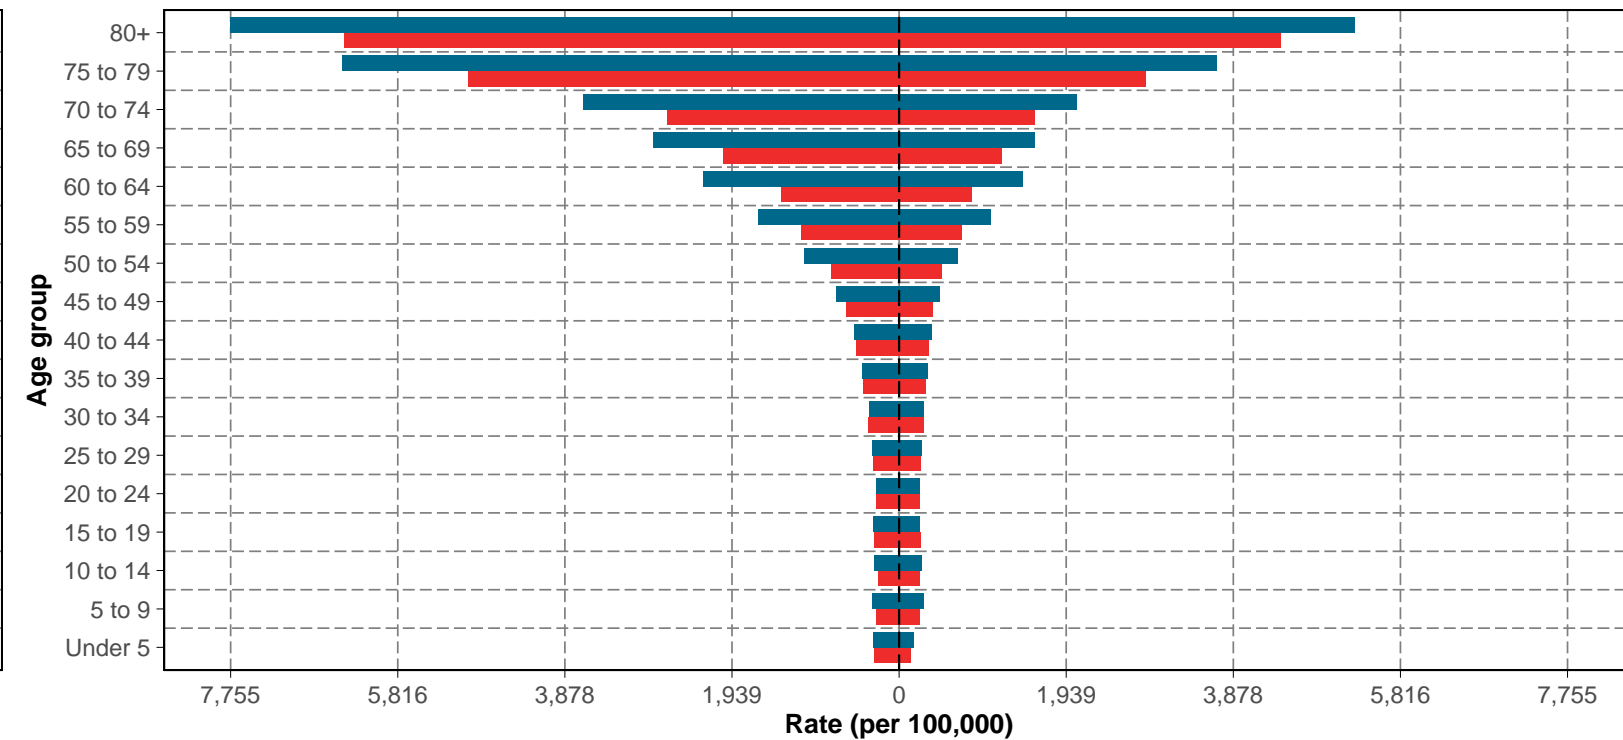

**Sex**  
Female Male

# Kurdistan

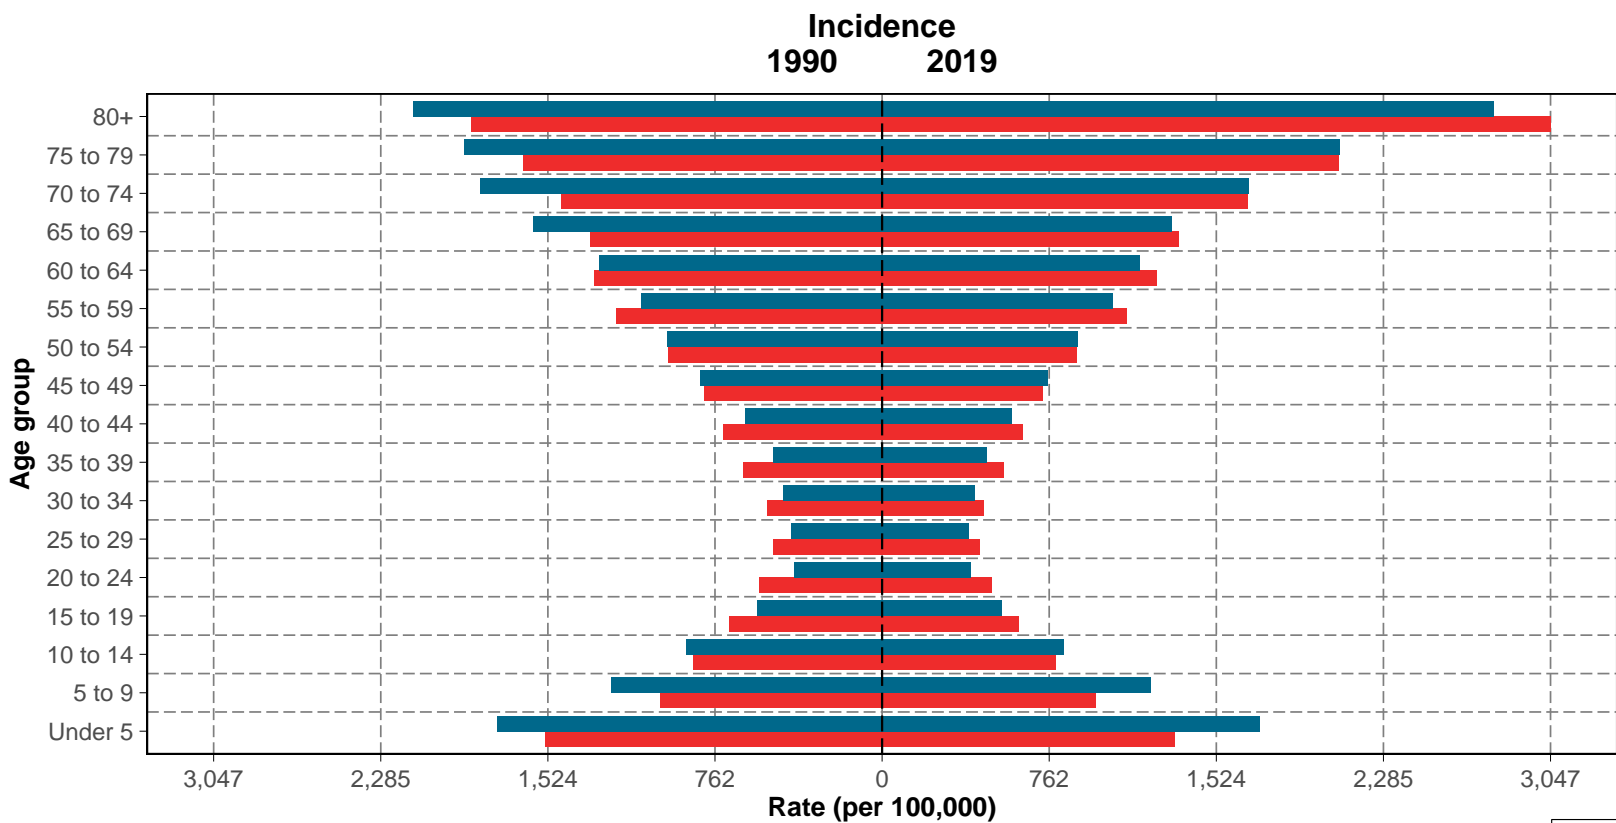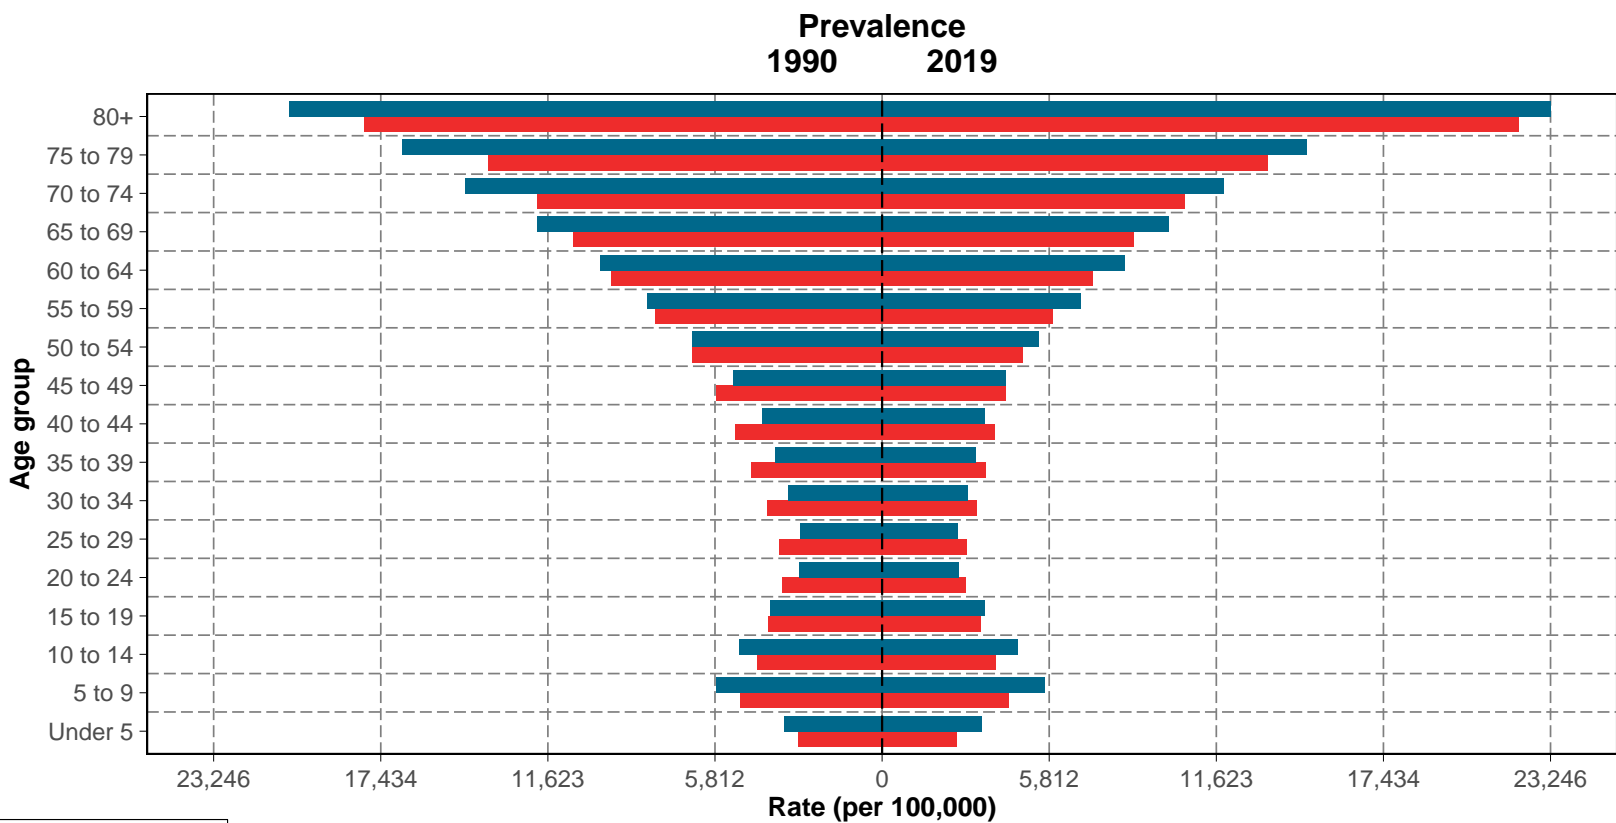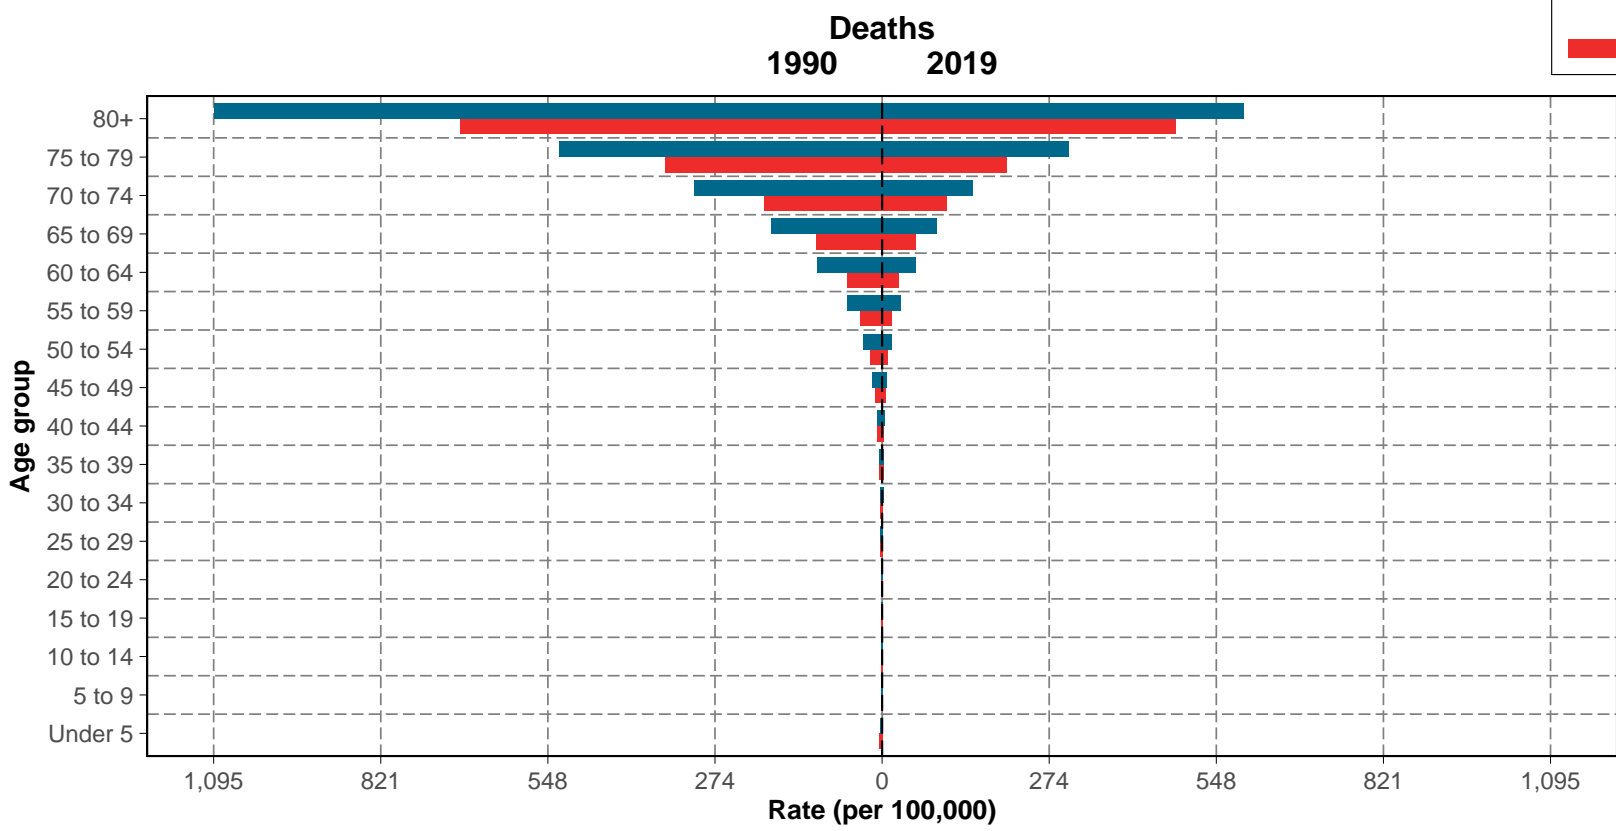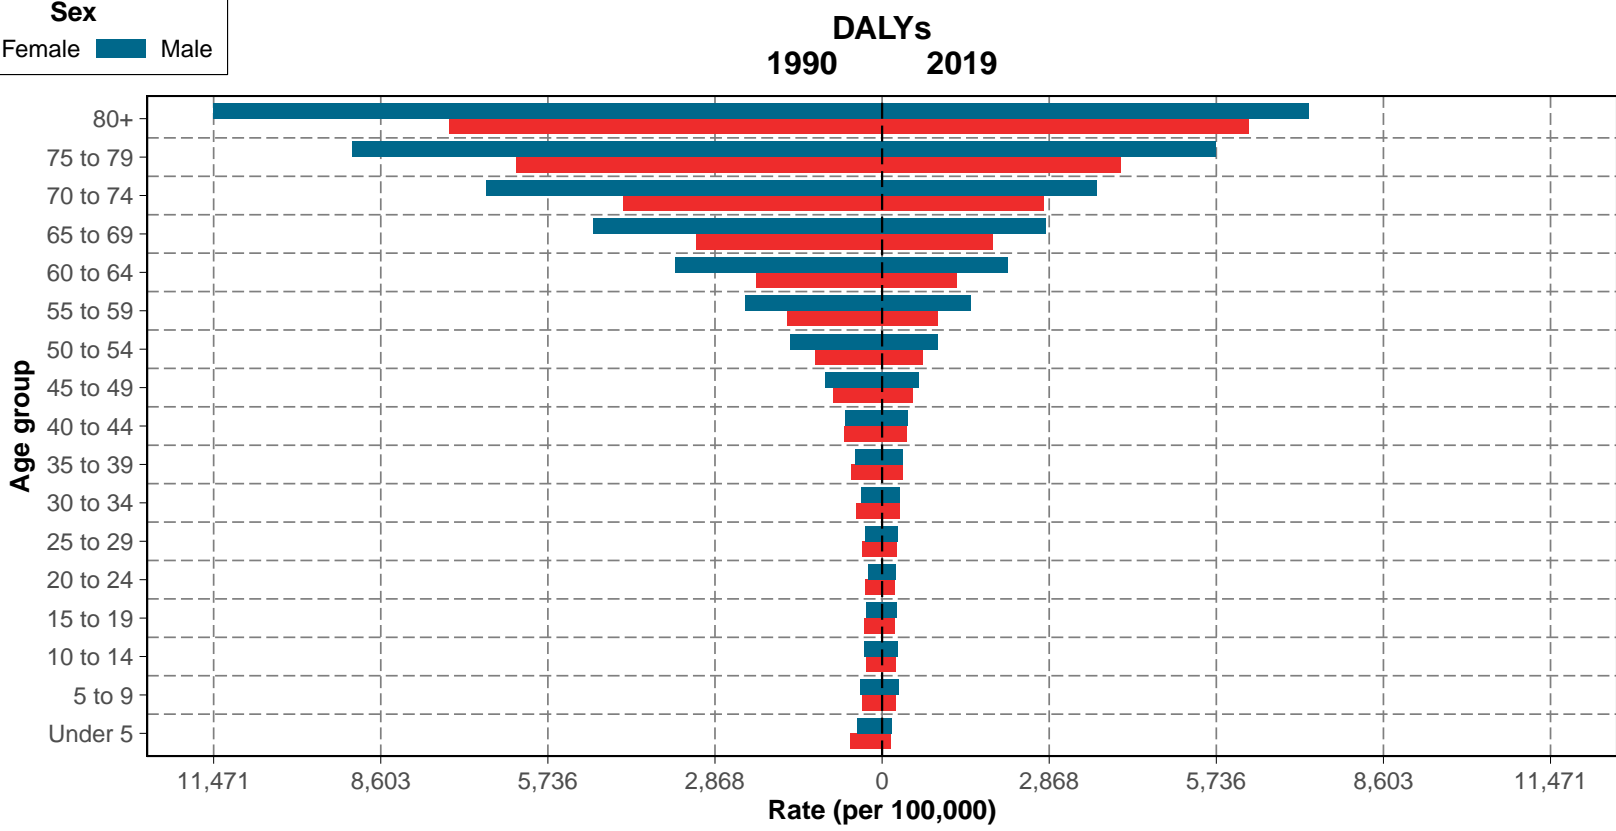

# Lorestan

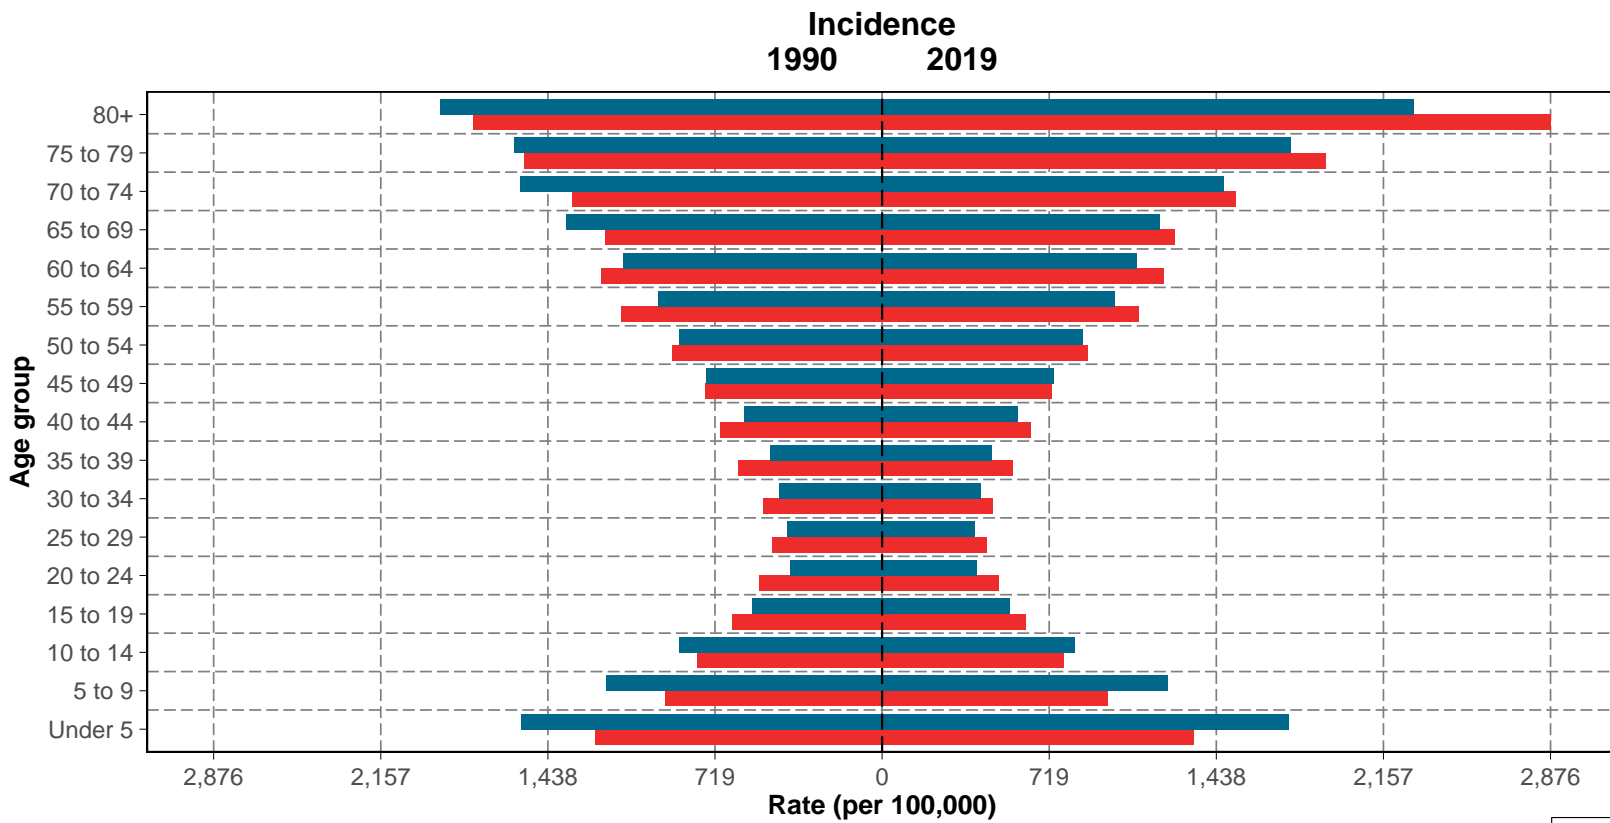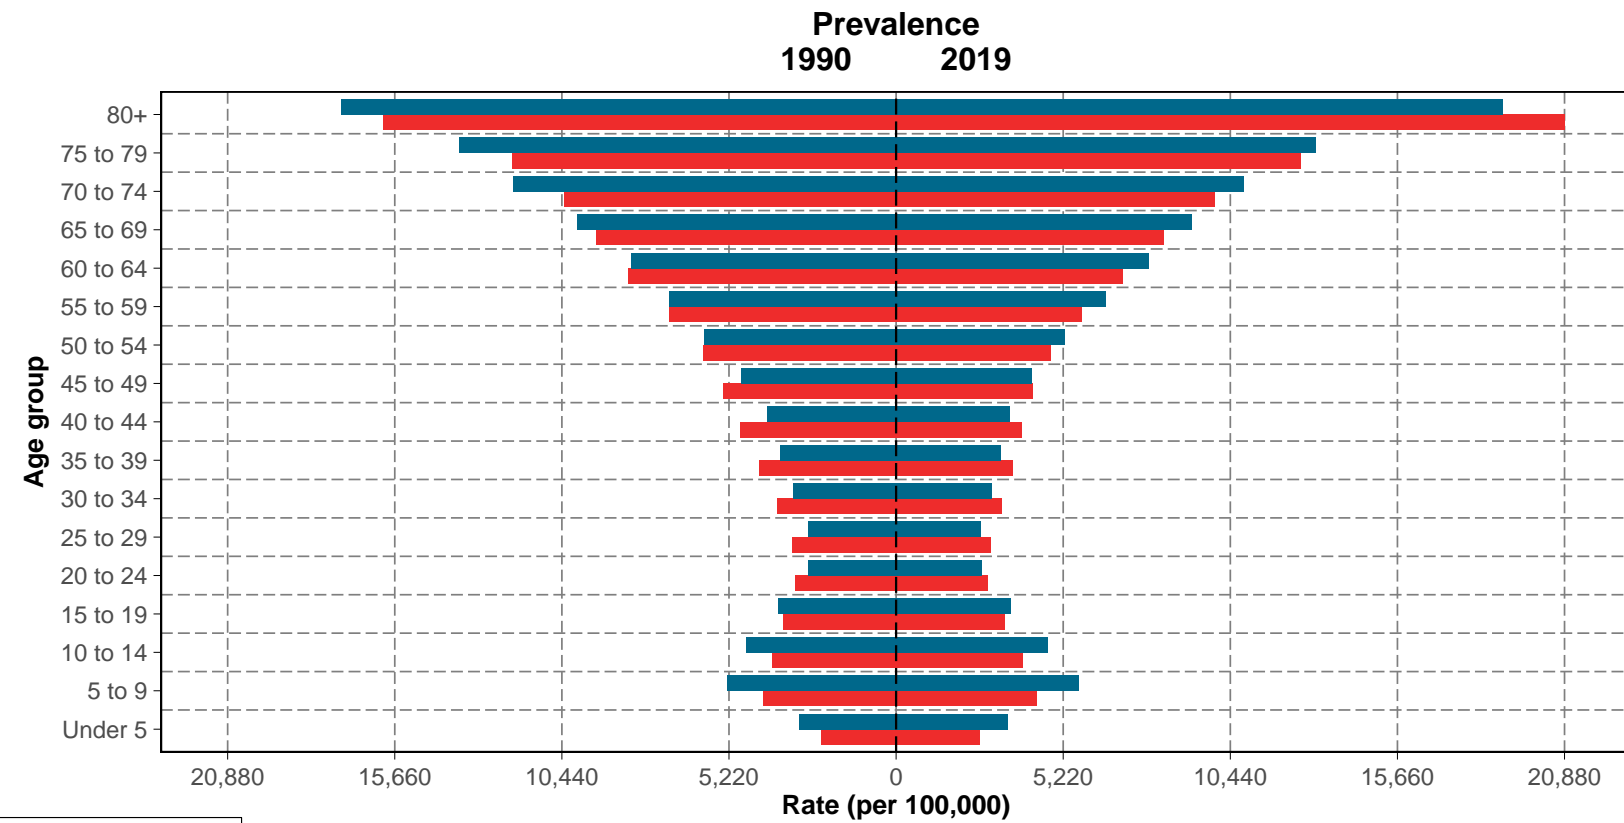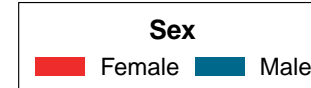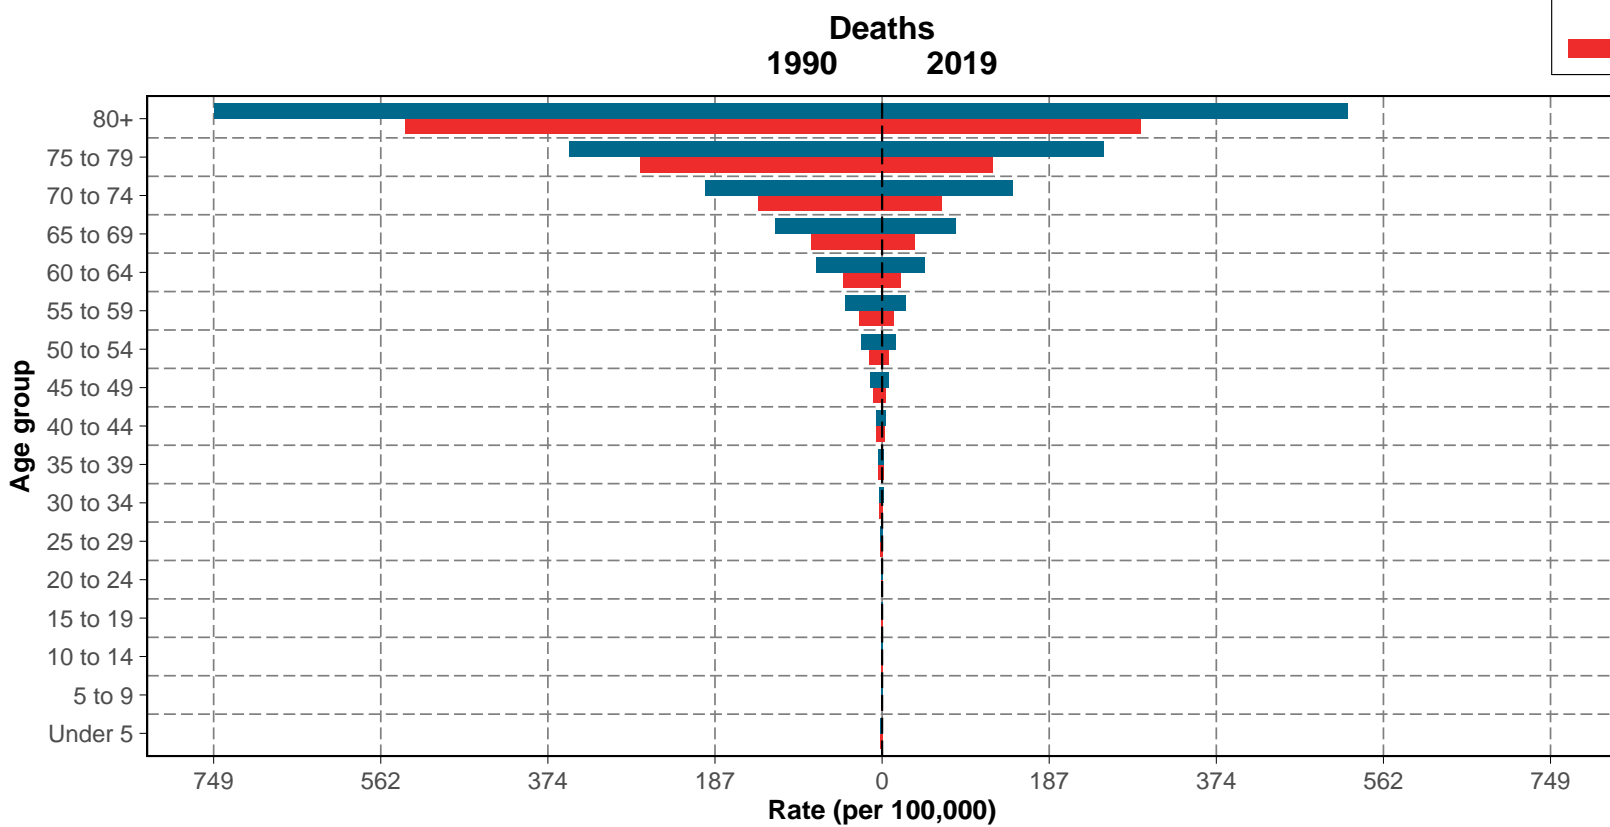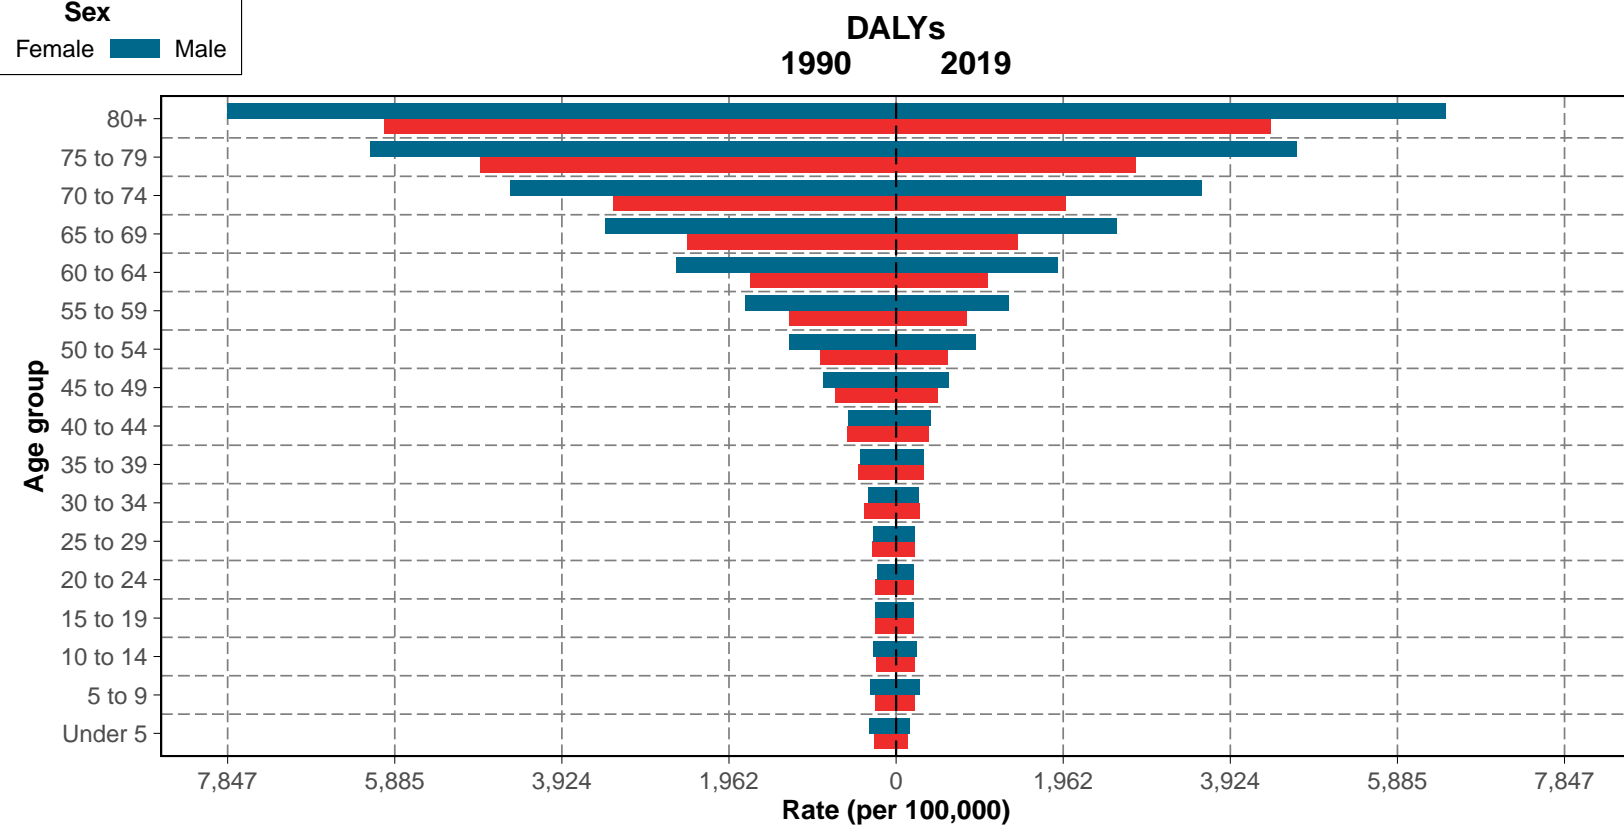

# Markazi

**Incidence**  
1990 2019

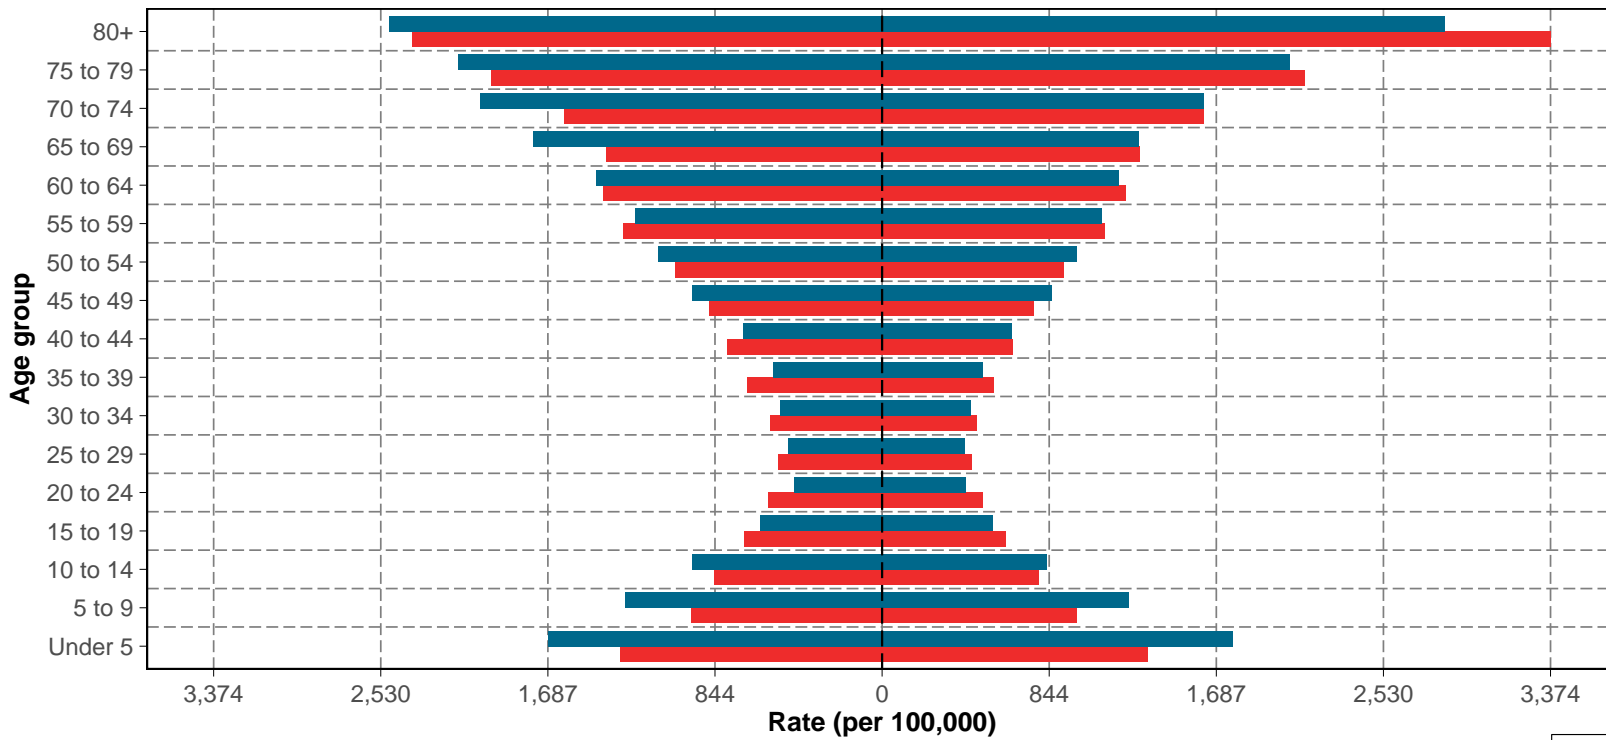

**Prevalence**  
1990 2019

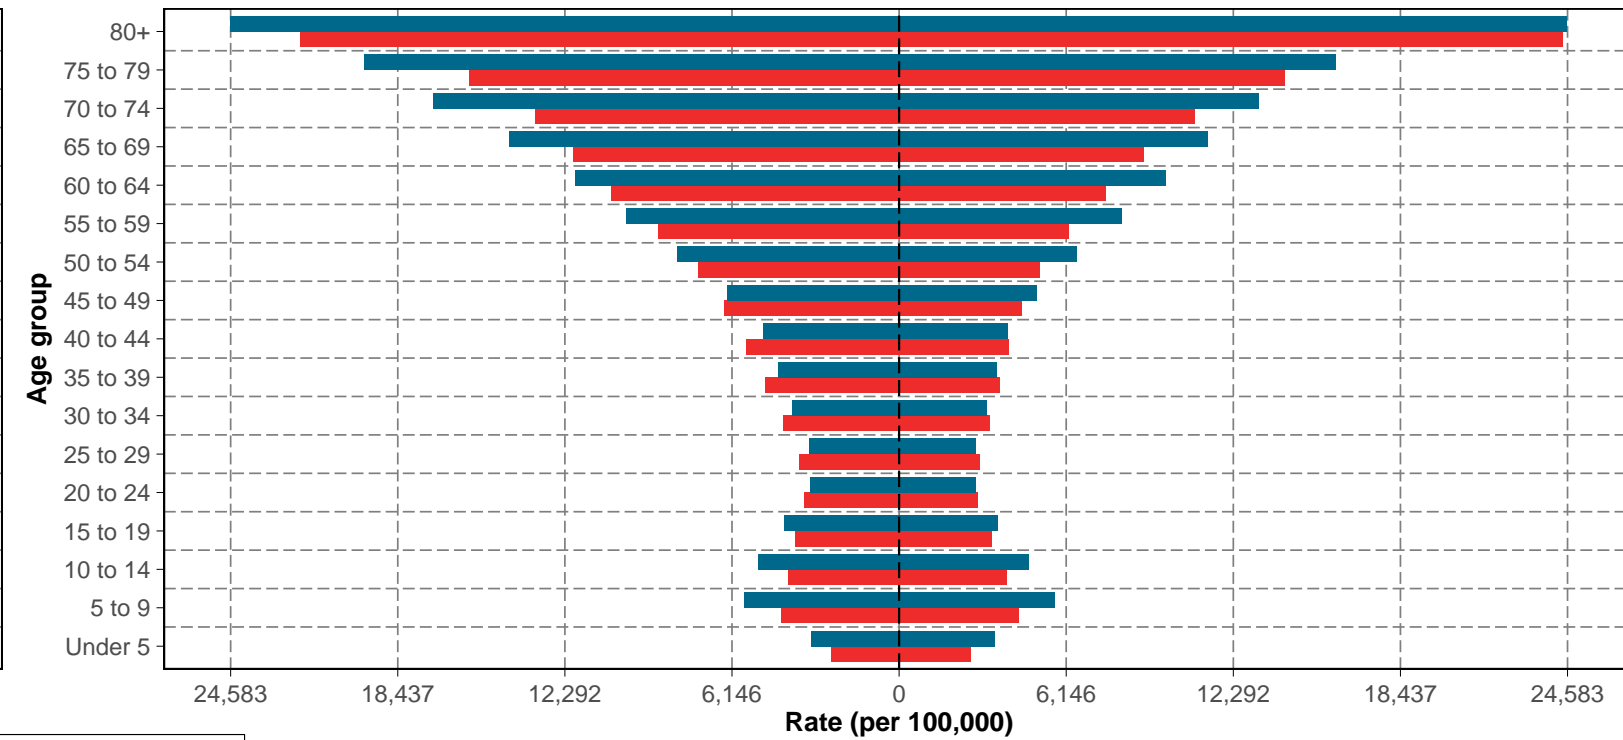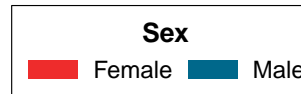

**Deaths**  
1990 2019

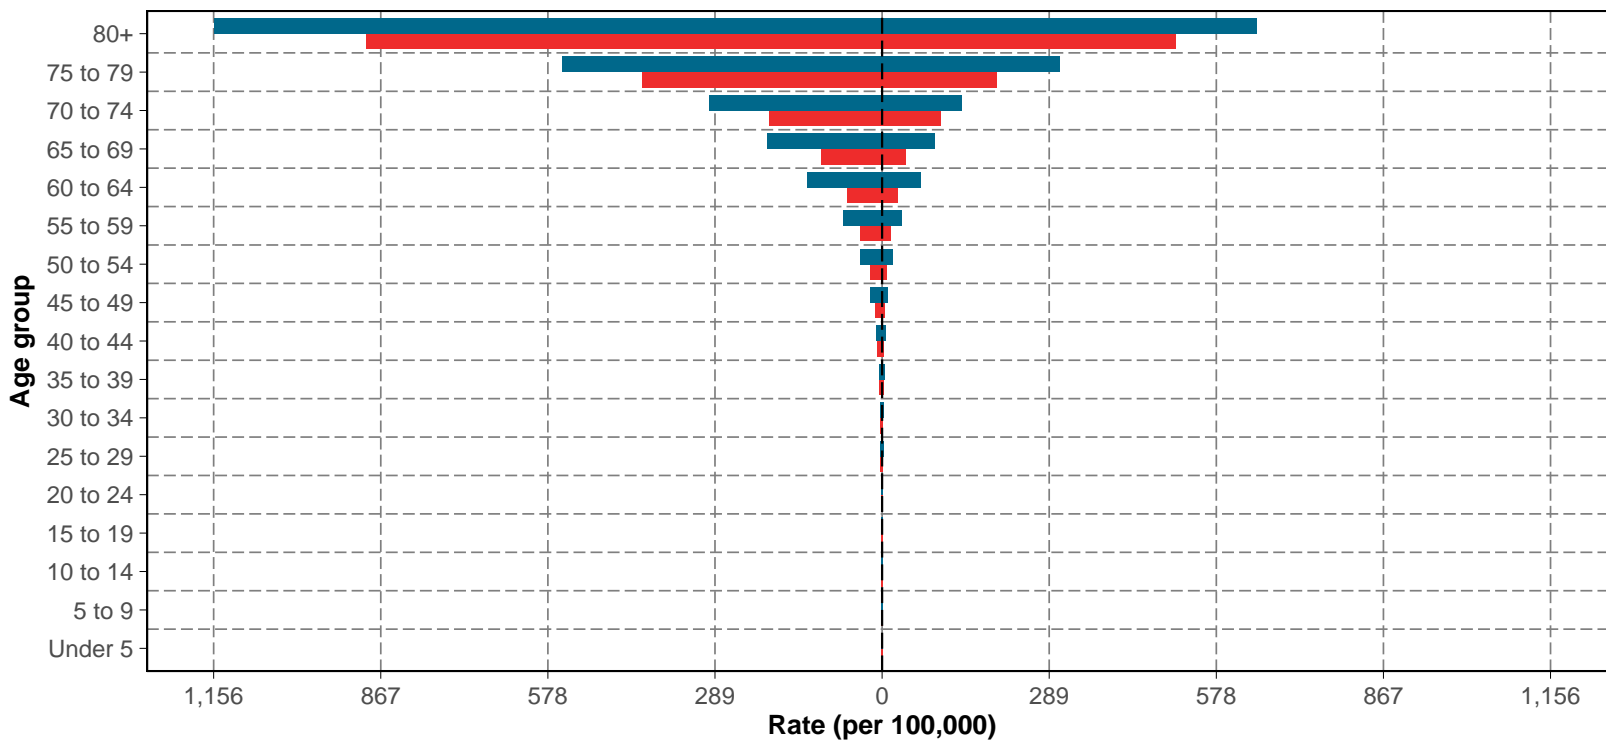

**DALYs**  
1990 2019

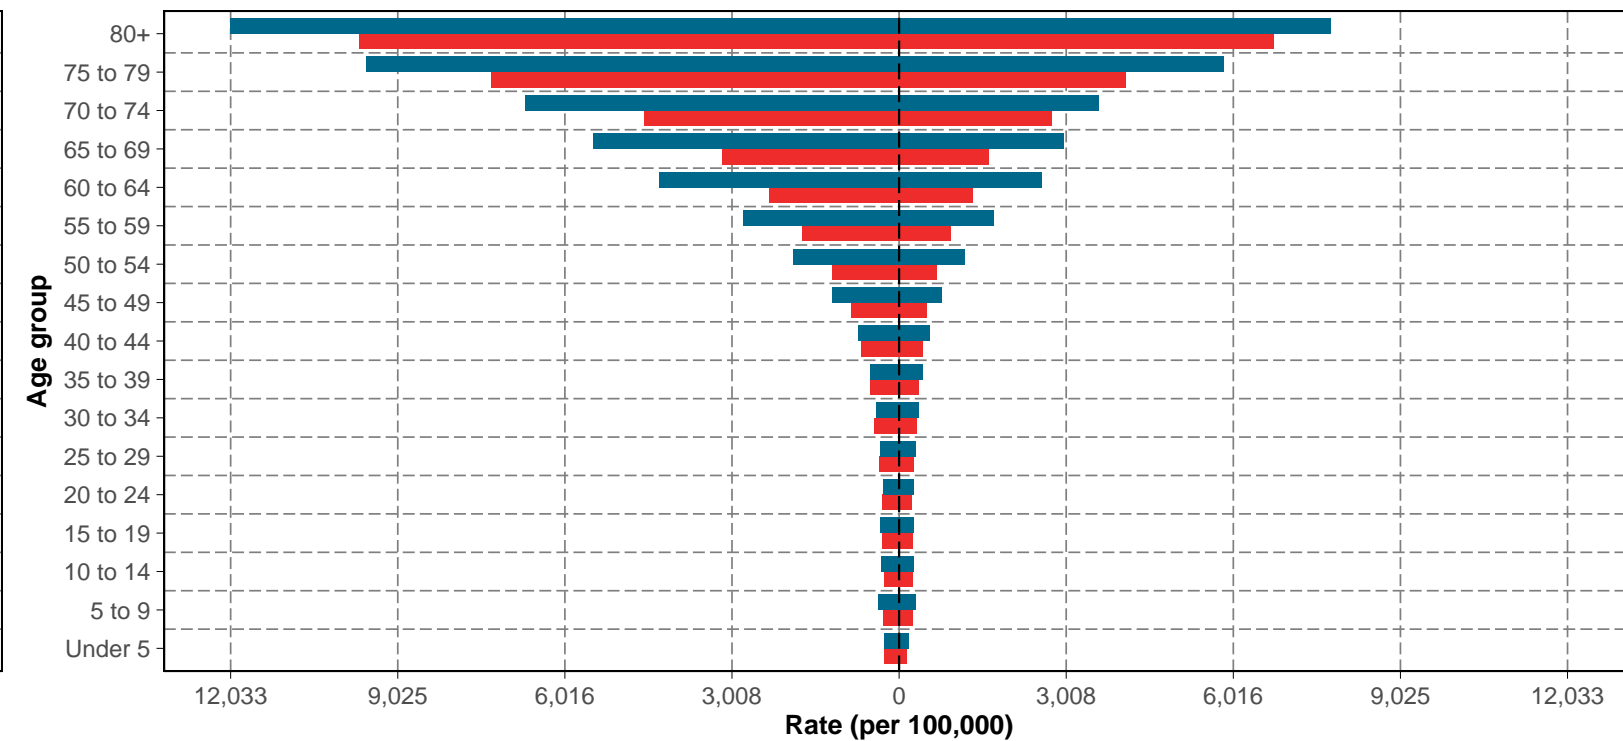

# Mazandaran

**Incidence**  
1990 2019

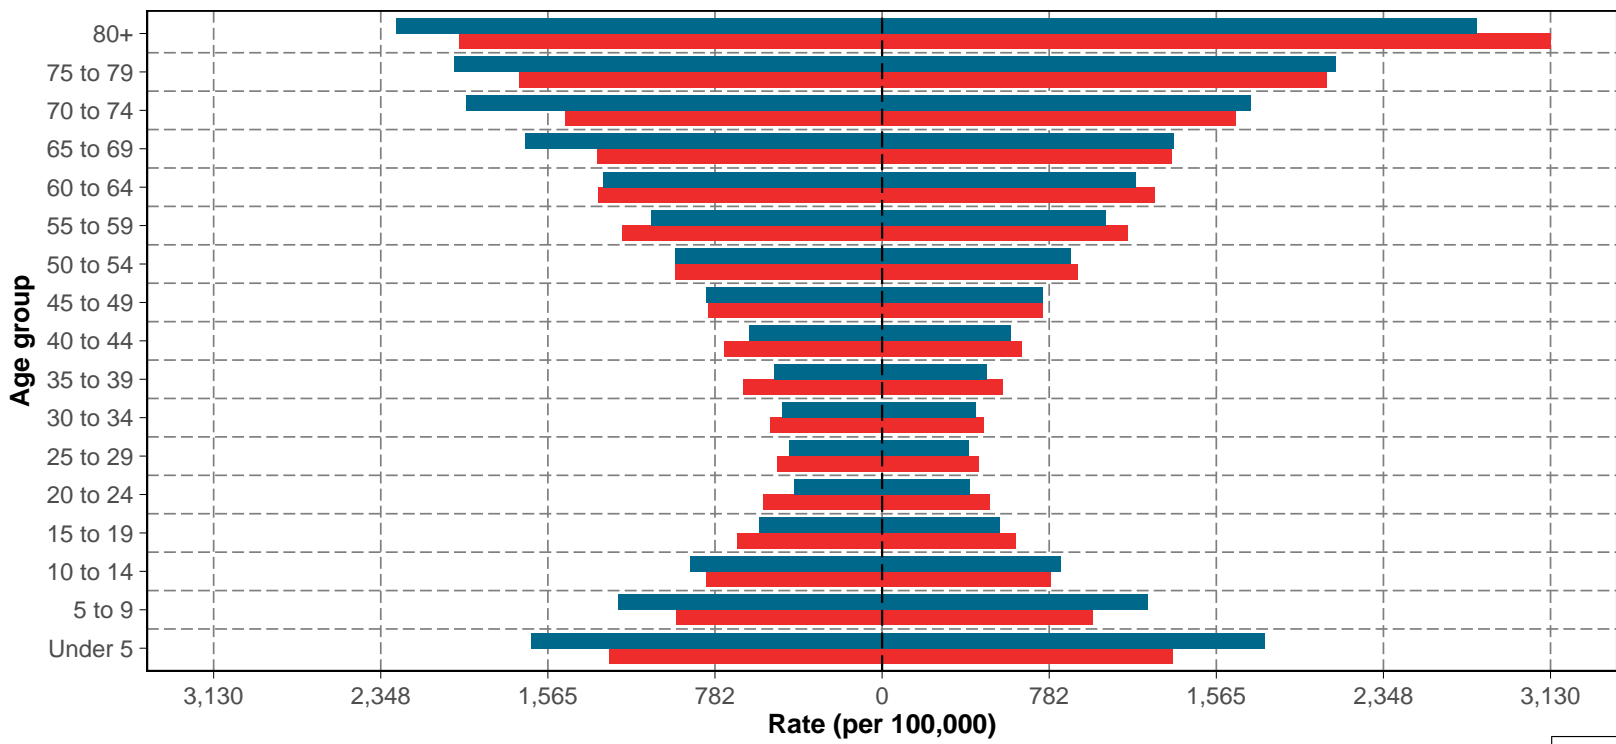

**Prevalence**  
1990 2019

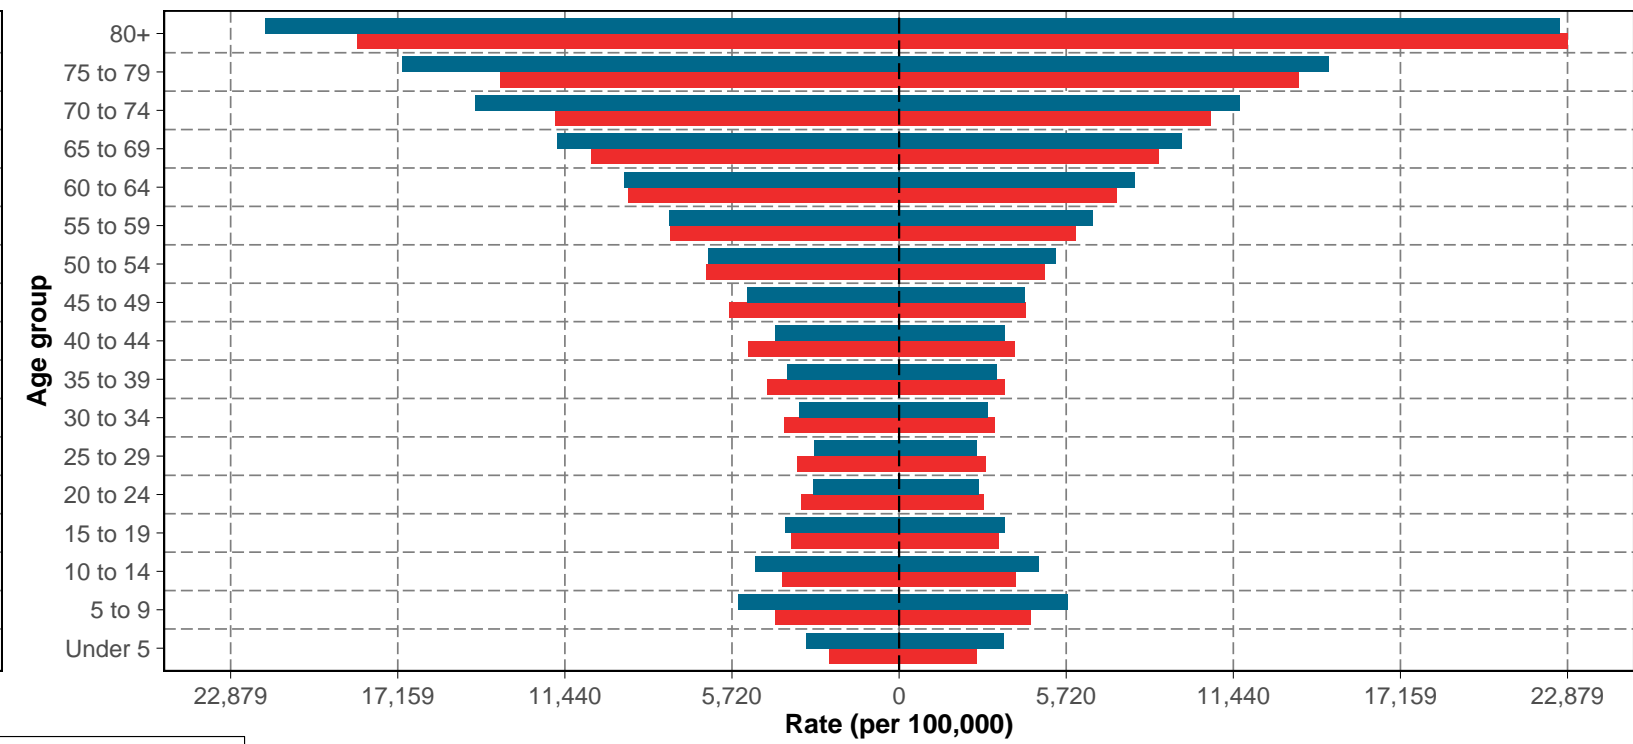

**Deaths**  
1990 2019

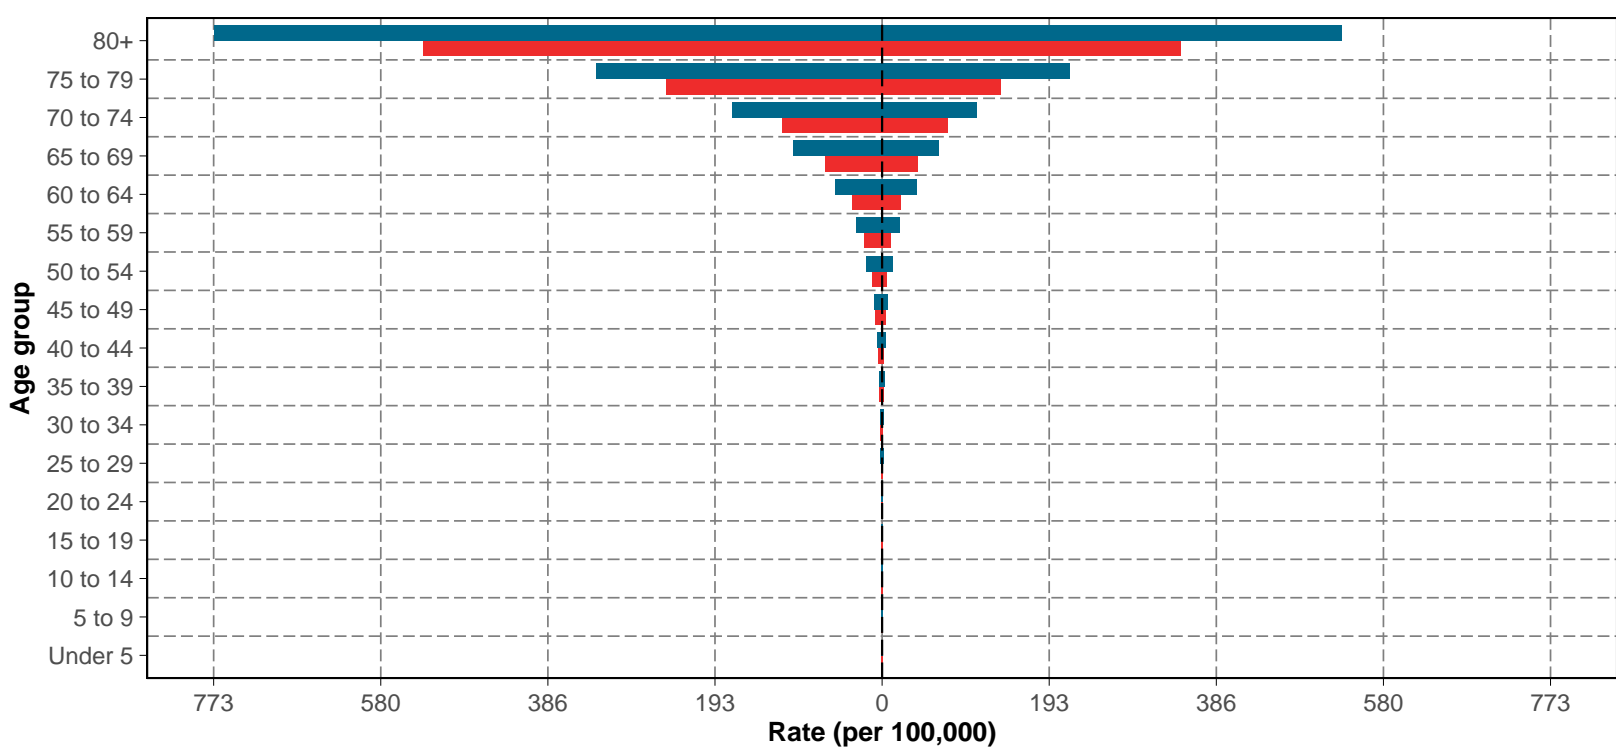

**DALYs**  
1990 2019

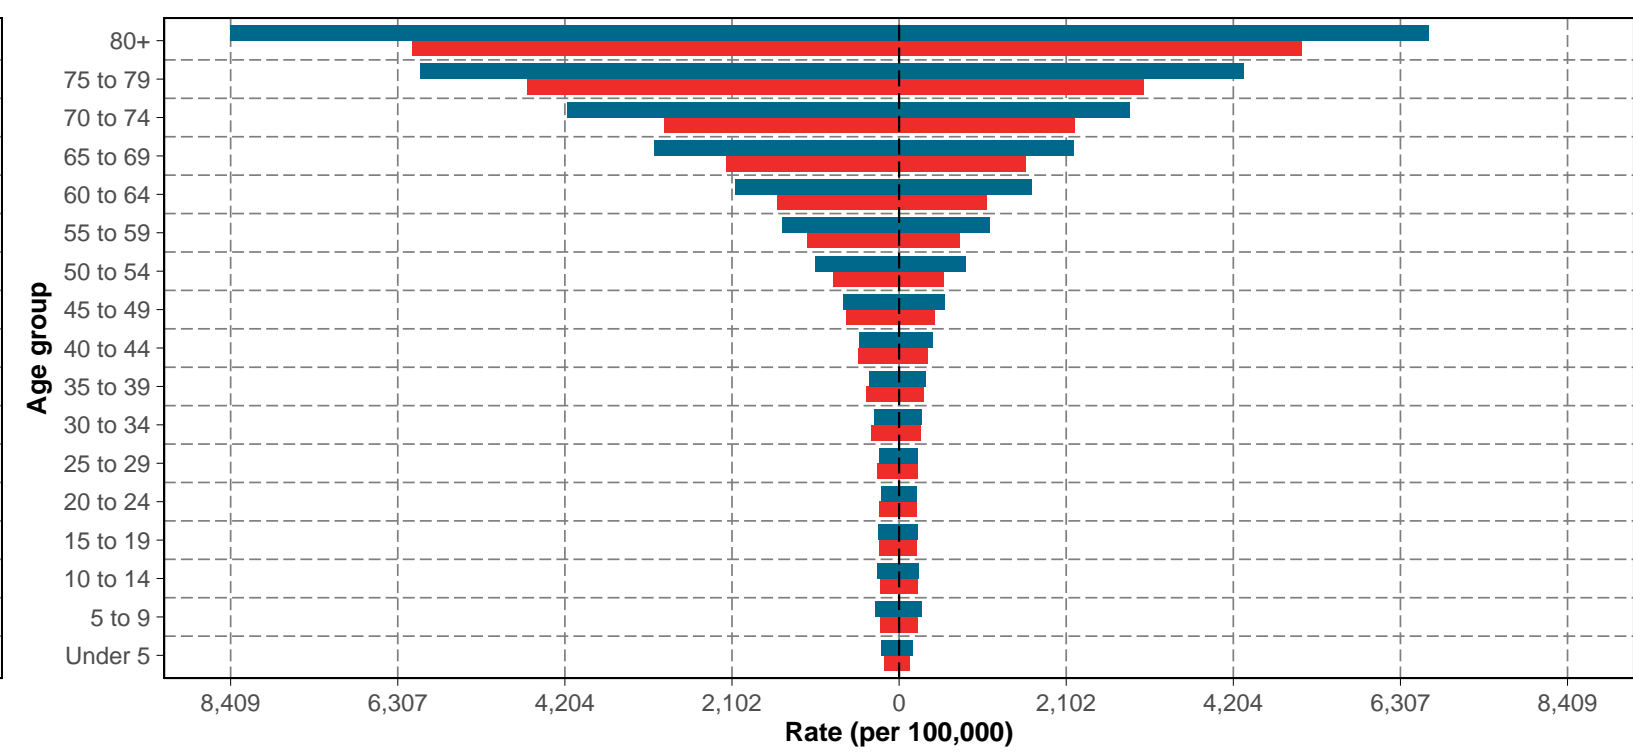

**Sex**  
Female Male

# North Khorasan

**Incidence**  
1990 2019

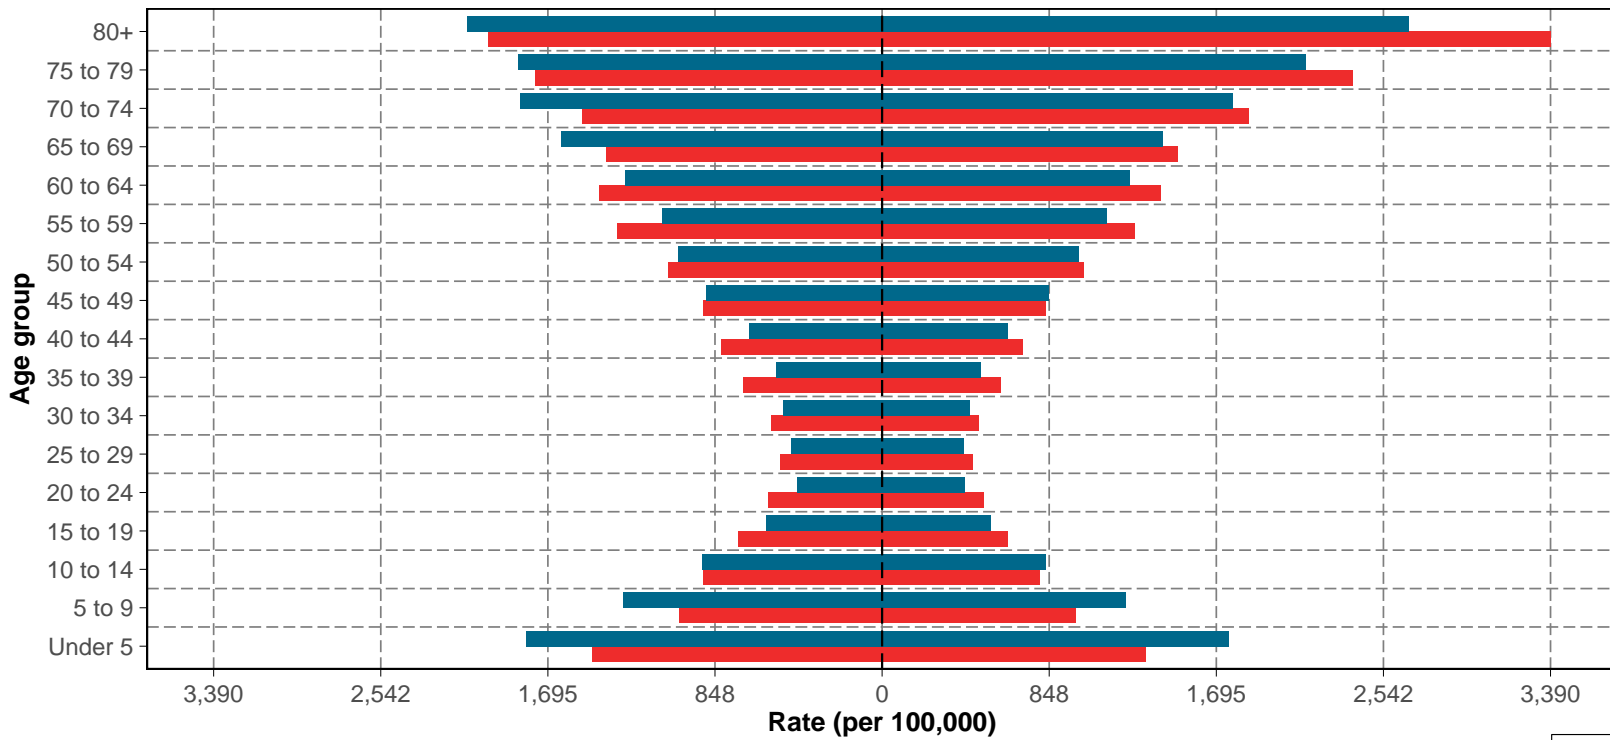

**Prevalence**  
1990 2019

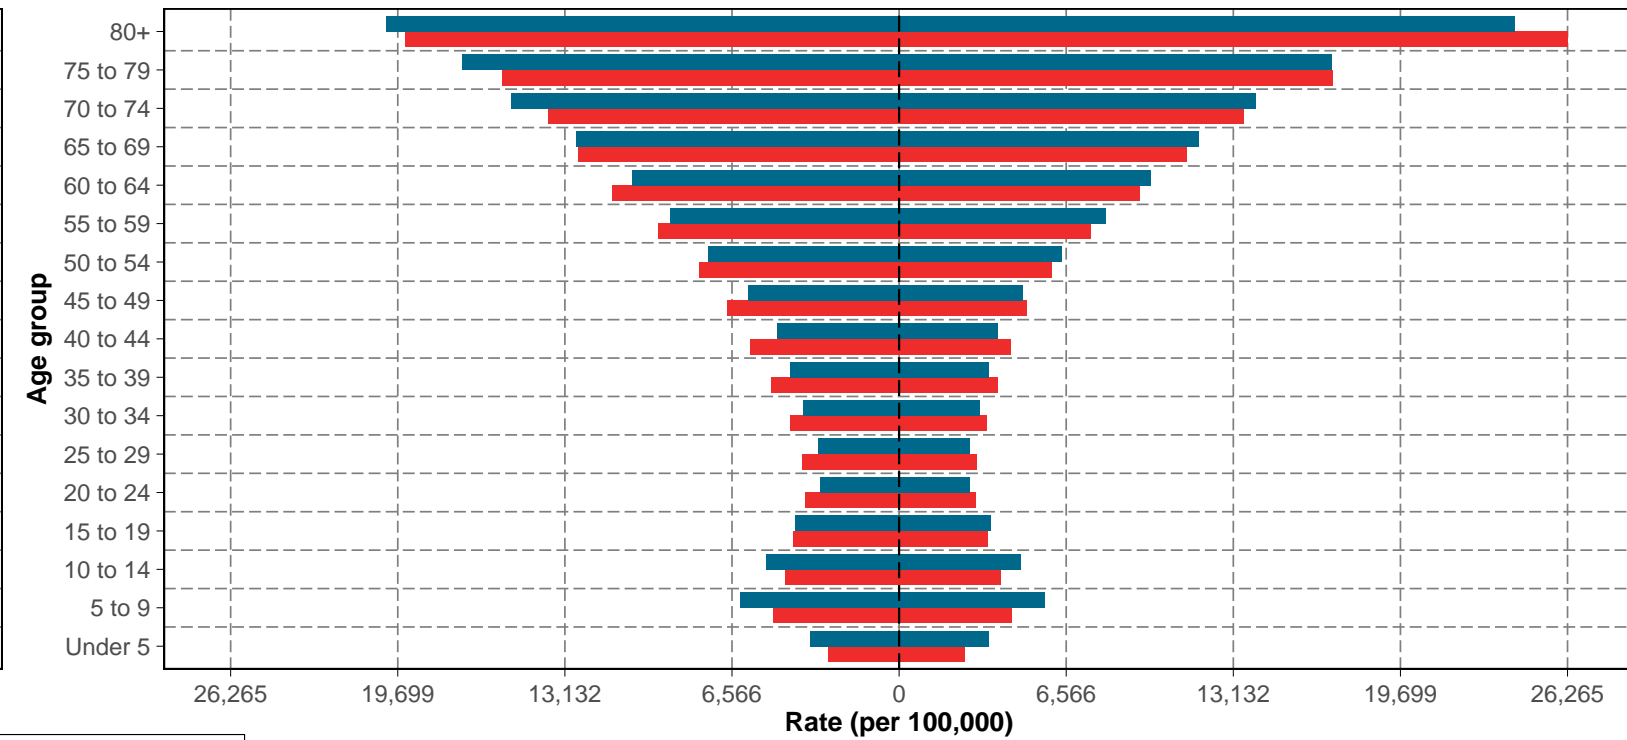

**Deaths**  
1990 2019

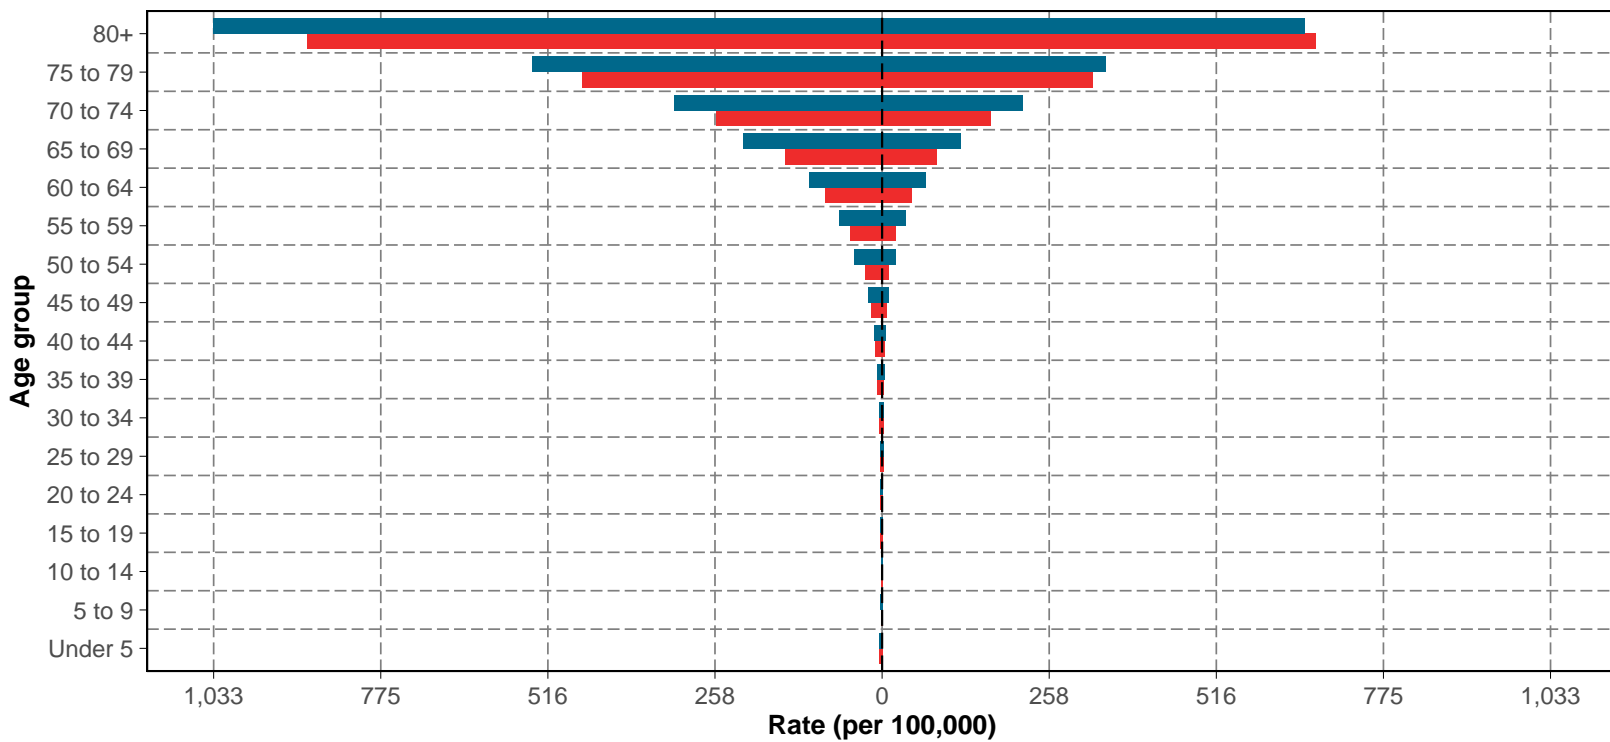

**DALYs**  
1990 2019

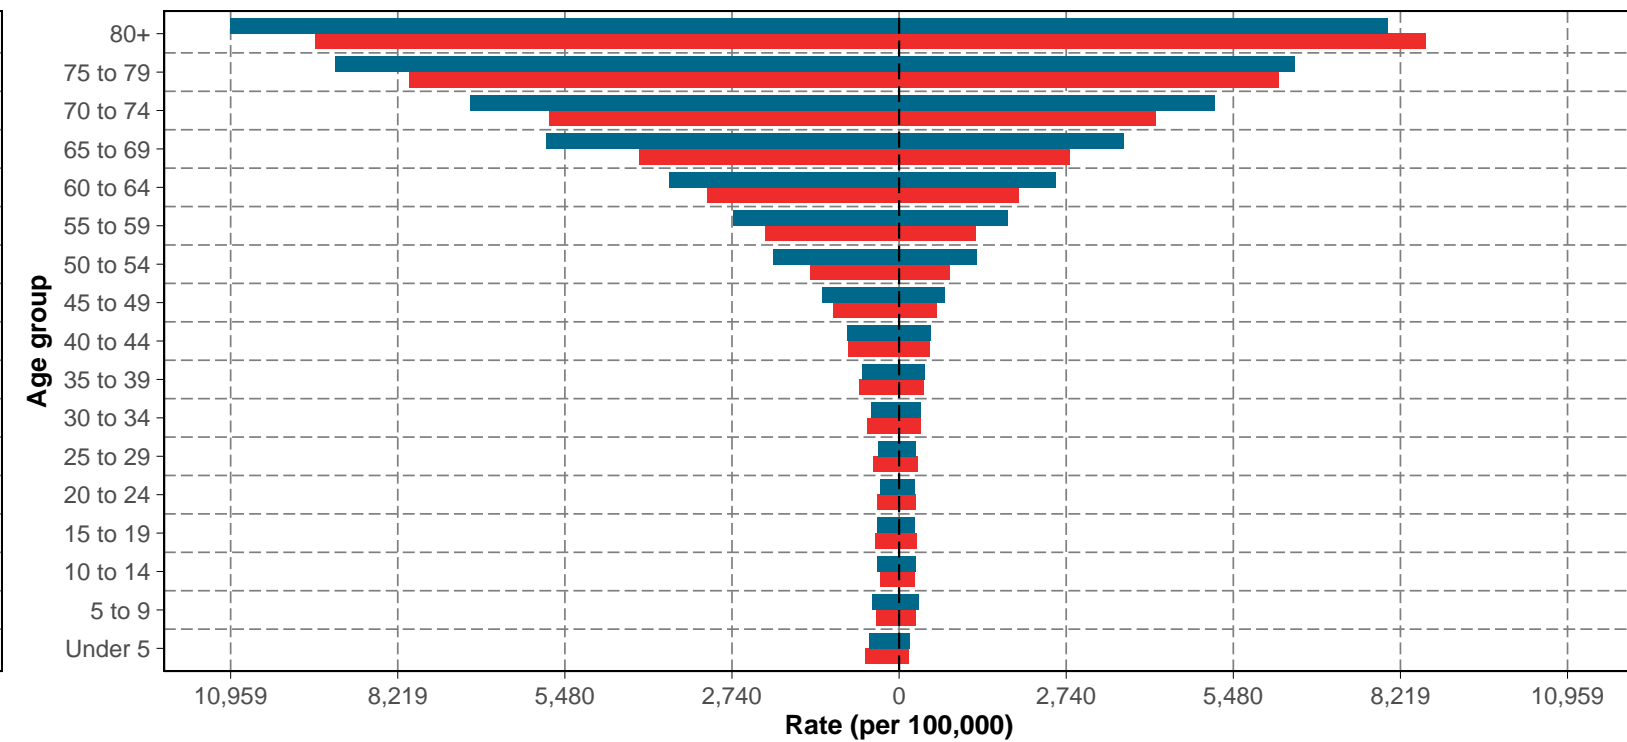

**Sex**  
Female Male

# Qazvin

**Incidence**  
1990 2019

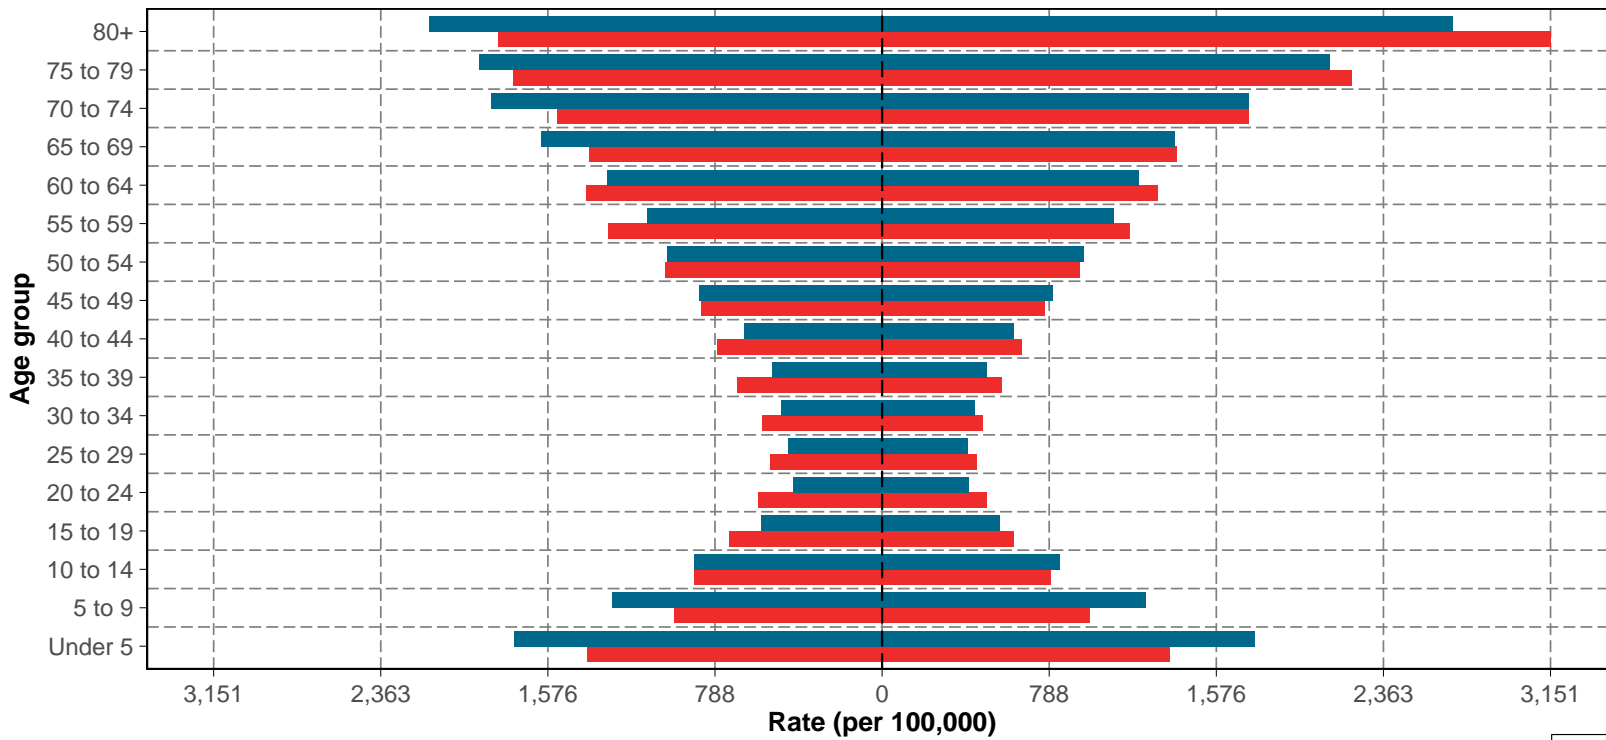

**Prevalence**  
1990 2019

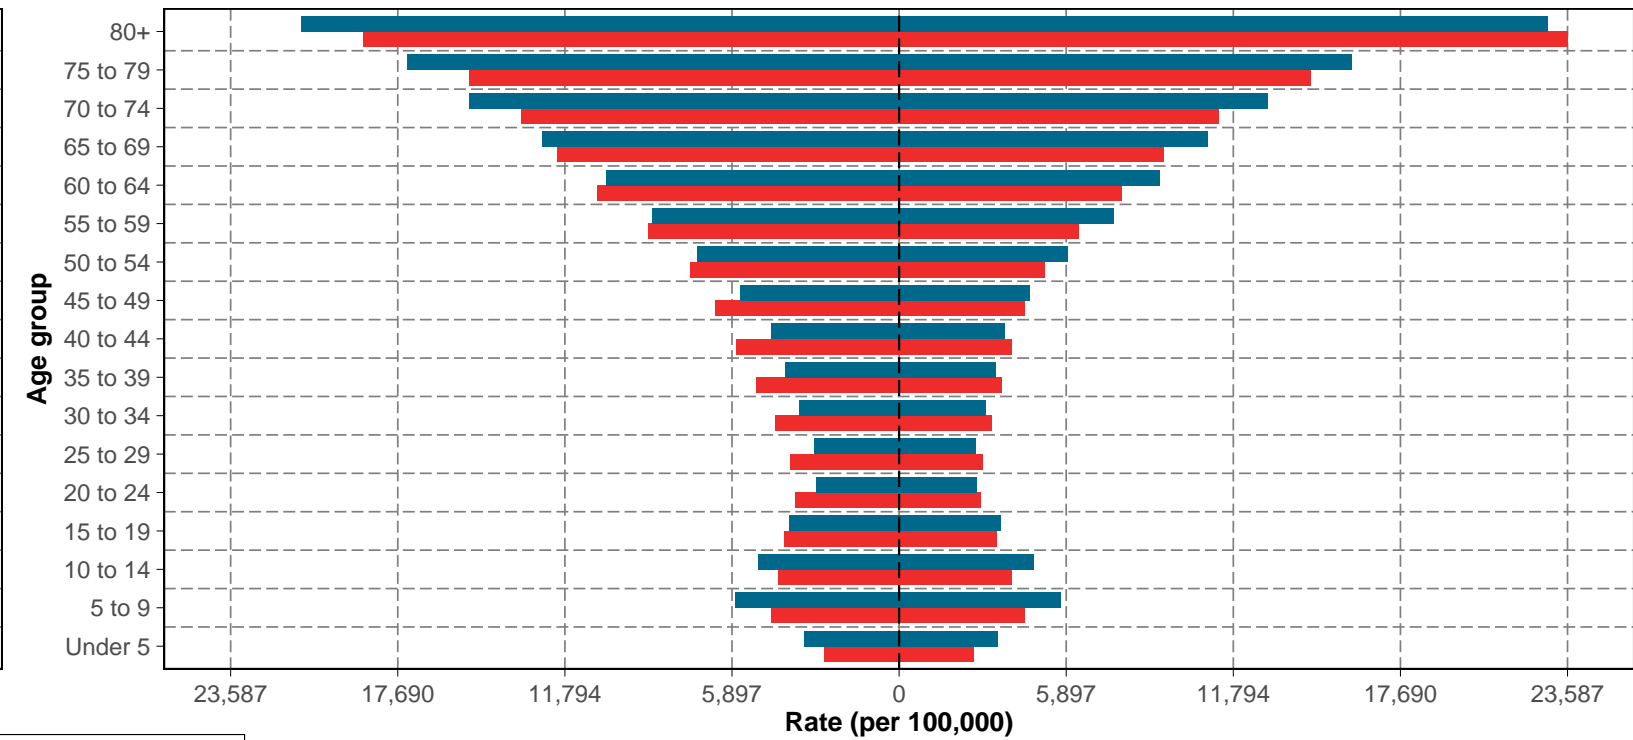

**Sex**  
Female Male

**Deaths**  
1990 2019

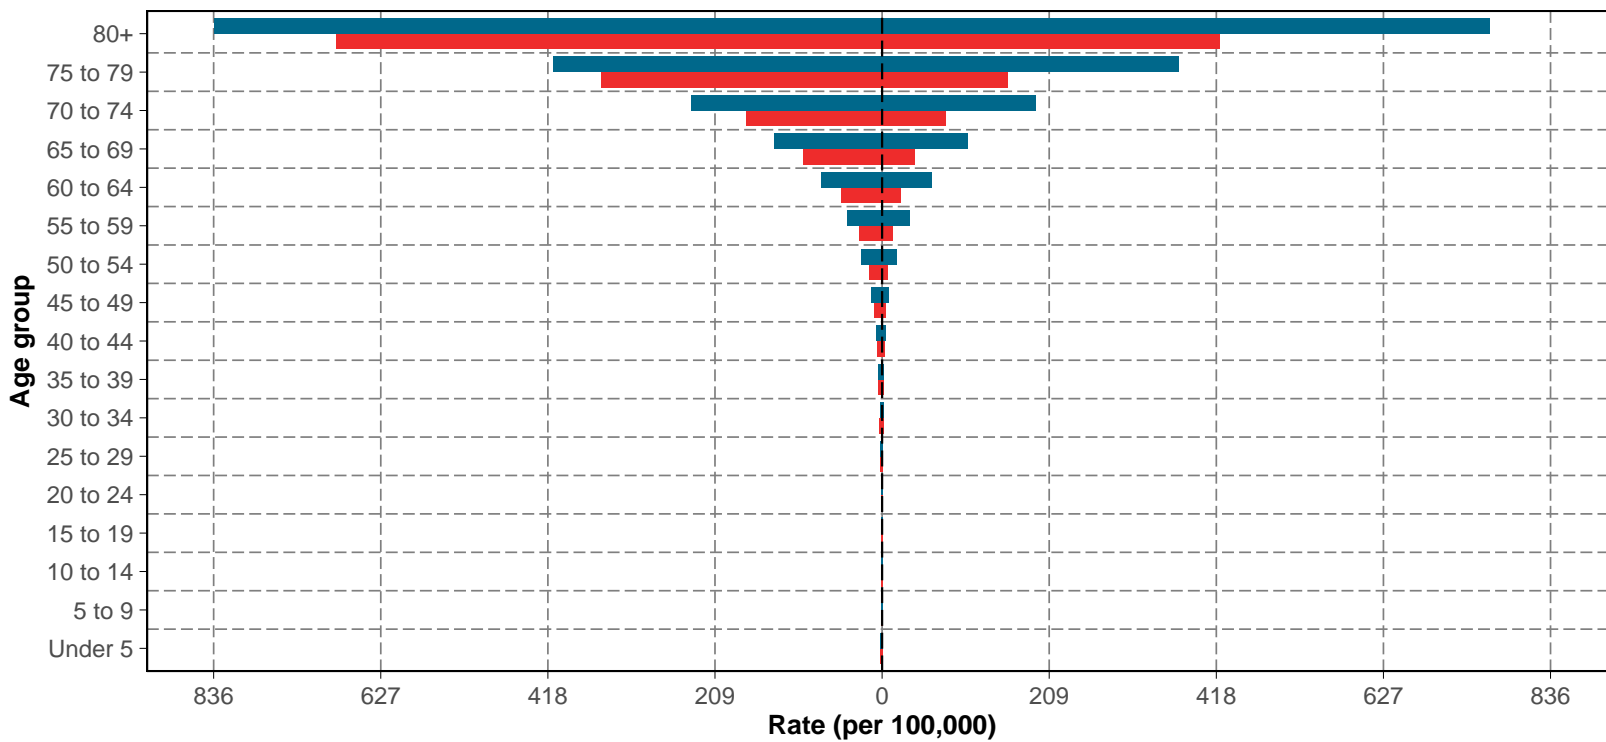

**DALYs**  
1990 2019

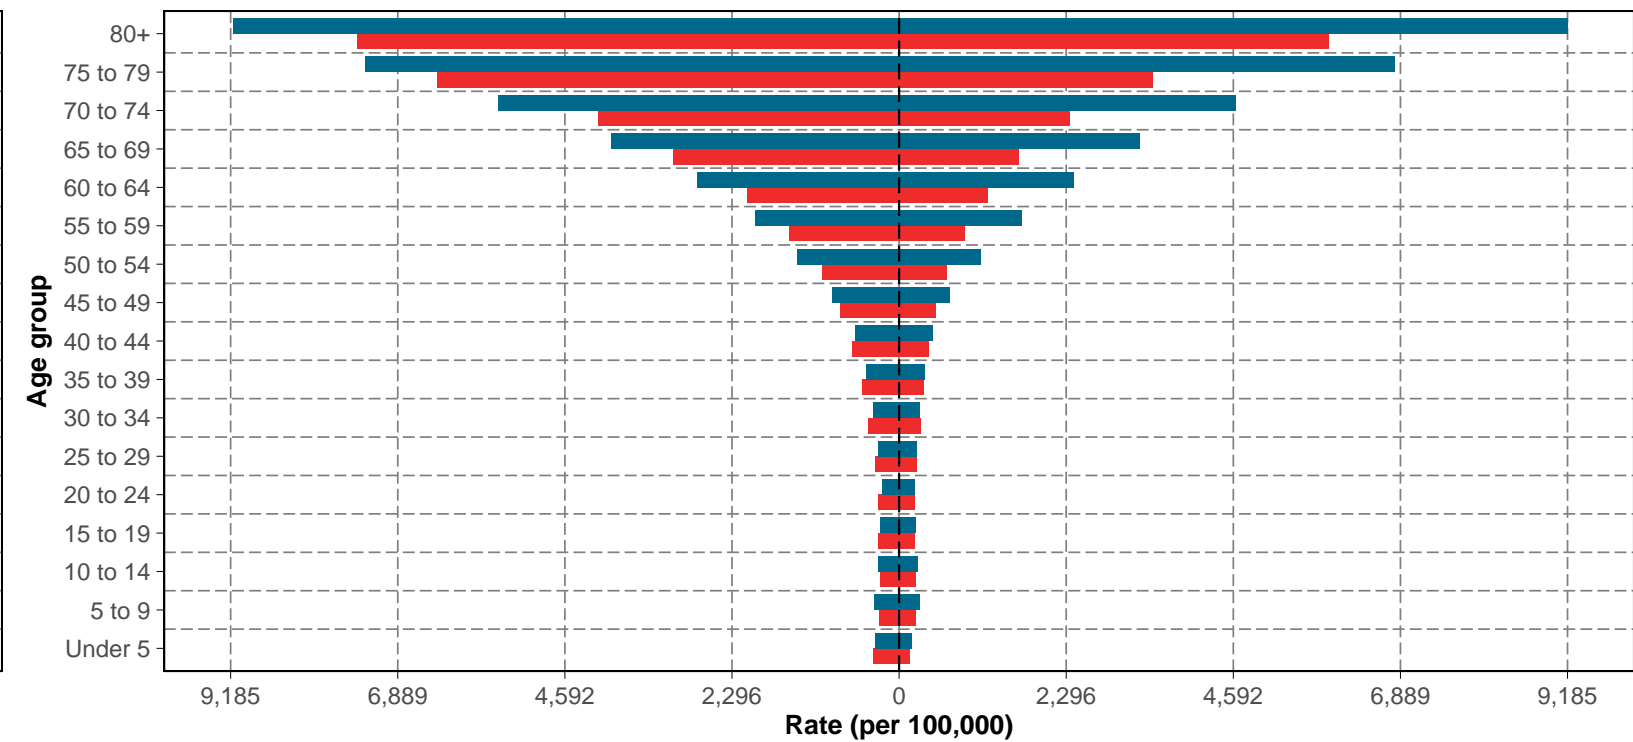

# Qom

## Incidence 1990 2019

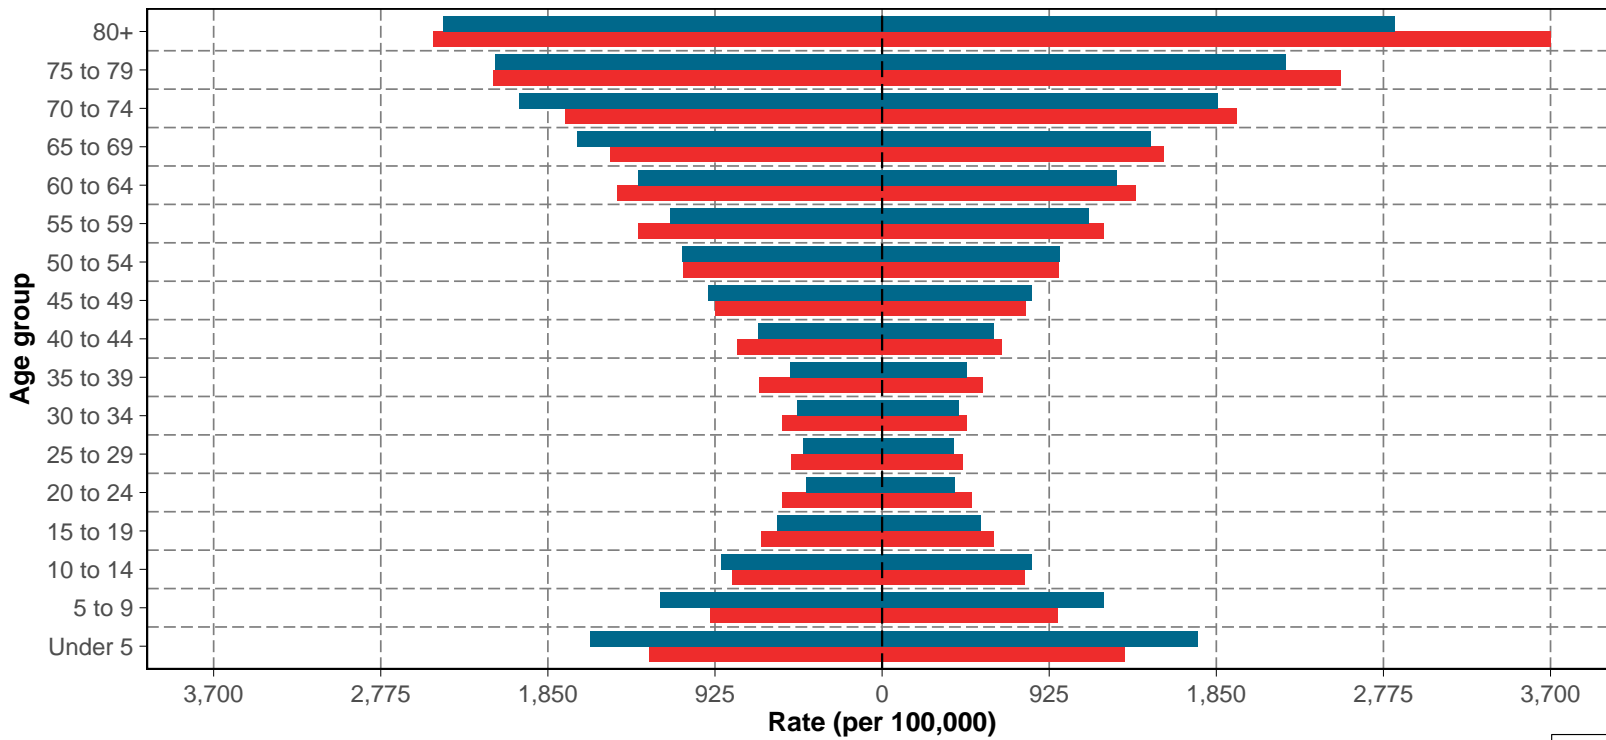

## Prevalence 1990 2019

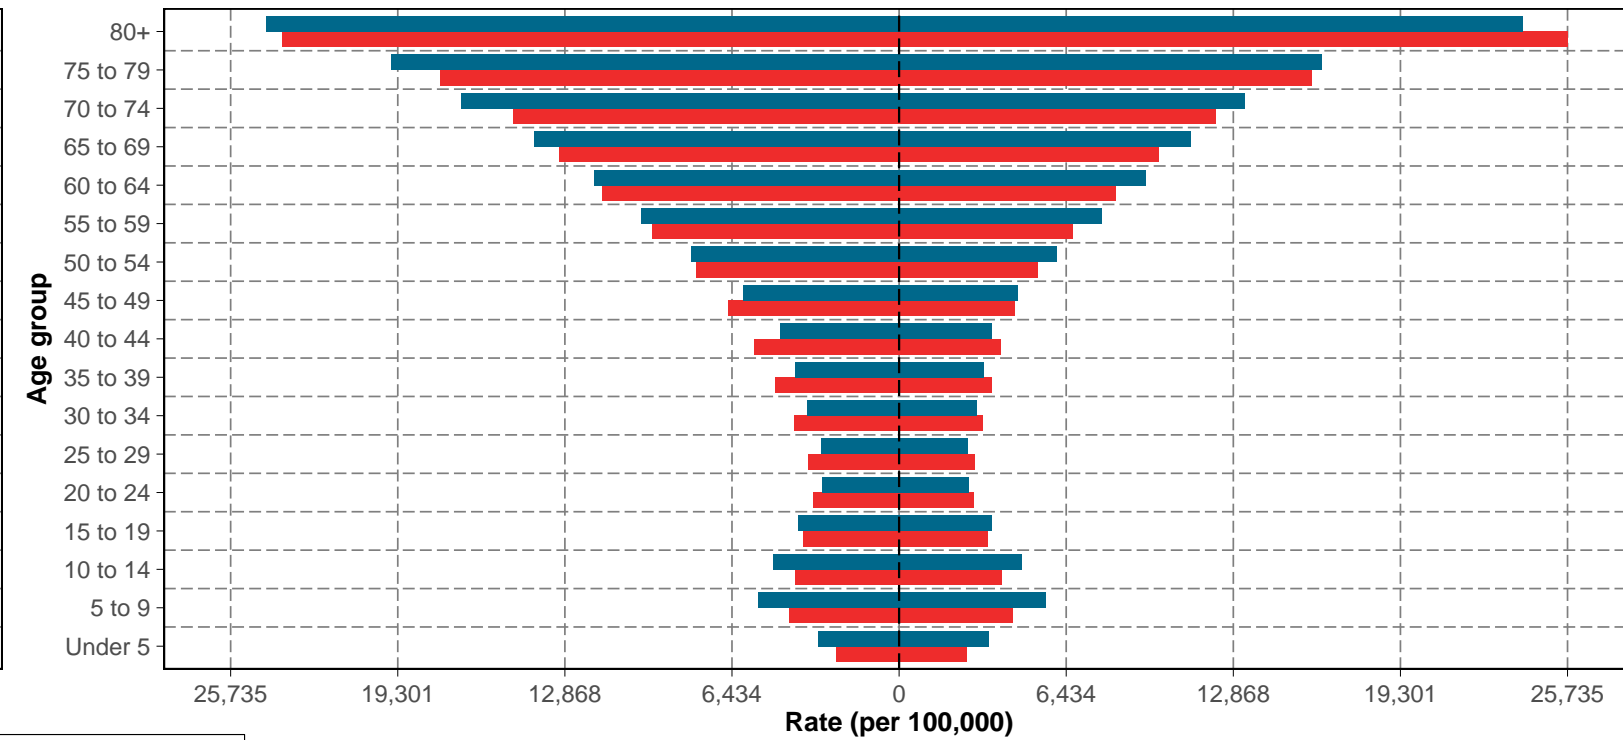

## Deaths 1990 2019

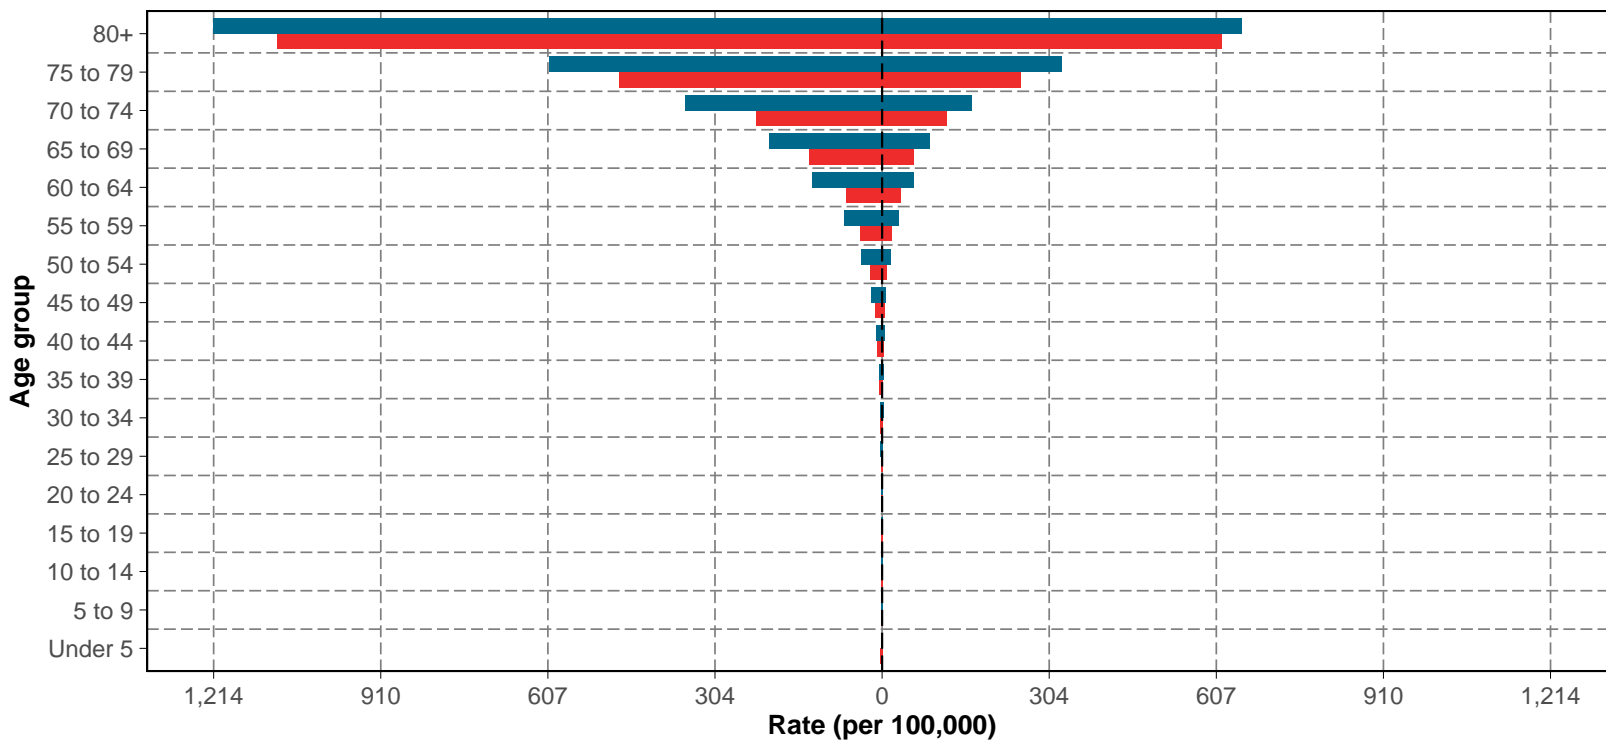

## DALYs 1990 2019

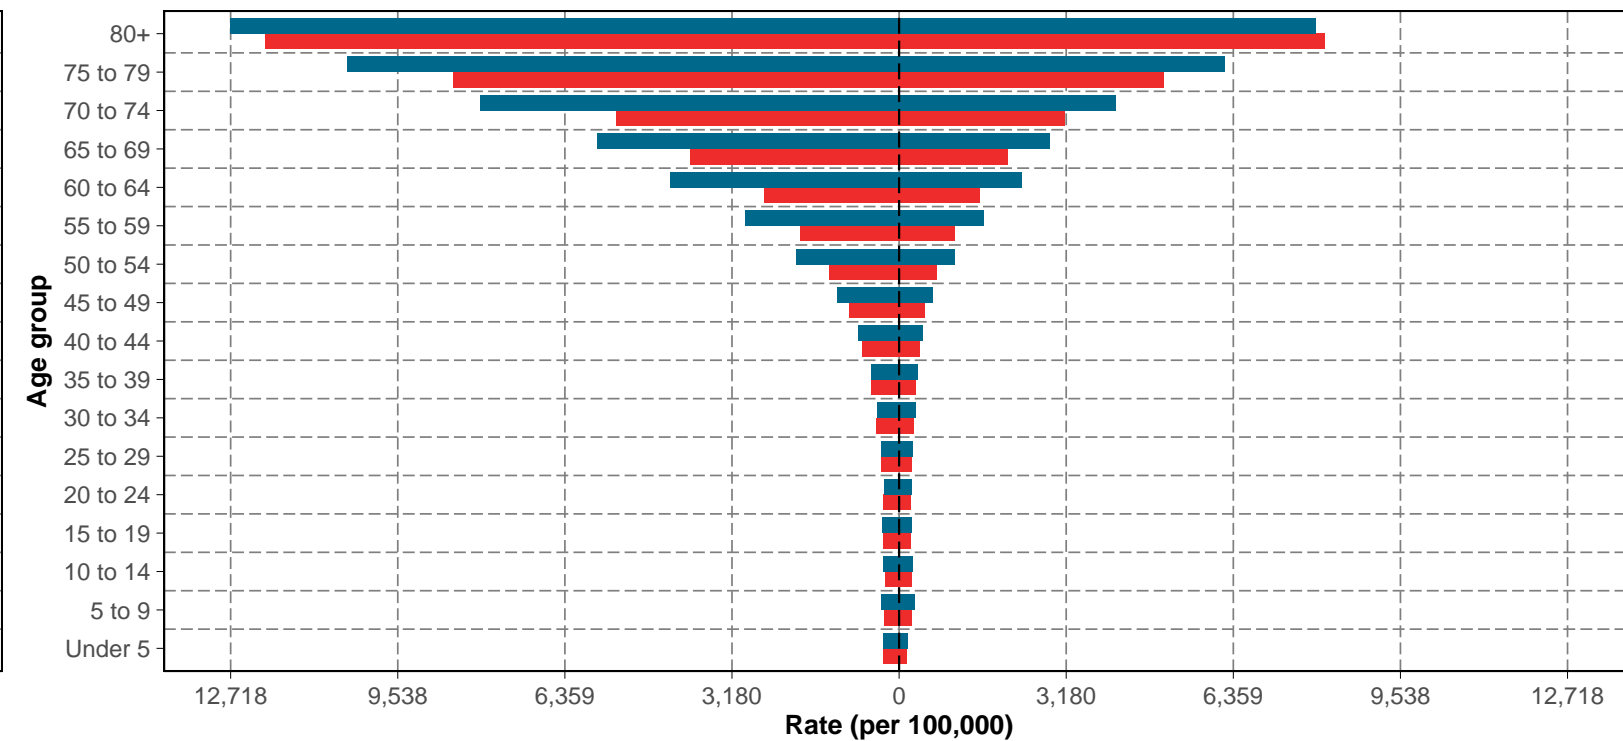

**Sex**  
Female Male



# Semanan

**Incidence**  
1990 2019

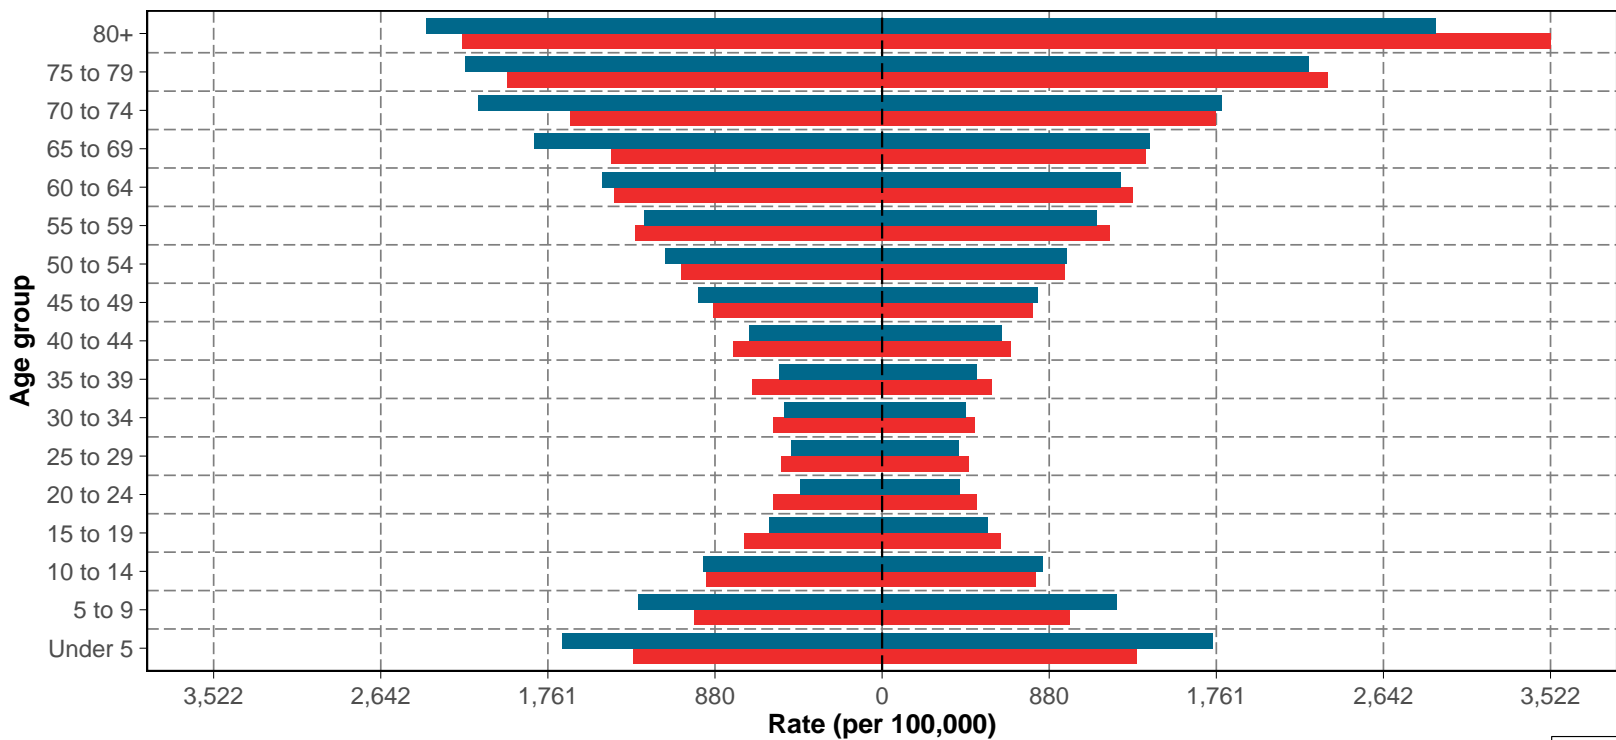

**Prevalence**  
1990 2019

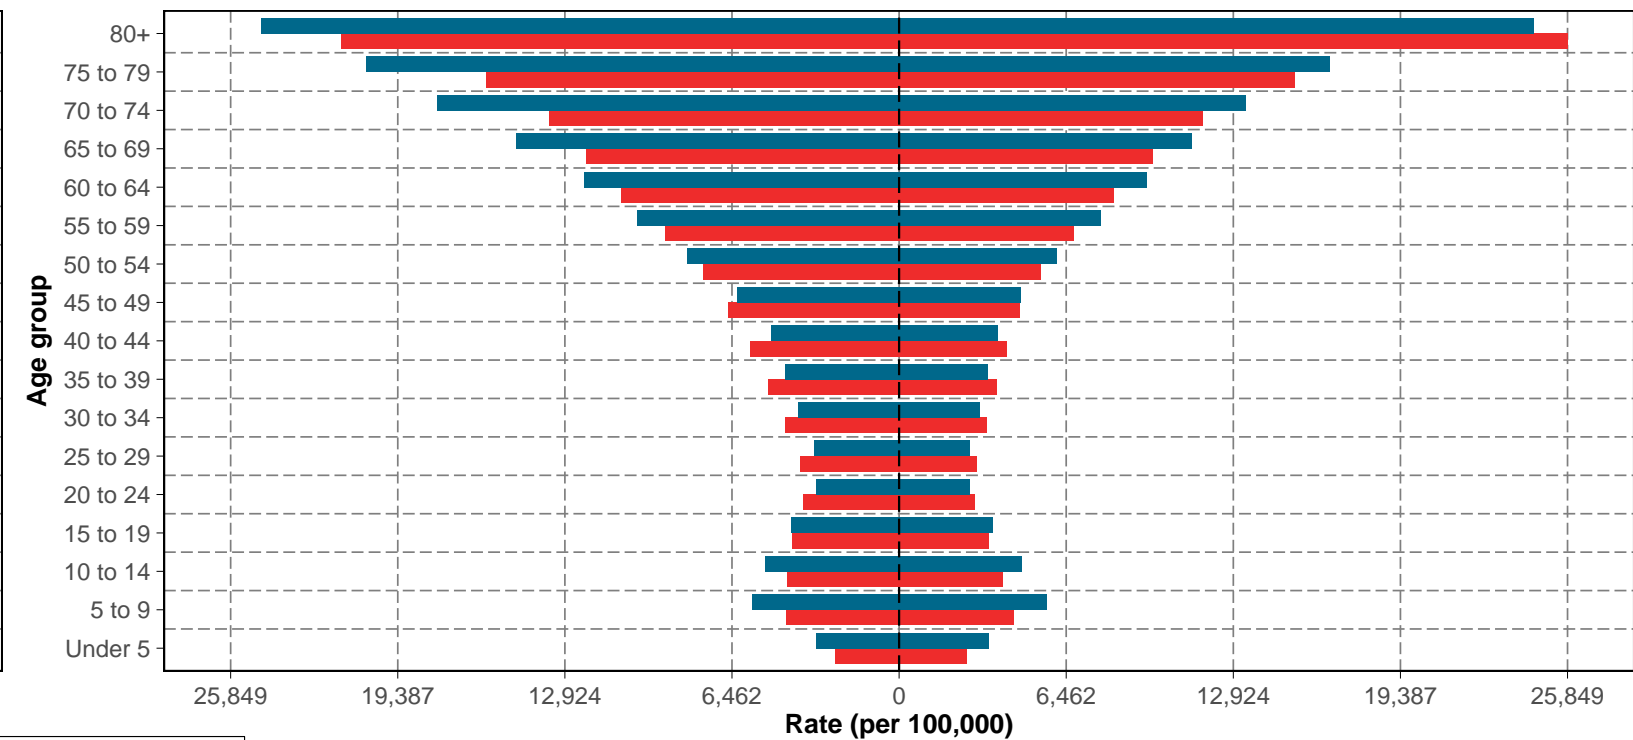

**Deaths**  
1990 2019

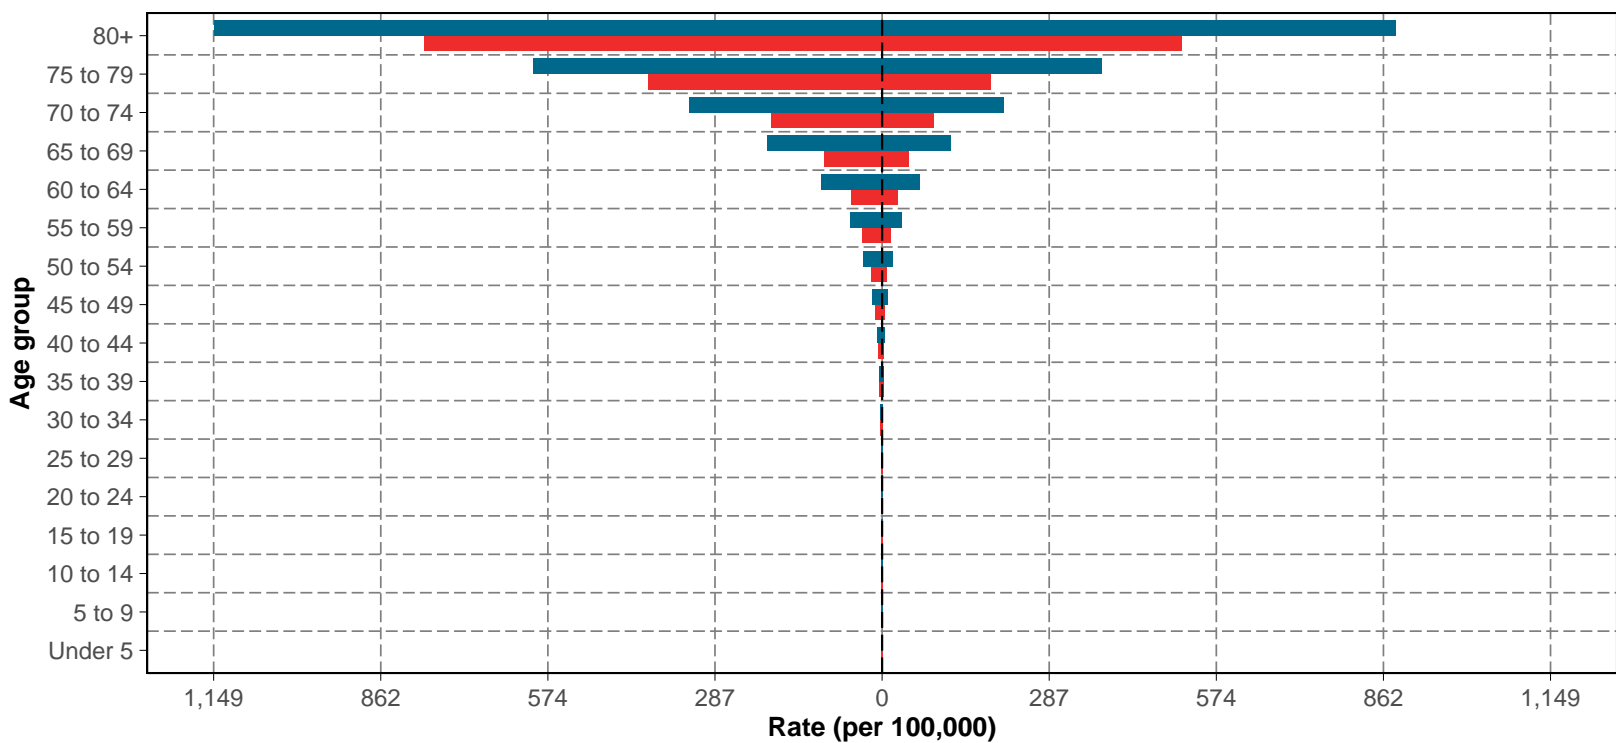

**DALYs**  
1990 2019

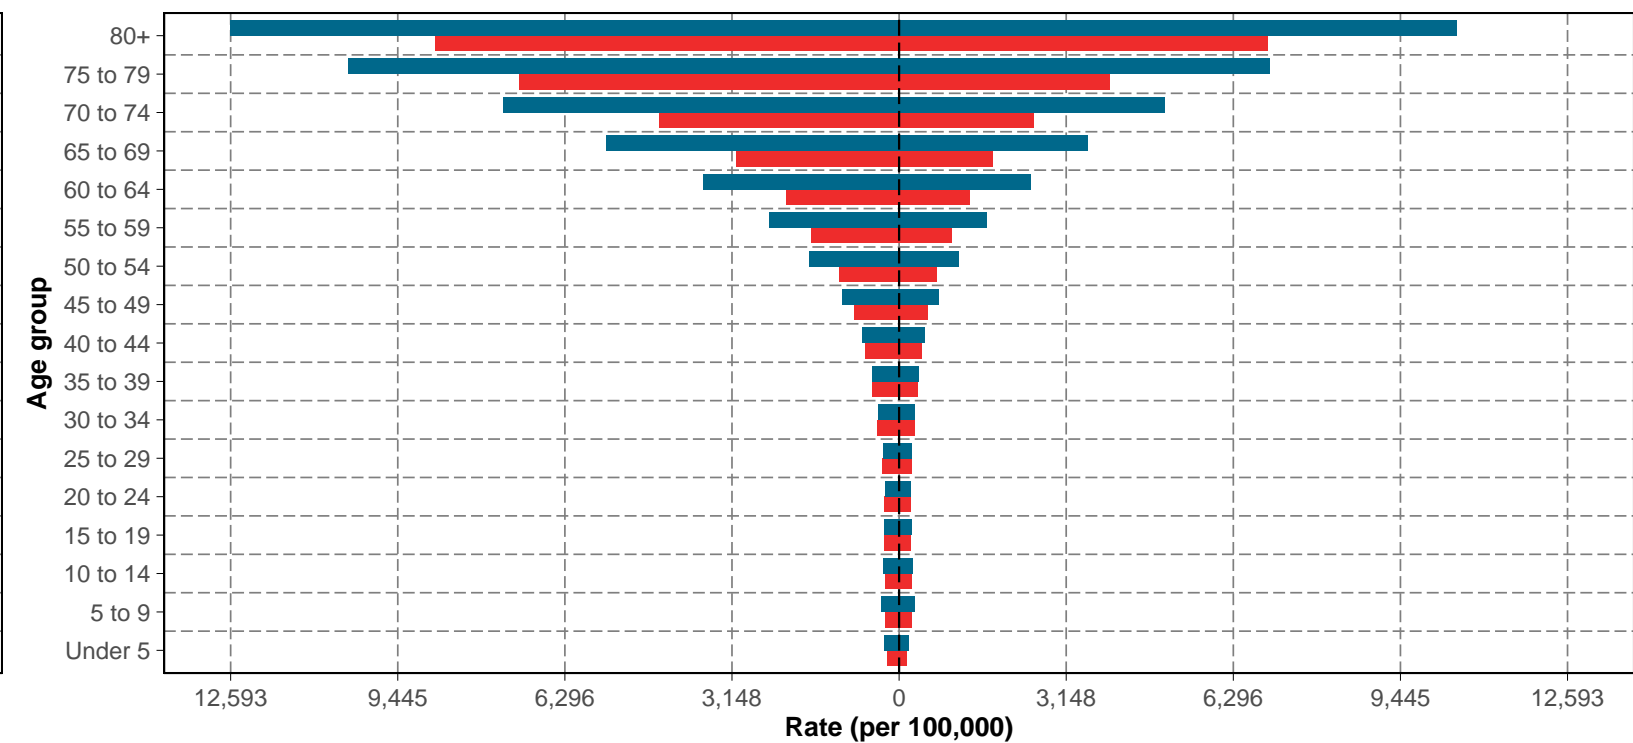

**Sex**  
Female Male

# Sistan and Baluchistan

**Incidence**  
1990 2019

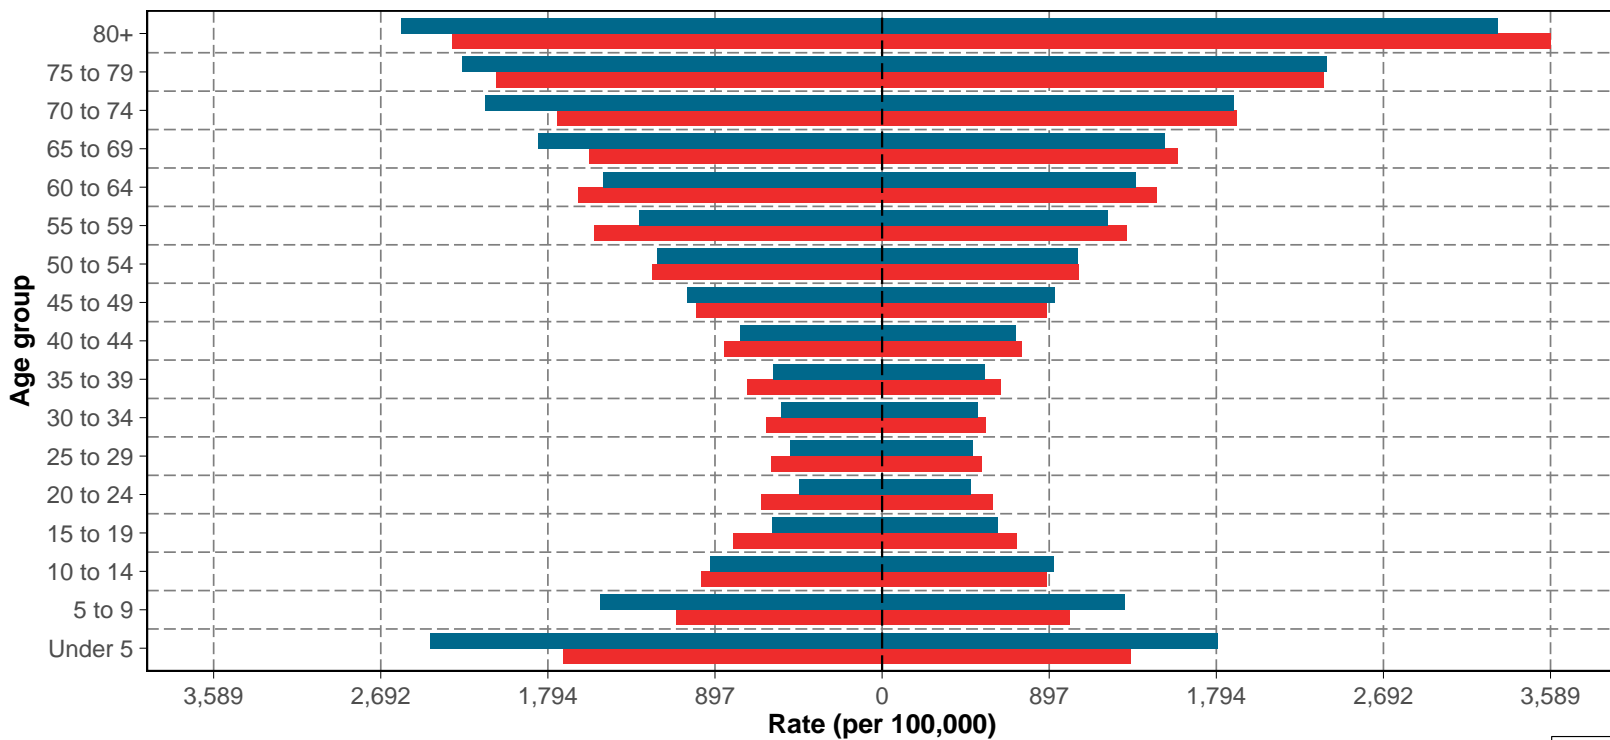

**Prevalence**  
1990 2019

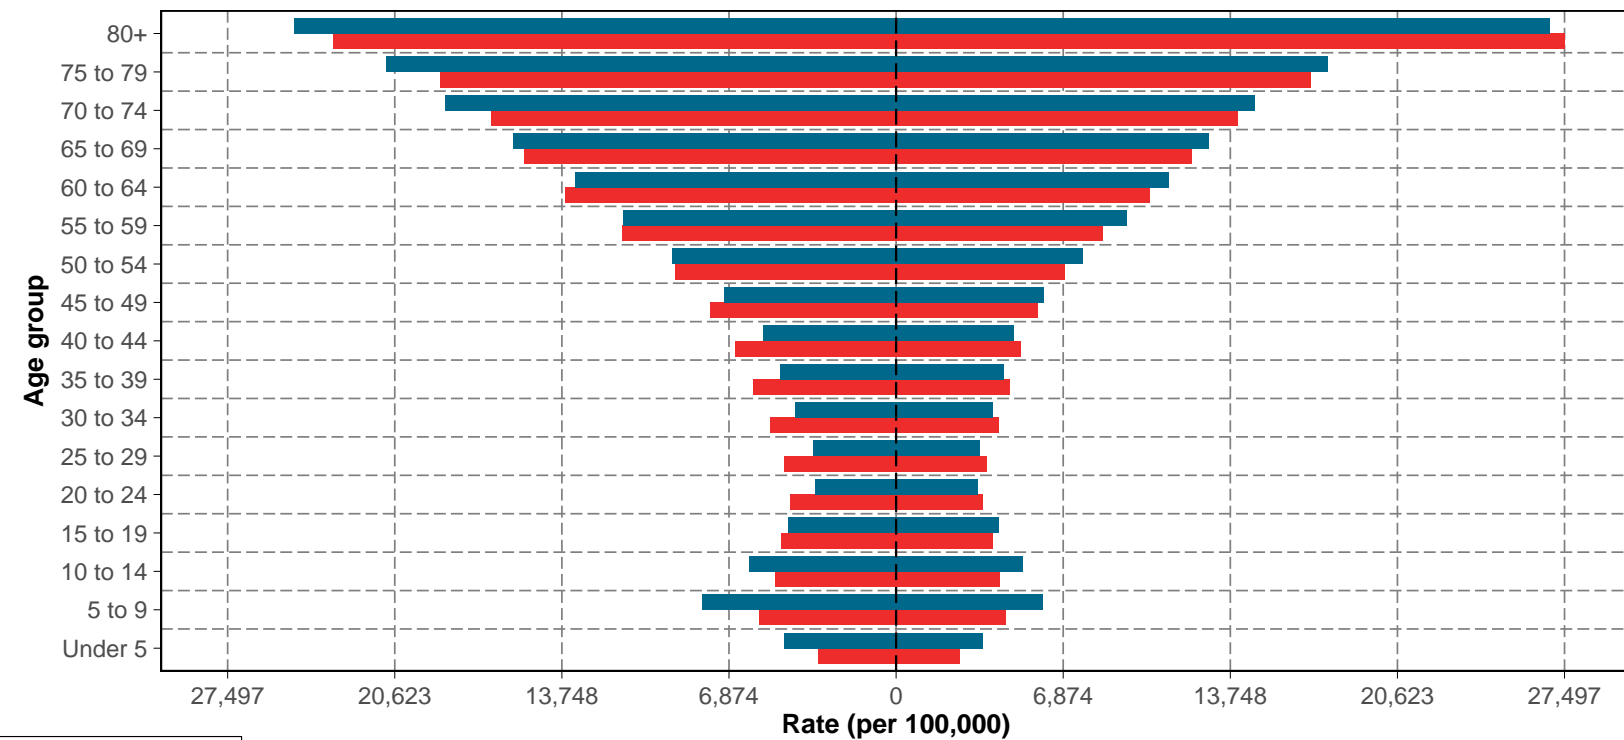

**Deaths**  
1990 2019

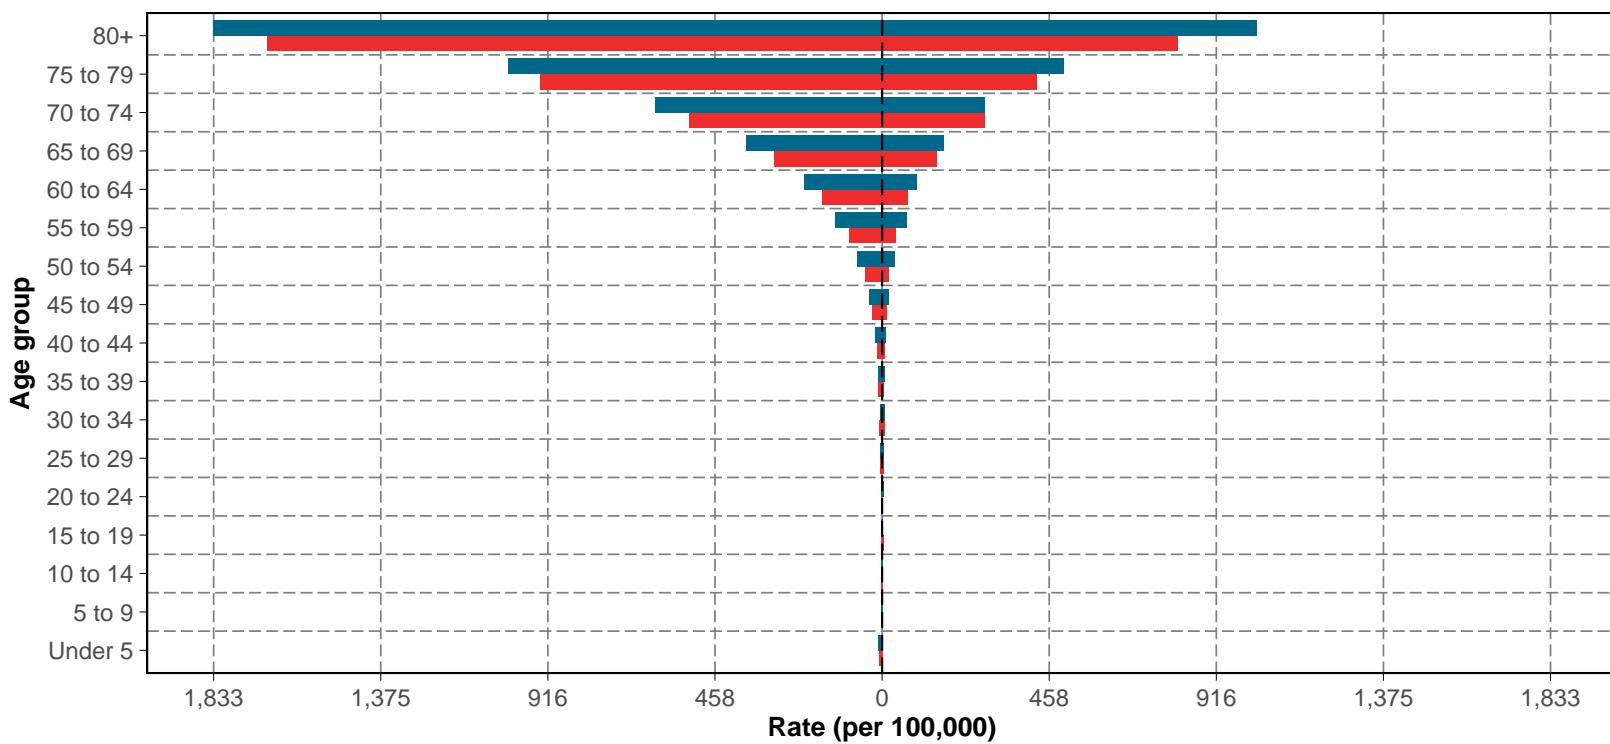

**DALYs**  
1990 2019

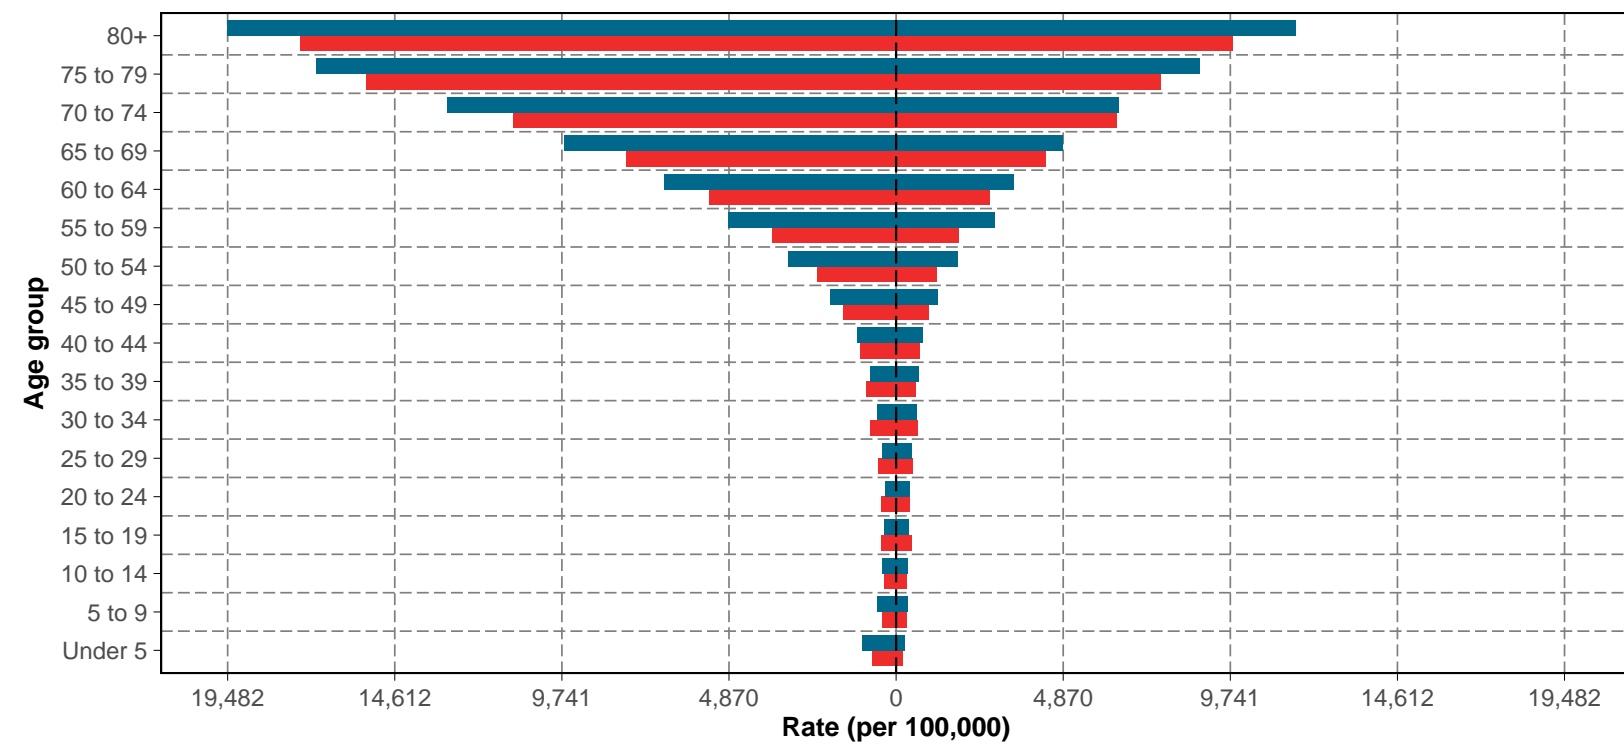

**Sex**  
Female Male

# South Khorasan

**Incidence**  
1990 2019

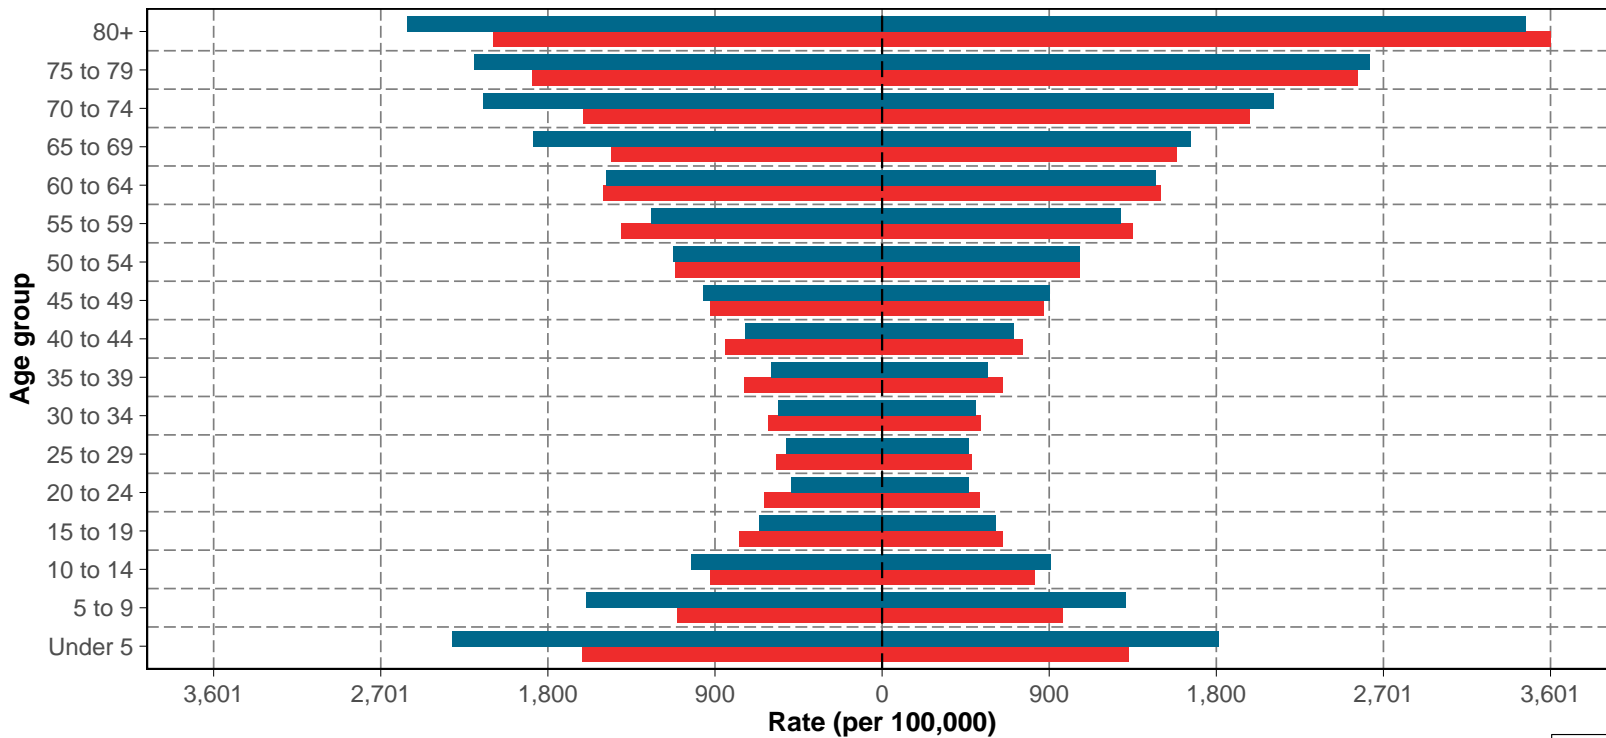

**Prevalence**  
1990 2019

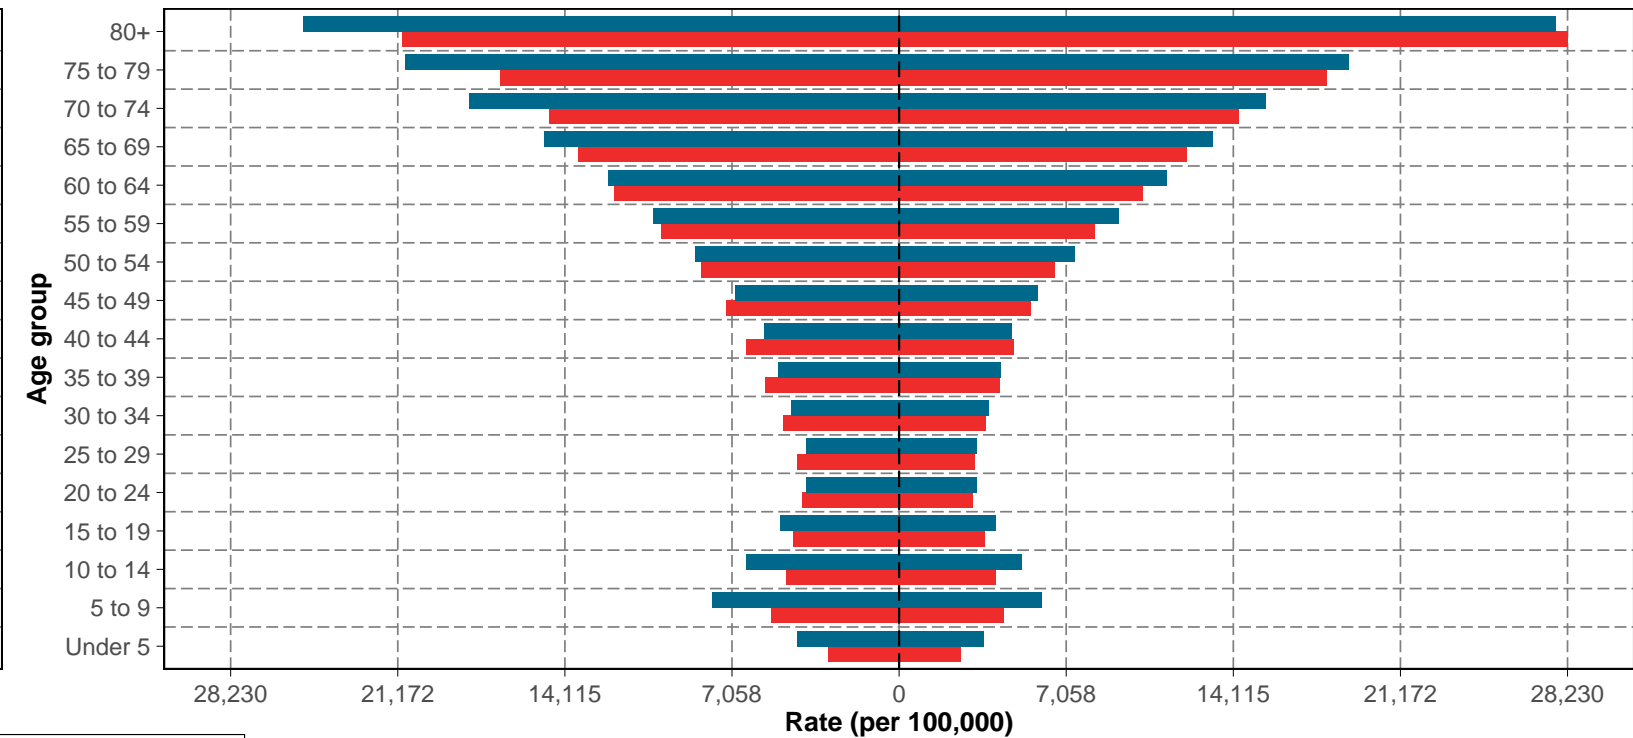

**Sex**  
Female Male

**Deaths**  
1990 2019

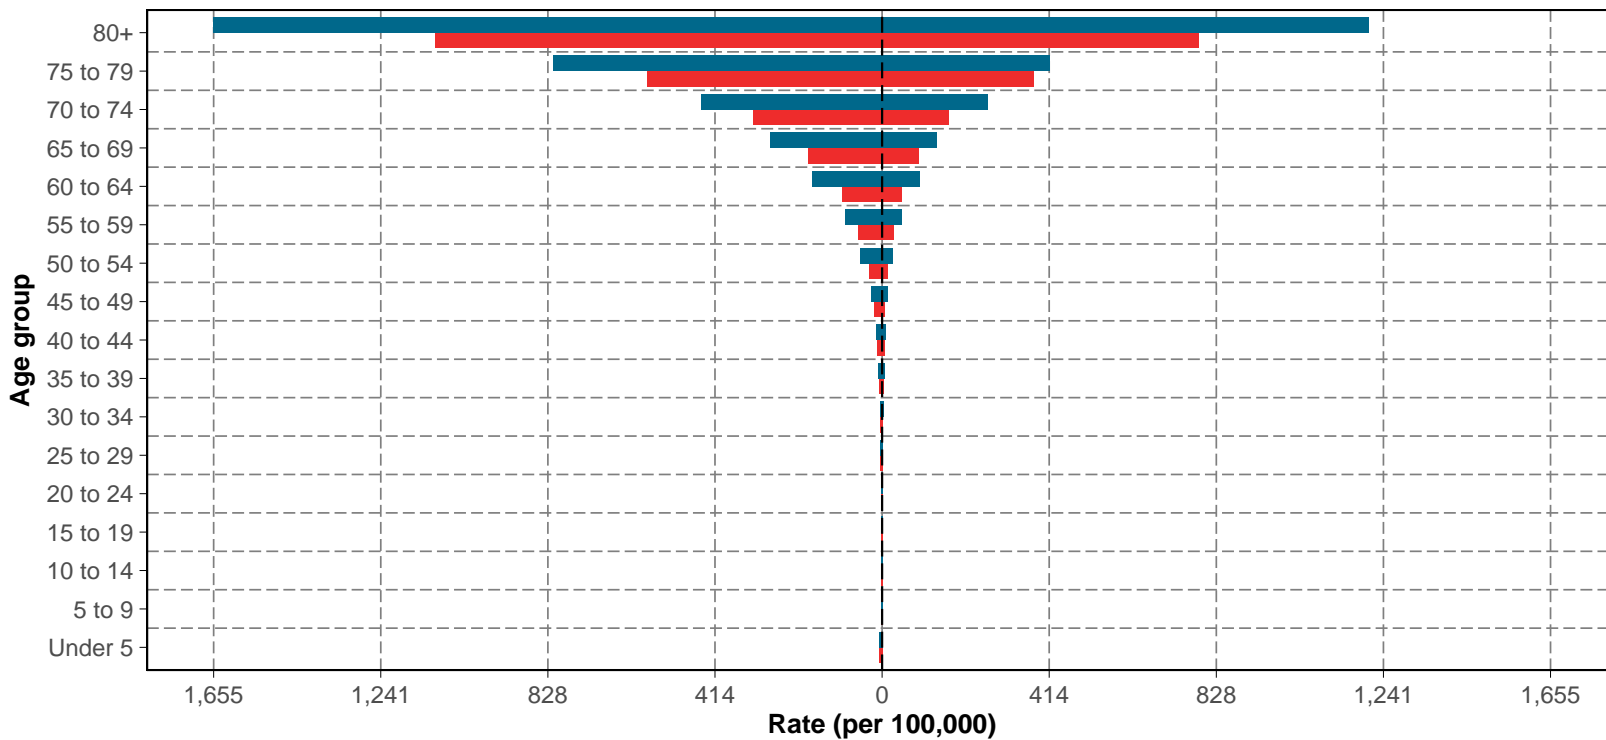

**DALYs**  
1990 2019

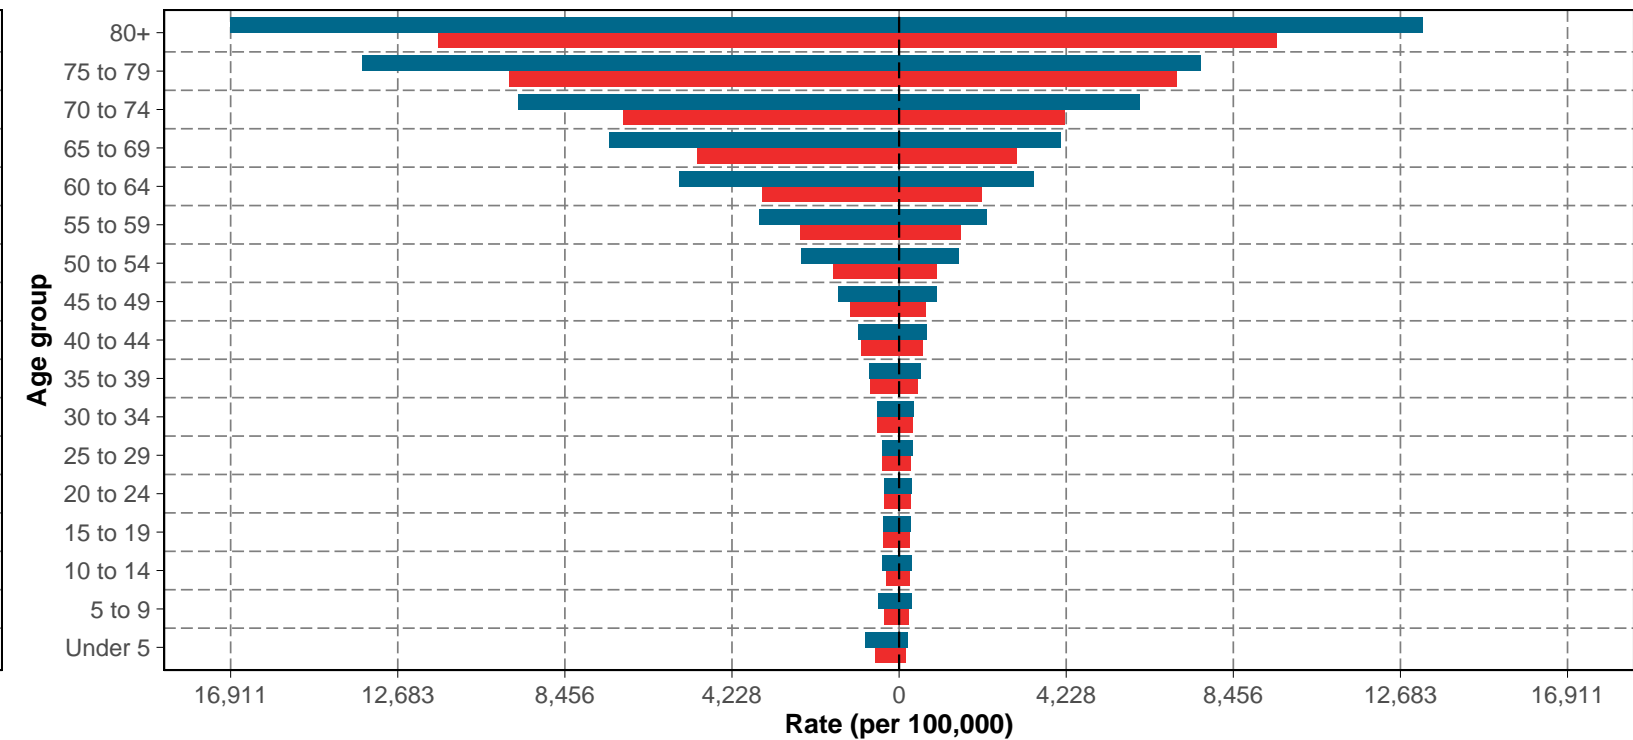

# Tehran

**Incidence**  
1990 2019

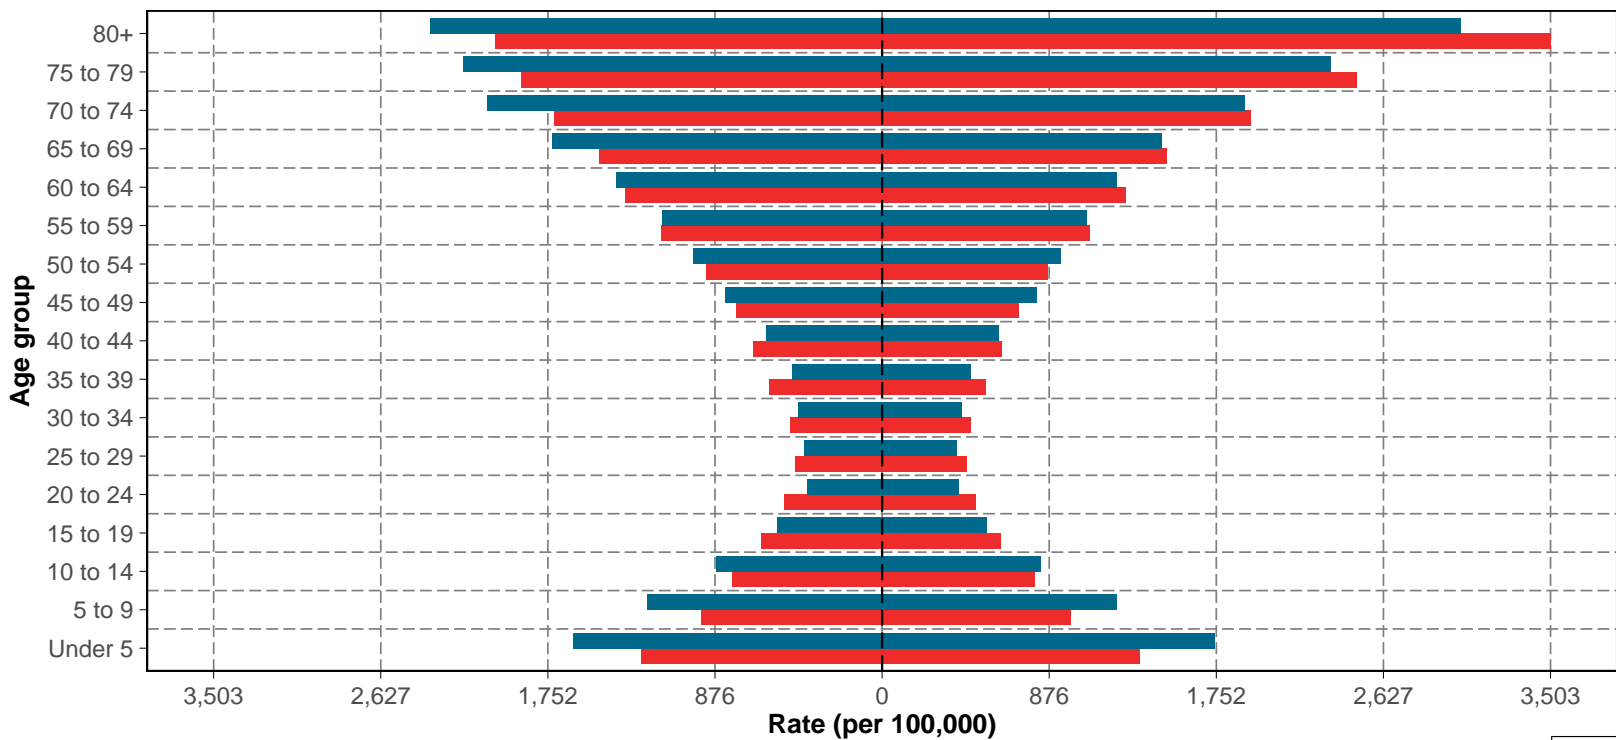

**Prevalence**  
1990 2019

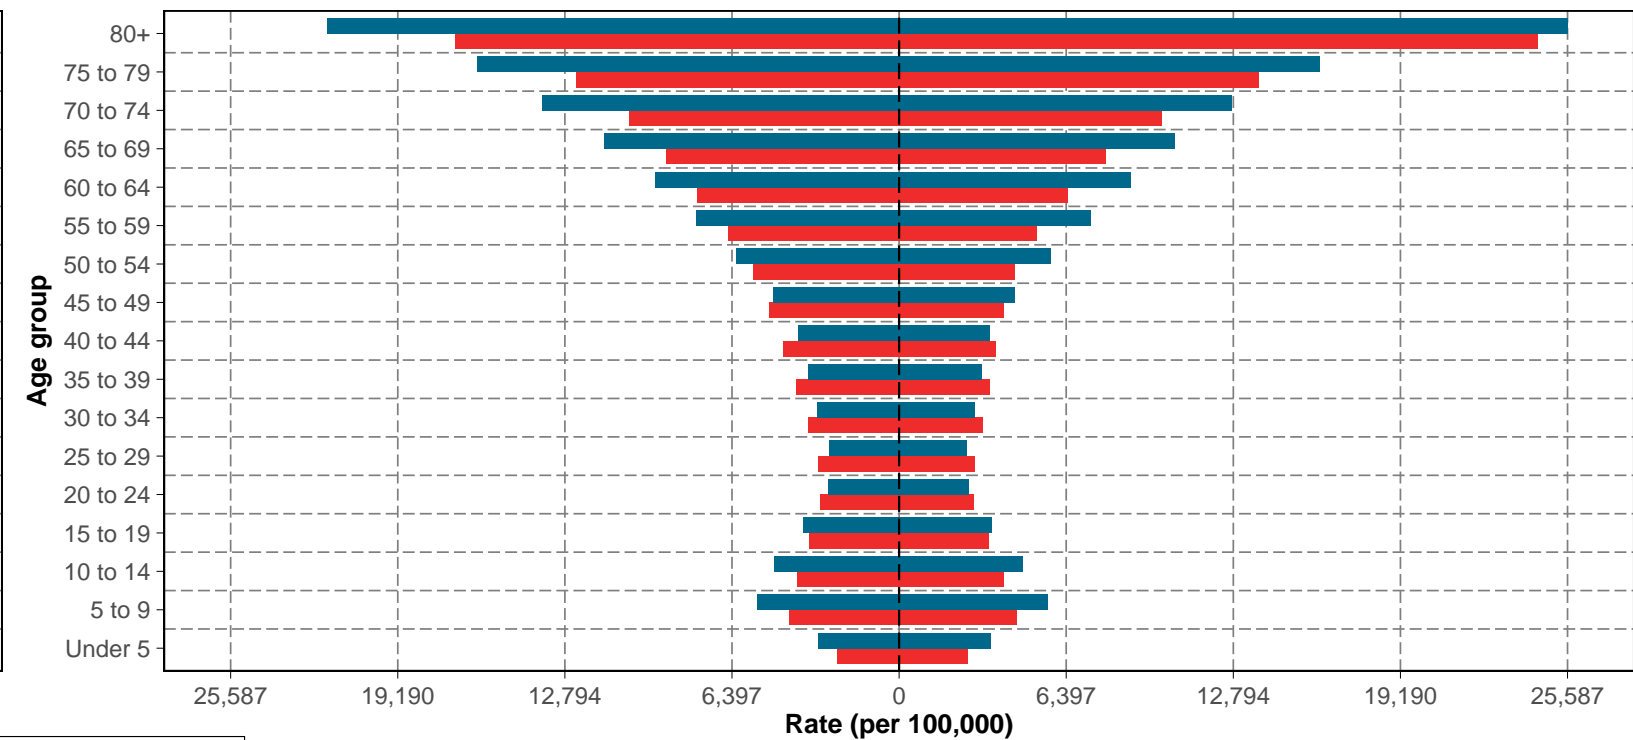

**Deaths**  
1990 2019

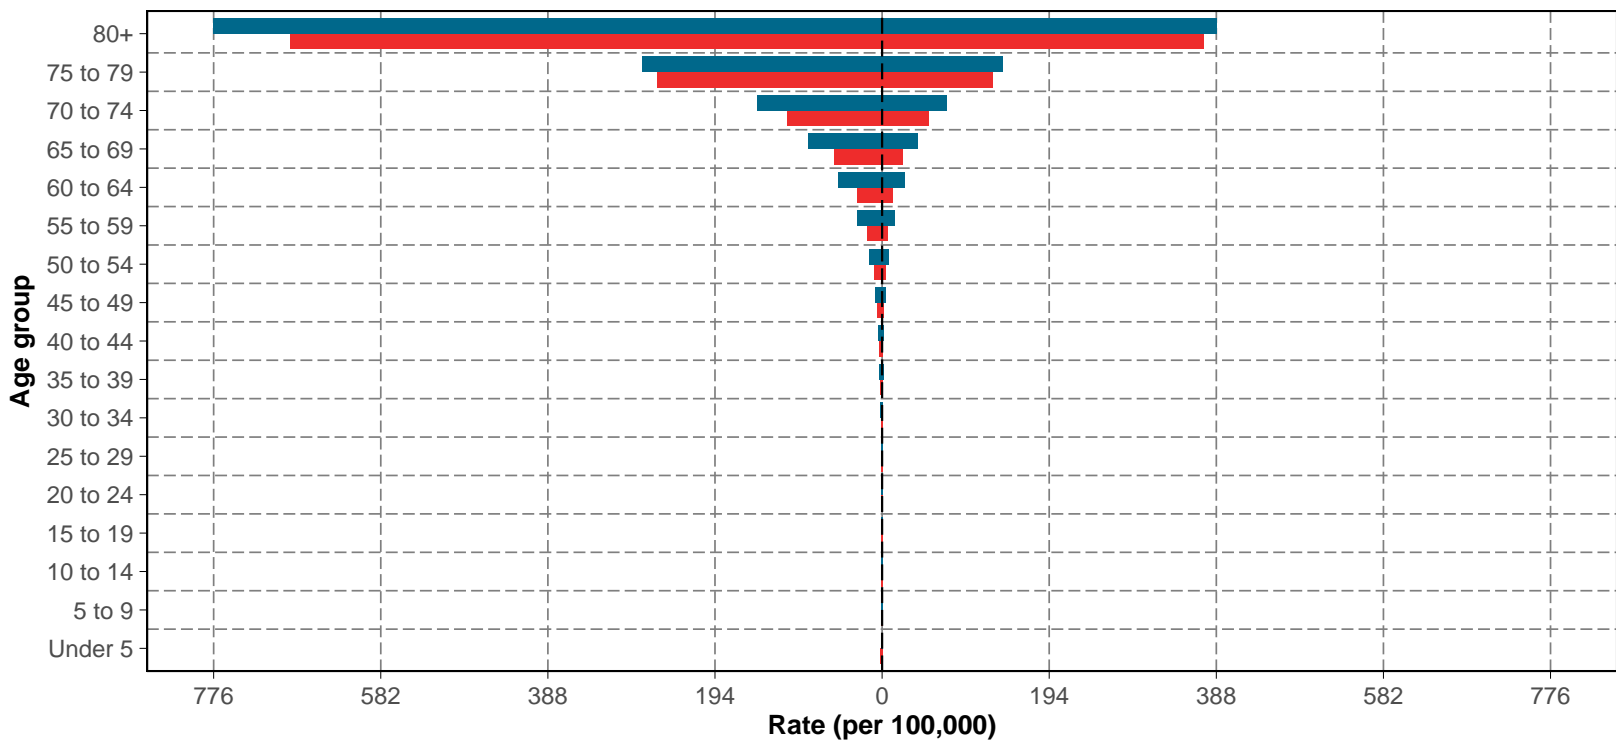

**DALYs**  
1990 2019

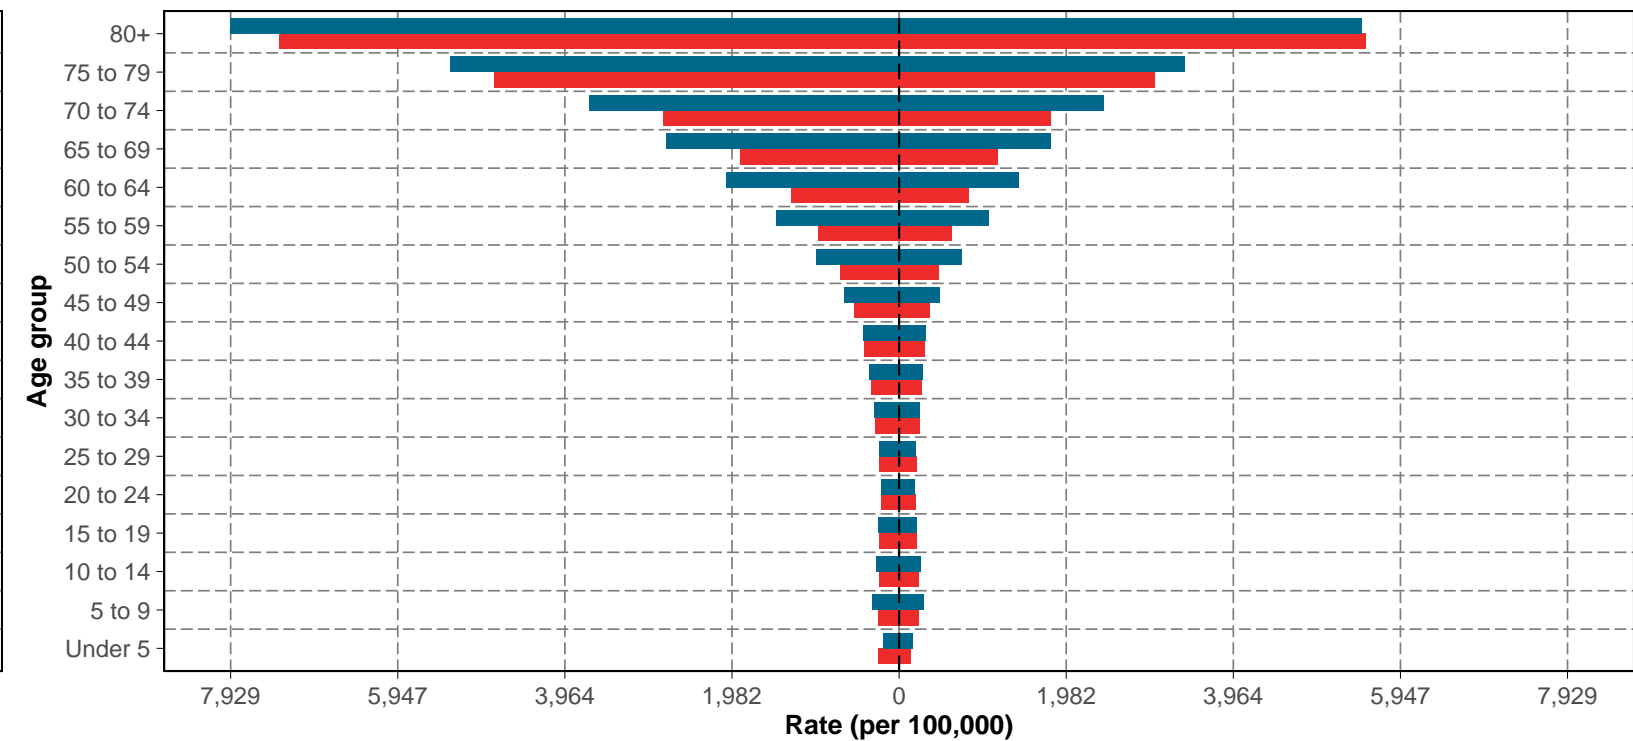

**Sex**  
Female Male

# West Azarbayejan

**Incidence**  
1990 2019

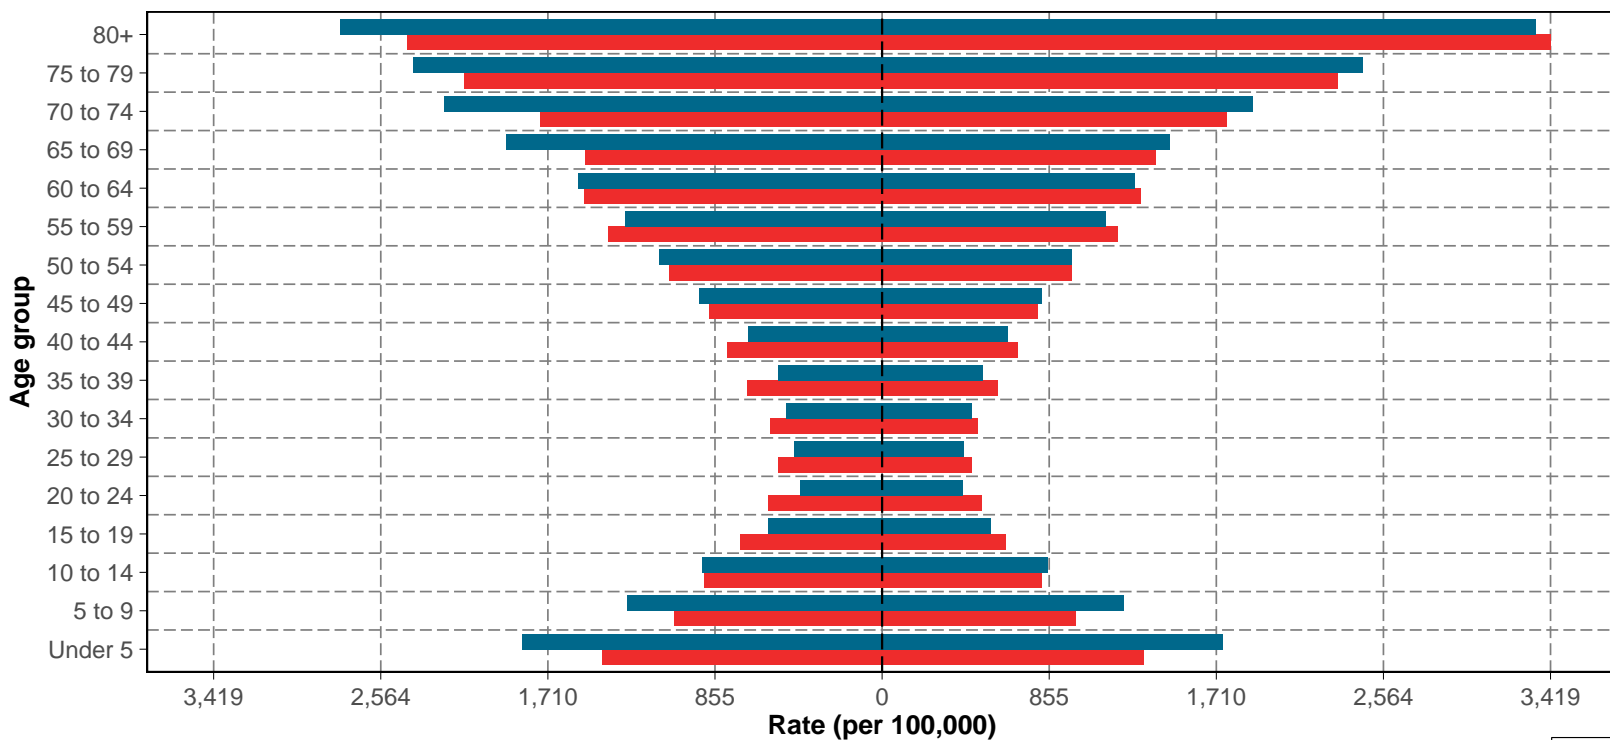

**Prevalence**  
1990 2019

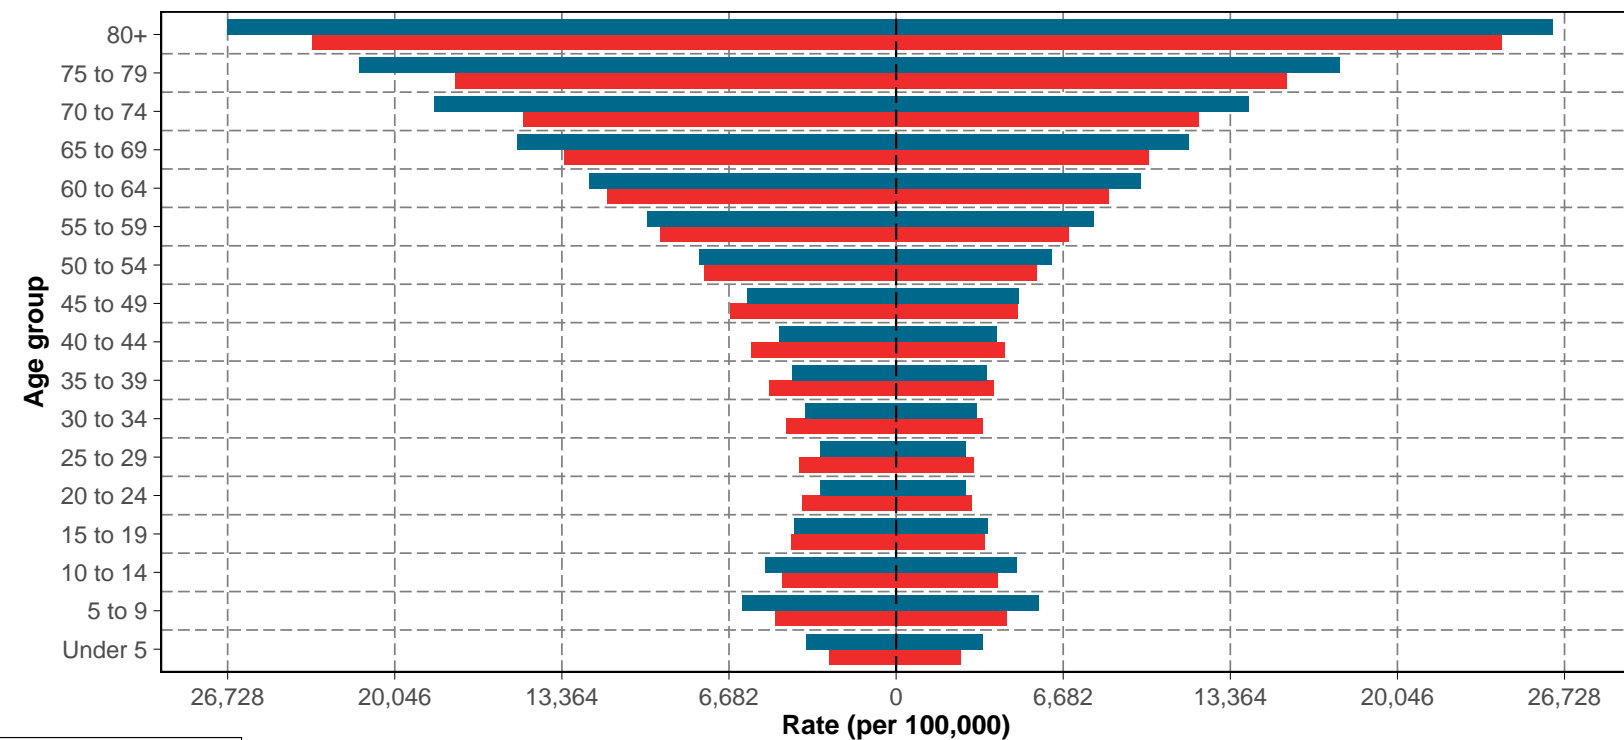

**Deaths**  
1990 2019

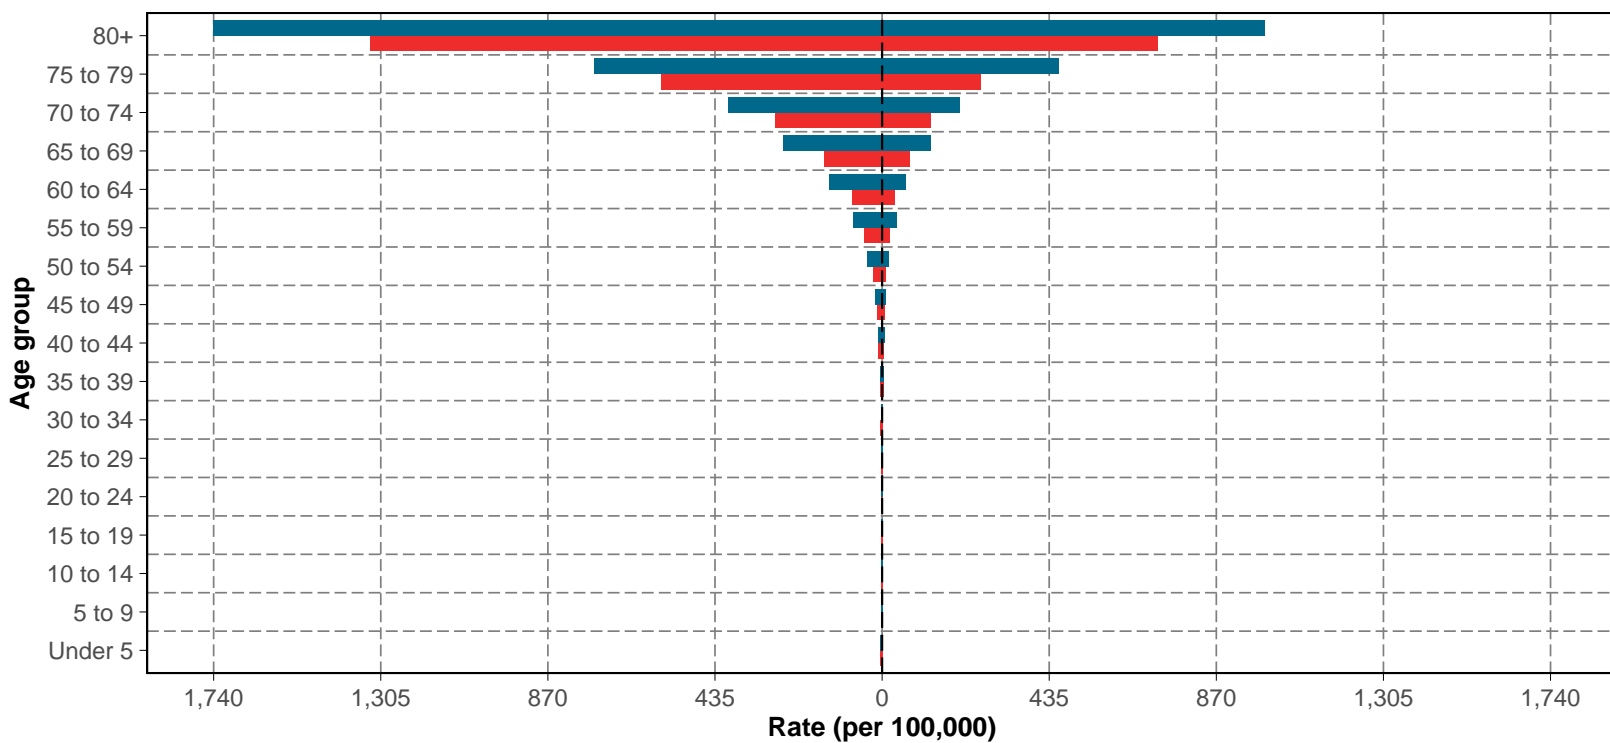

**DALYs**  
1990 2019

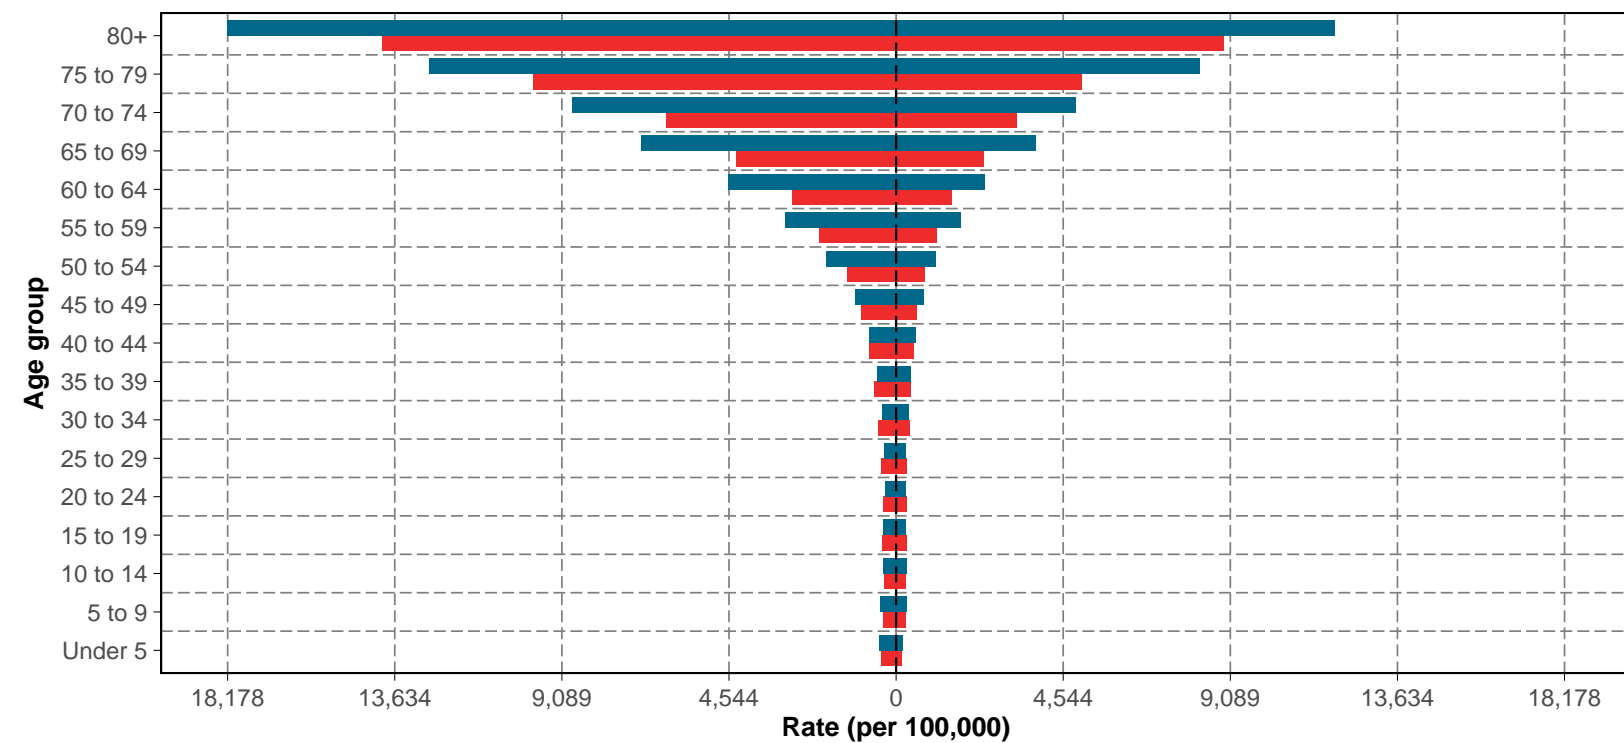

**Sex**  
Female Male

# Yazd

**Incidence**  
1990 2019

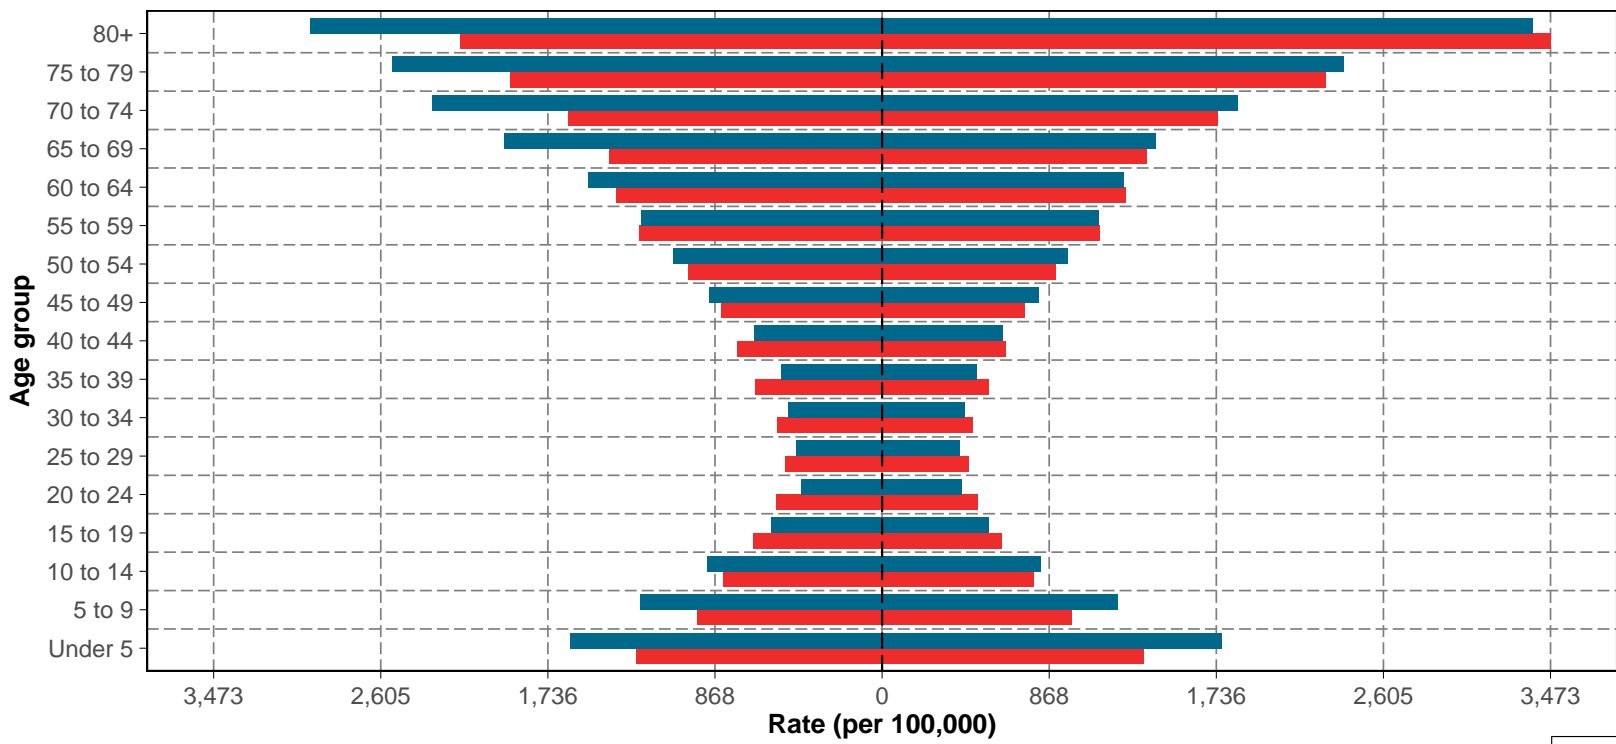

**Prevalence**  
1990 2019

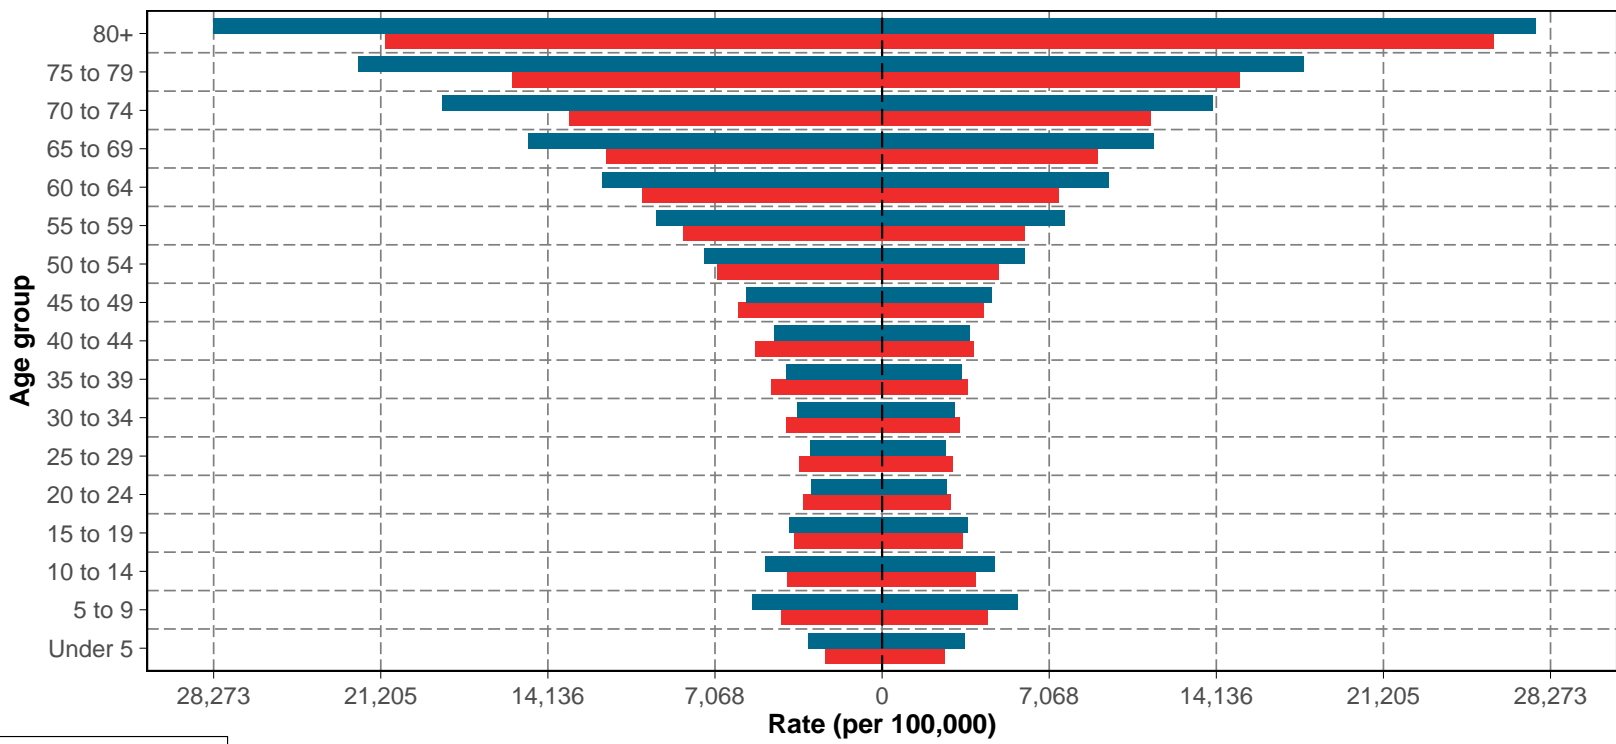

**Sex**  
Female Male

**Deaths**  
1990 2019

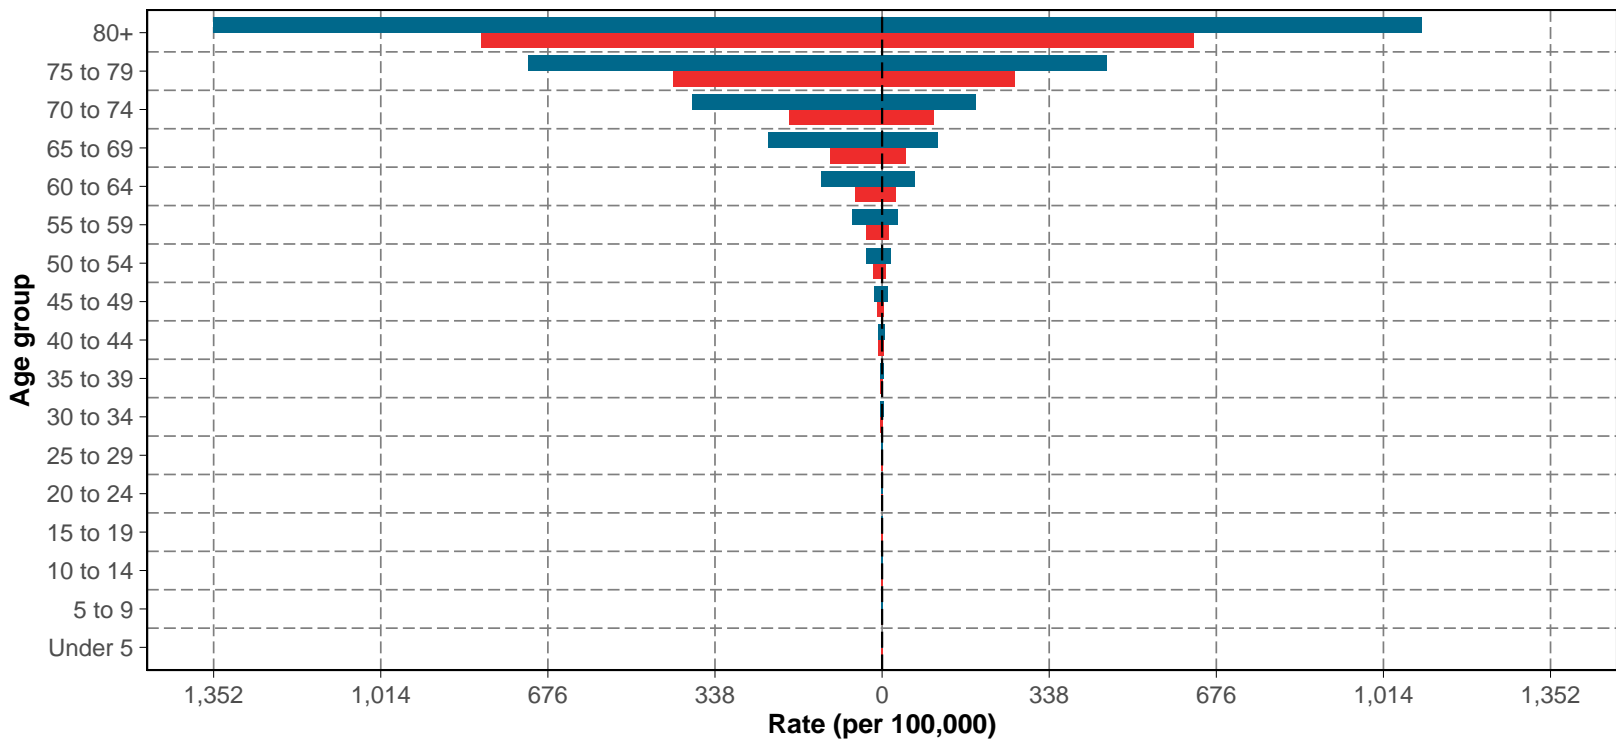

**DALYs**  
1990 2019

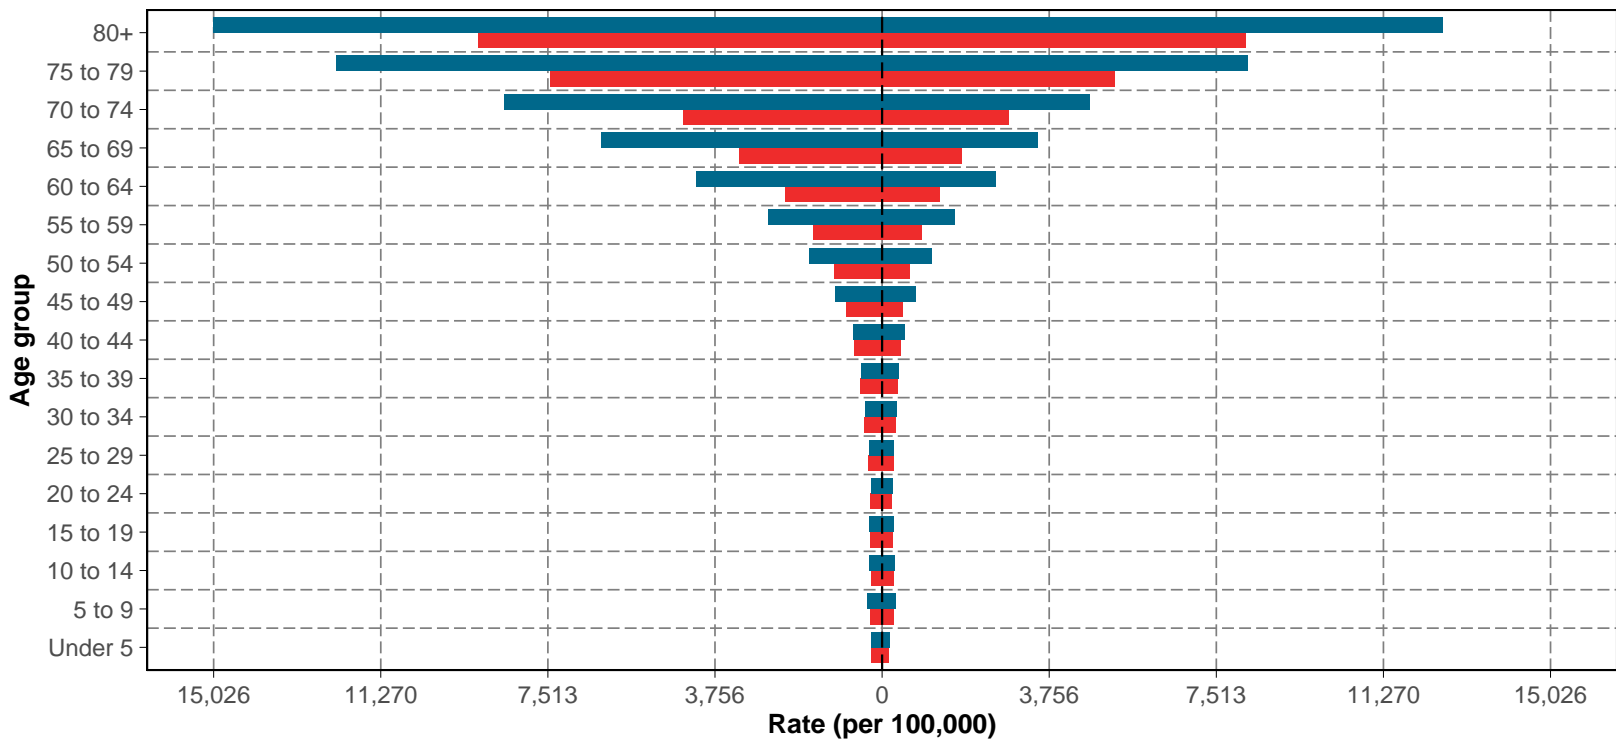

# Zanjan

## Incidence 1990 2019

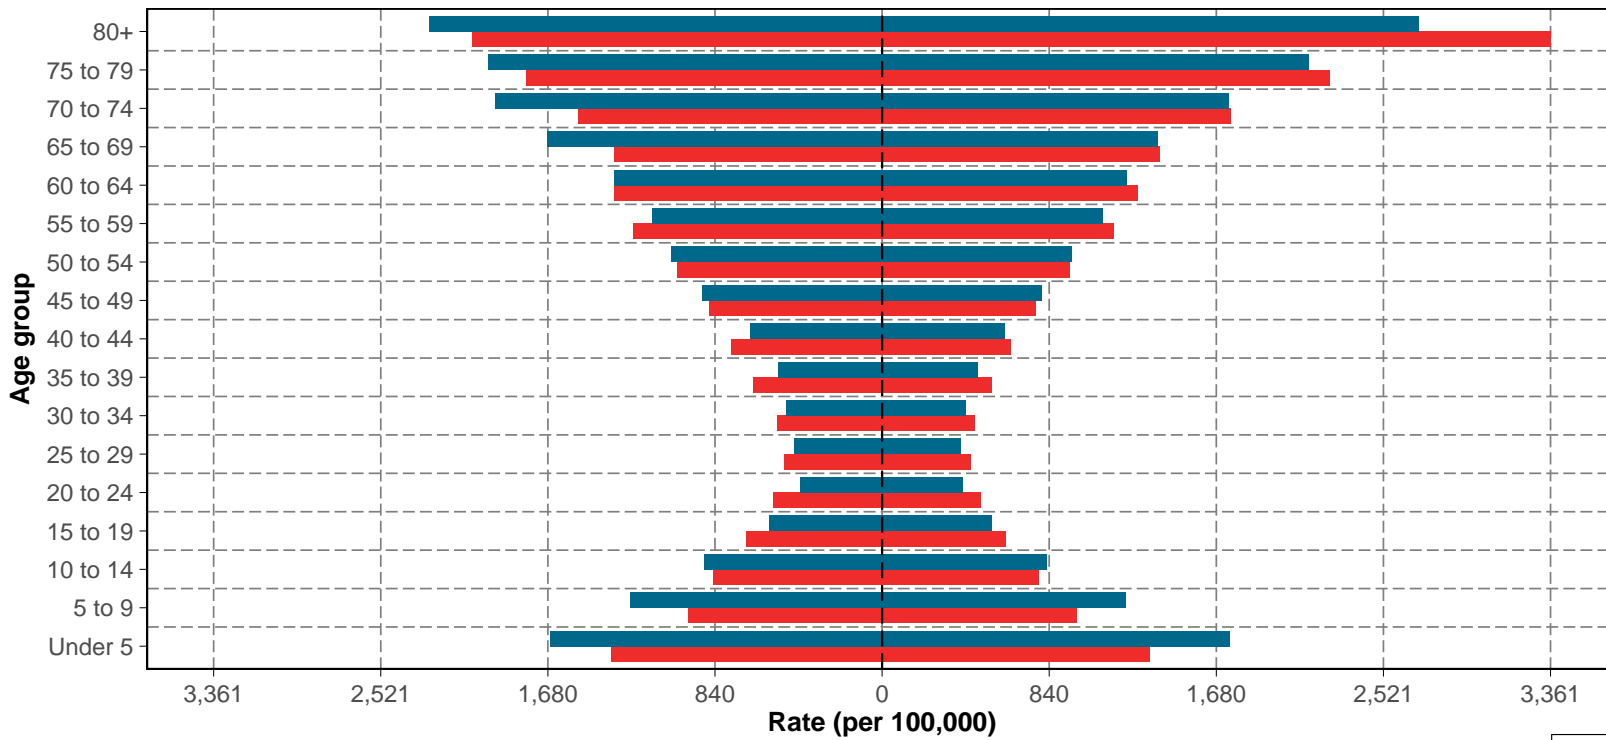

## Prevalence 1990 2019

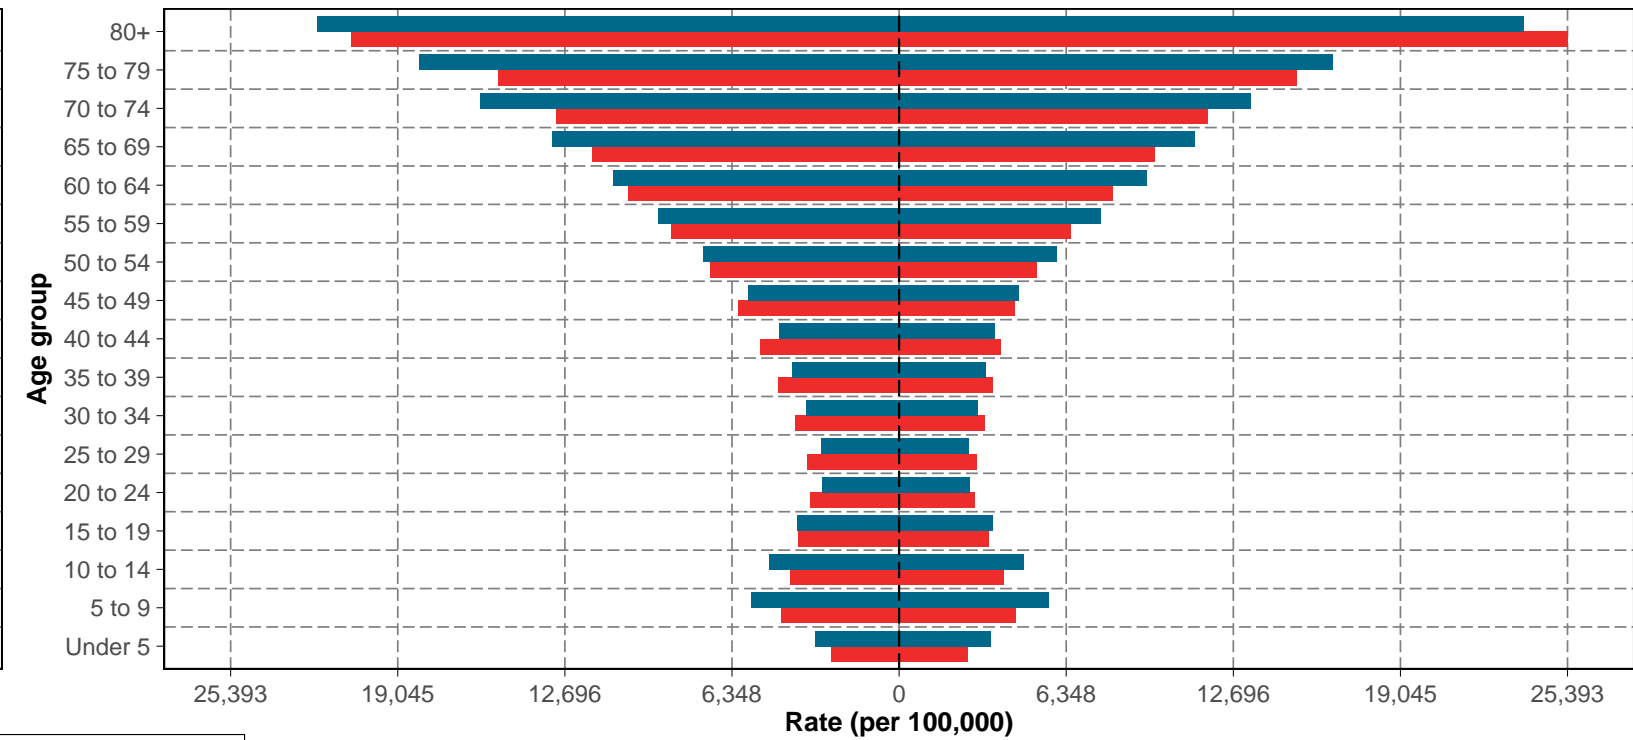

## Deaths 1990 2019

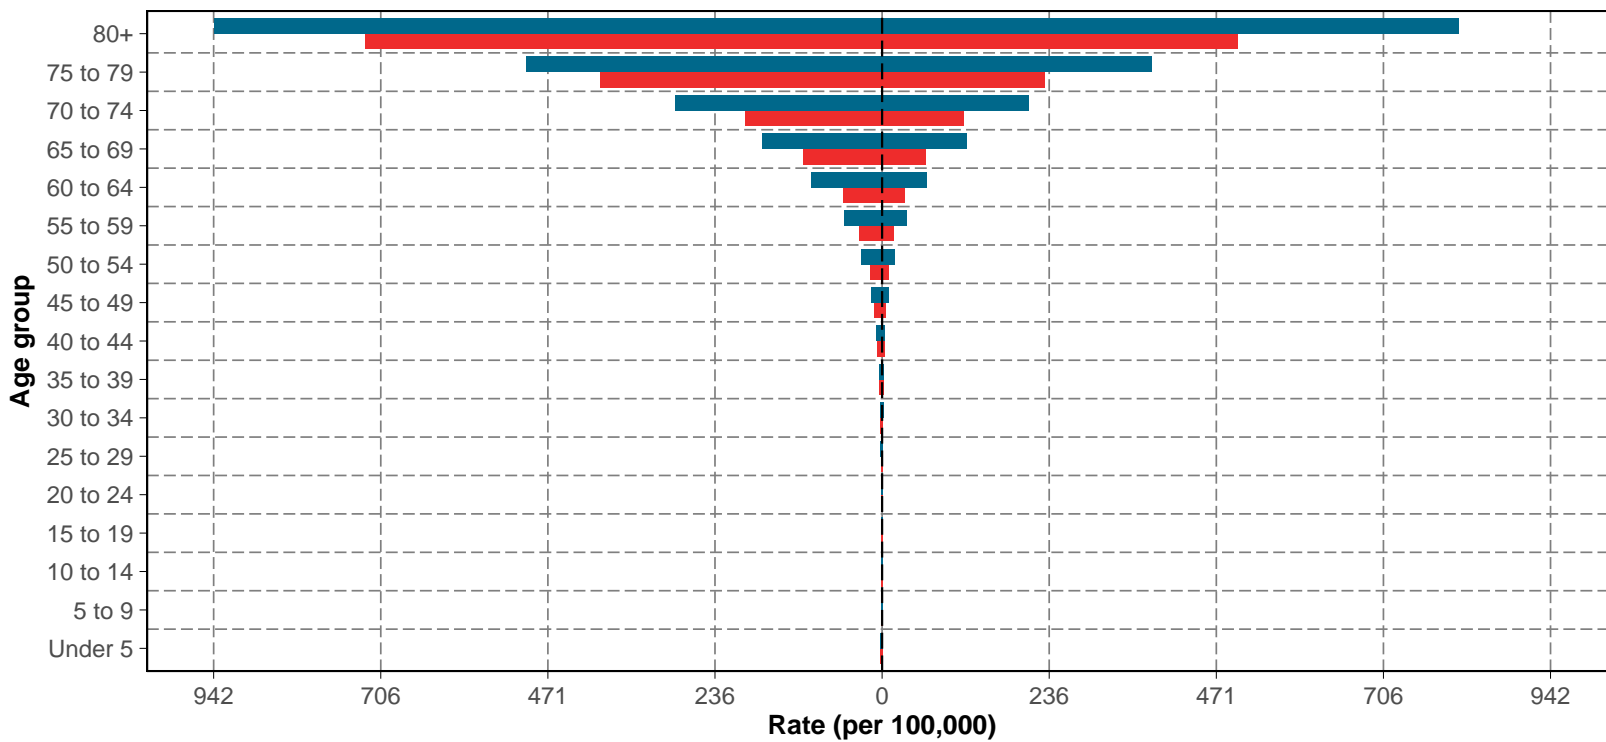

## DALYs 1990 2019

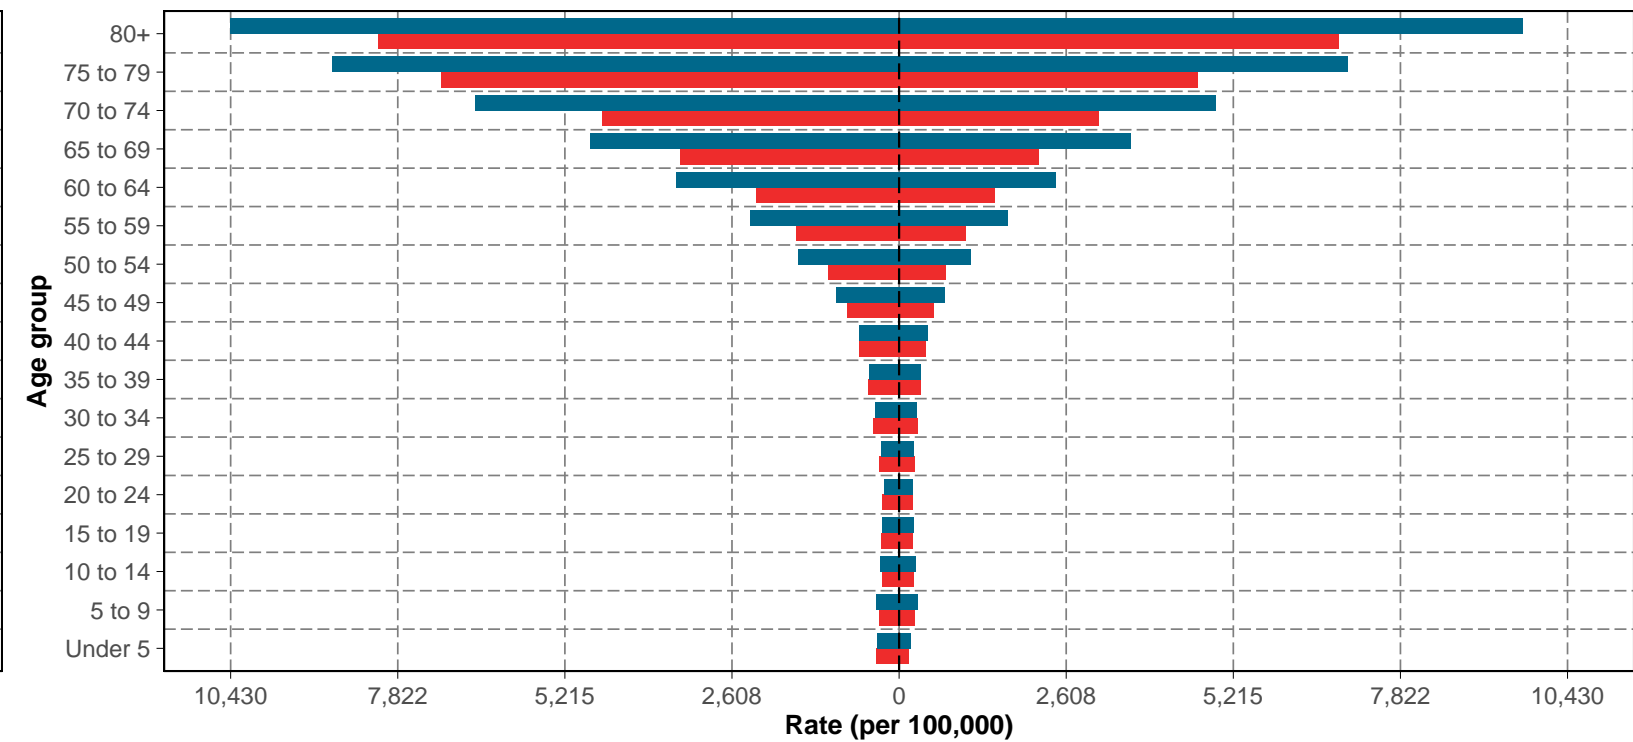

Sex  
Female Male
