# Supplementary material for: National, subnational and risk attributed burden of chronic respiratory diseases in Iran from 1990 to 2019
Source: Springer Nature journal article supplement (doi:10.1186/s12931-023-02353-1), 2023-03-11

### Age-standardized

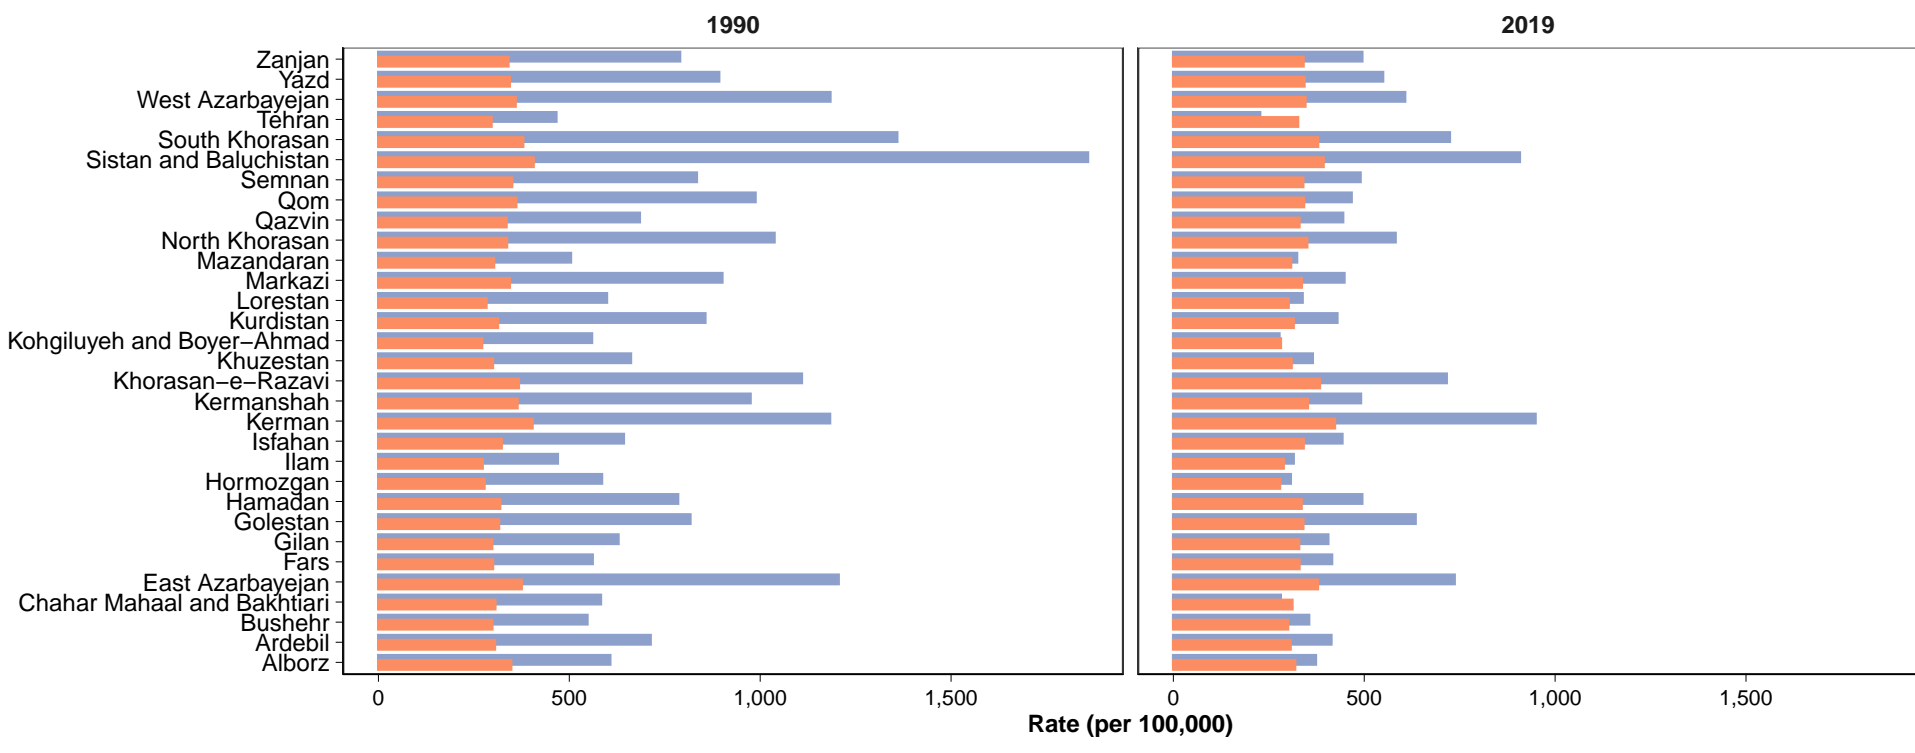

### <20 years

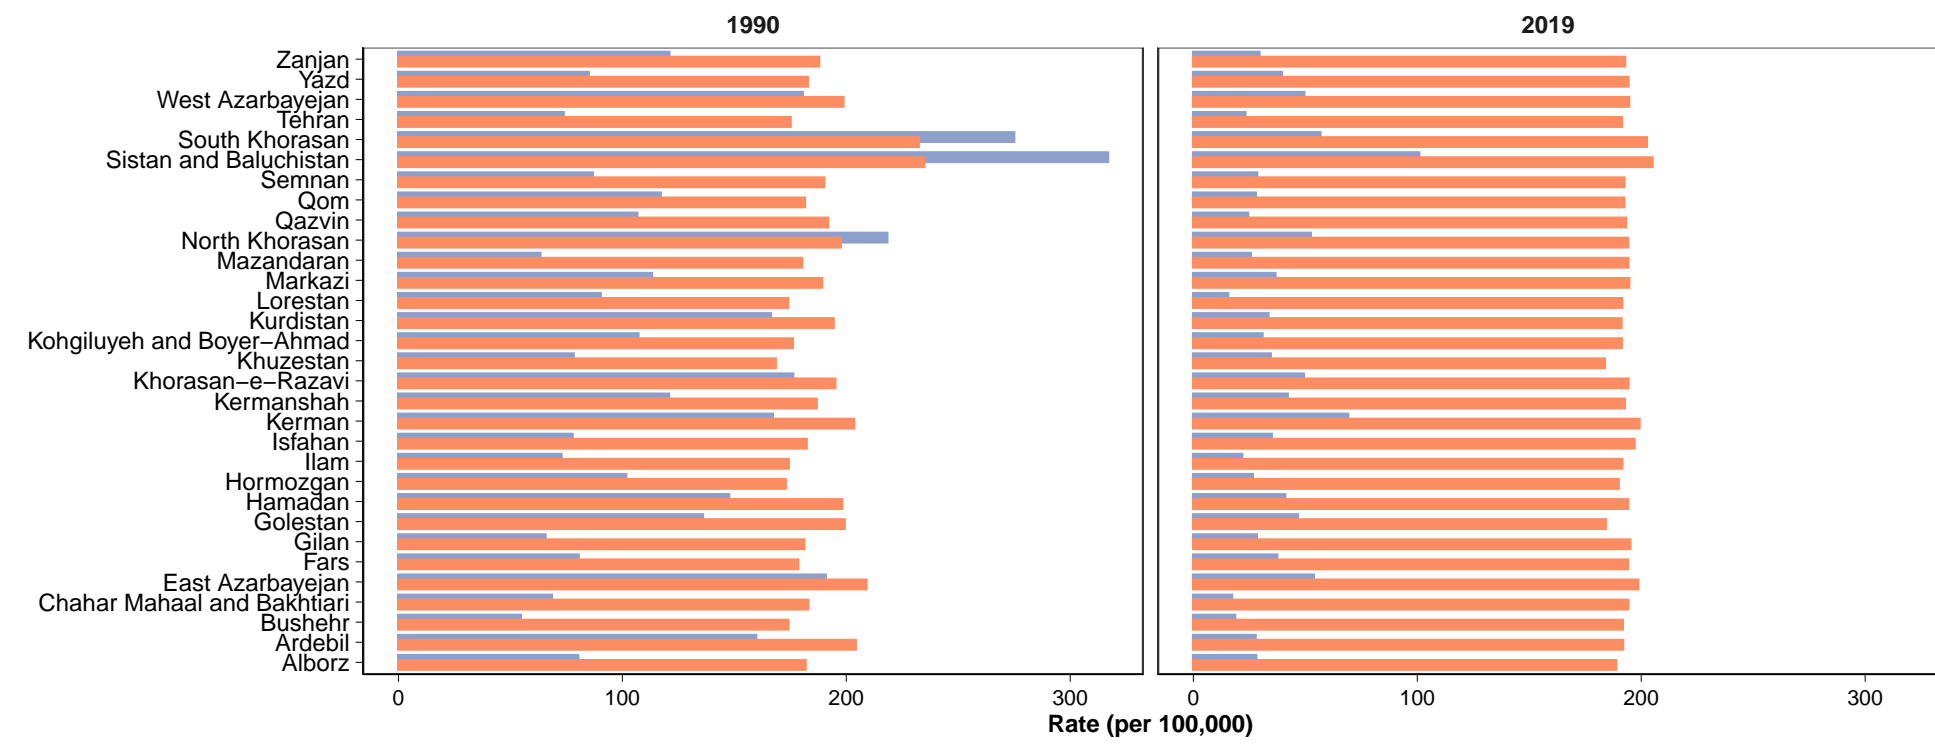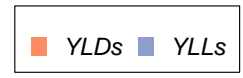

### 20 to 54 years

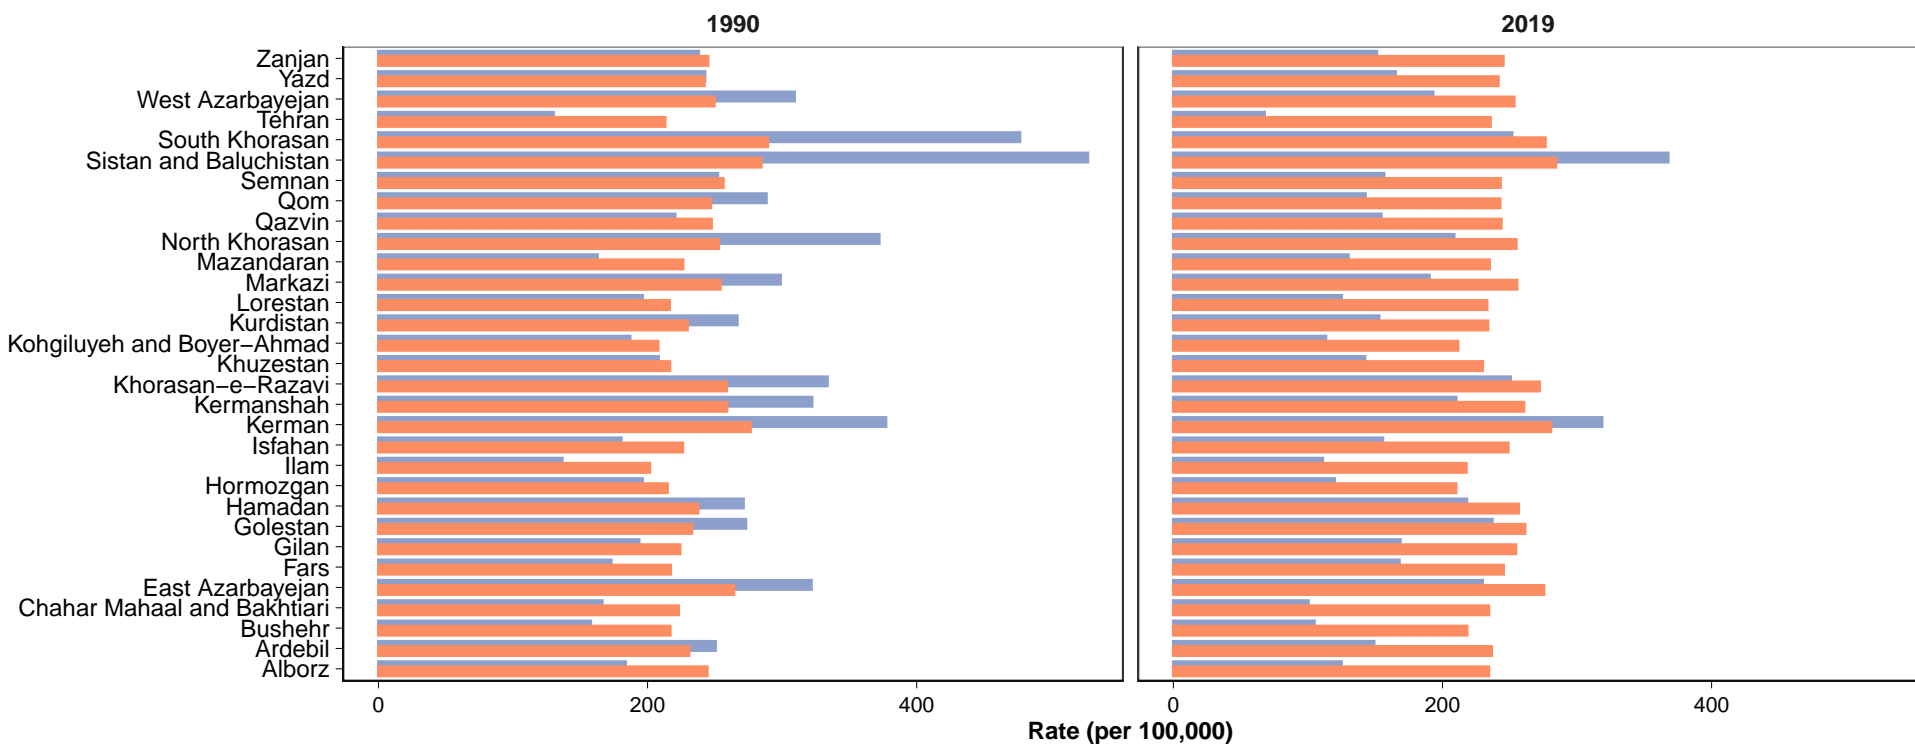

### 55 plus

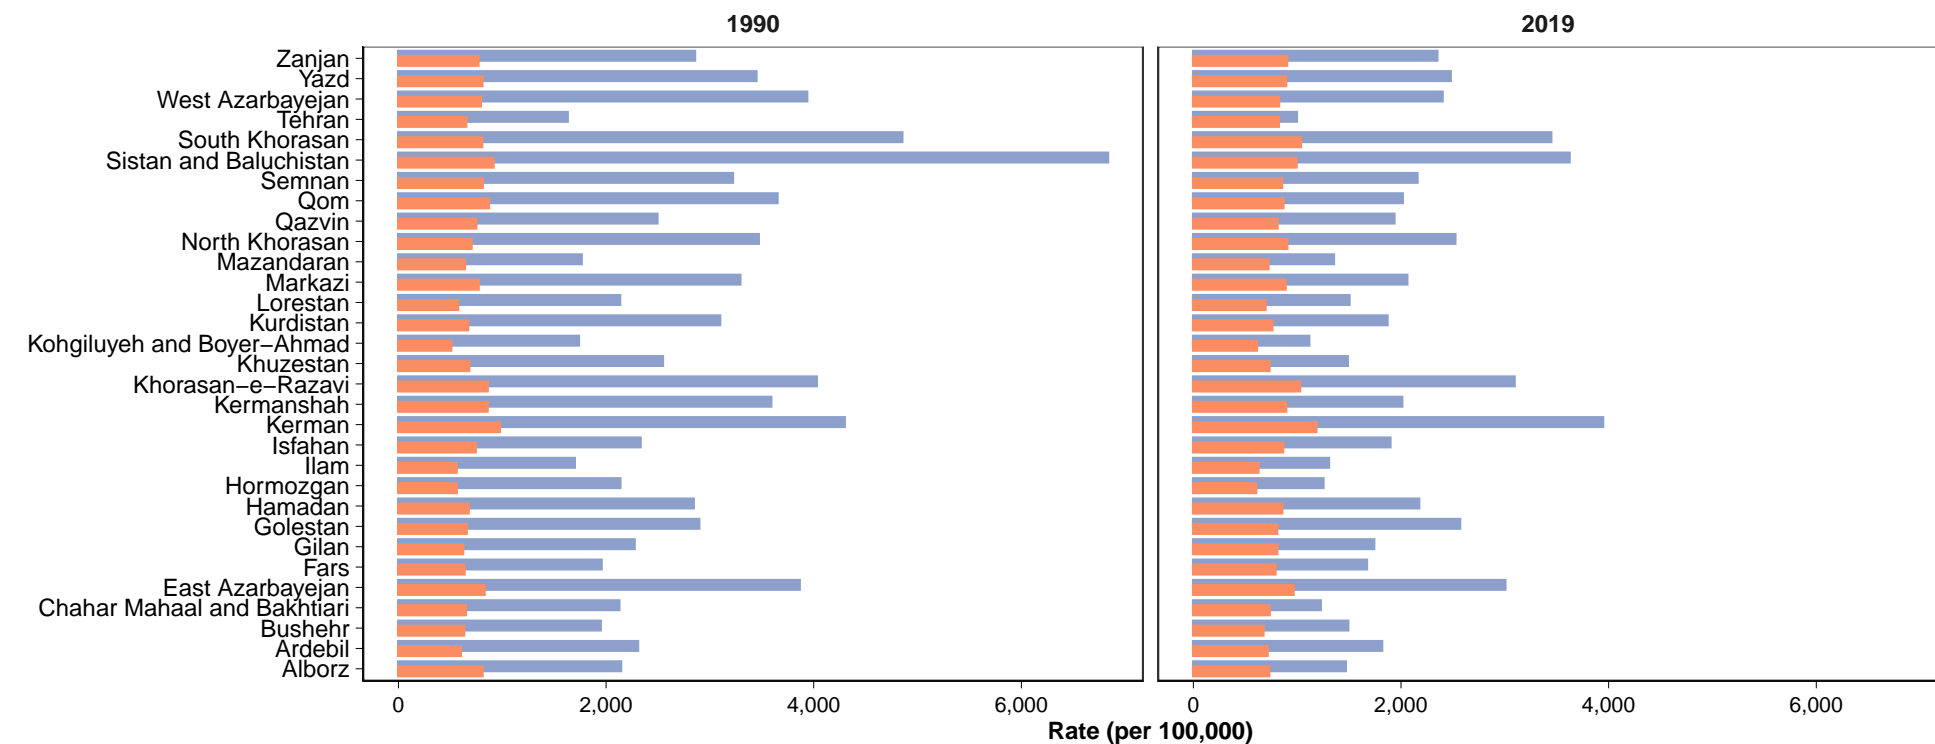

Supplement: MOESM4 [file 24613202]
