# Supplementary material for: National, subnational and risk attributed burden of chronic respiratory diseases in Iran from 1990 to 2019
Source: Springer Nature journal article supplement (doi:10.1186/s12931-023-02353-1), 2023-03-11
Supplement: MOESM5 [file 24613202]

| Cause                                 | Measure    | Age (metric)                        | Year                         |                              |                              |                                    |                              |                              | % Change (1990 to 2019) |                        |                        |
|---------------------------------------|------------|-------------------------------------|------------------------------|------------------------------|------------------------------|------------------------------------|------------------------------|------------------------------|-------------------------|------------------------|------------------------|
|                                       |            |                                     | 1990                         |                              |                              | 2019                               |                              |                              | Both                    | Female                 | Male                   |
|                                       |            |                                     | Both                         | Female                       | Male                         | Both                               | Female                       | Male                         |                         |                        |                        |
| Chronic obstructive pulmonary disease | Incidence  | All ages (number)                   | 32,052 (29,255 to 35,372)    | 14,421 (13,206 to 15,780)    | 17,630 (15,955 to 19,602)    | 103,602 (94,771 to 113,265)        | 45,891 (41,883 to 50,306)    | 57,711 (52,839 to 62,967)    | 223.2 (202.7 to 244.8)  | 218.2 (198.1 to 239.5) | 227.3 (206.4 to 250.3) |
|                                       |            | Age-standardized (rate per 100,000) | 99.2 (89.5 to 109.8)         | 90.9 (82 to 100.8)           | 106.9 (96.4 to 118.3)        | 140.6 (127.8 to 154.5)             | 129.8 (117.8 to 142.9)       | 151.7 (137.9 to 166.6)       | 41.7 (35 to 47.5)       | 42.8 (35.4 to 49.9)    | 41.9 (35.2 to 47.9)    |
|                                       | Prevalence | All ages (number)                   | 509,008 (465,525 to 555,495) | 232,079 (214,369 to 251,505) | 276,928 (251,490 to 304,832) | 1,562,415 (1,446,402 to 1,688,536) | 686,719 (633,599 to 744,997) | 875,696 (806,519 to 949,356) | 207 (194.3 to 222)      | 195.9 (183.9 to 210.2) | 216.2 (200.9 to 233.4) |
|                                       |            | Age-standardized (rate per 100,000) | 1640 (1508.2 to 1794.9)      | 1520.6 (1396.7 to 1661.9)    | 1751.8 (1600.2 to 1933.5)    | 2055.5 (1891.4 to 2232.6)          | 1832.2 (1687.7 to 1989.4)    | 2282.8 (2096.2 to 2487.5)    | 25.3 (20.9 to 29.8)     | 20.5 (15.8 to 25.3)    | 30.3 (25.4 to 35.3)    |
|                                       | Deaths     | All ages (number)                   | 4,230 (3,709 to 5,228)       | 1,641 (1,075 to 2,305)       | 2,588 (2,216 to 3,296)       | 12,557 (10,993 to 13,621)          | 4,855 (3,932 to 5,781)       | 7,701 (6,760 to 8,327)       | 196.9 (139.3 to 246.1)  | 195.9 (111.8 to 437.2) | 197.5 (126 to 253.6)   |
|                                       |            | Age-standardized (rate per 100,000) | 23.4 (20.1 to 29.4)          | 19 (12.8 to 27.4)            | 28 (23.5 to 35.3)            | 20.3 (17.7 to 22.1)                | 16.4 (12.9 to 19.6)          | 24.2 (21.3 to 26.3)          | -13 (-30.5 to 1.7)      | -13.9 (-38.3 to 49.6)  | -13.4 (-32.9 to 2.9)   |
|                                       | DALYs      | All ages (number)                   | 153,371 (138,121 to 176,277) | 63,198 (49,406 to 77,006)    | 90,173 (79,421 to 109,525)   | 372,569 (338,458 to 404,911)       | 151,368 (131,933 to 170,196) | 221,200 (199,050 to 240,391) | 142.9 (109 to 168)      | 139.5 (101.2 to 250.6) | 145.3 (97.6 to 179.1)  |
|                                       |            | Age-standardized (rate per 100,000) | 555.9 (495 to 646.6)         | 466.8 (365.9 to 593)         | 641.6 (565.9 to 776.5)       | 517.2 (471 to 560.8)               | 427.5 (371.6 to 480.7)       | 607.8 (549.4 to 662)         | -7 (-20.6 to 3.2)       | -8.4 (-26.5 to 34.4)   | -5.3 (-23.3 to 7.8)    |
|                                       | YLLs       | All ages (number)                   | 105,098 (93,069 to 126,741)  | 39,544 (24,045 to 53,086)    | 65,554 (56,326 to 84,296)    | 227,958 (205,149 to 247,566)       | 83,425 (68,878 to 100,095)   | 144,533 (128,093 to 156,202) | 116.9 (74.4 to 150.3)   | 111 (59.3 to 313.1)    | 120.5 (64 to 163.8)    |
|                                       |            | Age-standardized (rate per 100,000) | 404.4 (353.9 to 496.7)       | 317 (206.1 to 445)           | 489 (418.4 to 621.4)         | 329.1 (296.7 to 356.4)             | 248.8 (203.9 to 296.9)       | 409.7 (364.4 to 441.8)       | -18.6 (-33.8 to -5.9)   | -21.5 (-41.8 to 44.9)  | -16.2 (-36.4 to -0.3)  |
|                                       | YLDs       | All ages (number)                   | 48,273 (39,156 to 56,242)    | 23,654 (19,298 to 27,733)    | 24,619 (19,609 to 29,209)    | 144,611 (117,257 to 168,236)       | 67,944 (55,568 to 79,514)    | 76,667 (60,745 to 91,234)    | 199.6 (186.6 to 214.4)  | 187.2 (173.9 to 202.6) | 211.4 (195.6 to 230.1) |
|                                       |            | Age-standardized (rate per 100,000) | 151.5 (123.3 to 175.9)       | 149.9 (121.9 to 175)         | 152.6 (121.6 to 181.5)       | 188.1 (152.9 to 218.4)             | 178.7 (145 to 208.3)         | 198.1 (157.2 to 235.4)       | 24.2 (19.9 to 28.6)     | 19.2 (14.3 to 24.2)    | 29.8 (24.5 to 35.3)    |

| Cause          | Measure    | Age (metric)                        | Year             |                  |                  |                        |                        |                        | % Change (1990 to 2019) |                          |                        |
|----------------|------------|-------------------------------------|------------------|------------------|------------------|------------------------|------------------------|------------------------|-------------------------|--------------------------|------------------------|
|                |            |                                     | 1990             |                  |                  | 2019                   |                        |                        | Both                    | Female                   | Male                   |
|                |            |                                     | Both             | Female           | Male             | Both                   | Female                 | Male                   |                         |                          |                        |
| Pneumococcosis | Incidence  | All ages (number)                   | 290 (218 to 370) | 262 (194 to 340) | 28 (21 to 37)    | 2,027 (1,562 to 2,584) | 1,949 (1,486 to 2,497) | 78 (64 to 95)          | 600.1 (508.8 to 716.8)  | 645.4 (541.4 to 781.9)   | 177.8 (120.2 to 250.5) |
|                |            | Age-standardized (rate per 100,000) | 0.8 (0.6 to 0.9) | 1.3 (1 to 1.7)   | 0.2 (0.1 to 0.2) | 2.4 (1.9 to 3)         | 4.6 (3.5 to 5.7)       | 0.2 (0.2 to 0.3)       | 212.8 (178.5 to 251.2)  | 238.6 (201.3 to 282.3)   | 20.9 (0.2 to 45.3)     |
|                | Prevalence | All ages (number)                   | 575 (457 to 711) | 459 (352 to 583) | 117 (97 to 141)  | 5,749 (4,497 to 7,201) | 5,152 (3,866 to 6,583) | 597 (489 to 722)       | 899.3 (773 to 1025.5)   | 1023.6 (866.4 to 1189.8) | 411.2 (339.4 to 501)   |
|                |            | Age-standardized (rate per 100,000) | 1.7 (1.5 to 2.1) | 2.5 (2 to 3.2)   | 1 (0.8 to 1.2)   | 6.9 (5.6 to 8.5)       | 12.1 (9.4 to 15.2)     | 1.8 (1.5 to 2.2)       | 296 (254.6 to 335.7)    | 376.4 (327.5 to 429.6)   | 83 (60.6 to 111.5)     |
|                | Deaths     | All ages (number)                   | 12 (9 to 16)     | 2 (1 to 3)       | 10 (7 to 13)     | 68 (59 to 77)          | 17 (13 to 20)          | 51 (43 to 59)          | 452 (310.1 to 725)      | 631.7 (392.4 to 1106.6)  | 410.8 (256.3 to 774.4) |
|                |            | Age-standardized (rate per 100,000) | 0.1 (0 to 0.1)   | 0 (0 to 0)       | 0.1 (0.1 to 0.1) | 0.1 (0.1 to 0.1)       | 0.1 (0 to 0.1)         | 0.2 (0.1 to 0.2)       | 89.6 (41.9 to 174.8)    | 128.3 (46.9 to 265.4)    | 77.6 (24.5 to 207.6)   |
|                | DALYs      | All ages (number)                   | 443 (342 to 546) | 141 (104 to 189) | 303 (208 to 400) | 2,422 (2,010 to 2,890) | 1,176 (875 to 1,575)   | 1,246 (1,056 to 1,429) | 446.6 (320.8 to 635.9)  | 736.4 (551.6 to 970.1)   | 311.9 (189.8 to 556.4) |
|                |            | Age-standardized (rate per 100,000) | 1.4 (1.1 to 1.8) | 0.9 (0.6 to 1.1) | 2 (1.4 to 2.6)   | 3.1 (2.6 to 3.7)       | 2.9 (2.2 to 3.8)       | 3.4 (2.9 to 3.9)       | 117.3 (68.1 to 191.5)   | 237.9 (166.8 to 331.6)   | 69.8 (21.3 to 171)     |
|                | YLLs       | All ages (number)                   | 352 (255 to 450) | 68 (43 to 98)    | 284 (190 to 379) | 1,534 (1,329 to 1,743) | 383 (310 to 480)       | 1,151 (972 to 1,327)   | 335.8 (217.3 to 547.3)  | 460.3 (258.9 to 886.6)   | 305.8 (178.2 to 573.7) |
|                |            | Age-standardized (rate per 100,000) | 1.2 (0.9 to 1.5) | 0.5 (0.3 to 0.6) | 1.8 (1.2 to 2.4) | 2.1 (1.8 to 2.3)       | 1 (0.8 to 1.3)         | 3.1 (2.6 to 3.5)       | 77.6 (31.9 to 162.6)    | 128.8 (52.4 to 278.2)    | 68.9 (16.6 to 183.9)   |
|                | YLDs       | All ages (number)                   | 91 (58 to 134)   | 72 (45 to 109)   | 19 (12 to 28)    | 888 (570 to 1,316)     | 793 (502 to 1,191)     | 95 (61 to 140)         | 874.9 (752.9 to 1000.5) | 997.7 (846.4 to 1160.2)  | 404.7 (335.1 to 489.2) |
|                |            | Age-standardized (rate per 100,000) | 0.3 (0.2 to 0.4) | 0.4 (0.3 to 0.6) | 0.2 (0.1 to 0.2) | 1.1 (0.7 to 1.6)       | 1.9 (1.2 to 2.7)       | 0.3 (0.2 to 0.4)       | 283 (242.6 to 321.7)    | 361.2 (310.3 to 412.1)   | 80.6 (58.7 to 107.9)   |

| Cause  | Measure    | Age (metric)                        | Year                                  |                                     |                                     |                                       |                                       |                                       | % Change (1990 to 2019) |                        |                        |
|--------|------------|-------------------------------------|---------------------------------------|-------------------------------------|-------------------------------------|---------------------------------------|---------------------------------------|---------------------------------------|-------------------------|------------------------|------------------------|
|        |            |                                     | 1990                                  |                                     |                                     | 2019                                  |                                       |                                       | Both                    | Female                 | Male                   |
|        |            |                                     | Both                                  | Female                              | Male                                | Both                                  | Female                                | Male                                  |                         |                        |                        |
| Asthma | Incidence  | All ages (number)                   | 433,579<br>(323,087 to 565,952)       | 200,852<br>(153,485 to 259,953)     | 232,726<br>(171,302 to 306,562)     | 415,328<br>(327,426 to 524,205)       | 199,261<br>(160,050 to 247,080)       | 216,066<br>(167,076 to 276,398)       | -4.2 (-9.7 to 3.2)      | -0.8 (-7.4 to 7.5)     | -7.2 (-12.3 to -0.4)   |
|        |            | Age-standardized (rate per 100,000) | 646 (516.2 to 800.1)                  | 621.8 (507.1 to 763.1)              | 668.8 (527.5 to 832.9)              | 544.1 (418.9 to 689.9)                | 528.9 (417.9 to 665.2)                | 558 (425.8 to 722.2)                  | -15.8 (-20.4 to -10.9)  | -14.9 (-19 to -10.5)   | -16.6 (-21.8 to -11.5) |
|        | Prevalence | All ages (number)                   | 2,298,639<br>(1,871,634 to 2,861,152) | 1,082,051<br>(890,068 to 1,328,073) | 1,216,588<br>(980,821 to 1,535,748) | 2,635,573<br>(2,182,430 to 3,205,594) | 1,293,635<br>(1,078,608 to 1,565,478) | 1,341,938<br>(1,104,357 to 1,640,201) | 14.7 (7.9 to 24.5)      | 19.6 (11.8 to 30.1)    | 10.3 (3.4 to 20.1)     |
|        |            | Age-standardized (rate per 100,000) | 4235.2 (3602.4 to 5012)               | 4179.4 (3551.6 to 4922.6)           | 4296.4 (3634.8 to 5062.5)           | 3280.1 (2717.3 to 3978.4)             | 3241.6 (2687 to 3922.7)               | 3313.4 (2693.4 to 4042.2)             | -22.6 (-26.7 to -18)    | -22.4 (-26.5 to -18.1) | -22.9 (-27.4 to -17.6) |
|        | Deaths     | All ages (number)                   | 3,806 (3,075 to 4,777)                | 1,646 (1,112 to 2,374)              | 2,160 (1,755 to 2,738)              | 3,606 (3,095 to 4,030)                | 1,645 (1,209 to 1,935)                | 1,961 (1,728 to 2,212)                | -5.3 (-29.6 to 21.9)    | -0.1 (-36.7 to 37.1)   | -9.2 (-32 to 22)       |
|        |            | Age-standardized (rate per 100,000) | 18.5 (14 to 24.9)                     | 16.5 (9.8 to 26.1)                  | 20.6 (16.5 to 27.8)                 | 5.6 (4.8 to 6.2)                      | 5.2 (3.8 to 6.1)                      | 6 (5.3 to 6.8)                        | -69.7 (-78.9 to -59.7)  | -68.2 (-81.8 to -54.6) | -70.9 (-79.7 to -60.8) |
|        | DALYs      | All ages (number)                   | 200,080<br>(159,763 to 248,232)       | 90,398<br>(69,201 to 116,418)       | 109,682<br>(89,124 to 136,252)      | 178,733<br>(141,139 to 230,621)       | 84,388<br>(64,903 to 108,840)         | 94,344<br>(74,917 to 121,556)         | -10.7 (-21.8 to 0.7)    | -6.6 (-22.3 to 8.2)    | -14 (-25.1 to -0.2)    |
|        |            | Age-standardized (rate per 100,000) | 529.3 (431 to 652)                    | 485.3 (363.6 to 654.1)              | 571 (477.6 to 690.7)                | 232.3 (185 to 299.3)                  | 220.8 (169.9 to 284.9)                | 243.7 (194.8 to 311.8)                | -56.1 (-64.9 to -47.5)  | -54.5 (-67.1 to -42.2) | -57.3 (-65.1 to -47.4) |
|        | YLLs       | All ages (number)                   | 109,371<br>(92,951 to 129,893)        | 47,897<br>(35,730 to 61,278)        | 61,474<br>(50,716 to 74,274)        | 75,647<br>(67,236 to 86,659)          | 34,157<br>(27,060 to 41,672)          | 41,489<br>(36,911 to 47,149)          | -30.8 (-44 to -11.5)    | -28.7 (-49.5 to -6.2)  | -32.5 (-45.3 to -8.5)  |
|        |            | Age-standardized (rate per 100,000) | 365.4 (294.6 to 457.3)                | 324.3 (218.8 to 464.8)              | 404 (328.6 to 509.6)                | 104.1 (92.1 to 118.4)                 | 95 (74 to 114.7)                      | 113.4 (101.8 to 128.2)                | -71.5 (-78.9 to -62.6)  | -70.7 (-81.4 to -59.1) | -71.9 (-78.5 to -62)   |
|        | YLDs       | All ages (number)                   | 90,710 (57,164 to 136,079)            | 42,502<br>(27,084 to 63,483)        | 48,208<br>(30,134 to 72,215)        | 103,086<br>(66,253 to 155,079)        | 50,231<br>(32,406 to 74,956)          | 52,855<br>(33,835 to 79,889)          | 13.6 (6.8 to 23.9)      | 18.2 (10.4 to 28.9)    | 9.6 (2.8 to 19.5)      |
|        |            | Age-standardized (rate per 100,000) | 163.9 (106.8 to 240.2)                | 161 (104.1 to 236.5)                | 167 (107.6 to 245.3)                | 128.2 (82.4 to 190.9)                 | 125.8 (81.3 to 187.5)                 | 130.3 (82.6 to 195.5)                 | -21.8 (-26.1 to -17.1)  | -21.9 (-26.3 to -17.2) | -22 (-26.7 to -16.6)   |

| Cause                                               | Measure    | Age (metric)                        | Year                      |                           |                           |                              |                             |                             | % Change (1990 to 2019) |                        |                        |
|-----------------------------------------------------|------------|-------------------------------------|---------------------------|---------------------------|---------------------------|------------------------------|-----------------------------|-----------------------------|-------------------------|------------------------|------------------------|
|                                                     |            |                                     | 1990                      |                           |                           | 2019                         |                             |                             | Both                    | Female                 | Male                   |
|                                                     |            |                                     | Both                      | Female                    | Male                      | Both                         | Female                      | Male                        |                         |                        |                        |
| Interstitial lung disease and pulmonary sarcoidosis | Incidence  | All ages (number)                   | 79,556 (66,097 to 95,917) | 39,609 (32,821 to 47,934) | 39,947 (33,223 to 47,906) | 210,274 (170,206 to 259,196) | 107,918 (86,930 to 134,363) | 102,356 (83,020 to 125,451) | 164.3 (144.9 to 181.5)  | 172.5 (152.2 to 189.2) | 156.2 (137.1 to 174.6) |
|                                                     |            | Age-standardized (rate per 100,000) | 202.8 (163.6 to 249)      | 210.2 (168.7 to 260.8)    | 196.5 (159.9 to 239.2)    | 245 (198.5 to 298.1)         | 252 (203.6 to 309)          | 238 (193.6 to 287.5)        | 20.8 (18.4 to 22.9)     | 19.9 (17.5 to 22.5)    | 21.1 (18.6 to 23.6)    |
|                                                     | Prevalence | All ages (number)                   | 10,892 (8,945 to 13,142)  | 5,419 (4,418 to 6,569)    | 5,473 (4,520 to 6,579)    | 28,589 (23,241 to 35,098)    | 14,655 (11,915 to 18,088)   | 13,934 (11,337 to 17,072)   | 162.5 (142.3 to 179.4)  | 170.4 (150.4 to 187.4) | 154.6 (134 to 172.5)   |
|                                                     |            | Age-standardized (rate per 100,000) | 27.8 (22.7 to 33.8)       | 28.7 (23.3 to 35.3)       | 26.9 (22.2 to 32.6)       | 33.2 (27.3 to 39.9)          | 34.1 (27.8 to 41.2)         | 32.3 (26.6 to 38.6)         | 19.5 (17.2 to 22)       | 18.6 (15.7 to 21.9)    | 19.9 (17.4 to 22.8)    |
|                                                     | Deaths     | All ages (number)                   | 106 (78 to 137)           | 49 (29 to 72)             | 56 (39 to 77)             | 371 (233 to 441)             | 158 (84 to 199)             | 214 (114 to 263)            | 251.7 (139.8 to 389.6)  | 219.7 (124.2 to 481.2) | 279.7 (118.1 to 480.5) |
|                                                     |            | Age-standardized (rate per 100,000) | 0.5 (0.4 to 0.7)          | 0.5 (0.3 to 0.8)          | 0.6 (0.4 to 0.8)          | 0.6 (0.4 to 0.7)             | 0.5 (0.3 to 0.6)            | 0.6 (0.4 to 0.8)            | 5.2 (-26.8 to 52.6)     | -7.6 (-37.7 to 75.6)   | 17.9 (-30 to 89.6)     |
|                                                     | DALYs      | All ages (number)                   | 3,977 (3,121 to 4,908)    | 1,829 (1,277 to 2,418)    | 2,148 (1,621 to 2,839)    | 11,389 (7,941 to 13,899)     | 5,195 (3,486 to 6,506)      | 6,194 (3,665 to 7,717)      | 186.4 (113.7 to 262)    | 184.1 (124.6 to 288.8) | 188.3 (75.7 to 288.3)  |
|                                                     |            | Age-standardized (rate per 100,000) | 13.1 (10.1 to 16.3)       | 12.7 (8.6 to 17.4)        | 13.6 (10.2 to 17.7)       | 14.7 (10.3 to 17.7)          | 13.4 (8.8 to 16.5)          | 16.1 (9.7 to 19.6)          | 12.1 (-15.4 to 46.1)    | 5.7 (-20.9 to 57.7)    | 18.4 (-24.5 to 66.1)   |
|                                                     | YLLs       | All ages (number)                   | 2,767 (2,059 to 3,515)    | 1,232 (758 to 1,783)      | 1,535 (1,058 to 2,147)    | 8,296 (5,068 to 9,947)       | 3,623 (2,013 to 4,536)      | 4,672 (2,289 to 5,799)      | 199.8 (97.8 to 312.9)   | 194 (110.8 to 373.4)   | 204.4 (51.8 to 349)    |
|                                                     |            | Age-standardized (rate per 100,000) | 10.1 (7.4 to 13)          | 9.5 (5.6 to 14)           | 10.6 (7.4 to 14.5)        | 11.2 (6.9 to 13.4)           | 9.8 (5.3 to 12.2)           | 12.6 (6.4 to 15.5)          | 10.9 (-24.4 to 56)      | 2.4 (-29.2 to 84.6)    | 19 (-34.9 to 84.1)     |
|                                                     | YLDs       | All ages (number)                   | 1,210 (777 to 1,801)      | 596 (383 to 888)          | 614 (392 to 922)          | 3,093 (2,004 to 4,687)       | 1,571 (1,014 to 2,361)      | 1,522 (995 to 2,311)        | 155.6 (135.7 to 175)    | 163.5 (140.2 to 187.2) | 148 (126 to 168.5)     |
|                                                     |            | Age-standardized (rate per 100,000) | 3.1 (2 to 4.6)            | 3.1 (2 to 4.8)            | 3 (1.9 to 4.5)            | 3.6 (2.3 to 5.3)             | 3.6 (2.3 to 5.4)            | 3.5 (2.3 to 5.2)            | 16.1 (11.4 to 21.4)     | 15.6 (8.6 to 23.2)     | 16.3 (10.8 to 21.8)    |

| Cause                              | Measure    | Age (metric)                        | Year                    |                        |                        |                           |                          |                          | % Change (1990 to 2019) |                        |                        |
|------------------------------------|------------|-------------------------------------|-------------------------|------------------------|------------------------|---------------------------|--------------------------|--------------------------|-------------------------|------------------------|------------------------|
|                                    |            |                                     | 1990                    |                        |                        | 2019                      |                          |                          | Both                    | Female                 | Male                   |
|                                    |            |                                     | Both                    | Female                 | Male                   | Both                      | Female                   | Male                     |                         |                        |                        |
| Other chronic respiratory diseases | Incidence  | All ages (number)                   | -                       | -                      | -                      | -                         | -                        | -                        | -                       | -                      | -                      |
|                                    |            | Age-standardized (rate per 100,000) | -                       | -                      | -                      | -                         | -                        | -                        | -                       | -                      | -                      |
|                                    | Prevalence | All ages (number)                   | -                       | -                      | -                      | -                         | -                        | -                        | -                       | -                      | -                      |
|                                    |            | Age-standardized (rate per 100,000) | -                       | -                      | -                      | -                         | -                        | -                        | -                       | -                      | -                      |
|                                    | Deaths     | All ages (number)                   | 53 (35 to 102)          | 23 (13 to 52)          | 30 (20 to 55)          | 233 (78 to 329)           | 89 (31 to 124)           | 144 (43 to 212)          | 338.6 (-8.3 to 775.1)   | 288 (-22.5 to 799.2)   | 376.8 (-1.6 to 887.9)  |
|                                    |            | Age-standardized (rate per 100,000) | 0.2 (0.1 to 0.2)        | 0.1 (0.1 to 0.2)       | 0.2 (0.1 to 0.3)       | 0.3 (0.1 to 0.5)          | 0.3 (0.1 to 0.4)         | 0.4 (0.1 to 0.6)         | 100.5 (-40.8 to 249.1)  | 77.2 (-47.2 to 285.6)  | 116.4 (-40.5 to 323.9) |
|                                    | DALYs      | All ages (number)                   | 7,557 (5,760 to 11,412) | 3,822 (2,866 to 6,091) | 3,735 (2,850 to 5,532) | 22,800 (16,969 to 27,606) | 10,822 (8,414 to 12,955) | 11,978 (8,365 to 14,880) | 201.7 (66.1 to 302.4)   | 183.1 (58.1 to 276.1)  | 220.7 (73.3 to 341.9)  |
|                                    |            | Age-standardized (rate per 100,000) | 13.4 (10.8 to 18.2)     | 13.5 (10.7 to 19.2)    | 13.4 (10.5 to 18.1)    | 26.8 (19.6 to 32.5)       | 25.9 (19.7 to 31.1)      | 27.6 (18.9 to 34.6)      | 98.9 (21.4 to 156.2)    | 91.9 (19.2 to 149)     | 106.4 (22.5 to 175.9)  |
|                                    | YLLs       | All ages (number)                   | 2,693 (1,585 to 6,546)  | 1,177 (561 to 3,486)   | 1,516 (910 to 3,357)   | 7,698 (3,224 to 10,507)   | 3,080 (1,305 to 4,216)   | 4,618 (1,728 to 6,509)   | 185.8 (-40.3 to 535.9)  | 161.6 (-47.7 to 627.7) | 204.6 (-34.9 to 566.8) |
|                                    |            | Age-standardized (rate per 100,000) | 5.2 (3.5 to 9.9)        | 4.6 (2.5 to 10.4)      | 5.9 (3.9 to 10.6)      | 9.6 (3.9 to 13.2)         | 7.9 (3.2 to 10.9)        | 11.3 (4.1 to 15.9)       | 82.6 (-51.1 to 255.5)   | 71.5 (-56.3 to 290.6)  | 91.7 (-48.1 to 277.9)  |
|                                    | YLDs       | All ages (number)                   | 4,864 (3,859 to 5,859)  | 2,645 (2,107 to 3,164) | 2,219 (1,687 to 2,782) | 15,101 (12,068 to 17,928) | 7,742 (6,154 to 9,262)   | 7,359 (5,757 to 8,932)   | 210.5 (192 to 232.9)    | 192.7 (172.7 to 214.1) | 231.6 (204.6 to 267.5) |
|                                    |            | Age-standardized (rate per 100,000) | 8.2 (6.6 to 9.8)        | 8.9 (7.2 to 10.6)      | 7.5 (5.8 to 9.2)       | 17.2 (13.7 to 20.5)       | 18 (14.4 to 21.4)        | 16.4 (12.8 to 19.9)      | 109.4 (101.3 to 119)    | 102.3 (92.8 to 112)    | 117.8 (104.9 to 133.9) |

Data in parentheses are 95% Uncertainty Intervals (95% UIs)

DALYs= Disability-Adjusted Life Years; YLLs= Years of Life Lost; YLDs= Years Lived with Disability
