# Supplementary material for: National, subnational and risk attributed burden of chronic respiratory diseases in Iran from 1990 to 2019
Source: Springer Nature journal article supplement (doi:10.1186/s12931-023-02353-1), 2023-03-11
Supplement: MOESM6 [file 24613202]

| Province | Measure    | Age-standardized rate (per 100,000) |                            |                              |                              |                              |                              | % Change (1990 to 2019) |                        |                       |
|----------|------------|-------------------------------------|----------------------------|------------------------------|------------------------------|------------------------------|------------------------------|-------------------------|------------------------|-----------------------|
|          |            | 1990                                |                            |                              | 2019                         |                              |                              | Both                    | Female                 | Male                  |
|          |            | Both                                | Female                     | Male                         | Both                         | Female                       | Male                         |                         |                        |                       |
| Alborz   | Incidence  | 924.3<br>(797.4 to 1074.2)          | 907.1 (783 to 1050.3)      | 941.9 (803 to 1102.9)        | 909.6 (773.9 to 1067)        | 895.3 (767.8 to 1048.4)      | 925.8 (776.2 to 1091.6)      | -1.6 (-5.3 to 2.3)      | -1.3 (-6.5 to 3.2)     | -1.7 (-6.5 to 3.1)    |
|          | Prevalence | 5633<br>(5008.5 to 6329.2)          | 5519.8<br>(4905 to 6220.6) | 5746.7<br>(5076.3 to 6490)   | 4868.5<br>(4275.6 to 5582.2) | 4634.5<br>(4072.7 to 5347.3) | 5105.2<br>(4463.3 to 5846.7) | -13.6 (-17.9 to -9.5)   | -16 (-21.1 to -10.8)   | -11.2 (-16.5 to -5.7) |
|          | Deaths     | 33.6 (25.5 to 44)                   | 29 (17.8 to 41.1)          | 38.1 (28.2 to 52.7)          | 23.1 (19.5 to 27.4)          | 19.6 (15.5 to 25.2)          | 26.4 (21.1 to 32.7)          | -31.4 (-49.1 to -7)     | -32.2 (-56.1 to 19)    | -30.8 (-53.7 to -1.9) |
|          | DALYs      | 954 (779.1 to 1141.1)               | 857.1 (612.6 to 1075.4)    | 1043 (818.7 to 1312.5)       | 691.3 (600 to 793)           | 597.3 (506.2 to 713)         | 785.4 (660.1 to 918.3)       | -27.5 (-40.9 to -11)    | -30.3 (-45.1 to -0.8)  | -24.7 (-43.4 to -3.9) |
|          | YLLs       | 606.8<br>(449.3 to 788.5)           | 512 (295.6 to 699.4)       | 693.9<br>(487.6 to 960.7)    | 373 (315.7 to 442.7)         | 290 (230.9 to 384.7)         | 454.6 (362 to 559.6)         | -38.5 (-54.8 to -13.1)  | -43.4 (-62.8 to 8.7)   | -34.5 (-57.3 to -2.5) |
|          | YLDs       | 347.2<br>(268.1 to 430.7)           | 345.1 (267.5 to 431.4)     | 349.1<br>(264.4 to 439.2)    | 318.4 (247.2 to 397.2)       | 307.3 (238.3 to 381.5)       | 330.8 (255.3 to 418.1)       | -8.3 (-13.3 to -2.8)    | -11 (-17.4 to -3.6)    | -5.3 (-11.4 to 1.2)   |
| Ardebil  | Incidence  | 955.1<br>(823.5 to 1123.5)          | 943.4 (817.8 to 1102.6)    | 963.9<br>(818.6 to 1144)     | 906.7 (775.8 to 1058.6)      | 893.5 (771.6 to 1036.8)      | 917.9 (775.9 to 1084.9)      | -5.1 (-9.6 to -0.2)     | -5.3 (-10.4 to 0.5)    | -4.8 (-10.5 to 0.7)   |
|          | Prevalence | 5630.1<br>(5010.4 to 6416.8)        | 5637.8<br>(4961 to 6389.4) | 5605.6<br>(4932.9 to 6467.1) | 4934.1<br>(4353.5 to 5618.2) | 4752.8<br>(4171.7 to 5424.7) | 5110.4<br>(4494.6 to 5852.2) | -12.4 (-16.8 to -7.8)   | -15.7 (-21.1 to -10.2) | -8.8 (-14.2 to -3.1)  |
|          | Deaths     | 36.3 (28.9 to 48)                   | 31.7 (22.1 to 45.9)        | 40.6 (30.8 to 59.3)          | 23.8 (20.6 to 29)            | 17.5 (14.4 to 22.3)          | 30.7 (25.5 to 40.6)          | -34.3 (-51.2 to -17.1)  | -44.8 (-62.7 to -19.2) | -24.2 (-50.1 to 2.6)  |
|          | DALYs      | 1017.2<br>(850.7 to 1239.2)         | 938.1 (718 to 1205)        | 1083.3<br>(861.1 to 1436.3)  | 720.1 (630.4 to 829.5)       | 597.8 (511 to 717.3)         | 850.8 (731.3 to 1016.9)      | -29.2 (-42.2 to -17.1)  | -36.3 (-49.3 to -17.8) | -21.5 (-41 to -2.9)   |
|          | YLLs       | 712.5<br>(570.6 to 920.8)           | 626.6 (438.6 to 876.5)     | 786.2<br>(590.4 to 1134.9)   | 413.5 (355.1 to 498.6)       | 294.2 (243.6 to 389.3)       | 541.2 (449.2 to 690.2)       | -42 (-55.9 to -26.3)    | -53 (-66.4 to -29.3)   | -31.2 (-53.8 to -6.3) |
|          | YLDs       | 304.7<br>(227.5 to 396.5)           | 311.5 (234.8 to 407.4)     | 297.1<br>(218.3 to 389.8)    | 306.6 (236.6 to 386.9)       | 303.5 (235.4 to 382.3)       | 309.6 (232.8 to 395.3)       | 0.6 (-6.1 to 7.5)       | -2.5 (-10.2 to 5.8)    | 4.2 (-3.3 to 13)      |

| Province                    | Measure    | Age-standardized rate (per 100,000) |                            |                              |                              |                              |                              | % Change (1990 to 2019) |                        |                        |
|-----------------------------|------------|-------------------------------------|----------------------------|------------------------------|------------------------------|------------------------------|------------------------------|-------------------------|------------------------|------------------------|
|                             |            | 1990                                |                            |                              | 2019                         |                              |                              | Both                    | Female                 | Male                   |
|                             |            | Both                                | Female                     | Male                         | Both                         | Female                       | Male                         |                         |                        |                        |
| Bushehr                     | Incidence  | 898.6<br>(771.8 to 1056.6)          | 890.2 (774.1 to 1041.6)    | 907.1 (770 to 1067.8)        | 891.3 (757.3 to 1045.4)      | 887 (766.2 to 1034.2)        | 896.9 (753.2 to 1069.7)      | -0.8 (-5.1 to 3.4)      | -0.4 (-5.1 to 4.9)     | -1.1 (-6.9 to 4.5)     |
|                             | Prevalence | 5269.8<br>(4641.4 to 5966.7)        | 5278.5<br>(4628.8 to 5985) | 5266.6<br>(4628.7 to 6034.8) | 4736.2<br>(4138.3 to 5447.7) | 4647.5<br>(4082.1 to 5318.9) | 4833.8<br>(4190.1 to 5582.6) | -10.1 (-14.7 to -5.5)   | -12 (-17.5 to -6.2)    | -8.2 (-14.2 to -2.1)   |
|                             | Deaths     | 29.8 (22.9 to 41.1)                 | 26.7 (17.9 to 41.3)        | 33.4 (25 to 50.3)            | 21.4 (18.6 to 25.9)          | 16.8 (13.7 to 20.1)          | 26.3 (22.1 to 35.9)          | -28.2 (-45.9 to -6.2)   | -37.1 (-61.3 to -2.1)  | -21.2 (-41.4 to 6.9)   |
|                             | DALYs      | 844.8<br>(690.9 to 1061.2)          | 797.1 (615.3 to 1057.6)    | 892.4<br>(718.4 to 1214.1)   | 655 (571 to 750.7)           | 580.2 (492.9 to 672.6)       | 733.4 (632.1 to 886.4)       | -22.5 (-35.1 to -7.7)   | -27.2 (-44.1 to -5.5)  | -17.8 (-34.4 to 1.7)   |
|                             | YLLs       | 547 (416.3 to 755.2)                | 494.4 (329.5 to 736)       | 599.6<br>(443.4 to 907.4)    | 355.2 (312.6 to 428.4)       | 280.4 (231.7 to 337.3)       | 432.3 (365.4 to 572.4)       | -35.1 (-50.4 to -13.1)  | -43.3 (-61.9 to -11.8) | -27.9 (-47.6 to 0.2)   |
|                             | YLDs       | 297.8<br>(223.7 to 382.6)           | 302.8 (230.3 to 387.2)     | 292.9<br>(215.7 to 377.5)    | 299.9 (232.3 to 377.8)       | 299.8 (232.4 to 377.1)       | 301 (225.4 to 384)           | 0.7 (-5.4 to 7.6)       | -1 (-8.1 to 6.7)       | 2.8 (-5.1 to 11.4)     |
| Chahar Mahaal and Bakhtiari | Incidence  | 916.3 (790 to 1070.2)               | 885.9 (768.4 to 1035.3)    | 944.6<br>(801.2 to 1109.8)   | 898.2 (764.4 to 1052.7)      | 881.6 (761.9 to 1032.4)      | 913.3 (769.1 to 1083.5)      | -2 (-5.8 to 2.2)        | -0.5 (-5.1 to 4.3)     | -3.3 (-8.7 to 2.1)     |
|                             | Prevalence | 5404.2<br>(4759.9 to 6127.6)        | 5200.2<br>(4606.1 to 5898) | 5595.2<br>(4904.8 to 6364.4) | 4876.1<br>(4307.5 to 5568.1) | 4668.2<br>(4120.1 to 5324.3) | 5081.7 (4467 to 5836.9)      | -9.8 (-14.2 to -4.9)    | -10.2 (-15.4 to -4.9)  | -9.2 (-14.7 to -2.9)   |
|                             | Deaths     | 32 (24.8 to 54.8)                   | 26.1 (17.3 to 59.8)        | 38.3 (29 to 57)              | 16.6 (13.3 to 26.9)          | 11 (7.7 to 22.1)             | 22.7 (18.2 to 37.1)          | -48.1 (-61.5 to -32.8)  | -57.7 (-73.5 to -34.9) | -40.8 (-57.6 to -19.2) |
|                             | DALYs      | 888.1<br>(726.7 to 1266.8)          | 775.6 (593.4 to 1364.2)    | 993.6<br>(798.8 to 1331.5)   | 592.3 (496.6 to 757)         | 495.4 (398.8 to 703)         | 695.2 (579.8 to 900.2)       | -33.3 (-44.5 to -21.8)  | -36.1 (-50.7 to -19.1) | -30 (-44.7 to -14.3)   |
|                             | YLLs       | 582.4 (451 to 984.3)                | 471.6 (317.8 to 1025.6)    | 686.9<br>(511.6 to 1046.3)   | 281 (225 to 444.2)           | 187.9 (133.1 to 380.9)       | 380.2 (303.1 to 604.7)       | -51.8 (-63.3 to -37.5)  | -60.2 (-73.5 to -37.8) | -44.7 (-60.7 to -23.6) |
|                             | YLDs       | 305.7<br>(229.6 to 392.1)           | 304 (231.4 to 386.5)       | 306.7<br>(228.6 to 397)      | 311.3 (241.2 to 393.7)       | 307.4 (239.3 to 384.6)       | 315 (238.5 to 406.7)         | 1.9 (-4 to 8.7)         | 1.1 (-5.9 to 9.1)      | 2.7 (-4.7 to 11.5)     |

| Province         | Measure    | Age-standardized rate (per 100,000) |                              |                              |                              |                              |                              | % Change (1990 to 2019) |                        |                       |
|------------------|------------|-------------------------------------|------------------------------|------------------------------|------------------------------|------------------------------|------------------------------|-------------------------|------------------------|-----------------------|
|                  |            | 1990                                |                              |                              | 2019                         |                              |                              | Both                    | Female                 | Male                  |
|                  |            | Both                                | Female                       | Male                         | Both                         | Female                       | Male                         |                         |                        |                       |
| East Azarbaijean | Incidence  | 1057.4<br>(919.1 to 1224.8)         | 1048.5 (920 to 1211.9)       | 1063.5<br>(917.3 to 1241.9)  | 999 (869.3 to 1160.7)        | 987.7 (863.1 to 1147.8)      | 1009.2<br>(872.6 to 1184.9)  | -5.5 (-9.9 to -0.8)     | -5.8 (-10.9 to -0.9)   | -5.1 (-10.5 to 0.1)   |
|                  | Prevalence | 6565.4<br>(5864.8 to 7416)          | 6591.7<br>(5862.3 to 7439.3) | 6525.2<br>(5769.5 to 7410.1) | 5740.8<br>(5102.6 to 6437.7) | 5555.5<br>(4938.9 to 6250)   | 5922.8<br>(5237.7 to 6708.4) | -12.6 (-17 to -8)       | -15.7 (-20.8 to -10.4) | -9.2 (-14.7 to -3)    |
|                  | Deaths     | 72.2 (51.2 to 90.2)                 | 66.5 (37.5 to 95.1)          | 77.5 (57.9 to 99.9)          | 49.3 (34.2 to 57.8)          | 43.2 (23.2 to 54.9)          | 55.6 (40.1 to 66.7)          | -31.7 (-47.5 to -12.5)  | -35 (-58.3 to -5.2)    | -28.3 (-48.7 to -3.8) |
|                  | DALYs      | 1579.8<br>(1265.9 to 1884.3)        | 1477.6<br>(1031 to 1920.6)   | 1668<br>(1312.5 to 2070.9)   | 1114.5<br>(894.4 to 1264.6)  | 997.3 (744.2 to 1176.6)      | 1233.7<br>(994.7 to 1440.5)  | -29.5 (-41 to -15.1)    | -32.5 (-49 to -10.6)   | -26 (-43.2 to -5)     |
|                  | YLLs       | 1205.1<br>(890.7 to 1482.2)         | 1094.1<br>(676.6 to 1499.6)  | 1302.7<br>(966.4 to 1684.3)  | 736.4 (535 to 856)           | 622.9 (368.8 to 783.6)       | 851.9 (632.6 to 1026.7)      | -38.9 (-52.6 to -21.3)  | -43.1 (-60.9 to -15)   | -34.6 (-54.2 to -7.2) |
|                  | YLDs       | 374.7<br>(282.7 to 475.7)           | 383.5 (292.8 to 483.5)       | 365.2<br>(271.6 to 472.9)    | 378.1 (294.3 to 468.2)       | 374.5 (293.6 to 462.8)       | 381.8 (295.3 to 475.8)       | 0.9 (-5.1 to 8)         | -2.4 (-9.1 to 5.9)     | 4.5 (-3.2 to 14)      |
| Fars             | Incidence  | 900.8<br>(772.7 to 1049.3)          | 881.5 (762.2 to 1028.5)      | 920.8<br>(776.5 to 1075.8)   | 914.3 (780.6 to 1075.5)      | 902.3 (777.1 to 1053.2)      | 926.1 (789.3 to 1099.5)      | 1.5 (-2.5 to 5.4)       | 2.4 (-2.3 to 7.8)      | 0.6 (-4.7 to 5.4)     |
|                  | Prevalence | 5272.6<br>(4659.6 to 5984.5)        | 5189.6<br>(4579.8 to 5917.4) | 5367.3<br>(4707.5 to 6116.6) | 5039.8<br>(4454.9 to 5730.8) | 4827.6<br>(4259.6 to 5502.1) | 5250.7<br>(4612.9 to 5973.5) | -4.4 (-8.7 to 0.1)      | -7 (-12.4 to -1.3)     | -2.2 (-7.8 to 4.5)    |
|                  | Deaths     | 30.7 (23.5 to 48.6)                 | 25.3 (16.4 to 45.9)          | 37 (27.7 to 59.2)            | 24.5 (20.3 to 30.5)          | 19.9 (15.6 to 26)            | 28.9 (23.2 to 36.6)          | -20.3 (-43.5 to 8.6)    | -21.1 (-50.9 to 30.3)  | -21.9 (-47.2 to 13.4) |
|                  | DALYs      | 860.4<br>(699.3 to 1177.9)          | 763 (569.1 to 1130.6)        | 961.1<br>(754.2 to 1373.7)   | 745.1 (642.7 to 868.5)       | 643.2 (539.9 to 780.6)       | 847.1 (707.9 to 1010.7)      | -13.4 (-32 to 5.1)      | -15.7 (-37.8 to 13.3)  | -11.9 (-34.8 to 14)   |
|                  | YLLs       | 560.8 (430 to 876.9)                | 463.1 (296.7 to 821.9)       | 661.4<br>(482.7 to 1116.2)   | 415.3 (343.7 to 516.5)       | 320.3 (251.9 to 445.4)       | 509.8 (409.1 to 649.6)       | -25.9 (-47.4 to 1.3)    | -30.8 (-55 to 17.2)    | -22.9 (-49.4 to 16.2) |
|                  | YLDs       | 299.6<br>(227.8 to 386.3)           | 299.9 (227.3 to 387.1)       | 299.8 (224 to 389.3)         | 329.9 (255.9 to 411.9)       | 322.8 (251.9 to 402.2)       | 337.3 (259 to 428.3)         | 10.1 (2.6 to 18)        | 7.6 (-0.7 to 17)       | 12.5 (3.8 to 22.5)    |

| Province | Measure    | Age-standardized rate (per 100,000) |                           |                           |                           |                           |                           | % Change (1990 to 2019) |                       |                       |
|----------|------------|-------------------------------------|---------------------------|---------------------------|---------------------------|---------------------------|---------------------------|-------------------------|-----------------------|-----------------------|
|          |            | 1990                                |                           |                           | 2019                      |                           |                           |                         |                       |                       |
|          |            | Both                                | Female                    | Male                      | Both                      | Female                    | Male                      | Both                    | Female                | Male                  |
| Gilan    | Incidence  | 922 (791.2 to 1070.7)               | 888.4 (769.9 to 1033)     | 956.7 (811.2 to 1116)     | 928.1 (796.6 to 1089.6)   | 901.3 (777.2 to 1048.7)   | 954.6 (808.6 to 1138.7)   | 0.7 (-3.7 to 5)         | 1.4 (-3.6 to 6.2)     | -0.2 (-5.8 to 5.7)    |
|          | Prevalence | 5415.7 (4751.6 to 6209)             | 5197.1 (4536.8 to 5917.9) | 5659.4 (4970.2 to 6449.1) | 5144.7 (4534.1 to 5886.2) | 4803.1 (4235.7 to 5443.9) | 5489.3 (4824.4 to 6278.9) | -5 (-9.5 to 0.1)        | -7.6 (-12.9 to -1.8)  | -3 (-9.2 to 3.8)      |
|          | Deaths     | 34.1 (27.5 to 44.6)                 | 27.2 (19.2 to 38.7)       | 43.3 (33.8 to 59.4)       | 23.4 (19.9 to 27.2)       | 17.7 (14.3 to 22.4)       | 29.1 (23.8 to 35.3)       | -31.3 (-48.9 to -12.3)  | -34.8 (-55.8 to -0.9) | -32.8 (-53.1 to -9.1) |
|          | DALYs      | 925.6 (776.1 to 1120.1)             | 780.6 (607.3 to 997.4)    | 1092.2 (884.6 to 1384.4)  | 734.3 (640.9 to 839.6)    | 600.2 (508.1 to 705.6)    | 871.7 (739.8 to 1013.2)   | -20.7 (-34.8 to -6.5)   | -23.1 (-38.8 to -1.2) | -20.2 (-39.4 to 0.1)  |
|          | YLLs       | 628.3 (506.1 to 808.7)              | 489.1 (341.1 to 691.5)    | 788.3 (611.4 to 1078.8)   | 405.4 (344.6 to 471.9)    | 288.1 (233.4 to 368.5)    | 525.4 (424.9 to 637.3)    | -35.5 (-51.8 to -16.5)  | -41.1 (-59.3 to -9.3) | -33.4 (-55 to -6.3)   |
|          | YLDs       | 297.3 (222.7 to 382.9)              | 291.5 (219 to 375.3)      | 303.9 (223.6 to 393.6)    | 328.9 (254.1 to 415.4)    | 312.1 (240.4 to 394.7)    | 346.3 (263.5 to 441.8)    | 10.6 (3.1 to 18.9)      | 7.1 (-0.5 to 15.9)    | 14 (4.1 to 25.4)      |
| Golestan | Incidence  | 979.6 (847.8 to 1140.8)             | 962.2 (838.7 to 1118.2)   | 995.6 (848.3 to 1170)     | 956.6 (836.4 to 1110.7)   | 943 (825.5 to 1089.5)     | 969.7 (841.9 to 1128.7)   | -2.3 (-6.8 to 2)        | -2 (-7.2 to 3.7)      | -2.6 (-8.1 to 2.8)    |
|          | Prevalence | 5880 (5184.2 to 6736.5)             | 5862.3 (5175.8 to 6688.4) | 5898 (5180.8 to 6786.2)   | 5484.5 (4874.1 to 6184)   | 5295.9 (4715.5 to 6016.9) | 5676.7 (5062.7 to 6407)   | -6.7 (-11.1 to -2.2)    | -9.7 (-14.5 to -3.8)  | -3.8 (-9.2 to 2.1)    |
|          | Deaths     | 41.4 (33 to 51.4)                   | 34 (23.7 to 47.7)         | 49.9 (37.5 to 65.4)       | 34.4 (27.7 to 39.2)       | 26.1 (16.2 to 32.5)       | 43.1 (35.3 to 51.2)       | -16.9 (-36.7 to 8.1)    | -23.4 (-53.6 to 14.4) | -13.5 (-37.8 to 18.6) |
|          | DALYs      | 1132.2 (944 to 1338.1)              | 998.7 (754.2 to 1235.9)   | 1266.1 (1006.9 to 1584.7) | 973.9 (827.4 to 1104.8)   | 805.9 (620.4 to 936.5)    | 1152.7 (961.6 to 1326.8)  | -14 (-28.5 to 4.7)      | -19.3 (-38.1 to 5.8)  | -9 (-30.6 to 15.5)    |
|          | YLLs       | 816.7 (652.2 to 999.4)              | 679.4 (463.9 to 901.5)    | 954.7 (715.1 to 1261.5)   | 634.1 (506.6 to 722.9)    | 473.9 (295.1 to 587.9)    | 804.4 (647.4 to 955.7)    | -22.4 (-40.6 to 1.6)    | -30.3 (-54 to 6.1)    | -15.7 (-40.4 to 16.5) |
|          | YLDs       | 315.4 (233.8 to 411.7)              | 319.3 (239.6 to 414.2)    | 311.4 (228.2 to 409)      | 339.8 (261.3 to 424.9)    | 332 (258.3 to 416.8)      | 348.3 (266 to 437.8)      | 7.7 (0.7 to 16.2)       | 4 (-3.3 to 12.8)      | 11.9 (3.1 to 22.9)    |

| Province  | Measure    | Age-standardized rate (per 100,000) |                              |                              |                              |                              |                              | % Change (1990 to 2019) |                        |                        |
|-----------|------------|-------------------------------------|------------------------------|------------------------------|------------------------------|------------------------------|------------------------------|-------------------------|------------------------|------------------------|
|           |            | 1990                                |                              |                              | 2019                         |                              |                              | Both                    | Female                 | Male                   |
|           |            | Both                                | Female                       | Male                         | Both                         | Female                       | Male                         |                         |                        |                        |
| Hamadan   | Incidence  | 950.8<br>(822.7 to 1111.9)          | 915.8 (792.8 to 1064.8)      | 982.5<br>(836.1 to 1164)     | 916.7 (787.3 to 1079)        | 891 (772.9 to 1050.4)        | 942.4 (799.3 to 1118.6)      | -3.6 (-8 to 0.9)        | -2.7 (-8 to 3.5)       | -4.1 (-10.5 to 1.5)    |
|           | Prevalence | 5698.5<br>(5025.9 to 6488.9)        | 5463.4<br>(4849.1 to 6188.5) | 5906.9<br>(5212.6 to 6753.4) | 5166 (4568.5 to 5888.9)      | 4800.1<br>(4244.7 to 5488.7) | 5537.6<br>(4882.6 to 6308.4) | -9.3 (-13.5 to -5.2)    | -12.1 (-17.4 to -6.9)  | -6.3 (-11.6 to -0.5)   |
|           | Deaths     | 40.1 (32.3 to 54.7)                 | 34.1 (23.2 to 55.1)          | 45.5 (35 to 61.9)            | 27 (22.5 to 32.7)            | 20.8 (16.7 to 30.3)          | 33.4 (26.8 to 40.3)          | -32.7 (-47.3 to -14.9)  | -38.9 (-57.7 to -1.1)  | -26.6 (-47.7 to 2.3)   |
|           | DALYs      | 1102.8<br>(922.7 to 1359.3)         | 943.2 (731.1 to 1320.1)      | 1244.4<br>(1005 to 1568)     | 829.7 (718.9 to 951.6)       | 666 (565.9 to 839.9)         | 999 (841.8 to 1164.6)        | -24.8 (-37.2 to -11.8)  | -29.4 (-44.4 to -5.8)  | -19.7 (-38.1 to 3.5)   |
|           | YLLs       | 784.5<br>(635.7 to 1045.2)          | 630.4 (431.4 to 1004.7)      | 921.7<br>(704.7 to 1247.8)   | 494.3 (415.1 to 601.3)       | 348.2 (280.6 to 517.8)       | 644.8 (518.8 to 783)         | -37 (-51.1 to -20.3)    | -44.8 (-61.1 to -10.6) | -30 (-51.2 to -1.7)    |
|           | YLDs       | 318.3<br>(240.4 to 410.4)           | 312.7 (238.4 to 402.3)       | 322.7<br>(238.2 to 418.7)    | 335.3 (260.5 to 416.8)       | 317.8 (249.3 to 398.4)       | 354.2 (271.6 to 446.9)       | 5.3 (-1.6 to 12.8)      | 1.6 (-6 to 10.2)       | 9.8 (0.9 to 20)        |
| Hormozgan | Incidence  | 852.5<br>(731.4 to 1001.6)          | 852.5 (733.7 to 1003.4)      | 853.9<br>(720.8 to 1005.5)   | 858.7 (728.5 to 1019.2)      | 839.8 (715 to 988.1)         | 877.5 (738.1 to 1045.1)      | 0.7 (-3.7 to 5)         | -1.5 (-6.8 to 4.2)     | 2.8 (-2.3 to 7.8)      |
|           | Prevalence | 4921<br>(4349.8 to 5590.1)          | 4957.7<br>(4380 to 5636.2)   | 4893.2<br>(4300.8 to 5603.3) | 4490.8<br>(3933.9 to 5198.6) | 4257.2<br>(3720.9 to 4938.9) | 4724.2<br>(4139.1 to 5475.6) | -8.7 (-13.3 to -4.3)    | -14.1 (-19.7 to -8.4)  | -3.5 (-8.9 to 2)       |
|           | Deaths     | 29.5 (22.2 to 43.9)                 | 24.2 (16.3 to 38)            | 35.2 (25.6 to 57)            | 16.9 (14.2 to 21.6)          | 14.6 (11.8 to 20.2)          | 19.4 (15.6 to 26.4)          | -42.9 (-56.6 to -23.4)  | -39.6 (-58.1 to -6.3)  | -45 (-61.6 to -21.1)   |
|           | DALYs      | 862.4<br>(680.3 to 1126.9)          | 762.8 (579 to 1002)          | 954.8 (728 to 1341.3)        | 585.9 (506.6 to 695)         | 512.1 (433.4 to 614.4)       | 663.1 (556.9 to 808.7)       | -32.1 (-44.3 to -14.3)  | -32.9 (-46.3 to -10.9) | -30.5 (-47.3 to -8.5)  |
|           | YLLs       | 585.1<br>(412.7 to 839)             | 481.6 (312.8 to 733.5)       | 681.2<br>(459.2 to 1102)     | 307.1 (261.3 to 387.9)       | 246 (199.9 to 343.3)         | 371.3 (298.8 to 493.7)       | -47.5 (-60 to -24.1)    | -48.9 (-63.7 to -14.9) | -45.5 (-62.4 to -16.6) |
|           | YLDs       | 277.3<br>(208.9 to 358.6)           | 281.2 (214 to 362.6)         | 273.5<br>(203.1 to 353.6)    | 278.7 (215.7 to 350.8)       | 266.1 (203.9 to 336.6)       | 291.8 (221.7 to 372)         | 0.5 (-4.9 to 6.5)       | -5.4 (-11.9 to 2)      | 6.7 (-0.6 to 14.5)     |

| Province | Measure    | Age-standardized rate (per 100,000) |                              |                             |                              |                              |                              | % Change (1990 to 2019) |                       |                      |
|----------|------------|-------------------------------------|------------------------------|-----------------------------|------------------------------|------------------------------|------------------------------|-------------------------|-----------------------|----------------------|
|          |            | 1990                                |                              |                             | 2019                         |                              |                              | Both                    | Female                | Male                 |
|          |            | Both                                | Female                       | Male                        | Both                         | Female                       | Male                         |                         |                       |                      |
| Ilam     | Incidence  | 849.3<br>(725.5 to 996)             | 838.5 (720.3 to 979.1)       | 858.5<br>(726.3 to 1013.6)  | 875.6 (747.4 to 1041.2)      | 870 (752.3 to 1023.5)        | 880.8 (740.9 to 1066.5)      | 3.1 (-0.9 to 7.5)       | 3.8 (-0.8 to 9.3)     | 2.6 (-3 to 8.1)      |
|          | Prevalence | 4817.8<br>(4214.7 to 5511.6)        | 4774.1<br>(4175.3 to 5475.5) | 4849.5<br>(4243 to 5565.7)  | 4552.6<br>(3971.7 to 5297.9) | 4479.5<br>(3929.7 to 5156.7) | 4622.7<br>(3987.4 to 5380.3) | -5.5 (-10.1 to -0.5)    | -6.2 (-11.4 to -0.3)  | -4.7 (-10.8 to 1.5)  |
|          | Deaths     | 24.9 (18.7 to 44)                   | 21.3 (13.5 to 42.3)          | 27.9 (20.5 to 53.4)         | 18.7 (15.9 to 28.9)          | 14.9 (11.8 to 22.3)          | 21.8 (17.8 to 36.3)          | -24.9 (-46.9 to -1.4)   | -29.8 (-59.3 to 14.5) | -22 (-46.5 to 5.4)   |
|          | DALYs      | 742.1<br>(595.9 to 1096.2)          | 683.8 (512 to 1065.9)        | 785.1<br>(616.7 to 1258)    | 603.2 (516.8 to 760)         | 547 (456.8 to 699)           | 652.5 (550.7 to 877.2)       | -18.7 (-34.3 to -3.6)   | -20 (-40.7 to 4.8)    | -16.9 (-35.6 to 1.8) |
|          | YLLs       | 469.5<br>(352.2 to 818.2)           | 406.9 (258 to 811.7)         | 516.9<br>(377.1 to 977.9)   | 314.7 (268.1 to 475)         | 255.2 (203.4 to 394.4)       | 366.9 (301.5 to 593.1)       | -33 (-49.9 to -10.5)    | -37.3 (-61.5 to 4.1)  | -29 (-49.7 to -2.3)  |
|          | YLDs       | 272.6 (203 to 351.1)                | 276.9 (207.3 to 355)         | 268.2<br>(198.1 to 346.1)   | 288.4 (223.2 to 365.6)       | 291.8 (226.6 to 370)         | 285.6 (216.7 to 365.1)       | 5.8 (-0.4 to 12.8)      | 5.4 (-1.8 to 13.4)    | 6.5 (-1.1 to 15.3)   |
| Isfahan  | Incidence  | 929.8<br>(802.5 to 1088.2)          | 895.4 (777.6 to 1040.9)      | 966.5<br>(821.3 to 1136.5)  | 931.9 (804.6 to 1093.7)      | 913.9 (794.5 to 1066.7)      | 949.4 (807.7 to 1126.6)      | 0.2 (-3.9 to 4.1)       | 2.1 (-2.7 to 6.9)     | -1.8 (-7.3 to 3.5)   |
|          | Prevalence | 5550.7<br>(4921 to 6277)            | 5328.2<br>(4696.8 to 6070)   | 5800<br>(5104.4 to 6575.6)  | 5155.2<br>(4545.7 to 5864.2) | 4884.6<br>(4319.5 to 5590.7) | 5419.3<br>(4754.2 to 6223.8) | -7.1 (-11.4 to -2.4)    | -8.3 (-13.5 to -2.9)  | -6.6 (-12.2 to -0.3) |
|          | Deaths     | 37.1 (28.4 to 49.4)                 | 31.6 (21.7 to 49)            | 43.4 (32.3 to 58.5)         | 27.1 (22.8 to 31.9)          | 22.4 (17.5 to 28.2)          | 31.5 (24.9 to 38.4)          | -27 (-46.5 to 0.8)      | -29.2 (-56.6 to 13.1) | -27.5 (-49.9 to 2.6) |
|          | DALYs      | 964.7<br>(776.7 to 1182.3)          | 848.2 (639.4 to 1162.1)      | 1087.4<br>(865.8 to 1357.9) | 783.1 (676.3 to 900.2)       | 673.2 (571.5 to 799.1)       | 890.5 (752.7 to 1040.4)      | -18.8 (-33.8 to 0.6)    | -20.6 (-39.9 to 5.6)  | -18.1 (-37.3 to 4.5) |
|          | YLLs       | 642.4 (493 to 846.8)                | 534.4 (352.4 to 822.1)       | 755 (557.6 to 1013.9)       | 442.4 (369.2 to 526.2)       | 344.4 (271.1 to 451.9)       | 537.6 (426.6 to 658)         | -31.1 (-49.9 to -3.3)   | -35.5 (-58.2 to 5.8)  | -28.8 (-51.7 to 4.8) |
|          | YLDs       | 322.3<br>(244.8 to 410.9)           | 313.8 (238.3 to 402.3)       | 332.4<br>(247.5 to 427.8)   | 340.8 (265.9 to 423.5)       | 328.7 (256.5 to 409.8)       | 352.9 (270.3 to 443)         | 5.7 (-0.8 to 13.2)      | 4.8 (-2.9 to 13.3)    | 6.2 (-1.9 to 15.1)   |

| Province   | Measure    | Age-standardized rate (per 100,000) |                           |                           |                           |                           |                           | % Change (1990 to 2019) |                        |                        |
|------------|------------|-------------------------------------|---------------------------|---------------------------|---------------------------|---------------------------|---------------------------|-------------------------|------------------------|------------------------|
|            |            | 1990                                |                           |                           | 2019                      |                           |                           |                         |                        |                        |
|            |            | Both                                | Female                    | Male                      | Both                      | Female                    | Male                      | Both                    | Female                 | Male                   |
| Kerman     | Incidence  | 1050 (914.3 to 1216.2)              | 1008.8 (878.8 to 1167.1)  | 1088.6 (936.4 to 1274.7)  | 1003 (871.3 to 1160.4)    | 977.3 (854.3 to 1119.8)   | 1027.9 (886.6 to 1204.9)  | -4.5 (-9.1 to 0.1)      | -3.1 (-8.6 to 2)       | -5.6 (-11 to -0.1)     |
|            | Prevalence | 6748.5 (6064 to 7536.9)             | 6399.6 (5727.9 to 7166.7) | 7075.1 (6302.9 to 7905.2) | 6042.7 (5426.9 to 6784.9) | 5728.7 (5139 to 6444.7)   | 6354 (5714.8 to 7171.5)   | -10.5 (-14.8 to -6)     | -10.5 (-15.8 to -5.5)  | -10.2 (-15.3 to -4.3)  |
|            | Deaths     | 63 (46.5 to 76.8)                   | 49.5 (29.9 to 68.9)       | 78 (58.2 to 100.5)        | 58.5 (29.4 to 68.7)       | 47.6 (19.8 to 60.4)       | 69.4 (34.8 to 82.6)       | -7.1 (-39.2 to 17.7)    | -3.9 (-47.5 to 44.4)   | -11 (-42.8 to 20.1)    |
|            | DALYs      | 1585.7 (1284.7 to 1867.2)           | 1299 (928.8 to 1630.3)    | 1865 (1479.8 to 2290.7)   | 1371 (885.8 to 1571.6)    | 1139.3 (721.3 to 1360.9)  | 1601.8 (998.8 to 1868.7)  | -13.5 (-32.7 to 3.4)    | -12.3 (-33.4 to 14)    | -14.1 (-36.6 to 10.7)  |
|            | YLLs       | 1182.6 (910 to 1430.8)              | 911.4 (556.6 to 1225.9)   | 1448.1 (1070.9 to 1862.7) | 948.2 (476.4 to 1112.9)   | 728.9 (325 to 930)        | 1166.4 (578 to 1412.1)    | -19.8 (-48.6 to 3.1)    | -20 (-52.1 to 19.3)    | -19.5 (-50 to 11.9)    |
|            | YLDs       | 403.2 (309.1 to 507.2)              | 387.6 (298.4 to 486.5)    | 416.9 (315.3 to 528)      | 422.7 (333.4 to 510.8)    | 410.4 (322 to 498.7)      | 435.4 (340.3 to 538.4)    | 4.8 (-1.3 to 12.9)      | 5.9 (-1.8 to 15.5)     | 4.4 (-3.1 to 13.6)     |
| Kermanshah | Incidence  | 956.8 (829 to 1111.4)               | 936.6 (815.7 to 1084.9)   | 973.7 (829.6 to 1141.5)   | 911.5 (782 to 1070.1)     | 901.1 (782.1 to 1043.7)   | 921.3 (781.4 to 1094.8)   | -4.7 (-9.1 to -0.7)     | -3.8 (-8.5 to 1.3)     | -5.4 (-10.5 to -0.1)   |
|            | Prevalence | 6023.8 (5377.2 to 6727.8)           | 5856 (5242.8 to 6573.6)   | 6154.1 (5429 to 6924.7)   | 5202 (4611.2 to 5872.6)   | 5003.7 (4452.3 to 5666.5) | 5403.4 (4769.5 to 6131.7) | -13.6 (-17.9 to -9.5)   | -14.6 (-19.5 to -9.1)  | -12.2 (-17.5 to -6.5)  |
|            | Deaths     | 50.4 (41.4 to 61.8)                 | 40.9 (29.4 to 56.9)       | 58.6 (46.1 to 75.9)       | 27 (23 to 31.4)           | 21.9 (17.3 to 27.1)       | 32 (26.2 to 38.5)         | -46.3 (-57.8 to -31.8)  | -46.3 (-63.1 to -21)   | -45.5 (-60.4 to -25.3) |
|            | DALYs      | 1338.1 (1144.2 to 1583.6)           | 1130.5 (879 to 1403.4)    | 1508.8 (1222.2 to 1867.1) | 842.8 (729 to 957.8)      | 730.5 (618.8 to 852.5)    | 958.4 (801.9 to 1109.2)   | -37 (-47.5 to -24.7)    | -35.4 (-49 to -16.1)   | -36.5 (-50.2 to -18.8) |
|            | YLLs       | 974.3 (796.9 to 1202.8)             | 769.2 (539.4 to 1035.4)   | 1144.2 (885 to 1491.6)    | 491 (416.1 to 573.2)      | 382.9 (303.2 to 478.4)    | 601.3 (488.6 to 730.7)    | -49.6 (-60.7 to -34.1)  | -50.2 (-64.9 to -23.4) | -47.5 (-62.3 to -26.7) |
|            | YLDs       | 363.8 (279.2 to 456.8)              | 361.3 (277.4 to 457.8)    | 364.5 (277.3 to 461.4)    | 351.8 (274.1 to 440.1)    | 347.6 (272.8 to 431.7)    | 357.1 (273.6 to 446.7)    | -3.3 (-8.6 to 2.7)      | -3.8 (-10.1 to 3.4)    | -2 (-8.4 to 5.4)       |

| Province          | Measure    | Age-standardized rate (per 100,000) |                           |                           |                           |                           |                           | % Change (1990 to 2019) |                        |                        |
|-------------------|------------|-------------------------------------|---------------------------|---------------------------|---------------------------|---------------------------|---------------------------|-------------------------|------------------------|------------------------|
|                   |            | 1990                                |                           |                           | 2019                      |                           |                           | Both                    | Female                 | Male                   |
|                   |            | Both                                | Female                    | Male                      | Both                      | Female                    | Male                      |                         |                        |                        |
| Khorasan-e-Razavi | Incidence  | 1008.1 (879 to 1171.3)              | 996.9 (866.5 to 1163.6)   | 1017 (869.6 to 1196.7)    | 987 (860.4 to 1148.3)     | 971 (847 to 1133.3)       | 1001.6 (865.7 to 1165.5)  | -2.1 (-6 to 2.3)        | -2.6 (-7.6 to 2.6)     | -1.5 (-6.7 to 4.2)     |
|                   | Prevalence | 6307.5 (5668.3 to 7101.7)           | 6343.3 (5654.8 to 7145.2) | 6266.2 (5578.7 to 7056)   | 5726.8 (5134.7 to 6410.2) | 5531.8 (4949.5 to 6223)   | 5920.5 (5286.6 to 6706)   | -9.2 (-13.6 to -4.9)    | -12.8 (-17.9 to -7.5)  | -5.5 (-10.8 to 0.2)    |
|                   | Deaths     | 59.4 (47.9 to 71.2)                 | 52.8 (33.9 to 69.8)       | 65.8 (51.5 to 84.2)       | 43.1 (29.3 to 50.3)       | 38.3 (19.6 to 48.3)       | 48 (36.1 to 57.5)         | -27.5 (-46.9 to -8.9)   | -27.6 (-52.4 to 14.3)  | -27 (-48.5 to -2.2)    |
|                   | DALYs      | 1476.1 (1234 to 1708.8)             | 1355.6 (1000.1 to 1658.6) | 1584.5 (1279.4 to 1946.1) | 1098.9 (860.2 to 1257.7)  | 985.8 (707.7 to 1160.9)   | 1215.5 (960.9 to 1421.5)  | -25.6 (-39.5 to -10.8)  | -27.3 (-43 to -1.8)    | -23.3 (-42.1 to -3)    |
|                   | YLLs       | 1108.7 (904.2 to 1318.9)            | 977.4 (626.1 to 1274.5)   | 1228.2 (948.2 to 1597.1)  | 715.6 (492.4 to 838.9)    | 605.1 (327.8 to 757.5)    | 829.5 (601.1 to 1001.4)   | -35.5 (-54.1 to -17.1)  | -38.1 (-58.5 to -3.5)  | -32.5 (-54.1 to -7.4)  |
|                   | YLDs       | 367.3 (280.4 to 462.1)              | 378.2 (290.6 to 474.5)    | 356.3 (268.4 to 455.4)    | 383.3 (300.4 to 469.4)    | 380.7 (301.3 to 466.4)    | 386 (296.8 to 480.4)      | 4.3 (-1.9 to 12)        | 0.7 (-6.2 to 9.1)      | 8.3 (0.8 to 18)        |
| Khuzestan         | Incidence  | 859.2 (736.4 to 1012.8)             | 828 (715.5 to 972.2)      | 889.9 (752.6 to 1049.2)   | 862.1 (736.3 to 1014.9)   | 833.4 (716 to 977.7)      | 889.9 (750.9 to 1063)     | 0.3 (-3.5 to 4.6)       | 0.6 (-3.6 to 5.5)      | 0 (-5.1 to 5.8)        |
|                   | Prevalence | 5056.9 (4455.1 to 5717.3)           | 4844.5 (4270.7 to 5539.5) | 5267.7 (4619.3 to 6001)   | 4674.5 (4095.4 to 5357.4) | 4390.5 (3830.6 to 5072.2) | 4953.4 (4349.4 to 5687.5) | -7.6 (-11.5 to -3.2)    | -9.4 (-14.5 to -3.7)   | -6 (-11.1 to -0.5)     |
|                   | Deaths     | 35.1 (28.2 to 44.6)                 | 29.3 (20.8 to 42.5)       | 41.7 (31.9 to 56.6)       | 20.4 (17.6 to 24.9)       | 16.5 (13.2 to 21.6)       | 24.3 (20 to 31.2)         | -41.9 (-56.9 to -24.5)  | -43.7 (-63.7 to -14.1) | -41.5 (-59.7 to -18.2) |
|                   | DALYs      | 960.4 (804.5 to 1155.2)             | 837.7 (652.1 to 1056.3)   | 1082.5 (873.3 to 1388.6)  | 674 (589.6 to 772.6)      | 586 (497.7 to 695.4)      | 763 (653.7 to 897.3)      | -29.8 (-42.2 to -17.2)  | -30.1 (-46 to -10)     | -29.5 (-45.3 to -11.9) |
|                   | YLLs       | 661 (528.1 to 832.7)                | 542.6 (382 to 759.5)      | 779 (584 to 1072.1)       | 364.7 (316.5 to 439)      | 286.6 (229.3 to 372.9)    | 443.9 (362.7 to 555.7)    | -44.8 (-58.4 to -28.6)  | -47.2 (-64.6 to -18.4) | -43 (-59.9 to -20.4)   |
|                   | YLDs       | 299.4 (228.2 to 381.1)              | 295.1 (225.9 to 373.6)    | 303.5 (228.3 to 389.7)    | 309.2 (240.4 to 387.7)    | 299.4 (233 to 375.9)      | 319.1 (245.2 to 407.2)    | 3.3 (-2 to 9.6)         | 1.5 (-5.3 to 9.1)      | 5.2 (-1.6 to 12.9)     |



| Province                   | Measure    | Age-standardized rate (per 100,000) |                            |                              |                              |                            |                              | % Change (1990 to 2019) |                        |                        |
|----------------------------|------------|-------------------------------------|----------------------------|------------------------------|------------------------------|----------------------------|------------------------------|-------------------------|------------------------|------------------------|
|                            |            | 1990                                |                            |                              | 2019                         |                            |                              | Both                    | Female                 | Male                   |
|                            |            | Both                                | Female                     | Male                         | Both                         | Female                     | Male                         |                         |                        |                        |
| Kohgiluyeh and Boyer-Ahmad | Incidence  | 868.1<br>(741.1 to 1019.2)          | 850.8 (731.6 to 1002.4)    | 887.2<br>(749.6 to 1035.7)   | 869.5 (741.2 to 1027.4)      | 856.4 (733.8 to 1011.3)    | 882 (740.4 to 1045.5)        | 0.2 (-3.6 to 4.5)       | 0.7 (-4.3 to 5.6)      | -0.6 (-5.5 to 4.8)     |
|                            | Prevalence | 4951.5<br>(4359.7 to 5681.1)        | 4820.5<br>(4231.7 to 5557) | 5092.5<br>(4455 to 5823.3)   | 4517.1<br>(3954.1 to 5201.6) | 4336.3<br>(3794.8 to 4972) | 4683.1<br>(4042.2 to 5415.1) | -8.8 (-13.3 to -4.1)    | -10 (-15.4 to -4.2)    | -8 (-13.6 to -1.6)     |
|                            | Deaths     | 30.1 (22.2 to 47)                   | 26 (16.3 to 47.2)          | 34.4 (24.9 to 52.6)          | 15.9 (12.4 to 25.7)          | 13.2 (9.2 to 25.3)         | 18.2 (13.7 to 27.9)          | -47 (-63 to -29.4)      | -49.2 (-69.6 to -16.7) | -47 (-65.3 to -23.4)   |
|                            | DALYs      | 830 (671.4 to 1151.5)               | 733.2 (538.3 to 1130.5)    | 920.2<br>(724.4 to 1254)     | 558.5 (464.9 to 716.1)       | 497.7 (398.9 to 713.4)     | 613.3 (505.7 to 758.1)       | -32.7 (-45.7 to -19.3)  | -32.1 (-49 to -10)     | -33.4 (-50.1 to -15.5) |
|                            | YLLs       | 559 (418 to 872.3)                  | 467.8 (295.6 to 867.8)     | 643.4<br>(462.1 to 989.7)    | 277.3 (216.7 to 435.4)       | 223.8 (155 to 436)         | 325.5 (244.8 to 479.8)       | -50.4 (-64 to -33.6)    | -52.2 (-69.8 to -21.1) | -49.4 (-66.8 to -26.3) |
|                            | YLDs       | 271 (202.2 to 352.6)                | 265.4 (198.5 to 348.1)     | 276.8<br>(204.1 to 362.6)    | 281.2 (216.1 to 357.8)       | 273.9 (209.5 to 351.8)     | 287.8 (219 to 367.5)         | 3.8 (-3 to 10.9)        | 3.2 (-4.4 to 12.1)     | 4 (-3.6 to 12.8)       |
| Kurdistan                  | Incidence  | 930.6<br>(802.5 to 1087.3)          | 920.1 (796.7 to 1076.1)    | 937.6<br>(799.4 to 1104.4)   | 896.9 (767.6 to 1053.3)      | 883.9 (766.4 to 1035.1)    | 909.8 (773.4 to 1071.9)      | -3.6 (-8 to 0.5)        | -3.9 (-8.6 to 0.7)     | -3 (-8.1 to 2.6)       |
|                            | Prevalence | 5506.9<br>(4887.8 to 6221.6)        | 5443<br>(4831.7 to 6170.4) | 5541<br>(4892.1 to 6294.1)   | 4869.2<br>(4284.6 to 5565)   | 4677<br>(4114.5 to 5342)   | 5062.3<br>(4421.1 to 5794.7) | -11.6 (-16.3 to -6.7)   | -14.1 (-19.2 to -8.6)  | -8.6 (-14.1 to -2.8)   |
|                            | Deaths     | 44.5 (36.3 to 59.3)                 | 34.1 (24.1 to 55.9)        | 53.7 (42 to 70.9)            | 24.5 (20.8 to 29.5)          | 20.4 (16.3 to 28.3)        | 28.6 (23 to 34.4)            | -44.9 (-56.4 to -31.6)  | -40.1 (-59.6 to -13)   | -46.8 (-61.1 to -28.3) |
|                            | DALYs      | 1168.5<br>(986.6 to 1473.1)         | 991.9 (779.5 to 1399.2)    | 1312.5<br>(1068.1 to 1660.1) | 743.8 (649.7 to 856.5)       | 651 (550.5 to 812.9)       | 837.5 (709.6 to 979.8)       | -36.3 (-46.6 to -25.4)  | -34.4 (-48.1 to -16.4) | -36.2 (-50.8 to -19.7) |
|                            | YLLs       | 855.9<br>(692.9 to 1150.1)          | 678.4 (486.3 to 1071.6)    | 1002.4<br>(771.8 to 1357.2)  | 429.2 (368.8 to 517)         | 343.1 (277 to 485)         | 515.6 (413.2 to 625.1)       | -49.9 (-60.1 to -37)    | -49.4 (-63 to -26.4)   | -48.6 (-63.3 to -28.7) |
|                            | YLDs       | 312.6<br>(238.4 to 405.6)           | 313.4 (239.5 to 404.2)     | 310.1<br>(232.3 to 402.8)    | 314.6 (243.9 to 395.7)       | 307.9 (239.4 to 382.4)     | 321.9 (246.6 to 407)         | 0.7 (-5.1 to 7.2)       | -1.8 (-8.8 to 6.5)     | 3.8 (-3.5 to 12.2)     |

| Province | Measure    | Age-standardized rate (per 100,000) |                              |                              |                              |                              |                              | % Change (1990 to 2019) |                        |                        |
|----------|------------|-------------------------------------|------------------------------|------------------------------|------------------------------|------------------------------|------------------------------|-------------------------|------------------------|------------------------|
|          |            | 1990                                |                              |                              | 2019                         |                              |                              | Both                    | Female                 | Male                   |
|          |            | Both                                | Female                       | Male                         | Both                         | Female                       | Male                         |                         |                        |                        |
| Lorestan | Incidence  | 853.5<br>(731.5 to 1006.8)          | 843.1 (728.7 to 988)         | 862.7<br>(725.7 to 1024.3)   | 877.4 (748.4 to 1039.4)      | 871.3 (751 to 1015.4)        | 881.7 (744 to 1050.6)        | 2.8 (-1 to 6.7)         | 3.4 (-1.2 to 8.1)      | 2.2 (-3 to 7.2)        |
|          | Prevalence | 4936.6<br>(4348.9 to 5584)          | 4865.6<br>(4297.4 to 5551.8) | 4994.9<br>(4398.4 to 5710.9) | 4739.8<br>(4144.5 to 5442.5) | 4597.1<br>(4039.7 to 5289.6) | 4880.2 (4212 to 5651.2)      | -4 (-8.4 to 0.8)        | -5.5 (-10.9 to 0.3)    | -2.3 (-7.7 to 3.9)     |
|          | Deaths     | 31.3 (24.5 to 51.2)                 | 25.8 (17.4 to 49.2)          | 36.5 (27.3 to 64.7)          | 19.5 (15.8 to 30.7)          | 13.2 (9.6 to 22.6)           | 26.1 (21 to 41.5)            | -37.7 (-52.9 to -19.9)  | -49 (-67.1 to -18.8)   | -28.6 (-50.6 to -0.6)  |
|          | DALYs      | 880.6 (718 to 1255.2)               | 774.1 (584.4 to 1215.7)      | 972.9<br>(775.4 to 1468.6)   | 639.6 (538.4 to 808.5)       | 526.7 (427.9 to 708.5)       | 758.2 (633.6 to 993.3)       | -27.4 (-40.8 to -14.6)  | -32 (-46.6 to -11.1)   | -22.1 (-40.5 to -1)    |
|          | YLLs       | 598.2<br>(468.6 to 985)             | 491.2 (327.6 to 901.6)       | 691.7 (514 to 1205)          | 338.1 (273.5 to 519.8)       | 228.9 (166.1 to 405.5)       | 452.8 (361 to 700.1)         | -43.5 (-57.3 to -26.5)  | -53.4 (-68.7 to -24.6) | -34.5 (-54.9 to -6.5)  |
|          | YLDs       | 282.4<br>(213.5 to 363.4)           | 282.9 (214.4 to 362.2)       | 281.2<br>(209.6 to 365.5)    | 301.5 (233.7 to 379.3)       | 297.8 (230.3 to 374.7)       | 305.4 (230.8 to 388.8)       | 6.8 (1 to 13.4)         | 5.3 (-1.9 to 13)       | 8.6 (1.1 to 16.9)      |
| Markazi  | Incidence  | 977.6<br>(844.8 to 1138.2)          | 939.6 (818.5 to 1083.6)      | 1012.4<br>(861.2 to 1177.5)  | 918.1 (790.5 to 1078.4)      | 896.5 (779.1 to 1043.9)      | 938.9 (799.8 to 1111.7)      | -6.1 (-10.5 to -1.1)    | -4.6 (-9.5 to 0.6)     | -7.3 (-12.4 to -1.7)   |
|          | Prevalence | 6050.3<br>(5365.4 to 6850.1)        | 5742.2<br>(5068 to 6485.8)   | 6338.3<br>(5587.5 to 7202)   | 5158 (4557.6 to 5842.7)      | 4820.2<br>(4245.2 to 5510.8) | 5498.2<br>(4830.4 to 6271.8) | -14.7 (-19.1 to -10.2)  | -16.1 (-21.4 to -9.9)  | -13.3 (-18.6 to -7.7)  |
|          | Deaths     | 48.5 (39.3 to 60)                   | 39.6 (27.9 to 54.3)          | 57.4 (44.3 to 74.1)          | 25.7 (21.5 to 30.4)          | 20.7 (16.3 to 26.8)          | 30.8 (24.5 to 37.5)          | -46.9 (-57.6 to -33.6)  | -47.5 (-62.3 to -21.9) | -46.4 (-60.1 to -27.3) |
|          | DALYs      | 1244<br>(1058.8 to 1466.1)          | 1044.8<br>(818.2 to 1299.6)  | 1434.6<br>(1157.4 to 1771.5) | 783.5 (683.6 to 898.9)       | 656.9 (558.3 to 784.7)       | 913.3 (770.3 to 1063.4)      | -37 (-46.6 to -25.9)    | -37.1 (-49.5 to -18.3) | -36.3 (-49.3 to -19.5) |
|          | YLLs       | 900.5<br>(731.6 to 1108.9)          | 711.6 (502.3 to 954.4)       | 1082 (822.3 to 1398.1)       | 447.7 (374.9 to 533.2)       | 337.7 (267.5 to 447.1)       | 560.2 (443.6 to 680.8)       | -50.3 (-60.6 to -37.1)  | -52.5 (-65.4 to -27)   | -48.2 (-62.2 to -28.2) |
|          | YLDs       | 343.6<br>(260.8 to 442.1)           | 333.2 (255.3 to 429.1)       | 352.6<br>(261.9 to 455.4)    | 335.8 (262.4 to 415.8)       | 319.3 (250.7 to 396.7)       | 353.1 (271.4 to 445.3)       | -2.3 (-8.4 to 4.8)      | -4.2 (-10.9 to 4)      | 0.1 (-7.2 to 8.9)      |

| Province       | Measure    | Age-standardized rate (per 100,000) |                              |                              |                            |                            |                              | % Change (1990 to 2019) |                       |                        |
|----------------|------------|-------------------------------------|------------------------------|------------------------------|----------------------------|----------------------------|------------------------------|-------------------------|-----------------------|------------------------|
|                |            | 1990                                |                              |                              | 2019                       |                            |                              |                         |                       |                        |
|                |            | Both                                | Female                       | Male                         | Both                       | Female                     | Male                         | Both                    | Female                | Male                   |
| Mazandaran     | Incidence  | 915.7<br>(784.2 to 1072.1)          | 891.4 (772.6 to 1046.3)      | 939.3<br>(791.5 to 1099.9)   | 911.8 (775.8 to 1073.4)    | 897.3 (773.6 to 1056.9)    | 925.6 (780.6 to 1098.5)      | -0.4 (-4.4 to 3.9)      | 0.7 (-4.1 to 5.5)     | -1.5 (-6.5 to 4)       |
|                | Prevalence | 5379.9<br>(4731.1 to 6140.6)        | 5252.1<br>(4607.6 to 6002.9) | 5515.1<br>(4844.2 to 6286.1) | 4904.5<br>(4294.2 to 5601) | 4741.9<br>(4156 to 5467.3) | 5067 (4413.5 to 5768.9)      | -8.8 (-13.2 to -4.3)    | -9.7 (-15.1 to -4)    | -8.1 (-13 to -2)       |
|                | Deaths     | 28.1 (21.9 to 38.3)                 | 23.5 (15.8 to 36.3)          | 33.8 (25.5 to 49.6)          | 19 (16.1 to 23.5)          | 14.8 (11.6 to 20)          | 23.4 (19.3 to 29.3)          | -32.2 (-50.5 to -10.2)  | -37.2 (-59.3 to 1.1)  | -30.6 (-52.3 to -5.1)  |
|                | DALYs      | 806.2 (671 to 1003.5)               | 723.4 (556.4 to 970.3)       | 896.7<br>(728.3 to 1186)     | 631.4 (548.1 to 737.6)     | 550.9 (463.5 to 671.5)     | 713.7 (605.6 to 843.4)       | -21.7 (-36.5 to -7.4)   | -23.8 (-39.8 to -1.1) | -20.4 (-38.2 to -2.3)  |
|                | YLLs       | 503.8<br>(396.6 to 686.5)           | 421.4 (277 to 646)           | 594.1<br>(447.3 to 871.8)    | 323.6 (275.3 to 397.2)     | 247.1 (193.7 to 340.7)     | 401.8 (324.7 to 498.9)       | -35.8 (-52.6 to -14.2)  | -41.4 (-60.8 to -2.5) | -32.4 (-54 to -5.2)    |
|                | YLDs       | 302.4<br>(229.2 to 389.2)           | 302 (231.8 to 384.3)         | 302.7<br>(225.7 to 390.8)    | 307.8 (236.8 to 384.7)     | 303.8 (235.8 to 380.6)     | 311.9 (236.1 to 397.1)       | 1.8 (-4.2 to 8.5)       | 0.6 (-6.3 to 8.7)     | 3.1 (-4.3 to 11)       |
| North Khorasan | Incidence  | 978.7<br>(843.6 to 1133.4)          | 973.2 (845.1 to 1127.3)      | 982.7<br>(839.6 to 1139.3)   | 943.8 (812.5 to 1099.4)    | 944.8 (819.8 to 1095.2)    | 943.7 (806 to 1100.7)        | -3.6 (-7.9 to 1.7)      | -2.9 (-8 to 2.8)      | -4 (-9.1 to 1.8)       |
|                | Prevalence | 6011.3<br>(5346.5 to 6793.6)        | 6022.1<br>(5344.7 to 6839.1) | 5994.1<br>(5327.9 to 6782.9) | 5392.7 (4802 to 6069.4)    | 5299<br>(4735.9 to 5956)   | 5494.2<br>(4857.6 to 6214.7) | -10.3 (-14.6 to -5.9)   | -12 (-17.2 to -6.7)   | -8.3 (-14 to -2.3)     |
|                | Deaths     | 52.1 (42.6 to 62.3)                 | 46.7 (31.1 to 62.8)          | 57.2 (44 to 75)              | 32.5 (27 to 37.1)          | 30.7 (20.7 to 38.3)        | 34.6 (28.6 to 40.7)          | -37.6 (-50.8 to -21.3)  | -34.3 (-54.4 to 7.3)  | -39.4 (-56.4 to -18.5) |
|                | DALYs      | 1373.4<br>(1168.3 to 1590.2)        | 1270.7<br>(921.4 to 1564.2)  | 1464.1<br>(1190 to 1815)     | 931.8 (809 to 1047.8)      | 876.9 (706.9 to 1017.1)    | 994 (847.6 to 1150.8)        | -32.2 (-42.7 to -19.5)  | -31 (-44.7 to -3.4)   | -32.1 (-47.6 to -15.1) |
|                | YLLs       | 1037.1<br>(849.6 to 1228.4)         | 927.6 (588.2 to 1194.7)      | 1135.1<br>(874.2 to 1484.9)  | 581.7 (485.7 to 664.5)     | 523.7 (366.5 to 648.5)     | 645.3 (534.1 to 759.7)       | -43.9 (-55.8 to -29.5)  | -43.5 (-59.3 to -7.2) | -43.1 (-59.3 to -22.2) |
|                | YLDs       | 336.3<br>(253.5 to 430.6)           | 343.2 (261.2 to 440.6)       | 329 (245.4 to 429.4)         | 350.2 (271.5 to 434.8)     | 353.2 (275.4 to 433.9)     | 348.7 (265.6 to 441.7)       | 4.1 (-2.5 to 11.8)      | 2.9 (-4.3 to 11.8)    | 6 (-2.4 to 15.5)       |

| Province | Measure    | Age-standardized rate (per 100,000) |                             |                              |                              |                              |                              | % Change (1990 to 2019) |                        |                        |
|----------|------------|-------------------------------------|-----------------------------|------------------------------|------------------------------|------------------------------|------------------------------|-------------------------|------------------------|------------------------|
|          |            | 1990                                |                             |                              | 2019                         |                              |                              | Both                    | Female                 | Male                   |
|          |            | Both                                | Female                      | Male                         | Both                         | Female                       | Male                         |                         |                        |                        |
| Qazvin   | Incidence  | 942.2<br>(812.3 to 1105.7)          | 934.6 (815.2 to 1084.9)     | 950.3<br>(810.7 to 1117.3)   | 919 (789.1 to 1078.7)        | 903.7 (780.4 to 1060.3)      | 931.7 (792 to 1108.5)        | -2.5 (-6.7 to 1.5)      | -3.3 (-9.1 to 2.1)     | -2 (-6.8 to 2.6)       |
|          | Prevalence | 5773<br>(5140.9 to 6515.4)          | 5788<br>(5156.9 to 6540.4)  | 5761.9<br>(5088.3 to 6523.3) | 5070 (4489.2 to 5752.3)      | 4837.1<br>(4259.2 to 5527.9) | 5298.5<br>(4662.5 to 6045.4) | -12.2 (-16.4 to -7.6)   | -16.4 (-21.6 to -10.6) | -8 (-13.7 to -2.6)     |
|          | Deaths     | 36.4 (28.7 to 49.6)                 | 31.9 (21.7 to 47.9)         | 41.7 (31.4 to 59.1)          | 26.3 (22.3 to 30.8)          | 17.3 (13.3 to 22)            | 36.5 (30.5 to 42.9)          | -27.7 (-47.2 to -4.2)   | -45.7 (-65.2 to -14.5) | -12.5 (-40.7 to 19.3)  |
|          | DALYs      | 1019.2<br>(847.4 to 1242.8)         | 938.7 (726.7 to 1206)       | 1101.2 (866 to 1408.7)       | 774 (674.6 to 888.7)         | 605.2 (511.5 to 718)         | 954.9 (827.9 to 1100.3)      | -24.1 (-37.9 to -8.7)   | -35.5 (-49.1 to -15.1) | -13.3 (-34 to 10)      |
|          | YLLs       | 684.2<br>(544.7 to 898.9)           | 597.4 (399.2 to 846.6)      | 772.5<br>(575.4 to 1065.7)   | 444.2 (378.7 to 522.2)       | 285.3 (222.6 to 374.3)       | 615.6 (509.9 to 728.4)       | -35.1 (-51.5 to -14.2)  | -52.2 (-68.2 to -23.6) | -20.3 (-46 to 13.3)    |
|          | YLDs       | 335 (254 to 425.7)                  | 341.3 (260.7 to 433.4)      | 328.8<br>(246.2 to 426.6)    | 329.8 (255.9 to 410.3)       | 319.9 (247.2 to 398.6)       | 339.3 (259.6 to 428.1)       | -1.5 (-7.3 to 4.6)      | -6.3 (-13.3 to 1)      | 3.2 (-3.7 to 11.1)     |
| Qom      | Incidence  | 959.8<br>(830.7 to 1110.7)          | 951.7 (825.3 to 1102.6)     | 968.1<br>(830.2 to 1126.8)   | 939.4 (808.5 to 1098.4)      | 939.3 (809.4 to 1087.9)      | 942.7 (799.8 to 1113.5)      | -2.1 (-6.7 to 2.6)      | -1.3 (-6.5 to 4)       | -2.6 (-8.1 to 3.2)     |
|          | Prevalence | 5964.5<br>(5329.6 to 6680.9)        | 5879.5<br>(5231.4 to 6643)  | 6051.1<br>(5412.5 to 6793.1) | 5131.7<br>(4549.5 to 5816.7) | 4969.1<br>(4390.7 to 5681.8) | 5302.8<br>(4682.1 to 6042.7) | -14 (-18.1 to -9.6)     | -15.5 (-20.9 to -10.2) | -12.4 (-17.1 to -6.8)  |
|          | Deaths     | 54.5 (36.9 to 68.7)                 | 47.5 (27.8 to 67.5)         | 61.3 (43.2 to 82.1)          | 28.5 (22.1 to 32.8)          | 26.1 (17.3 to 32.3)          | 31 (24 to 37.1)              | -47.7 (-59 to -32.5)    | -45 (-62.7 to -13.6)   | -49.5 (-63.6 to -29.6) |
|          | DALYs      | 1347.9 (990 to 1614.2)              | 1180.4<br>(819.7 to 1500.8) | 1505.2<br>(1089.8 to 1925.1) | 808.3 (690.2 to 921.5)       | 731.3 (596 to 858.2)         | 886.3 (738.7 to 1027.1)      | -40 (-50 to -26.4)      | -38 (-51.1 to -12.2)   | -41.1 (-55.1 to -23.3) |
|          | YLLs       | 987.4 (654 to 1235.6)               | 821.9 (475.9 to 1131.8)     | 1142.9 (753 to 1543.5)       | 466.5 (365.6 to 537.8)       | 395.9 (269.8 to 490.7)       | 536.5 (406.5 to 646.9)       | -52.8 (-62.9 to -37.1)  | -51.8 (-66.1 to -16)   | -53.1 (-66.8 to -32.3) |
|          | YLDs       | 360.5<br>(276.1 to 451.7)           | 358.4 (276.7 to 452.4)      | 362.3<br>(273.1 to 459.6)    | 341.8 (266.2 to 425.8)       | 335.4 (262.7 to 416.3)       | 349.8 (269.1 to 437.1)       | -5.2 (-10.5 to 0.4)     | -6.4 (-12.6 to 0.4)    | -3.4 (-9.3 to 2.8)     |

| Province               | Measure    | Age-standardized rate (per 100,000) |                           |                           |                           |                           |                           | % Change (1990 to 2019) |                        |                        |
|------------------------|------------|-------------------------------------|---------------------------|---------------------------|---------------------------|---------------------------|---------------------------|-------------------------|------------------------|------------------------|
|                        |            | 1990                                |                           |                           | 2019                      |                           |                           | Both                    | Female                 | Male                   |
|                        |            | Both                                | Female                    | Male                      | Both                      | Female                    | Male                      |                         |                        |                        |
| Semnan                 | Incidence  | 984 (848.9 to 1133.9)               | 953.7 (823.6 to 1098.5)   | 1013.5 (864.6 to 1179.3)  | 938.1 (807 to 1098.4)     | 926.2 (804 to 1073.8)     | 947 (807.3 to 1122.5)     | -4.7 (-8.8 to 0)        | -2.9 (-7.9 to 2.4)     | -6.6 (-11.7 to -0.3)   |
|                        | Prevalence | 6123.1 (5441.5 to 6930.2)           | 5876.3 (5211.3 to 6622.9) | 6378.1 (5653.9 to 7229.5) | 5225.1 (4622.3 to 5917.2) | 5026.3 (4434.6 to 5701.6) | 5415 (4767.3 to 6173.2)   | -14.7 (-19 to -10.3)    | -14.5 (-19.8 to -9)    | -15.1 (-20 to -9.7)    |
|                        | Deaths     | 45.4 (34.8 to 59.6)                 | 35.9 (23.2 to 54.5)       | 57.7 (44.5 to 76.4)       | 29.5 (24.2 to 34.2)       | 20.3 (14.6 to 25.2)       | 40.1 (32.3 to 46.7)       | -35 (-52.1 to -14.2)    | -43.4 (-65.7 to -10.6) | -30.4 (-49.3 to -6.9)  |
|                        | DALYs      | 1183.1 (956.8 to 1419.4)            | 983.9 (738.5 to 1283.9)   | 1401.4 (1108.7 to 1770.9) | 829.6 (702.8 to 951.9)    | 659.9 (548.9 to 773.6)    | 1011.3 (839.6 to 1161.7)  | -29.9 (-42.7 to -14.9)  | -32.9 (-50.8 to -10.5) | -27.8 (-43.6 to -9.4)  |
|                        | YLLs       | 833.5 (637.8 to 1064.9)             | 646 (425.5 to 945)        | 1040.5 (774.1 to 1392)    | 489.9 (405.3 to 564.4)    | 329.1 (245.1 to 412.8)    | 663.7 (536.8 to 774.1)    | -41.2 (-55.9 to -22)    | -49.1 (-67.4 to -17.3) | -36.2 (-54.1 to -11.4) |
|                        | YLDs       | 349.6 (264.6 to 444)                | 337.9 (255.5 to 431.9)    | 360.9 (269.9 to 462.5)    | 339.7 (263.6 to 425.5)    | 330.9 (256.5 to 414.8)    | 347.5 (265.7 to 438.3)    | -2.8 (-8.7 to 3.6)      | -2.1 (-9.2 to 5.7)     | -3.7 (-10.5 to 4.1)    |
| Sistan and Baluchistan | Incidence  | 1111.5 (966.6 to 1296.4)            | 1081.8 (936.3 to 1257.9)  | 1139.3 (980.8 to 1345.3)  | 1015.1 (883.1 to 1176.3)  | 997.7 (868.4 to 1154)     | 1030.5 (885.6 to 1200.8)  | -8.7 (-13.6 to -4)      | -7.8 (-12.6 to -2.1)   | -9.6 (-15.6 to -3.9)   |
|                        | Prevalence | 7107.7 (6351.1 to 8009.7)           | 7037.9 (6274.1 to 7922.5) | 7167.2 (6358.8 to 8145.6) | 6040.5 (5426.6 to 6782.8) | 5826.1 (5225.9 to 6578)   | 6247.8 (5593.7 to 7063.3) | -15 (-18.8 to -10.7)    | -17.2 (-21.9 to -12.1) | -12.8 (-17.9 to -7)    |
|                        | Deaths     | 95.9 (46.2 to 122.8)                | 87.5 (28.4 to 128.7)      | 103.5 (57.1 to 136.1)     | 47.1 (27.9 to 56.6)       | 42.1 (18.1 to 55.3)       | 52 (34.6 to 65.8)         | -50.9 (-62.7 to -33.8)  | -51.9 (-68.7 to -26.1) | -49.7 (-64.6 to -26.6) |
|                        | DALYs      | 2264.1 (1336.5 to 2765.2)           | 2075.1 (974.9 to 2787.8)  | 2414.8 (1411.4 to 3084.4) | 1300.1 (923.2 to 1513.1)  | 1200.2 (750.1 to 1471.9)  | 1400.1 (1024.2 to 1686)   | -42.6 (-53.9 to -21.6)  | -42.2 (-57.8 to -17.4) | -42 (-57.3 to -14.4)   |
|                        | YLLs       | 1858.2 (938.4 to 2346.2)            | 1668.1 (582.2 to 2389.5)  | 2010.6 (1041.4 to 2667.5) | 907.1 (546.4 to 1086.3)   | 811.2 (373.5 to 1073.5)   | 1003.2 (642.3 to 1260.7)  | -51.2 (-62.8 to -28)    | -51.4 (-67.6 to -21.9) | -50.1 (-65.3 to -18.9) |
|                        | YLDs       | 405.9 (305.1 to 520.8)              | 406.9 (310 to 523.8)      | 404.2 (299.9 to 520.1)    | 393 (305.5 to 489.5)      | 388.9 (304.3 to 482.9)    | 396.9 (304 to 501.3)      | -3.2 (-8.7 to 3.4)      | -4.4 (-10.5 to 2.8)    | -1.8 (-8.1 to 5.9)     |

| Province       | Measure    | Age-standardized rate (per 100,000) |                           |                           |                           |                           |                          | % Change (1990 to 2019) |                        |                        |
|----------------|------------|-------------------------------------|---------------------------|---------------------------|---------------------------|---------------------------|--------------------------|-------------------------|------------------------|------------------------|
|                |            | 1990                                |                           |                           | 2019                      |                           |                          |                         |                        |                        |
|                |            | Both                                | Female                    | Male                      | Both                      | Female                    | Male                     | Both                    | Female                 | Male                   |
| South Khorasan | Incidence  | 1089.2 (939 to 1281.4)              | 1029.1 (894.5 to 1193)    | 1143.1 (975.2 to 1355.7)  | 1017.8 (884.3 to 1185.5)  | 981.7 (853.7 to 1134.1)   | 1051.6 (903.1 to 1236.4) | -6.6 (-11.4 to -1.6)    | -4.6 (-9.9 to 1.2)     | -8 (-13.9 to -2.3)     |
|                | Prevalence | 6899.5 (6144.6 to 7837.5)           | 6532.8 (5804 to 7421.3)   | 7239.2 (6386.6 to 8232.3) | 5932.4 (5278.1 to 6705.9) | 5613.2 (4961.6 to 6320.7) | 6243 (5540.2 to 7086.3)  | -14 (-18 to -9.6)       | -14.1 (-18.9 to -8.5)  | -13.8 (-18.7 to -8.2)  |
|                | Deaths     | 70.2 (43.6 to 87.6)                 | 56.6 (27.6 to 77.8)       | 83.8 (52.5 to 110.9)      | 42.9 (25.2 to 50.4)       | 34.2 (16.8 to 43)         | 53.5 (32.8 to 63.8)      | -38.8 (-52.5 to -24.1)  | -39.6 (-58.3 to -7)    | -36.1 (-53.3 to -15.7) |
|                | DALYs      | 1737.3 (1233.7 to 2067.1)           | 1463.1 (893.7 to 1862.6)  | 1992.5 (1386.6 to 2485.8) | 1102.4 (796 to 1256)      | 946.4 (644 to 1114)       | 1274.8 (917.9 to 1487)   | -36.5 (-47 to -25.6)    | -35.3 (-49.5 to -11.1) | -36 (-49.5 to -20.3)   |
|                | YLLs       | 1358.6 (854.1 to 1683.2)            | 1095.6 (536.2 to 1486.9)  | 1603.8 (1002.1 to 2107.1) | 723.8 (412.5 to 844.3)    | 577.1 (290.1 to 719.8)    | 887.3 (522.3 to 1071.8)  | -46.7 (-57.9 to -33.6)  | -47.3 (-62.5 to -16.5) | -44.7 (-59.2 to -26.2) |
|                | YLDs       | 378.7 (283 to 488.9)                | 367.5 (278.1 to 475.3)    | 388.7 (285.9 to 504.5)    | 378.6 (293.1 to 471.7)    | 369.3 (288.9 to 460.3)    | 387.5 (295.1 to 491.4)   | 0 (-6.6 to 7.8)         | 0.5 (-6.6 to 9)        | -0.3 (-8.2 to 9)       |
| Tehran         | Incidence  | 905.2 (777.3 to 1059.1)             | 871.4 (754.1 to 1027)     | 939.6 (800.1 to 1101)     | 925.4 (788.6 to 1085.8)   | 909.7 (783.1 to 1066.5)   | 940 (795.4 to 1107.2)    | 2.2 (-1.7 to 5.8)       | 4.4 (-0.5 to 8.9)      | 0 (-4.8 to 4.5)        |
|                | Prevalence | 4976.6 (4351.8 to 5658.2)           | 4696.9 (4109.3 to 5420.1) | 5264.5 (4577.8 to 6000.2) | 4899.7 (4293.2 to 5649.5) | 4578.6 (3989.1 to 5303.8) | 5213.7 (4557 to 5964.8)  | -1.5 (-5.6 to 2.8)      | -2.5 (-8.3 to 3.3)     | -1 (-6.1 to 4.6)       |
|                | Deaths     | 27.4 (19.8 to 37.9)                 | 25.4 (14.9 to 40.9)       | 29.4 (21.3 to 43.6)       | 14.5 (11.9 to 17.6)       | 13.3 (10.2 to 18.2)       | 15.7 (12.1 to 19.3)      | -47.1 (-62.2 to -26.4)  | -47.5 (-67.8 to -9.9)  | -46.5 (-65.8 to -24.1) |
|                | DALYs      | 761.3 (619.2 to 931.2)              | 690.5 (508.9 to 938.3)    | 828.3 (659.8 to 1083.4)   | 553.2 (470.1 to 644.2)    | 500.8 (413.6 to 616.6)    | 605.7 (504.2 to 709.9)   | -27.3 (-40.3 to -12.7)  | -27.5 (-45 to -4.7)    | -26.9 (-43.6 to -10.5) |
|                | YLLs       | 465.6 (344.8 to 634.1)              | 411.3 (241.8 to 653.4)    | 515.8 (373.1 to 764.5)    | 227 (188.9 to 287.4)      | 194 (150.6 to 289.6)      | 260.1 (202.4 to 320.3)   | -51.3 (-65.1 to -32.3)  | -52.8 (-70.5 to -19.5) | -49.6 (-66.8 to -27.3) |
|                | YLDs       | 295.7 (227 to 375.5)                | 279.3 (213.8 to 354.3)    | 312.5 (235.9 to 401.5)    | 326.2 (254.6 to 404.8)    | 306.8 (238.8 to 379.4)    | 345.6 (264.4 to 436.2)   | 10.3 (3.9 to 17.5)      | 9.9 (1.8 to 18.9)      | 10.6 (3.3 to 19.2)     |

| Province        | Measure    | Age-standardized rate (per 100,000) |                              |                              |                              |                              |                              | % Change (1990 to 2019) |                        |                        |
|-----------------|------------|-------------------------------------|------------------------------|------------------------------|------------------------------|------------------------------|------------------------------|-------------------------|------------------------|------------------------|
|                 |            | 1990                                |                              |                              | 2019                         |                              |                              | Both                    | Female                 | Male                   |
|                 |            | Both                                | Female                       | Male                         | Both                         | Female                       | Male                         |                         |                        |                        |
| West Azarbaijan | Incidence  | 1020.7<br>(890.1 to 1182.6)         | 995.7 (868.3 to 1158.2)      | 1043.4<br>(898.6 to 1209.8)  | 951.1 (822.4 to 1107.1)      | 931.2 (813.5 to 1084.3)      | 970.3 (828.5 to 1136.3)      | -6.8 (-11.4 to -2.5)    | -6.5 (-11.5 to -1.4)   | -7 (-12.4 to -1.6)     |
|                 | Prevalence | 6300.1<br>(5591.2 to 7071.7)        | 6167.8<br>(5493.7 to 6919.7) | 6415.5<br>(5664.1 to 7262.3) | 5351.7<br>(4757.2 to 6084)   | 5124.8<br>(4548.9 to 5826.7) | 5583 (4942.4 to 6394.3)      | -15.1 (-19.3 to -10.3)  | -16.9 (-21.9 to -11.4) | -13 (-18.2 to -7)      |
|                 | Deaths     | 67.5 (52.8 to 81.1)                 | 56.6 (36.1 to 80.2)          | 78.6 (60.7 to 99.2)          | 38.5 (33 to 43.7)            | 31.6 (24.5 to 38.3)          | 46.1 (38.5 to 53.6)          | -43 (-54.8 to -29)      | -44.2 (-64.2 to -18.4) | -41.4 (-56.1 to -23.4) |
|                 | DALYs      | 1542.3<br>(1297.2 to 1791.7)        | 1335.2<br>(1011.3 to 1710.1) | 1733.5<br>(1393.4 to 2100.5) | 952 (838.4 to 1066.1)        | 819.4 (695.5 to 951.8)       | 1095.1<br>(943.5 to 1255.1)  | -38.3 (-48 to -27.7)    | -38.6 (-53.7 to -20.1) | -36.8 (-49.5 to -21.7) |
|                 | YLLs       | 1183.5<br>(955.5 to 1400.8)         | 978.9 (666.6 to 1338.9)      | 1373.2<br>(1068.3 to 1719.4) | 606.7 (523.8 to 684.1)       | 483 (391.4 to 582)           | 740.1 (618.2 to 875.5)       | -48.7 (-59.1 to -36.9)  | -50.7 (-66.2 to -27.7) | -46.1 (-59.9 to -28.2) |
|                 | YLDs       | 358.8<br>(270.5 to 459.5)           | 356.4 (270.4 to 456.9)       | 360.2<br>(266.3 to 465.5)    | 345.4 (266.7 to 430)         | 336.4 (260.1 to 420.9)       | 355 (270.8 to 445.2)         | -3.8 (-9.7 to 2.6)      | -5.6 (-12.4 to 1)      | -1.5 (-8.3 to 7.4)     |
| Yazd            | Incidence  | 961.4<br>(832.8 to 1122.1)          | 915.6 (793.7 to 1065.1)      | 1014.7<br>(873.6 to 1185.7)  | 931 (801.4 to 1090.8)        | 904.3 (779.5 to 1056.6)      | 955.8 (817 to 1125.1)        | -3.2 (-7.8 to 0.8)      | -1.2 (-6.6 to 3.8)     | -5.8 (-11.3 to -0.8)   |
|                 | Prevalence | 5853 (5190 to 6638.3)               | 5536<br>(4898.3 to 6282.1)   | 6244<br>(5549.4 to 7042.2)   | 5173.8<br>(4592.5 to 5892.8) | 4839.1<br>(4275.5 to 5500.8) | 5494.1<br>(4833.4 to 6232.7) | -11.6 (-15.9 to -7.3)   | -12.6 (-18 to -7.2)    | -12 (-17.2 to -6.1)    |
|                 | Deaths     | 49.6 (38.3 to 63.2)                 | 37.1 (25.5 to 56.3)          | 67.4 (50.4 to 89.2)          | 34.6 (26.7 to 40.7)          | 24.4 (17.5 to 30.4)          | 46.9 (33.8 to 57)            | -30.1 (-46.6 to -8.1)   | -34.2 (-57.8 to 1)     | -30.5 (-50 to -5.7)    |
|                 | DALYs      | 1235.5<br>(1015.7 to 1481.8)        | 985.7 (765.7 to 1300)        | 1537.9<br>(1190.9 to 1908.3) | 891.8 (751.3 to 1025.7)      | 703.8 (584.6 to 833.9)       | 1086.7<br>(879.9 to 1287.4)  | -27.8 (-40.5 to -11.8)  | -28.6 (-45 to -5.3)    | -29.3 (-45.9 to -9.7)  |
|                 | YLLs       | 892.1<br>(692.8 to 1113.1)          | 656 (457.8 to 952.9)         | 1176.6<br>(860.3 to 1554.1)  | 548.9 (432.8 to 644.8)       | 378.2 (280.5 to 479.8)       | 727.9 (524.4 to 895.4)       | -38.5 (-52.7 to -17.6)  | -42.4 (-60.5 to -8.9)  | -38.1 (-56.9 to -13.2) |
|                 | YLDs       | 343.4<br>(260.8 to 433.4)           | 329.6 (251.2 to 417.5)       | 361.3<br>(270.7 to 461.8)    | 342.9 (266.8 to 427.7)       | 325.7 (254.8 to 401)         | 358.9 (273.2 to 450)         | -0.1 (-6.3 to 6.7)      | -1.2 (-8.4 to 7.2)     | -0.7 (-7.8 to 7.2)     |

| Province | Measure    | Age-standardized rate (per 100,000) |                           |                           |                           |                           |                         | % Change (1990 to 2019) |                        |                      |
|----------|------------|-------------------------------------|---------------------------|---------------------------|---------------------------|---------------------------|-------------------------|-------------------------|------------------------|----------------------|
|          |            | 1990                                |                           |                           | 2019                      |                           |                         | Both                    | Female                 | Male                 |
|          |            | Both                                | Female                    | Male                      | Both                      | Female                    | Male                    |                         |                        |                      |
| Zanjan   | Incidence  | 941 (811.3 to 1095.2)               | 917.2 (793.2 to 1070)     | 963.2 (818.9 to 1121.1)   | 917.3 (787.7 to 1076.6)   | 905.1 (779.9 to 1057.2)   | 927.2 (788.2 to 1098.6) | -2.5 (-6.5 to 1.9)      | -1.3 (-6.1 to 4.3)     | -3.7 (-9 to 1.5)     |
|          | Prevalence | 5725.5 (5087 to 6466.2)             | 5566.4 (4947.6 to 6274.3) | 5867.3 (5200.4 to 6714.7) | 5101.1 (4512.8 to 5789.8) | 4887.6 (4334.7 to 5553.7) | 5314 (4681.8 to 6062.8) | -10.9 (-15.2 to -6.3)   | -12.2 (-17.2 to -6.5)  | -9.4 (-14.9 to -3.6) |
|          | Deaths     | 41.3 (32.9 to 53.5)                 | 34.7 (24 to 55)           | 49.2 (37.9 to 64.1)       | 29.3 (24.9 to 33.5)       | 21.7 (16.4 to 26.8)       | 37.9 (32 to 44.2)       | -29 (-45.4 to -9.7)     | -37.5 (-60.9 to -10.4) | -23.1 (-42.6 to 2.1) |
|          | DALYs      | 1129.7 (946.8 to 1357.7)            | 994.3 (784.3 to 1336.8)   | 1262.3 (1017.3 to 1555.9) | 834.9 (731.6 to 940.5)    | 698 (587.9 to 811.3)      | 983.3 (854.2 to 1121.2) | -26.1 (-38.2 to -13.2)  | -29.8 (-45.9 to -11.8) | -22.1 (-38 to -3.3)  |
|          | YLLs       | 789.7 (635.2 to 1005.3)             | 652.8 (456.4 to 985)      | 925.8 (702.8 to 1218.1)   | 494.5 (421.3 to 564.9)    | 362.4 (270.3 to 460.3)    | 638.5 (537.6 to 746.8)  | -37.4 (-51.1 to -20)    | -44.5 (-62.3 to -19.6) | -31 (-49.2 to -6.7)  |
|          | YLDs       | 339.9 (259.1 to 432.4)              | 341.5 (263.6 to 432)      | 336.5 (251.8 to 434.2)    | 340.4 (264.5 to 419.4)    | 335.6 (259.9 to 414.2)    | 344.8 (263.6 to 428.1)  | 0.1 (-5.6 to 6.4)       | -1.7 (-8 to 5.1)       | 2.5 (-5.1 to 11.1)   |

Data in parentheses are 95% Uncertainty Intervals (95% UIs); DALYs= Disability-Adjusted Life Years; YLLs= Years of Life Lost; YLDs= Years Lived with Disability
