# Supplementary material for: National, subnational and risk attributed burden of chronic respiratory diseases in Iran from 1990 to 2019
Source: Springer Nature journal article supplement (doi:10.1186/s12931-023-02353-1), 2023-03-11
Supplement: MOESM7 [file 24613202]

| Risk factor                          | Measure | Age (metric)                        | Year                      |                          |                           |                            |                           |                           | % Change (1990 to 2019) |                        |                        |
|--------------------------------------|---------|-------------------------------------|---------------------------|--------------------------|---------------------------|----------------------------|---------------------------|---------------------------|-------------------------|------------------------|------------------------|
|                                      |         |                                     | 1990                      |                          |                           | 2019                       |                           |                           | Both                    | Female                 | Male                   |
|                                      |         |                                     | Both                      | Female                   | Male                      | Both                       | Female                    | Male                      |                         |                        |                        |
| Ambient particulate matter pollution | Deaths  | All ages (number)                   | 893 (659 to 1,181)        | 337 (218 to 497)         | 556 (405 to 749)          | 2,954 (2,152 to 3,784)     | 1,141 (785 to 1,484)      | 1,813 (1,337 to 2,319)    | 230.8 (164.5 to 293.2)  | 238.1 (136.6 to 495)   | 226.3 (144.5 to 293.9) |
|                                      |         | Age-standardized (rate per 100,000) | 5.1 (3.7 to 6.8)          | 4.1 (2.7 to 6.1)         | 6.2 (4.5 to 8.4)          | 4.8 (3.5 to 6.1)           | 3.8 (2.6 to 5)            | 5.7 (4.2 to 7.3)          | -6.8 (-26.8 to 11.8)    | -6.2 (-34.5 to 60.5)   | -8.3 (-30.3 to 9.6)    |
|                                      | DALYs   | All ages (number)                   | 28,787 (21,748 to 36,704) | 11,226 (8,049 to 15,112) | 17,561 (13,201 to 22,798) | 85,148 (63,783 to 107,389) | 34,328 (25,151 to 44,505) | 50,820 (37,937 to 64,388) | 195.8 (151.2 to 235.8)  | 205.8 (145.6 to 325.8) | 189.4 (133.5 to 235.4) |
|                                      |         | Age-standardized (rate per 100,000) | 116.9 (87.5 to 149.9)     | 95.5 (67.2 to 132)       | 137.6 (103.5 to 179.4)    | 117.9 (88.1 to 149.4)      | 96.7 (70.3 to 124.5)      | 139.4 (104.4 to 177)      | 0.9 (-14.5 to 15.3)     | 1.2 (-21.4 to 42.7)    | 1.3 (-18.4 to 17.9)    |
|                                      | YLLs    | All ages (number)                   | 19,808 (14,699 to 26,163) | 7,013 (4,445 to 10,224)  | 12,794 (9,369 to 17,269)  | 52,471 (38,866 to 66,925)  | 19,086 (13,386 to 24,713) | 33,386 (24,787 to 42,489) | 164.9 (110.7 to 214.4)  | 172.1 (99.8 to 397.3)  | 160.9 (93.5 to 216.5)  |
|                                      |         | Age-standardized (rate per 100,000) | 85.5 (63.2 to 112.7)      | 65.3 (42.3 to 95.5)      | 105.2 (77.1 to 141.2)     | 75.7 (55.5 to 96.6)        | 56.9 (39.8 to 73.5)       | 94.5 (70.2 to 120.6)      | -11.5 (-29 to 5.1)      | -12.9 (-36.7 to 53.6)  | -10.2 (-32.3 to 8)     |
|                                      | YLDs    | All ages (number)                   | 8,979 (6,545 to 11,850)   | 4,212 (3,074 to 5,595)   | 4,767 (3,411 to 6,361)    | 32,676 (23,676 to 43,230)  | 15,243 (11,011 to 20,303) | 17,434 (12,330 to 22,998) | 263.9 (239.4 to 294.9)  | 261.9 (234.5 to 297.7) | 265.7 (240.7 to 299.2) |
|                                      |         | Age-standardized (rate per 100,000) | 31.4 (22.8 to 41.4)       | 30.2 (22 to 40.1)        | 32.4 (23.2 to 43.2)       | 42.3 (30.5 to 55.9)        | 39.8 (28.5 to 52.8)       | 44.8 (31.9 to 59.5)       | 34.7 (26.2 to 45.8)     | 31.6 (22.4 to 43.8)    | 38.5 (29.6 to 49.6)    |

| Risk factor          | Measure | Age (metric)                        | Year                      |                          |                          |                           |                           |                           | % Change (1990 to 2019) |                        |                        |
|----------------------|---------|-------------------------------------|---------------------------|--------------------------|--------------------------|---------------------------|---------------------------|---------------------------|-------------------------|------------------------|------------------------|
|                      |         |                                     | 1990                      |                          |                          | 2019                      |                           |                           | Both                    | Female                 | Male                   |
|                      |         |                                     | Both                      | Female                   | Male                     | Both                      | Female                    | Male                      |                         |                        |                        |
| High body-mass index | Deaths  | All ages (number)                   | 694 (360 to 1,156)        | 363 (175 to 652)         | 331 (147 to 582)         | 1,071 (661 to 1,563)      | 545 (319 to 803)          | 526 (288 to 821)          | 54.3 (9.7 to 120.5)     | 50.2 (-10.6 to 125.9)  | 58.9 (19.3 to 145.9)   |
|                      |         | Age-standardized (rate per 100,000) | 3.3 (1.7 to 5.8)          | 3.6 (1.6 to 6.9)         | 3.1 (1.3 to 5.6)         | 1.6 (1 to 2.4)            | 1.7 (1 to 2.6)            | 1.6 (0.9 to 2.5)          | -50.6 (-67.3 to -27.1)  | -51.7 (-73.5 to -23)   | -48.7 (-62.8 to -17.7) |
|                      | DALYs   | All ages (number)                   | 27,026 (15,166 to 42,581) | 14,799 (8,179 to 23,743) | 12,227 (6,304 to 20,697) | 45,173 (28,239 to 65,667) | 23,463 (14,357 to 34,457) | 21,709 (12,615 to 33,250) | 67.1 (33 to 117.9)      | 58.5 (18.9 to 110.4)   | 77.6 (39.2 to 155.5)   |
|                      |         | Age-standardized (rate per 100,000) | 89.3 (48.3 to 146.8)      | 99.6 (52.1 to 167)       | 79.3 (39 to 138.1)       | 57 (36.3 to 81.8)         | 59.8 (36.6 to 87.3)       | 54.4 (32.1 to 82.7)       | -36.2 (-52.1 to -12)    | -40 (-59 to -16.1)     | -31.4 (-48.1 to 5.6)   |
|                      | YLLs    | All ages (number)                   | 17,928 (9,804 to 28,580)  | 9,396 (4,869 to 15,625)  | 8,532 (4,038 to 14,652)  | 22,572 (14,194 to 32,396) | 11,105 (6,549 to 16,192)  | 11,468 (6,555 to 17,870)  | 25.9 (-5.7 to 77.1)     | 18.2 (-23.5 to 70.5)   | 34.4 (1.6 to 110.6)    |
|                      |         | Age-standardized (rate per 100,000) | 66.4 (34.6 to 110.1)      | 71.7 (34.8 to 128.2)     | 61.2 (27.2 to 107.9)     | 30.7 (19.2 to 44.2)       | 30.7 (18.2 to 44.9)       | 30.8 (17.5 to 48)         | -53.8 (-67.5 to -33.4)  | -57.2 (-74.3 to -34.8) | -49.6 (-61.9 to -19)   |
|                      | YLDs    | All ages (number)                   | 9,098 (4,625 to 15,498)   | 5,403 (2,774 to 9,082)   | 3,695 (1,752 to 6,610)   | 22,600 (12,562 to 36,157) | 12,358 (6,814 to 20,640)  | 10,242 (5,426 to 17,415)  | 148.4 (117.2 to 208.4)  | 128.7 (99.9 to 179.1)  | 177.2 (133.4 to 275.8) |
|                      |         | Age-standardized (rate per 100,000) | 22.8 (11.5 to 39.2)       | 27.9 (14.2 to 47.4)      | 18.1 (8.2 to 33.6)       | 26.3 (14.6 to 42.3)       | 29.1 (16.4 to 47.7)       | 23.6 (12.7 to 40.1)       | 15.1 (-2.9 to 45.1)     | 4.2 (-10.3 to 28.7)    | 30.1 (3.8 to 83)       |



| Risk factor                              | Measure | Age (metric)                        | Year                    |                        |                        |                  |                  |                  | % Change (1990 to 2019) |                        |                        |
|------------------------------------------|---------|-------------------------------------|-------------------------|------------------------|------------------------|------------------|------------------|------------------|-------------------------|------------------------|------------------------|
|                                          |         |                                     | 1990                    |                        |                        | 2019             |                  |                  | Both                    | Female                 | Male                   |
|                                          |         |                                     | Both                    | Female                 | Male                   | Both             | Female           | Male             |                         |                        |                        |
| Household air pollution from solid fuels | Deaths  | All ages (number)                   | 204 (86 to 393)         | 93 (38 to 183)         | 111 (45 to 220)        | 7 (2 to 16)      | 3 (1 to 8)       | 4 (1 to 8)       | -96.6 (-98.7 to -91.4)  | -96.3 (-98.7 to -90.4) | -96.8 (-98.8 to -91.7) |
|                                          |         | Age-standardized (rate per 100,000) | 1.2 (0.5 to 2.2)        | 1.1 (0.4 to 2.2)       | 1.2 (0.5 to 2.3)       | 0 (0 to 0)       | 0 (0 to 0)       | 0 (0 to 0)       | -99 (-99.6 to -97.6)    | -99 (-99.6 to -97.3)   | -99.1 (-99.7 to -97.6) |
|                                          | DALYs   | All ages (number)                   | 6,598 (2,812 to 12,490) | 3,136 (1,336 to 5,968) | 3,462 (1,376 to 6,732) | 206 (74 to 476)  | 106 (39 to 242)  | 100 (34 to 226)  | -96.9 (-98.8 to -92.3)  | -96.6 (-98.7 to -91.7) | -97.1 (-98.9 to -92.6) |
|                                          |         | Age-standardized (rate per 100,000) | 26.6 (11.3 to 51.1)     | 26.2 (11 to 50.6)      | 26.8 (10.8 to 52.1)    | 0.3 (0.1 to 0.6) | 0.3 (0.1 to 0.7) | 0.3 (0.1 to 0.6) | -99 (-99.6 to -97.4)    | -98.9 (-99.6 to -97.2) | -99 (-99.6 to -97.5)   |
|                                          | YLLs    | All ages (number)                   | 4,590 (1,911 to 8,819)  | 2,002 (830 to 3,918)   | 2,588 (1,036 to 5,079) | 132 (45 to 309)  | 62 (22 to 150)   | 69 (23 to 158)   | -97.1 (-98.9 to -92.9)  | -96.9 (-98.8 to -92)   | -97.3 (-99 to -93)     |
|                                          |         | Age-standardized (rate per 100,000) | 19.6 (8.3 to 38)        | 18.1 (7.5 to 35.3)     | 21 (8.4 to 41.6)       | 0.2 (0.1 to 0.4) | 0.2 (0.1 to 0.4) | 0.2 (0.1 to 0.4) | -99.1 (-99.6 to -97.7)  | -99 (-99.6 to -97.4)   | -99.1 (-99.7 to -97.6) |
|                                          | YLDs    | All ages (number)                   | 2,007 (844 to 3,868)    | 1,134 (494 to 2,120)   | 874 (350 to 1,815)     | 74 (28 to 168)   | 43 (17 to 101)   | 31 (11 to 72)    | -96.3 (-98.6 to -90.9)  | -96.2 (-98.5 to -90.6) | -96.5 (-98.6 to -91.2) |
|                                          |         | Age-standardized (rate per 100,000) | 7 (3 to 13.5)           | 8.1 (3.5 to 14.9)      | 5.9 (2.4 to 12.2)      | 0.1 (0 to 0.2)   | 0.1 (0 to 0.3)   | 0.1 (0 to 0.2)   | -98.7 (-99.5 to -96.7)  | -98.6 (-99.5 to -96.6) | -98.7 (-99.5 to -96.7) |



| Risk factor             | Measure | Age (metric)                        | Year                    |                      |                         |                          |                        |                         | % Change (1990 to 2019) |                        |                        |
|-------------------------|---------|-------------------------------------|-------------------------|----------------------|-------------------------|--------------------------|------------------------|-------------------------|-------------------------|------------------------|------------------------|
|                         |         |                                     | 1990                    |                      |                         | 2019                     |                        |                         | Both                    | Female                 | Male                   |
|                         |         |                                     | Both                    | Female               | Male                    | Both                     | Female                 | Male                    |                         |                        |                        |
| Occupational asthmagens | Deaths  | All ages (number)                   | 194 (149 to 245)        | 17 (11 to 25)        | 177 (133 to 226)        | 134 (112 to 157)         | 15 (11 to 20)          | 119 (98 to 141)         | -31.1 (-47 to -5.3)     | -12.9 (-48.3 to 44.2)  | -32.9 (-49.5 to -5.8)  |
|                         |         | Age-standardized (rate per 100,000) | 0.7 (0.5 to 0.9)        | 0.1 (0.1 to 0.2)     | 1.2 (0.9 to 1.5)        | 0.2 (0.1 to 0.2)         | 0 (0 to 0)             | 0.3 (0.2 to 0.4)        | -75.1 (-81.4 to -65.2)  | -70.6 (-83.4 to -47.5) | -74.7 (-81.4 to -63.8) |
|                         | DALYs   | All ages (number)                   | 9,676 (7,616 to 12,076) | 1,062 (749 to 1,502) | 8,614 (6,722 to 10,801) | 10,217 (7,976 to 13,421) | 1,570 (1,119 to 2,167) | 8,648 (6,702 to 11,254) | 5.6 (-13.8 to 30.7)     | 47.8 (6.2 to 108.2)    | 0.4 (-19 to 26)        |
|                         |         | Age-standardized (rate per 100,000) | 27.4 (21.1 to 34.2)     | 5.9 (4.2 to 8.3)     | 47.1 (36.3 to 59.6)     | 11.1 (8.8 to 14.3)       | 3.3 (2.4 to 4.5)       | 18.7 (14.7 to 24.2)     | -59.6 (-67.6 to -49)    | -44.3 (-60.7 to -20.6) | -60.3 (-68.9 to -49.2) |
|                         | YLLs    | All ages (number)                   | 6,156 (4,820 to 7,599)  | 599 (404 to 842)     | 5,557 (4,291 to 6,979)  | 4,505 (3,784 to 5,279)   | 553 (417 to 733)       | 3,952 (3,189 to 4,680)  | -26.8 (-42.6 to 0.5)    | -7.6 (-42 to 48.1)     | -28.9 (-45.5 to -0.2)  |
|                         |         | Age-standardized (rate per 100,000) | 18.9 (14.7 to 23.6)     | 3.7 (2.4 to 5.2)     | 32.9 (24.9 to 41.6)     | 5.1 (4.3 to 6)           | 1.2 (0.9 to 1.6)       | 9.1 (7.4 to 10.8)       | -72.9 (-79 to -62.5)    | -66.9 (-80 to -45.4)   | -72.4 (-79 to -61.2)   |
|                         | YLDs    | All ages (number)                   | 3,520 (2,182 to 5,351)  | 463 (272 to 727)     | 3,056 (1,888 to 4,700)  | 5,712 (3,613 to 8,588)   | 1,016 (615 to 1,563)   | 4,696 (2,981 to 7,108)  | 62.3 (38.9 to 85.8)     | 119.3 (67 to 195.3)    | 53.6 (29.8 to 78.2)    |
|                         |         | Age-standardized (rate per 100,000) | 8.4 (5.2 to 12.7)       | 2.3 (1.3 to 3.5)     | 14.2 (8.8 to 21.6)      | 5.9 (3.8 to 8.8)         | 2.1 (1.3 to 3.2)       | 9.6 (6.1 to 14.5)       | -29.7 (-39.1 to -20)    | -7.5 (-29.3 to 22.6)   | -32.1 (-41.8 to -21.5) |

| Risk factor                       | Measure | Age (metric)                        | Year             |                  |                  |                      |                    |                  | % Change (1990 to 2019) |                          |                        |
|-----------------------------------|---------|-------------------------------------|------------------|------------------|------------------|----------------------|--------------------|------------------|-------------------------|--------------------------|------------------------|
|                                   |         |                                     | 1990             |                  |                  | 2019                 |                    |                  | Both                    | Female                   | Male                   |
|                                   |         |                                     | Both             | Female           | Male             | Both                 | Female             | Male             |                         |                          |                        |
| Occupational exposure to asbestos | Deaths  | All ages (number)                   | 2 (2 to 3)       | 1 (0 to 1)       | 2 (1 to 3)       | 13 (10 to 21)        | 3 (1 to 5)         | 10 (8 to 17)     | 495.6 (304.3 to 827.6)  | 527.1 (237.5 to 1072.7)  | 485.3 (242 to 889.9)   |
|                                   |         | Age-standardized (rate per 100,000) | 0 (0 to 0)       | 0 (0 to 0)       | 0 (0 to 0)       | 0 (0 to 0)           | 0 (0 to 0)         | 0 (0 to 0.1)     | 101.7 (34.8 to 211.8)   | 78.6 (-5.7 to 242.3)     | 114.4 (19.6 to 260.5)  |
|                                   | DALYs   | All ages (number)                   | 136 (100 to 184) | 83 (55 to 120)   | 53 (35 to 78)    | 1,067 (759 to 1,463) | 851 (554 to 1,249) | 215 (173 to 314) | 684.9 (511.9 to 856.2)  | 931.5 (747.1 to 1103)    | 303.6 (147.8 to 537)   |
|                                   |         | Age-standardized (rate per 100,000) | 0.4 (0.3 to 0.5) | 0.5 (0.3 to 0.7) | 0.3 (0.2 to 0.5) | 1.3 (0.9 to 1.7)     | 2 (1.3 to 2.9)     | 0.6 (0.5 to 0.9) | 219.2 (146.8 to 293.3)  | 323.8 (253.3 to 390)     | 76.5 (7.2 to 175.2)    |
|                                   | YLLs    | All ages (number)                   | 64 (44 to 93)    | 14 (7 to 26)     | 50 (32 to 75)    | 288 (231 to 408)     | 76 (25 to 118)     | 212 (169 to 309) | 350.8 (201.8 to 585.2)  | 434.5 (169.3 to 947.5)   | 326.6 (154.4 to 596.2) |
|                                   |         | Age-standardized (rate per 100,000) | 0.2 (0.1 to 0.3) | 0.1 (0 to 0.2)   | 0.3 (0.2 to 0.5) | 0.4 (0.3 to 0.6)     | 0.2 (0.1 to 0.3)   | 0.6 (0.4 to 0.9) | 84.6 (24.9 to 176.8)    | 96.3 (-0.5 to 263.8)     | 86 (10.3 to 198.1)     |
|                                   | YLDs    | All ages (number)                   | 72 (45 to 110)   | 68 (43 to 104)   | 4 (2 to 6)       | 779 (489 to 1,175)   | 775 (486 to 1,170) | 4 (2 to 7)       | 981.6 (826 to 1145.4)   | 1035.7 (871.8 to 1210.4) | 0.5 (-35.5 to 34.4)    |
|                                   |         | Age-standardized (rate per 100,000) | 0.2 (0.1 to 0.3) | 0.4 (0.2 to 0.5) | 0 (0 to 0)       | 0.9 (0.6 to 1.3)     | 1.8 (1.1 to 2.7)   | 0 (0 to 0)       | 366.5 (313 to 421)      | 389.9 (334.4 to 446.8)   | -58.5 (-71.4 to -45.4) |



| Risk factor                     | Measure | Age (metric)                        | Year             |                  |                  |                  |                  |                  | % Change (1990 to 2019) |                        |                        |
|---------------------------------|---------|-------------------------------------|------------------|------------------|------------------|------------------|------------------|------------------|-------------------------|------------------------|------------------------|
|                                 |         |                                     | 1990             |                  |                  | 2019             |                  |                  | Both                    | Female                 | Male                   |
|                                 |         |                                     | Both             | Female           | Male             | Both             | Female           | Male             |                         |                        |                        |
| Occupational exposure to silica | Deaths  | All ages (number)                   | 4 (2 to 5)       | 0 (0 to 1)       | 3 (2 to 5)       | 15 (6 to 20)     | 3 (1 to 4)       | 13 (4 to 17)     | 326 (52.6 to 754.8)     | 656.2 (308.3 to 1207)  | 287.5 (0.1 to 752.5)   |
|                                 |         | Age-standardized (rate per 100,000) | 0 (0 to 0)       | 0 (0 to 0)       | 0 (0 to 0)       | 0 (0 to 0)       | 0 (0 to 0)       | 0 (0 to 0.1)     | 49.7 (-46.7 to 196.2)   | 140.7 (20.8 to 314.1)  | 36.2 (-63.9 to 200.7)  |
|                                 | DALYs   | All ages (number)                   | 107 (68 to 150)  | 13 (8 to 21)     | 94 (56 to 137)   | 396 (187 to 497) | 68 (35 to 104)   | 327 (117 to 427) | 268.8 (58.4 to 586.9)   | 430.8 (231.3 to 762.8) | 246.8 (15.4 to 603.8)  |
|                                 |         | Age-standardized (rate per 100,000) | 0.4 (0.2 to 0.5) | 0.1 (0.1 to 0.1) | 0.6 (0.4 to 0.9) | 0.5 (0.3 to 0.7) | 0.2 (0.1 to 0.3) | 0.9 (0.3 to 1.2) | 45.7 (-36.7 to 165.1)   | 118.8 (33.5 to 241.6)  | 39.3 (-52.8 to 178.7)  |
|                                 | YLLs    | All ages (number)                   | 99 (60 to 142)   | 11 (7 to 20)     | 87 (49 to 129)   | 354 (150 to 453) | 63 (30 to 99)    | 290 (82 to 388)  | 257.5 (36.9 to 618.2)   | 450.4 (232.6 to 841.8) | 232.2 (-14.6 to 630.9) |
|                                 |         | Age-standardized (rate per 100,000) | 0.3 (0.2 to 0.5) | 0.1 (0 to 0.1)   | 0.6 (0.3 to 0.8) | 0.5 (0.2 to 0.6) | 0.2 (0.1 to 0.3) | 0.8 (0.2 to 1)   | 41.4 (-46.7 to 178.8)   | 130.6 (30.6 to 275.5)  | 33.6 (-65.3 to 194.1)  |
|                                 | YLDs    | All ages (number)                   | 8 (5 to 13)      | 1 (1 to 2)       | 7 (4 to 11)      | 42 (26 to 64)    | 5 (3 to 7)       | 37 (23 to 58)    | 403.4 (298.8 to 560.5)  | 259.4 (204.1 to 382)   | 430.5 (313.9 to 604.3) |
|                                 |         | Age-standardized (rate per 100,000) | 0 (0 to 0.1)     | 0 (0 to 0)       | 0.1 (0 to 0.1)   | 0.1 (0 to 0.1)   | 0 (0 to 0)       | 0.1 (0.1 to 0.2) | 88.2 (52.5 to 143.7)    | 34.4 (17 to 71.5)      | 96.7 (57.1 to 160)     |

| Risk factor                                       | Measure | Age (metric)                        | Year                      |                      |                           |                           |                        |                           | % Change (1990 to 2019) |                        |                        |
|---------------------------------------------------|---------|-------------------------------------|---------------------------|----------------------|---------------------------|---------------------------|------------------------|---------------------------|-------------------------|------------------------|------------------------|
|                                                   |         |                                     | 1990                      |                      |                           | 2019                      |                        |                           |                         |                        |                        |
|                                                   |         |                                     | Both                      | Female               | Male                      | Both                      | Female                 | Male                      | Both                    | Female                 | Male                   |
| Occupational particulate matter, gases, and fumes | Deaths  | All ages (number)                   | 467 (357 to 609)          | 42 (26 to 66)        | 425 (317 to 562)          | 1,370 (1,054 to 1,717)    | 138 (94 to 191)        | 1,232 (915 to 1,582)      | 193.6 (119 to 263.5)    | 226.7 (129.2 to 451.8) | 190.3 (107.7 to 267)   |
|                                                   |         | Age-standardized (rate per 100,000) | 2.4 (1.8 to 3.2)          | 0.5 (0.3 to 0.8)     | 4.5 (3.2 to 6.1)          | 2.2 (1.6 to 2.8)          | 0.5 (0.3 to 0.6)       | 3.9 (2.8 to 5)            | -9.7 (-29.9 to 7.3)     | -8.7 (-36.9 to 51.8)   | -14.1 (-34.6 to 3.7)   |
|                                                   | DALYs   | All ages (number)                   | 14,656 (11,700 to 18,213) | 1,364 (952 to 1,943) | 13,292 (10,317 to 16,809) | 38,763 (31,681 to 45,942) | 4,264 (3,295 to 5,319) | 34,499 (27,723 to 41,403) | 164.5 (112.8 to 208)    | 212.6 (141.2 to 331)   | 159.5 (102.5 to 207.8) |
|                                                   |         | Age-standardized (rate per 100,000) | 57.4 (45.3 to 72.1)       | 11.7 (8 to 17)       | 102.6 (79.2 to 130.1)     | 54 (44 to 64.7)           | 11.9 (9 to 15.2)       | 96.1 (76.2 to 117.1)      | -5.9 (-22.8 to 7.8)     | 1.7 (-21 to 43.3)      | -6.4 (-24.7 to 8.4)    |
|                                                   | YLLs    | All ages (number)                   | 10,739 (8,300 to 13,921)  | 893 (556 to 1,323)   | 9,846 (7,438 to 13,155)   | 25,599 (20,795 to 30,593) | 2,470 (1,817 to 3,180) | 23,128 (18,381 to 28,058) | 138.4 (79.2 to 191.1)   | 176.7 (101.8 to 399.3) | 134.9 (70.3 to 190.8)  |
|                                                   |         | Age-standardized (rate per 100,000) | 43.7 (34 to 56.3)         | 8.2 (5.1 to 12.6)    | 79.1 (59.6 to 104.5)      | 36.7 (29.5 to 44.2)       | 7.2 (5.2 to 9.6)       | 66.2 (52.3 to 81.1)       | -16 (-35 to -0.2)       | -11.7 (-36.6 to 54.8)  | -16.3 (-37.2 to 0.9)   |
|                                                   | YLDs    | All ages (number)                   | 3,917 (2,944 to 4,923)    | 471 (330 to 651)     | 3,446 (2,518 to 4,399)    | 13,164 (10,112 to 16,246) | 1,794 (1,312 to 2,291) | 11,370 (8,577 to 14,309)  | 236 (210.1 to 268)      | 280.6 (223.7 to 352)   | 229.9 (201 to 264.3)   |
|                                                   |         | Age-standardized (rate per 100,000) | 13.7 (10.3 to 16.9)       | 3.5 (2.5 to 4.8)     | 23.5 (17.3 to 29.9)       | 17.3 (13.2 to 21.7)       | 4.7 (3.4 to 6.1)       | 29.9 (22.3 to 38.4)       | 26.5 (18.8 to 35.4)     | 33.2 (15.7 to 55.4)    | 27.1 (19.7 to 35.5)    |

| Risk factor      | Measure | Age (metric)                        | Year                     |                        |                         |                           |                          |                          | % Change (1990 to 2019) |                        |                        |
|------------------|---------|-------------------------------------|--------------------------|------------------------|-------------------------|---------------------------|--------------------------|--------------------------|-------------------------|------------------------|------------------------|
|                  |         |                                     | 1990                     |                        |                         | 2019                      |                          |                          | Both                    | Female                 | Male                   |
|                  |         |                                     | Both                     | Female                 | Male                    | Both                      | Female                   | Male                     |                         |                        |                        |
| Secondhand smoke | Deaths  | All ages (number)                   | 388 (195 to 600)         | 165 (77 to 266)        | 223 (107 to 350)        | 1,171 (603 to 1,773)      | 503 (253 to 774)         | 668 (344 to 1,012)       | 202 (138 to 266.4)      | 205 (117.3 to 436.5)   | 199.8 (121.6 to 276.7) |
|                  |         | Age-standardized (rate per 100,000) | 2.2 (1.1 to 3.3)         | 1.9 (0.9 to 3.1)       | 2.5 (1.2 to 3.9)        | 1.9 (1 to 2.8)            | 1.7 (0.8 to 2.5)         | 2.1 (1.1 to 3.2)         | -13.1 (-31.8 to 5.1)    | -11.6 (-37.7 to 51.6)  | -15 (-37.3 to 7.5)     |
|                  | DALYs   | All ages (number)                   | 13,109 (6,763 to 19,808) | 6,234 (3,114 to 9,533) | 6,876 (3,481 to 10,747) | 35,733 (18,543 to 53,775) | 17,399 (8,936 to 26,058) | 18,335 (9,586 to 28,181) | 172.6 (134.3 to 212.4)  | 179.1 (131.4 to 284.3) | 166.7 (109.5 to 222.8) |
|                  |         | Age-standardized (rate per 100,000) | 51.6 (26.2 to 78.3)      | 49 (23.9 to 76.3)      | 54.1 (27.6 to 83.8)     | 48.8 (25.4 to 73.4)       | 46.8 (24.3 to 70)        | 51 (26.6 to 78.3)        | -5.3 (-20 to 9)         | -4.5 (-23.6 to 31.1)   | -5.8 (-26.5 to 14.3)   |
|                  | YLLs    | All ages (number)                   | 8,817 (4,398 to 13,694)  | 3,751 (1,739 to 5,947) | 5,066 (2,457 to 8,032)  | 21,314 (11,060 to 31,872) | 9,164 (4,675 to 13,987)  | 12,149 (6,167 to 18,269) | 141.7 (92.9 to 192.3)   | 144.3 (82.2 to 344.2)  | 139.8 (74.6 to 202.4)  |
|                  |         | Age-standardized (rate per 100,000) | 37 (18.7 to 57.1)        | 32.3 (15 to 51.8)      | 41.7 (20 to 65.2)       | 30.5 (15.9 to 45.9)       | 26.3 (13.4 to 40.2)      | 34.8 (17.8 to 52.3)      | -17.7 (-34.7 to -0.6)   | -18.7 (-40.4 to 46)    | -16.6 (-38.4 to 4.6)   |
|                  | YLDs    | All ages (number)                   | 4,292 (2,209 to 6,645)   | 2,483 (1,287 to 3,856) | 1,809 (904 to 2,890)    | 14,420 (7,434 to 22,153)  | 8,234 (4,160 to 12,591)  | 6,185 (3,129 to 9,535)   | 236 (208.7 to 264.7)    | 231.7 (204.1 to 261)   | 241.8 (196.4 to 292.8) |
|                  |         | Age-standardized (rate per 100,000) | 14.5 (7.4 to 22.5)       | 16.7 (8.6 to 25.9)     | 12.4 (6.2 to 19.7)      | 18.3 (9.2 to 28.2)        | 20.5 (10.4 to 31.4)      | 16.2 (8 to 25.2)         | 26.2 (16.7 to 36.5)     | 22.8 (13.1 to 33.2)    | 30.6 (14.5 to 48.2)    |

| Risk factor | Measure | Age (metric)                        | Year                      |                          |                           |                              |                           |                              | % Change (1990 to 2019) |                        |                        |
|-------------|---------|-------------------------------------|---------------------------|--------------------------|---------------------------|------------------------------|---------------------------|------------------------------|-------------------------|------------------------|------------------------|
|             |         |                                     | 1990                      |                          |                           | 2019                         |                           |                              |                         |                        |                        |
|             |         |                                     | Both                      | Female                   | Male                      | Both                         | Female                    | Male                         | Both                    | Female                 | Male                   |
| Smoking     | Deaths  | All ages (number)                   | 2,366 (1,991 to 2,923)    | 315 (207 to 447)         | 2,052 (1,716 to 2,629)    | 5,300 (4,650 to 5,936)       | 645 (475 to 827)          | 4,654 (4,058 to 5,251)       | 124 (79.5 to 163.1)     | 105.1 (42.2 to 237.8)  | 126.9 (74 to 172.6)    |
|             |         | Age-standardized (rate per 100,000) | 11.6 (9.7 to 14.3)        | 3.1 (2 to 4.5)           | 20.8 (17.2 to 26.1)       | 8.3 (7.3 to 9.4)             | 2 (1.5 to 2.6)            | 14.5 (12.5 to 16.4)          | -28.1 (-42.7 to -16.4)  | -34.5 (-55.2 to 8.7)   | -30.5 (-46.6 to -17.5) |
|             | DALYs   | All ages (number)                   | 73,912 (62,396 to 88,555) | 10,496 (7,559 to 14,117) | 63,415 (53,168 to 77,585) | 155,978 (136,634 to 173,945) | 22,110 (17,450 to 27,581) | 133,868 (117,002 to 149,297) | 111 (75.1 to 140.2)     | 110.6 (59 to 199.8)    | 111.1 (71.2 to 144.6)  |
|             |         | Age-standardized (rate per 100,000) | 285.2 (242.9 to 341.7)    | 84 (59.6 to 112.7)       | 484 (409.2 to 591.9)      | 216 (189.9 to 240.8)         | 61.4 (48 to 76.9)         | 369.8 (324.9 to 411.6)       | -24.3 (-37.1 to -14.3)  | -26.9 (-44.9 to 4.3)   | -23.6 (-37.7 to -11.9) |
|             | YLLs    | All ages (number)                   | 55,141 (46,564 to 68,508) | 7,158 (4,744 to 9,897)   | 47,983 (40,037 to 61,265) | 101,466 (89,211 to 112,257)  | 12,718 (9,647 to 16,187)  | 88,748 (77,018 to 98,623)    | 84 (45.8 to 115.1)      | 77.7 (27.7 to 184.4)   | 85 (40.3 to 122.7)     |
|             |         | Age-standardized (rate per 100,000) | 219.4 (183.7 to 270.2)    | 59.5 (38.8 to 84.1)      | 378 (314 to 481.6)        | 144.7 (128.4 to 160.7)       | 36.7 (27.5 to 46.7)       | 252.4 (220.3 to 281.1)       | -34 (-47.4 to -23.2)    | -38.4 (-56.2 to 1.4)   | -33.2 (-48.9 to -20.5) |
|             | YLDs    | All ages (number)                   | 18,771 (14,228 to 23,199) | 3,339 (2,319 to 4,474)   | 15,432 (11,633 to 19,024) | 54,512 (42,575 to 65,572)    | 9,392 (7,083 to 11,865)   | 45,120 (35,286 to 54,837)    | 190.4 (165.7 to 218.3)  | 181.3 (120.1 to 262.4) | 192.4 (169.3 to 220.1) |
|             |         | Age-standardized (rate per 100,000) | 65.9 (50.5 to 81.1)       | 24.5 (17.2 to 32.8)      | 106 (81 to 130.4)         | 71.3 (56.3 to 85.2)          | 24.8 (18.7 to 31.4)       | 117.4 (92.1 to 142)          | 8.2 (-0.6 to 18.4)      | 1.2 (-20.1 to 30.3)    | 10.7 (2.3 to 20.4)     |

Data in parentheses are 95% Uncertainty Intervals (95% UIs)

DALYs= Disability-Adjusted Life Years; YLLs= Years of Life Lost; YLDs= Years Lived with Disability
